# Supplementary material for: Evaluation of fully-functionalized diazirine tags for chemical proteomic applications
Source: Chem Sci. 2021 May 7;12(22):7839–47. doi: 10.1039/d1sc01360b (PMC8188597; doi:10.1039/d1sc01360b)
Supplement: SC-012-D1SC01360B-s001 [file SC-012-D1SC01360B-s001.xlsx]

## Sheet: LD
Calibration Curve
	Integrals
Concentration	Replicate 1		Replicate 2		Replicate 3			Ratios
/ µM	Probe	Standard	Probe	Standard	Probe	Standard		Replicate 1	Replicate 2	Replicate 3		Mean	SD
2.5	82278	34190	87297	36572	52208	23983		2.40649	2.38699	2.17688		2.32345	0.127314
1.25	46240	38256	31525	24022	47614	36094		1.2087	1.31234	1.31917		1.28007	0.0619015
0.625	22025	33902	17602	30997	23747	35655		0.649667	0.567861	0.666022		0.62785	0.0525912
0.3125	11985	38246	13718	37880	12650	38537		0.313366	0.362144	0.328256		0.334589	0.0249978
0.15625	6255	38524	7352	32258	8776	55658		0.162366	0.227912	0.157677		0.182652	0.0392668
0.078125	3882	32461	3545	31600	3952	34320		0.11959	0.112184	0.115152		0.115642	0.0037273
Timecourse (365 nm)
	Integrals
	Replicate 1		Replicate 2		Replicate 3			Ratios				Concentrations
Time / min	Probe	Standard	Probe	Standard	Probe	Standard		Replicate 1	Replicate 2	Replicate 3		Replicate 1	Replicate 2	Replicate 3	Mean	SD
0	73753	28832	68527	27126	89003	26849		2.55803	2.52625	3.31495		2.71826	2.68374	3.54043	2.98081	0.484952
2	54807	25460	65320	30351	54556	31686		2.15267	2.15215	1.72177		2.27796	2.2774	1.80991	2.12176	0.270065
5	48891	36945	76281	52375	51651	31345		1.32335	1.45644	1.64782		1.37714	1.52171	1.72959	1.54281	0.17717
10	23784	26361	32948	38449	19741	23196		0.902242	0.856927	0.851052		0.919736	0.870515	0.864133	0.884795	0.0304278
30	3470	45535	2894	35873	2695	36798		0.0762051	0.0806735	0.0732377		0.0224905	0.0273441	0.0192673	0.023034	0.00406574
60	23	42181	44	38970	18	38110		0.000545269	0.00112907	0.000472317		-0.0596916	-0.0590575	-0.0597709	-0.0595067	0.000391004

## Sheet: Ar
Calibration Curve
	Integrals
Concentration	Replicate 1		Replicate 2		Replicate 3			Ratios
/ µM	Probe	Standard	Probe	Standard	Probe	Standard		Replicate 1	Replicate 2	Replicate 3		Mean	SD
1	65749	35307	56885	30403	64848	34960		1.86221	1.87103	1.85492		1.86272	0.00806846
0.5	28583	29471	30038	30150	23244	22985		0.969869	0.996285	1.01127		0.992474	0.0209613
0.25	16620	32110	14769	29102	15533	29023		0.517596	0.507491	0.535196		0.520094	0.0140206
0.125	14558	50055	7262	26371	8569	31805		0.29084	0.275378	0.269423		0.278547	0.0110546
0.0625	2936	20615	5225	36550	4419	31011		0.142421	0.142955	0.142498		0.142624	0.000288765
0.03125	2195	30333	2513	33531	2291	32169		0.0723634	0.0749456	0.0712176		0.0728422	0.00190953
Timecourse (365 nm)
	Integrals
	Replicate 1		Replicate 2		Replicate 3			Ratios				Concentrations
Time / min	Probe	Standard	Probe	Standard	Probe	Standard		Replicate 1	Replicate 2	Replicate 3		Replicate 1	Replicate 2	Replicate 3	Mean	SD
0	62707	31291	59663	29201	59971	30741		2.00399	2.04318	1.95085		1.06603	1.08731	1.03717	1.0635	0.0251614
2	13962	27323	11038	21685	15303	31207		0.510998	0.509015	0.490371		0.255434	0.254358	0.244235	0.251342	0.00617862
5	13636	28252	15052	30750	15709	33848		0.482656	0.489496	0.464104		0.240047	0.24376	0.229974	0.237927	0.00713321
10	14057	32404	12443	29392	18017	39688		0.433804	0.423346	0.453966		0.213523	0.207845	0.22447	0.21528	0.00845011
30	8380	27766	9486	32033	10720	35318		0.301808	0.296132	0.303528		0.141858	0.138777	0.142792	0.141142	0.00210127
60	5123	33695	4104	26370	5964	36740		0.15204	0.155631	0.16233		0.0605449	0.0624945	0.0661314	0.0630569	0.00283539
90	5881	74125	3465	42339	2609	30597		0.079339	0.0818394	0.0852698		0.021073	0.0224306	0.024293	0.0225989	0.0016166

## Sheet: BD
Calibration Curve
	Integrals
Concentration	Replicate 1		Replicate 2		Replicate 3			Ratios
/ µM	Probe	Standard	Probe	Standard	Probe	Standard		Replicate 1	Replicate 2	Replicate 3		Mean	SD
0.5	35144	28092	36499	29275	34706	26888		1.25103	1.24676	1.29076		1.26285	0.0242641
0.25	19564	28434	17719	27685	17822	29881		0.68805	0.640022	0.596433		0.641501	0.0458264
0.125	7661	24403	8553	27163	8197	24920		0.313937	0.314877	0.328933		0.319249	0.00839961
0.0625	3253	20993	4399	25762	4363	27063		0.154956	0.170755	0.161216		0.162309	0.00795599
0.03125	2166	27268	2274	28583	2245	26931		0.0794338	0.0795578	0.0833612		0.0807842	0.00223256
0.015625	1208	29583	974	25665	952	24210		0.0408343	0.0379505	0.0393226		0.0393691	0.00144244
Timecourse (365 nm)
	Integrals
	Replicate 1		Replicate 2		Replicate 3			Ratios				Concentrations
Time / min	Probe	Standard	Probe	Standard	Probe	Standard		Replicate 1	Replicate 2	Replicate 3		Replicate 1	Replicate 2	Replicate 3	Mean	SD
0	30952	18856	38900	23776	32724	19520		1.64149	1.6361	1.67643		0.648559	0.646425	0.662391	0.652458	0.00866823
2	20640	20681	22973	23646	24188	25941		0.998018	0.971539	0.932424		0.393813	0.38333	0.367845	0.381663	0.013064
5	11477	25181	11292	24799	13619	31926		0.45578	0.455341	0.42658		0.179147	0.178973	0.167587	0.175236	0.00662452
10	4494	33029	3317	25945	3046	24673		0.136062	0.127847	0.123455		0.0525739	0.0493217	0.0475827	0.0498261	0.00253352
30	0	27326	0	28708	0	28812		0	0	0		-0.00129176	-0.00129176	-0.00129176	-0.00129176	0
60	0	32272	0	21499	0	30694		0	0	0		-0.00129176	-0.00129176	-0.00129176	-0.00129176	0

## Sheet: DF
Calibration Curve
	Integrals
Concentration	Replicate 1		Replicate 2		Replicate 3			Ratios
/ µM	Probe	Standard	Probe	Standard	Probe	Standard		Replicate 1	Replicate 2	Replicate 3		Mean	SD
1	51196	28479	48580	27869	25727	14301		1.79768	1.74316	1.79897		1.77993	0.0318559
0.5	25334	28067	19561	21313	26191	29293		0.902626	0.917797	0.894104		0.904842	0.0120006
0.25	13976	32946	12943	28479	15379	33419		0.424209	0.454475	0.460187		0.446291	0.0193351
0.125	6822	29071	4714	19729	6078	32292		0.234667	0.238938	0.18822		0.220608	0.0281301
0.0625	3598	27777	4120	33592	3673	29362		0.129532	0.122648	0.125094		0.125758	0.00348942
0.03125	1646	27918	1308	20301	1862	26526		0.0589584	0.0644303	0.0701953		0.064528	0.00561909
Timecourse (310 nm)
	Integrals
	Replicate 1		Replicate 2		Replicate 3			Ratios				Concentrations / µM
Time / min	Probe	Standard	Probe	Standard	Probe	Standard		Replicate 1	Replicate 2	Replicate 3		Replicate 1	Replicate 2	Replicate 3	Mean	SD
0	55470	35305	52559	32244	63563	36841		1.57117	1.63004	1.72533		0.880834	0.91401	0.967709	0.920851	0.0438394
2	47831	33163	36637	25705	51413	35614		1.4423	1.42529	1.44362		0.808218	0.798631	0.80896	0.805269	0.00576139
5	39282	34289	35293	29178	39850	34063		1.14562	1.20958	1.16989		0.641034	0.677076	0.654713	0.657608	0.0181946
10	21237	26326	26898	32483	28438	33859		0.806693	0.828064	0.839895		0.450049	0.462092	0.468758	0.4603	0.00948258
30	7279	36849	16661	77795	9937	46813		0.197536	0.214165	0.21227		0.106785	0.116156	0.115088	0.112676	0.00512982
60	635	37317	805	38439	808	42167		0.0170164	0.0209423	0.0191619		0.0050611	0.00727337	0.00627012	0.00620153	0.00110773
90	0	32241	45	44352	0	43644		0	0.00101461	0		-0.00452774	-0.003956	-0.00452774	-0.00433716	0.000330094
Timecourse (365 nm)
	Integrals
	Replicate 1		Replicate 2		Replicate 3			Ratios				Concentrations / µM
Time / min	Probe	Standard	Probe	Standard	Probe	Standard		Replicate 1	Replicate 2	Replicate 3		Replicate 1	Replicate 2	Replicate 3	Mean	SD
0	34860	21820	48727	33128	48543	30944		1.59762	1.47087	1.56874		0.89574	0.824317	0.879466	0.866507	0.0374329
2	41899	26921	42525	27732	56907	37677		1.55637	1.53343	1.51039		0.872496	0.859568	0.846587	0.85955	0.0129544
5	47870	33122	56817	38433	51934	33404		1.44526	1.47834	1.55472		0.809887	0.828526	0.871569	0.836661	0.0316354
10	56483	36532	43012	28693	52212	33432		1.54612	1.49904	1.56174		0.866723	0.840192	0.875521	0.860812	0.0183915
30	49896	35125	37210	23419	52648	35397		1.42053	1.58888	1.48736		0.795948	0.890817	0.833608	0.840124	0.0477688
60	54850	38258	51482	35820	59973	42322		1.43369	1.43724	1.41706		0.803364	0.805367	0.793997	0.800909	0.00606947
90	60647	40049	60698	40411	59693	40718		1.51432	1.50202	1.46601		0.848801	0.841868	0.821578	0.837416	0.0141471

## Sheet: Tm
Calibration Curve
	Integrals
Concentration	Replicate 1		Replicate 2		Replicate 3			Ratios
/ µM	Probe	Standard	Probe	Standard	Probe	Standard		Replicate 1	Replicate 2	Replicate 3		Mean	SD
0.5	35144	28092	36499	29275	34706	26888		1.25103	1.24676	1.29076		1.26285	0.0242641
0.25	19564	28434	17719	27685	17822	29881		0.68805	0.640022	0.596433		0.641501	0.0458264
0.125	7661	24403	8553	27163	8197	24920		0.313937	0.314877	0.328933		0.319249	0.00839961
0.0625	3253	20993	4399	25762	4363	27063		0.154956	0.170755	0.161216		0.162309	0.00795599
0.03125	2166	27268	2274	28583	2245	26931		0.0794338	0.0795578	0.0833612		0.0807842	0.00223256
0.015625	1208	29583	974	25665	952	24210		0.0408343	0.0379505	0.0393226		0.0393691	0.00144244
Timecourse (310 nm)
	Integrals
	Replicate 1		Replicate 2		Replicate 3			Ratios				Concentrations
Time / min	Probe	Standard	Probe	Standard	Probe	Standard		Replicate 1	Replicate 2	Replicate 3		Replicate 1	Replicate 2	Replicate 3	Mean	SD
0	16819	31351	20011	37075	20411	37583		0.536474	0.539744	0.543091		0.211093	0.212387	0.213713	0.212398	0.00130987
2	25634	56249	15151	32753	12027	26128		0.455724	0.462584	0.460311		0.179125	0.18184	0.180941	0.180635	0.00138341
5	10947	34351	9259	30452	7674	24641		0.318681	0.304052	0.311432		0.124871	0.119079	0.122001	0.121984	0.00289566
10	5702	35652	5110	31886	4399	29036		0.159935	0.160258	0.151502		0.0620248	0.0621529	0.0586862	0.0609546	0.0019656
30	355	37790	213	25679	163	19795		0.00939402	0.00829472	0.0082344		0.00242724	0.00199204	0.00196816	0.00212914	0.000258433
60	1	39460	0	41205	0	41325		2.53421e-05	0	0		-0.00128172	-0.00129176	-0.00129176	-0.00128841	5.79237e-06
90	0	44334	0	34691	0	48429		0	0	0		-0.00129176	-0.00129176	-0.00129176	-0.00129176	0
Timecourse (365 nm)
	Integrals
	Replicate 1		Replicate 2		Replicate 3			Ratios				Concentrations
Time / min	Probe	Standard	Probe	Standard	Probe	Standard		Replicate 1	Replicate 2	Replicate 3		Replicate 1	Replicate 2	Replicate 3	Mean	SD
0	45495	28811	46116	28646	39228	24249		1.57908	1.60986	1.61772		0.623852	0.636035	0.639146	0.633011	0.008083
2	39472	24084	46359	27415	32812	19265		1.63893	1.69101	1.70319		0.647544	0.668161	0.672985	0.662897	0.0135127
5	41786	26203	35734	21715	52567	32375		1.5947	1.64559	1.62369		0.630035	0.650181	0.641511	0.640575	0.0101055
10	32094	19647	44233	27412	37456	22486		1.63353	1.61364	1.66575		0.645407	0.63753	0.658161	0.647033	0.0104108
30	30236	18510	32242	19763	42711	27177		1.6335	1.63143	1.57159		0.645392	0.644576	0.620883	0.63695	0.0139206
60	49521	35254	47771	31648	52241	34923		1.40469	1.50945	1.49589		0.554811	0.596283	0.590916	0.58067	0.0225547
90	29659	22399	49484	32923	50997	33022		1.32412	1.50302	1.54433		0.522914	0.593739	0.610094	0.575583	0.0463393
