# Supplementary material for: Evaluation of fully-functionalized diazirine tags for chemical proteomic applications
Source: PubMed Central journal article supplement (PMC8188597; doi:10.1039/d1sc01360b), 2021-05-07
Supplement: SC-012-D1SC01360B-s003.pdf [file SC-012-D1SC01360B-s003.pdf]

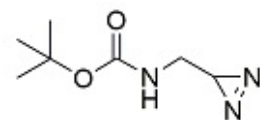

**S1**

(<sup>1</sup>H NMR 400 MHz, CDCl<sub>3</sub>)

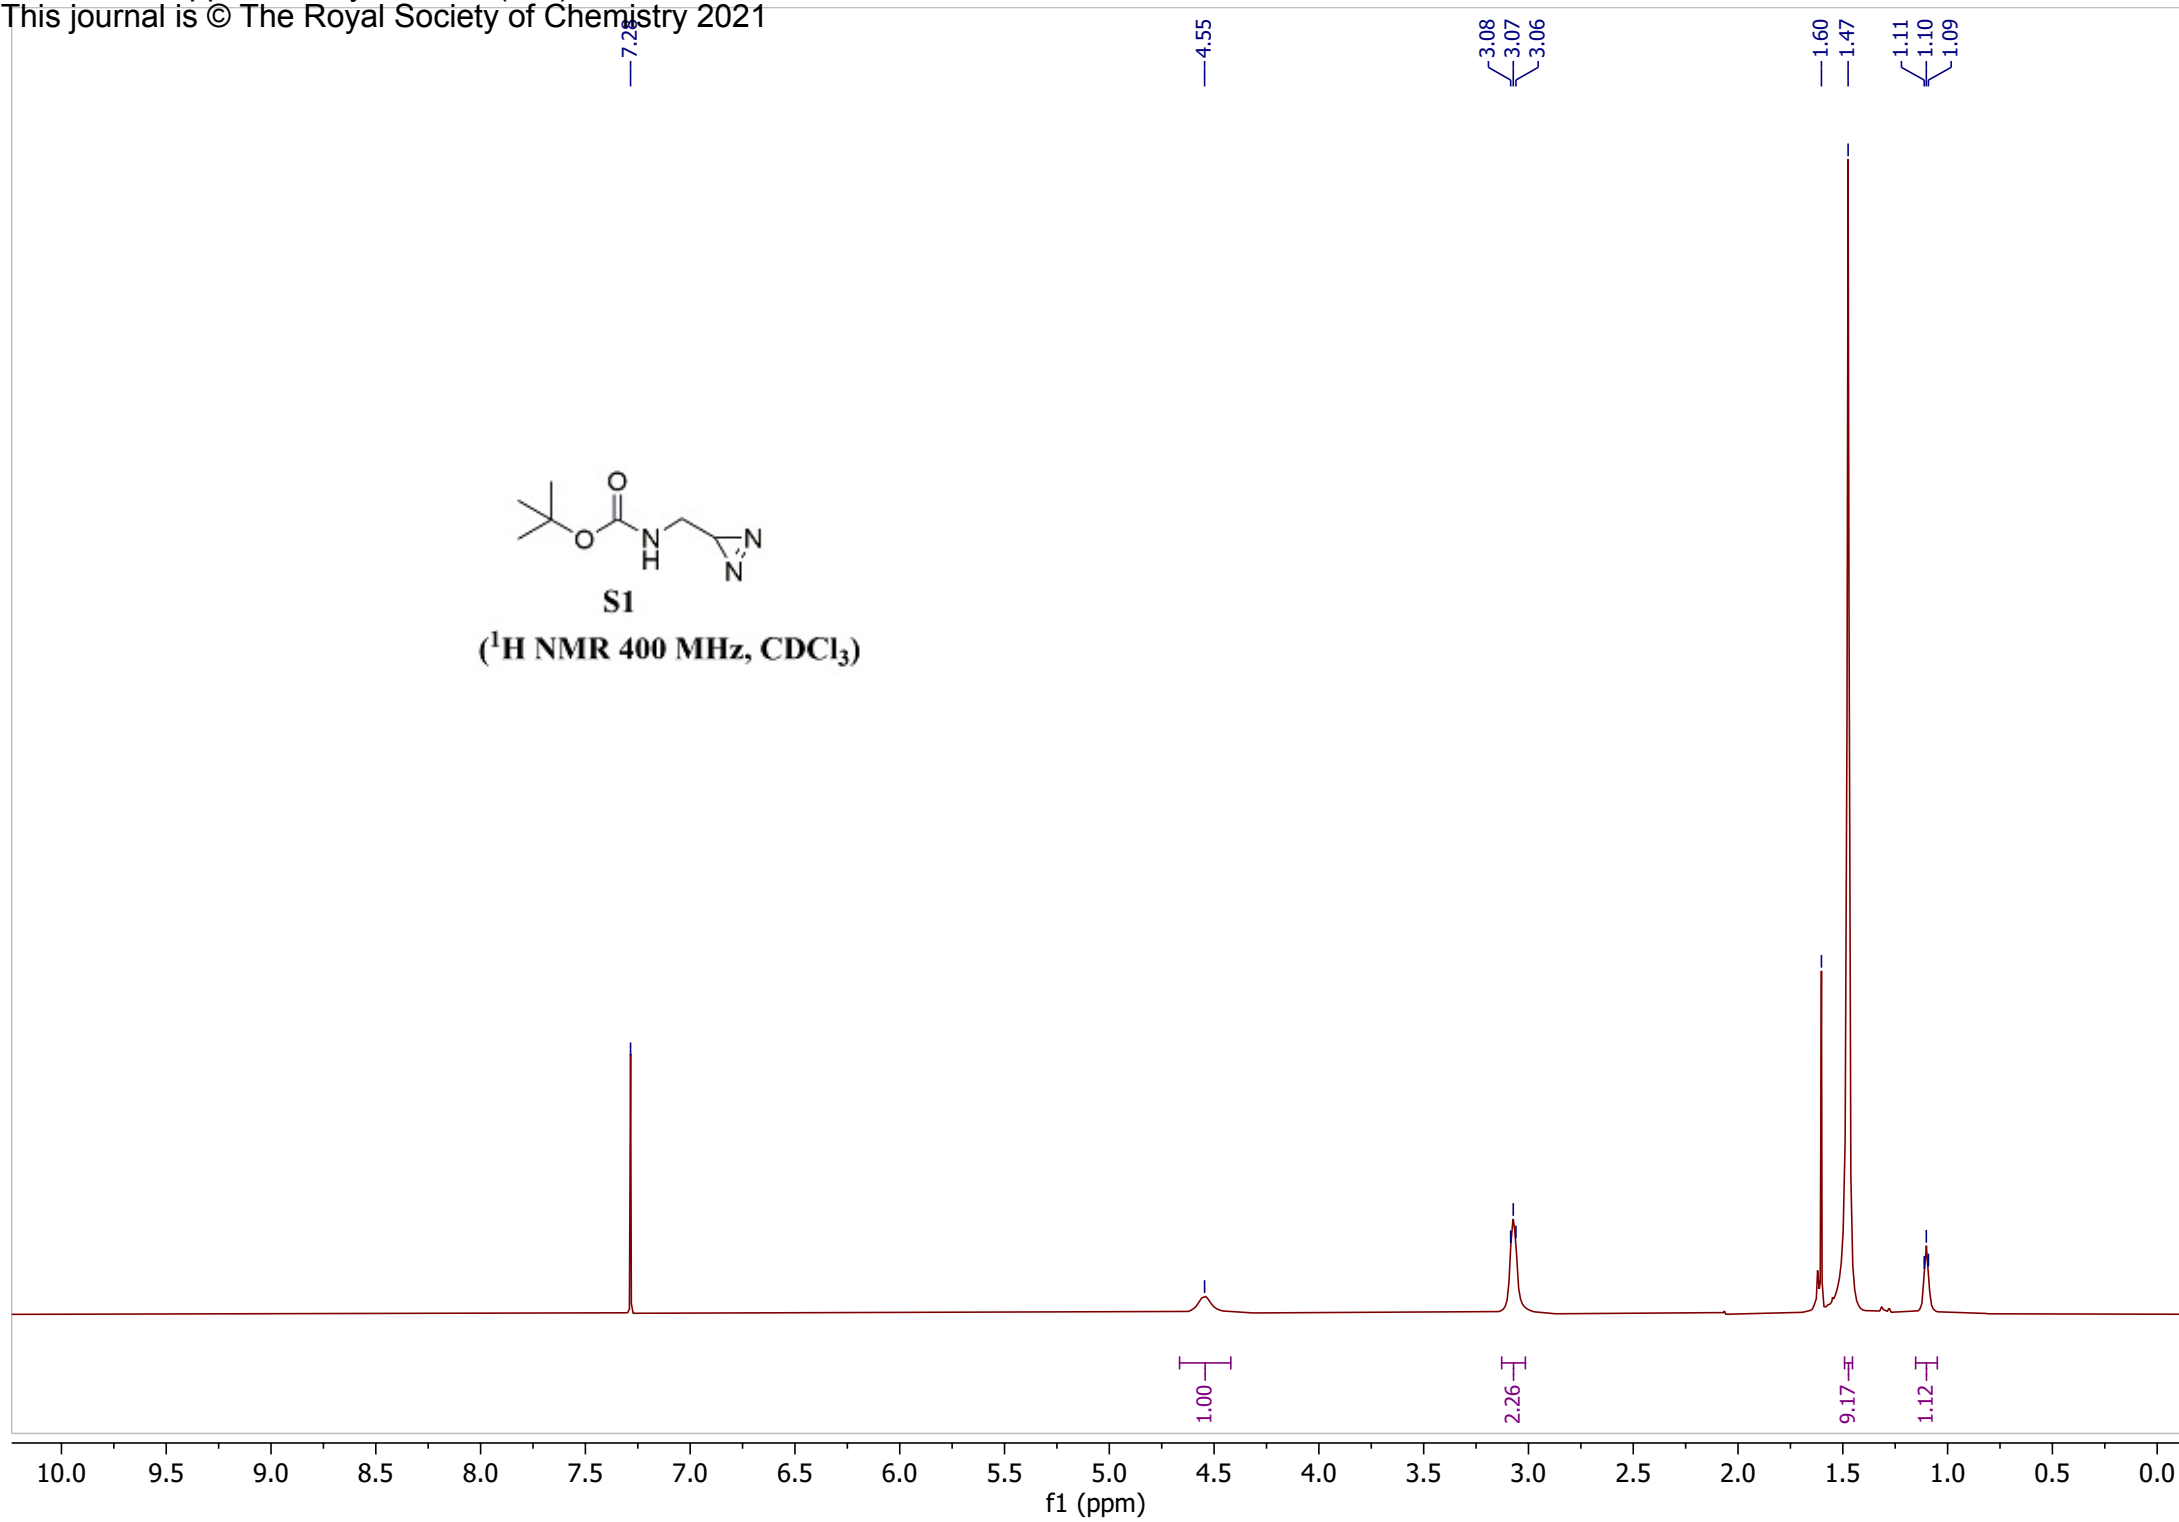

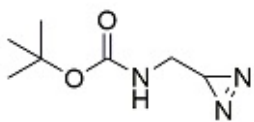

S1

(<sup>13</sup>C NMR 151 MHz, CDCl<sub>3</sub>)

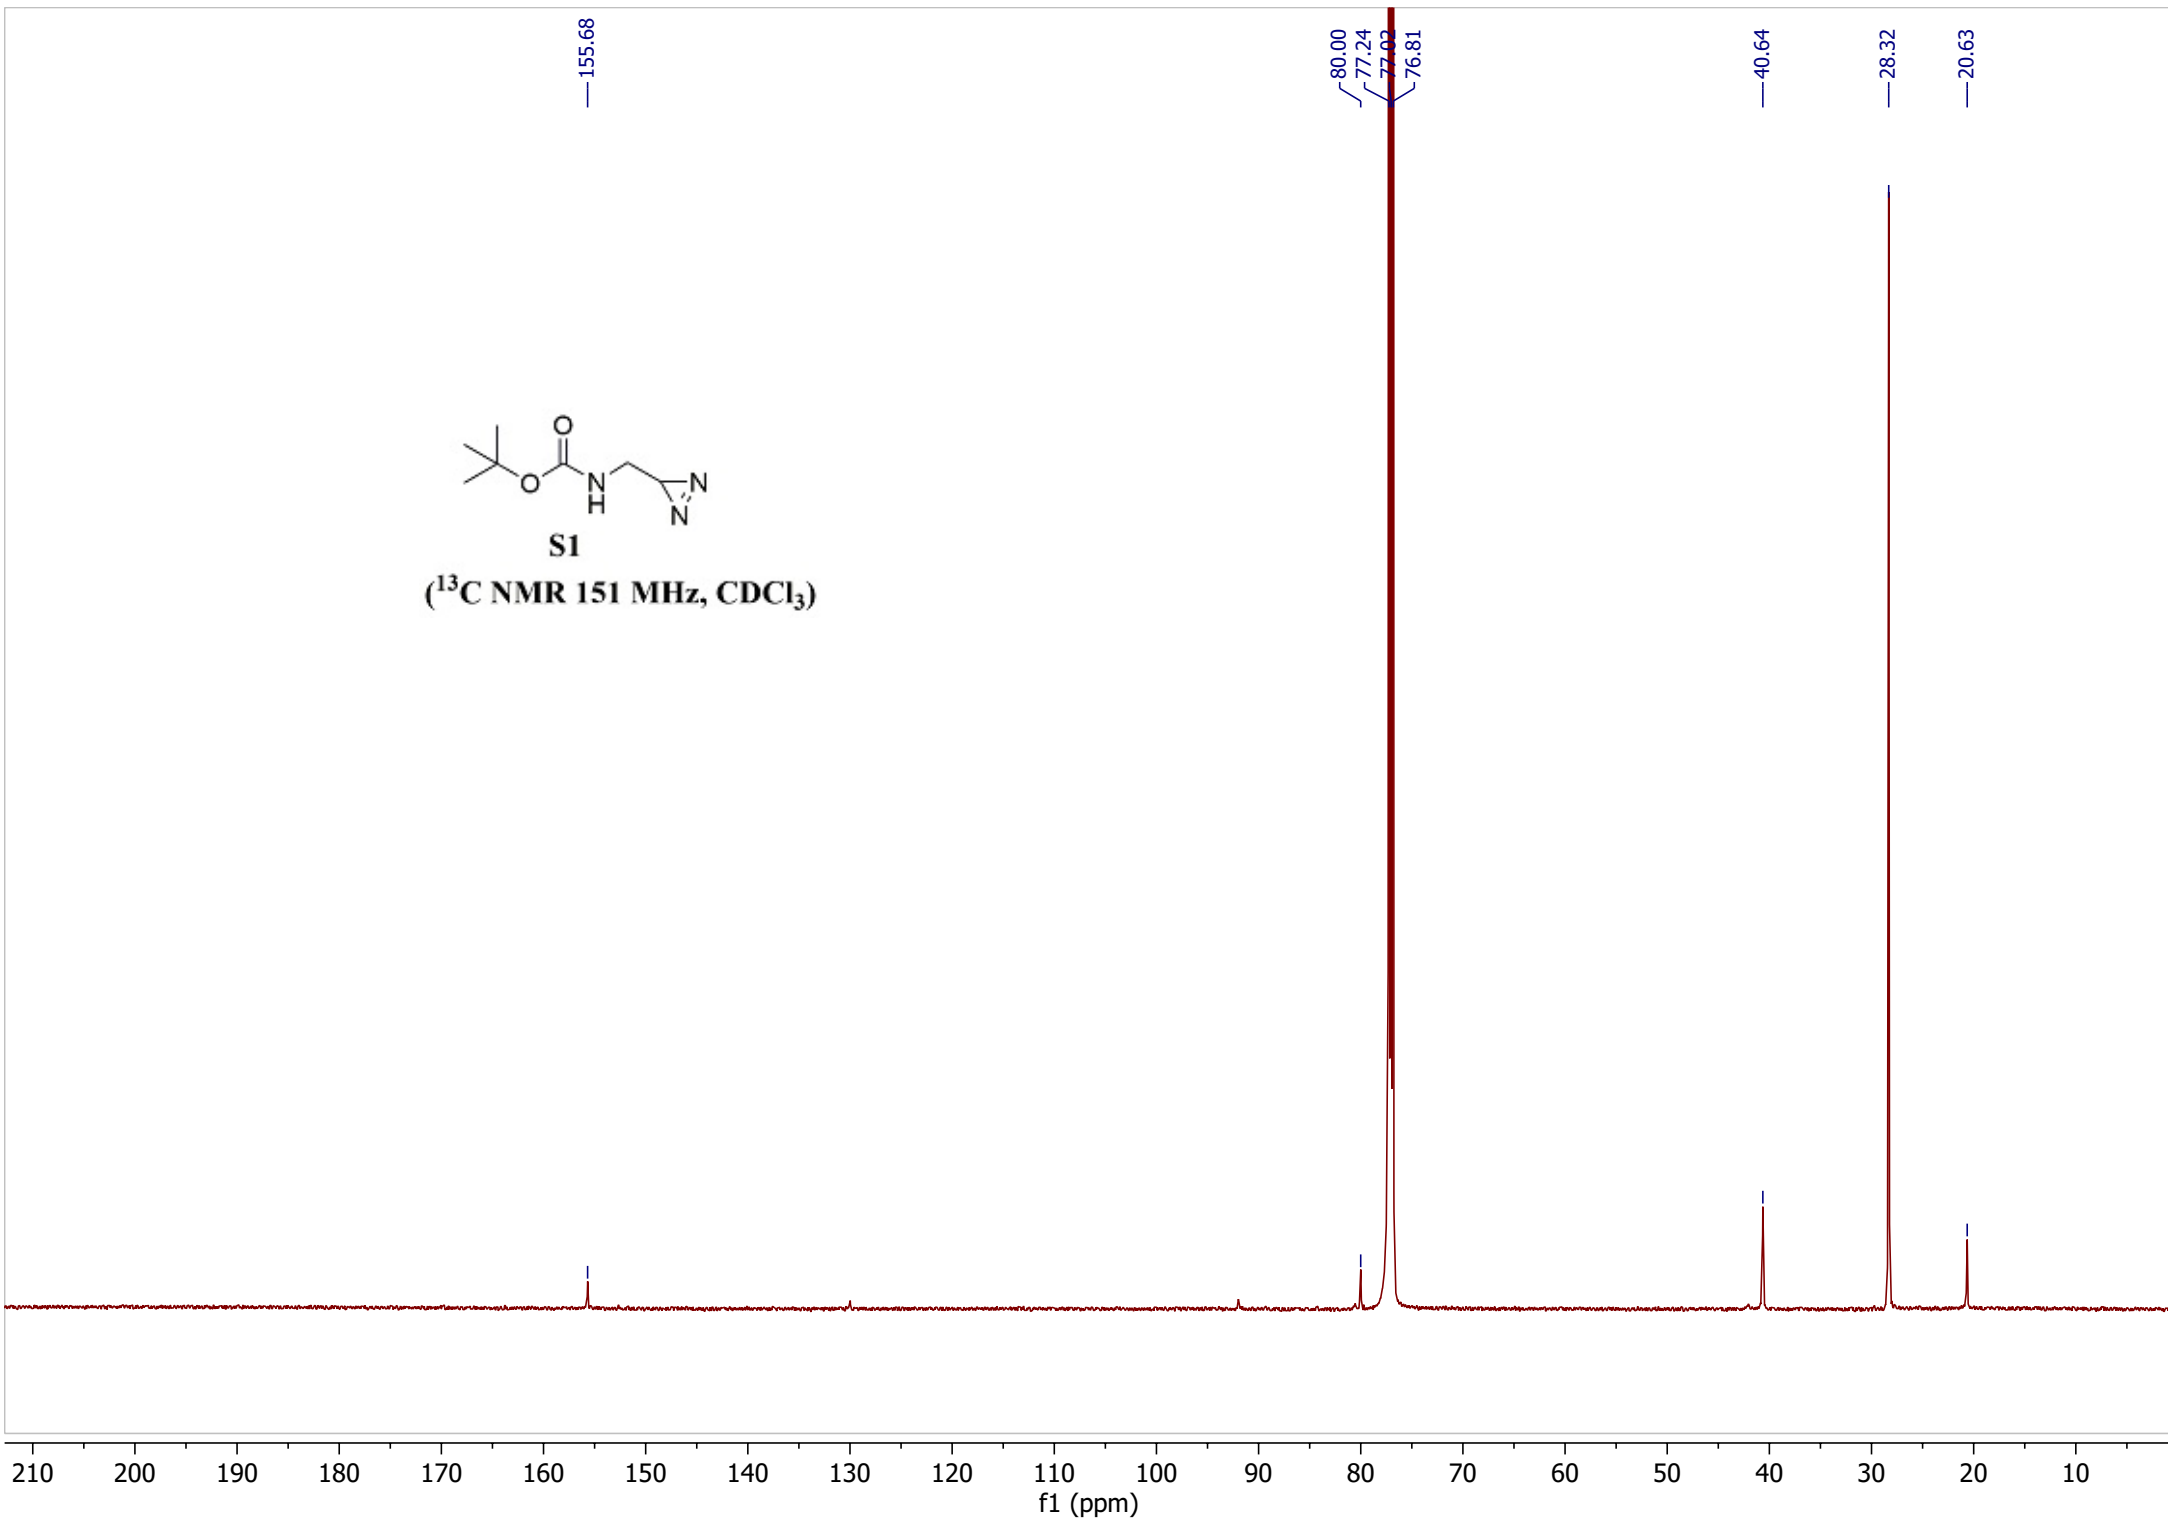

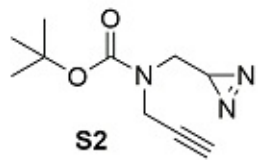

S2

(<sup>1</sup>H NMR 400 MHz, CDCl<sub>3</sub>)

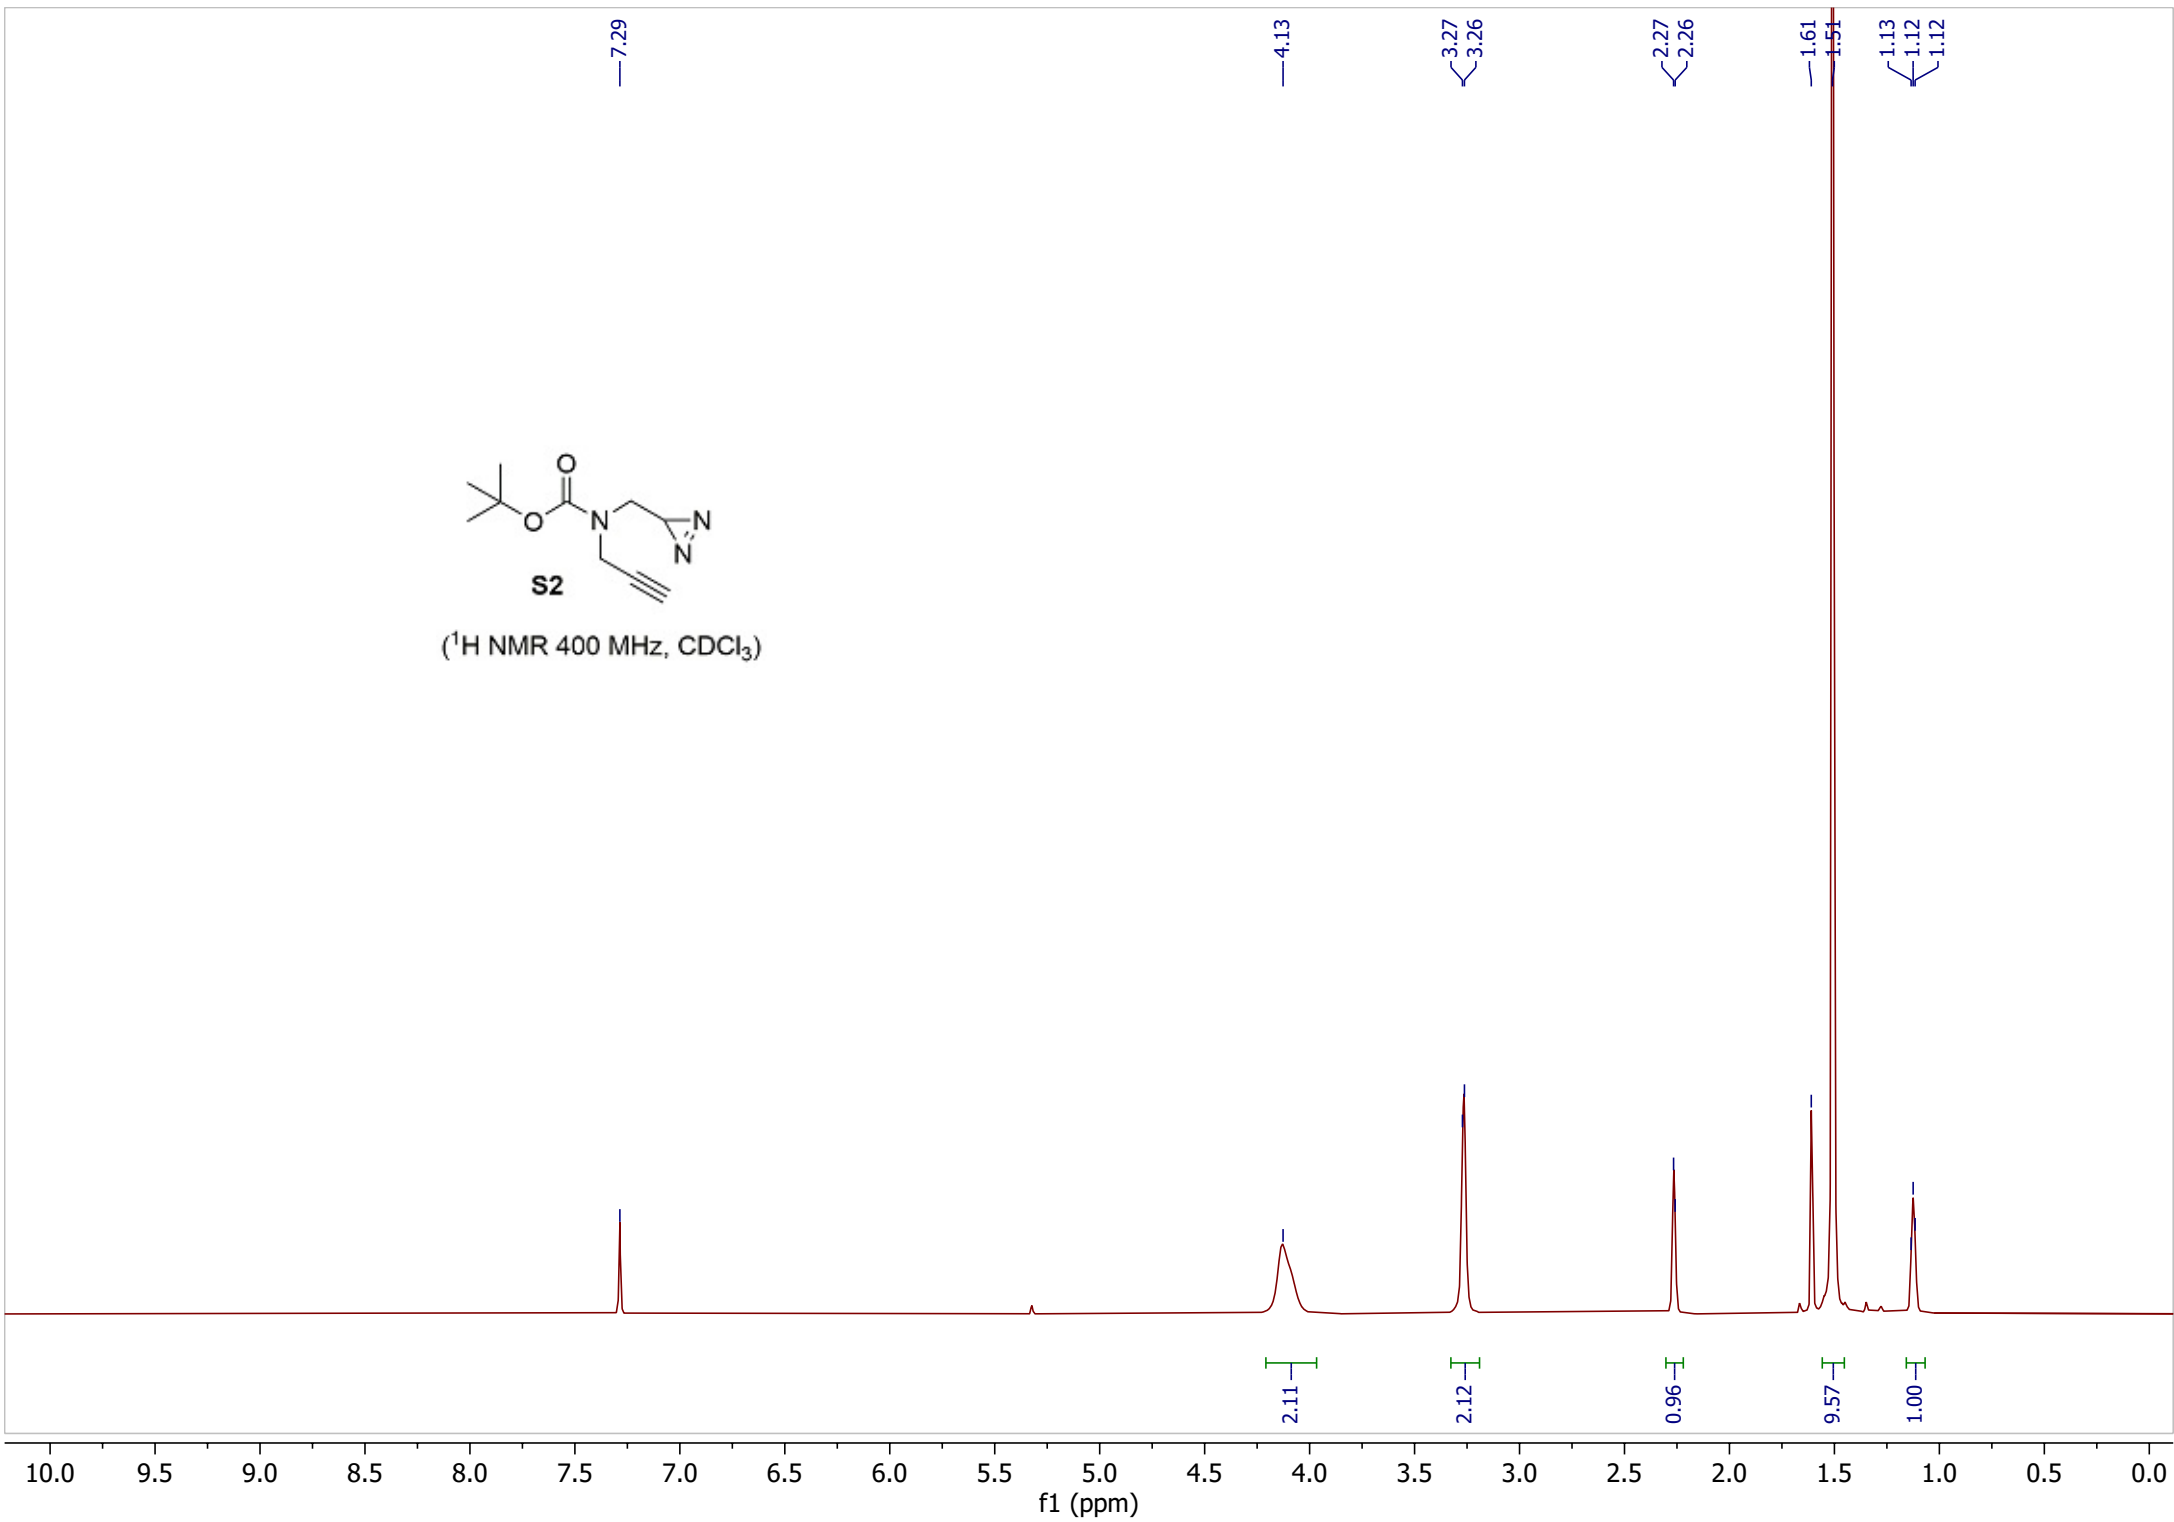

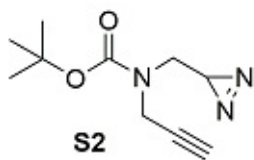

(<sup>13</sup>C NMR 151 MHz, CDCl<sub>3</sub>)

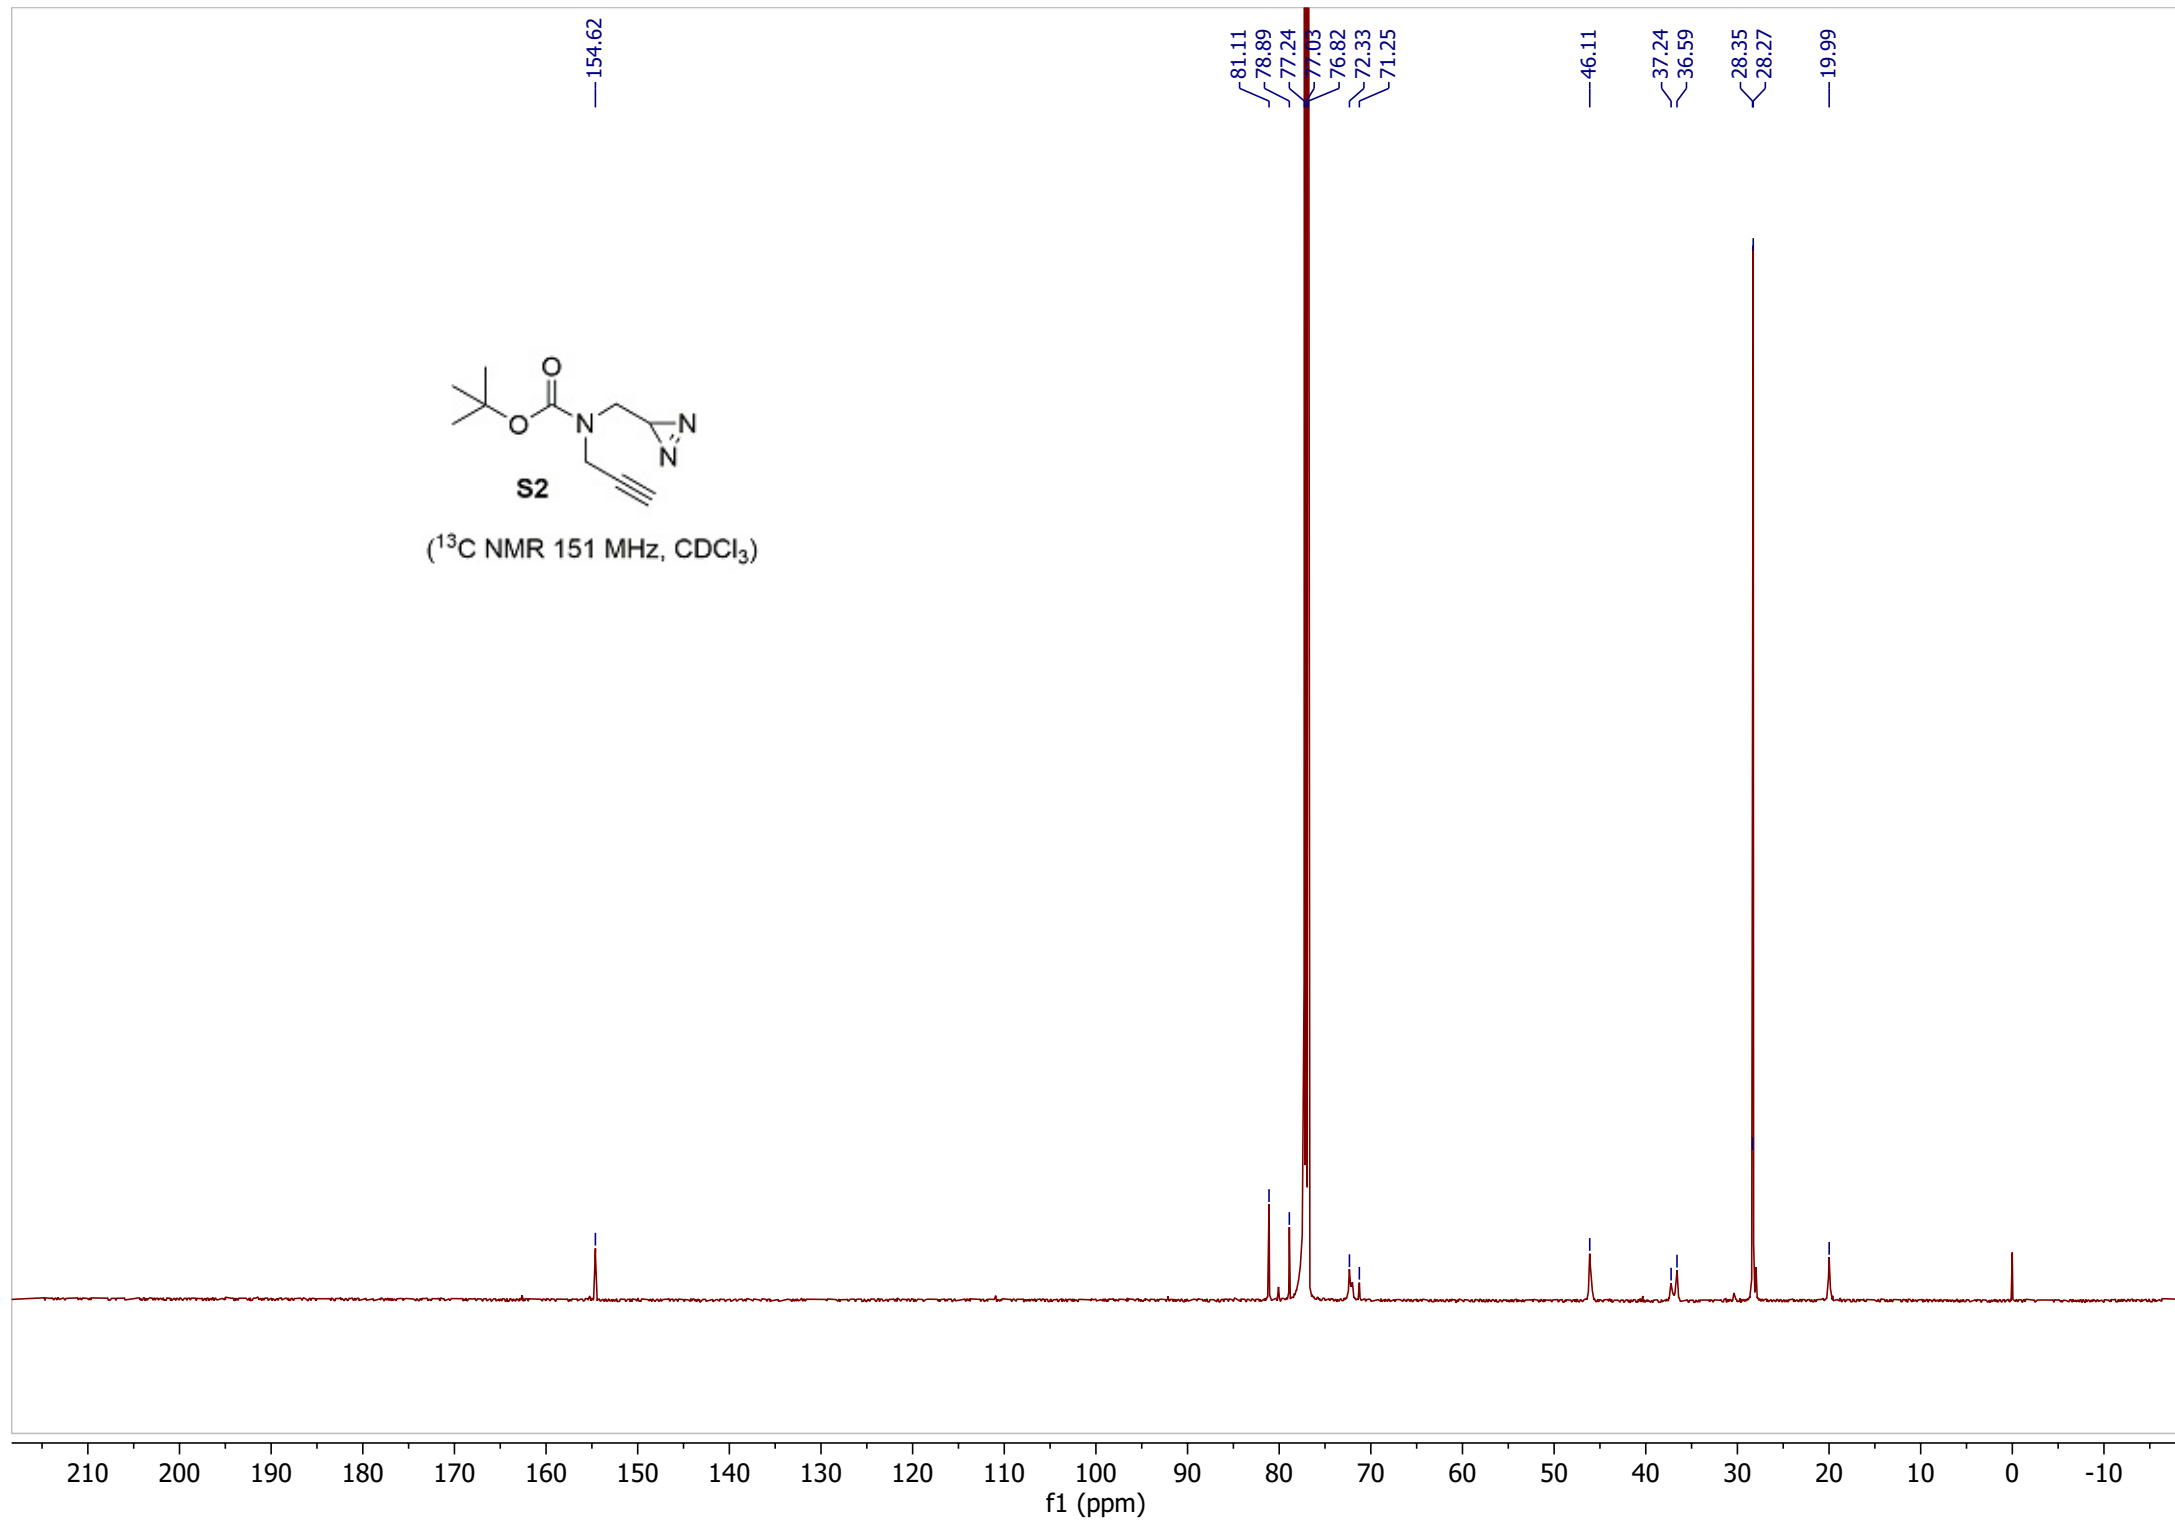

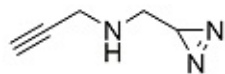

**Tm**

(<sup>1</sup>H NMR 400 MHz, CDCl<sub>3</sub>)

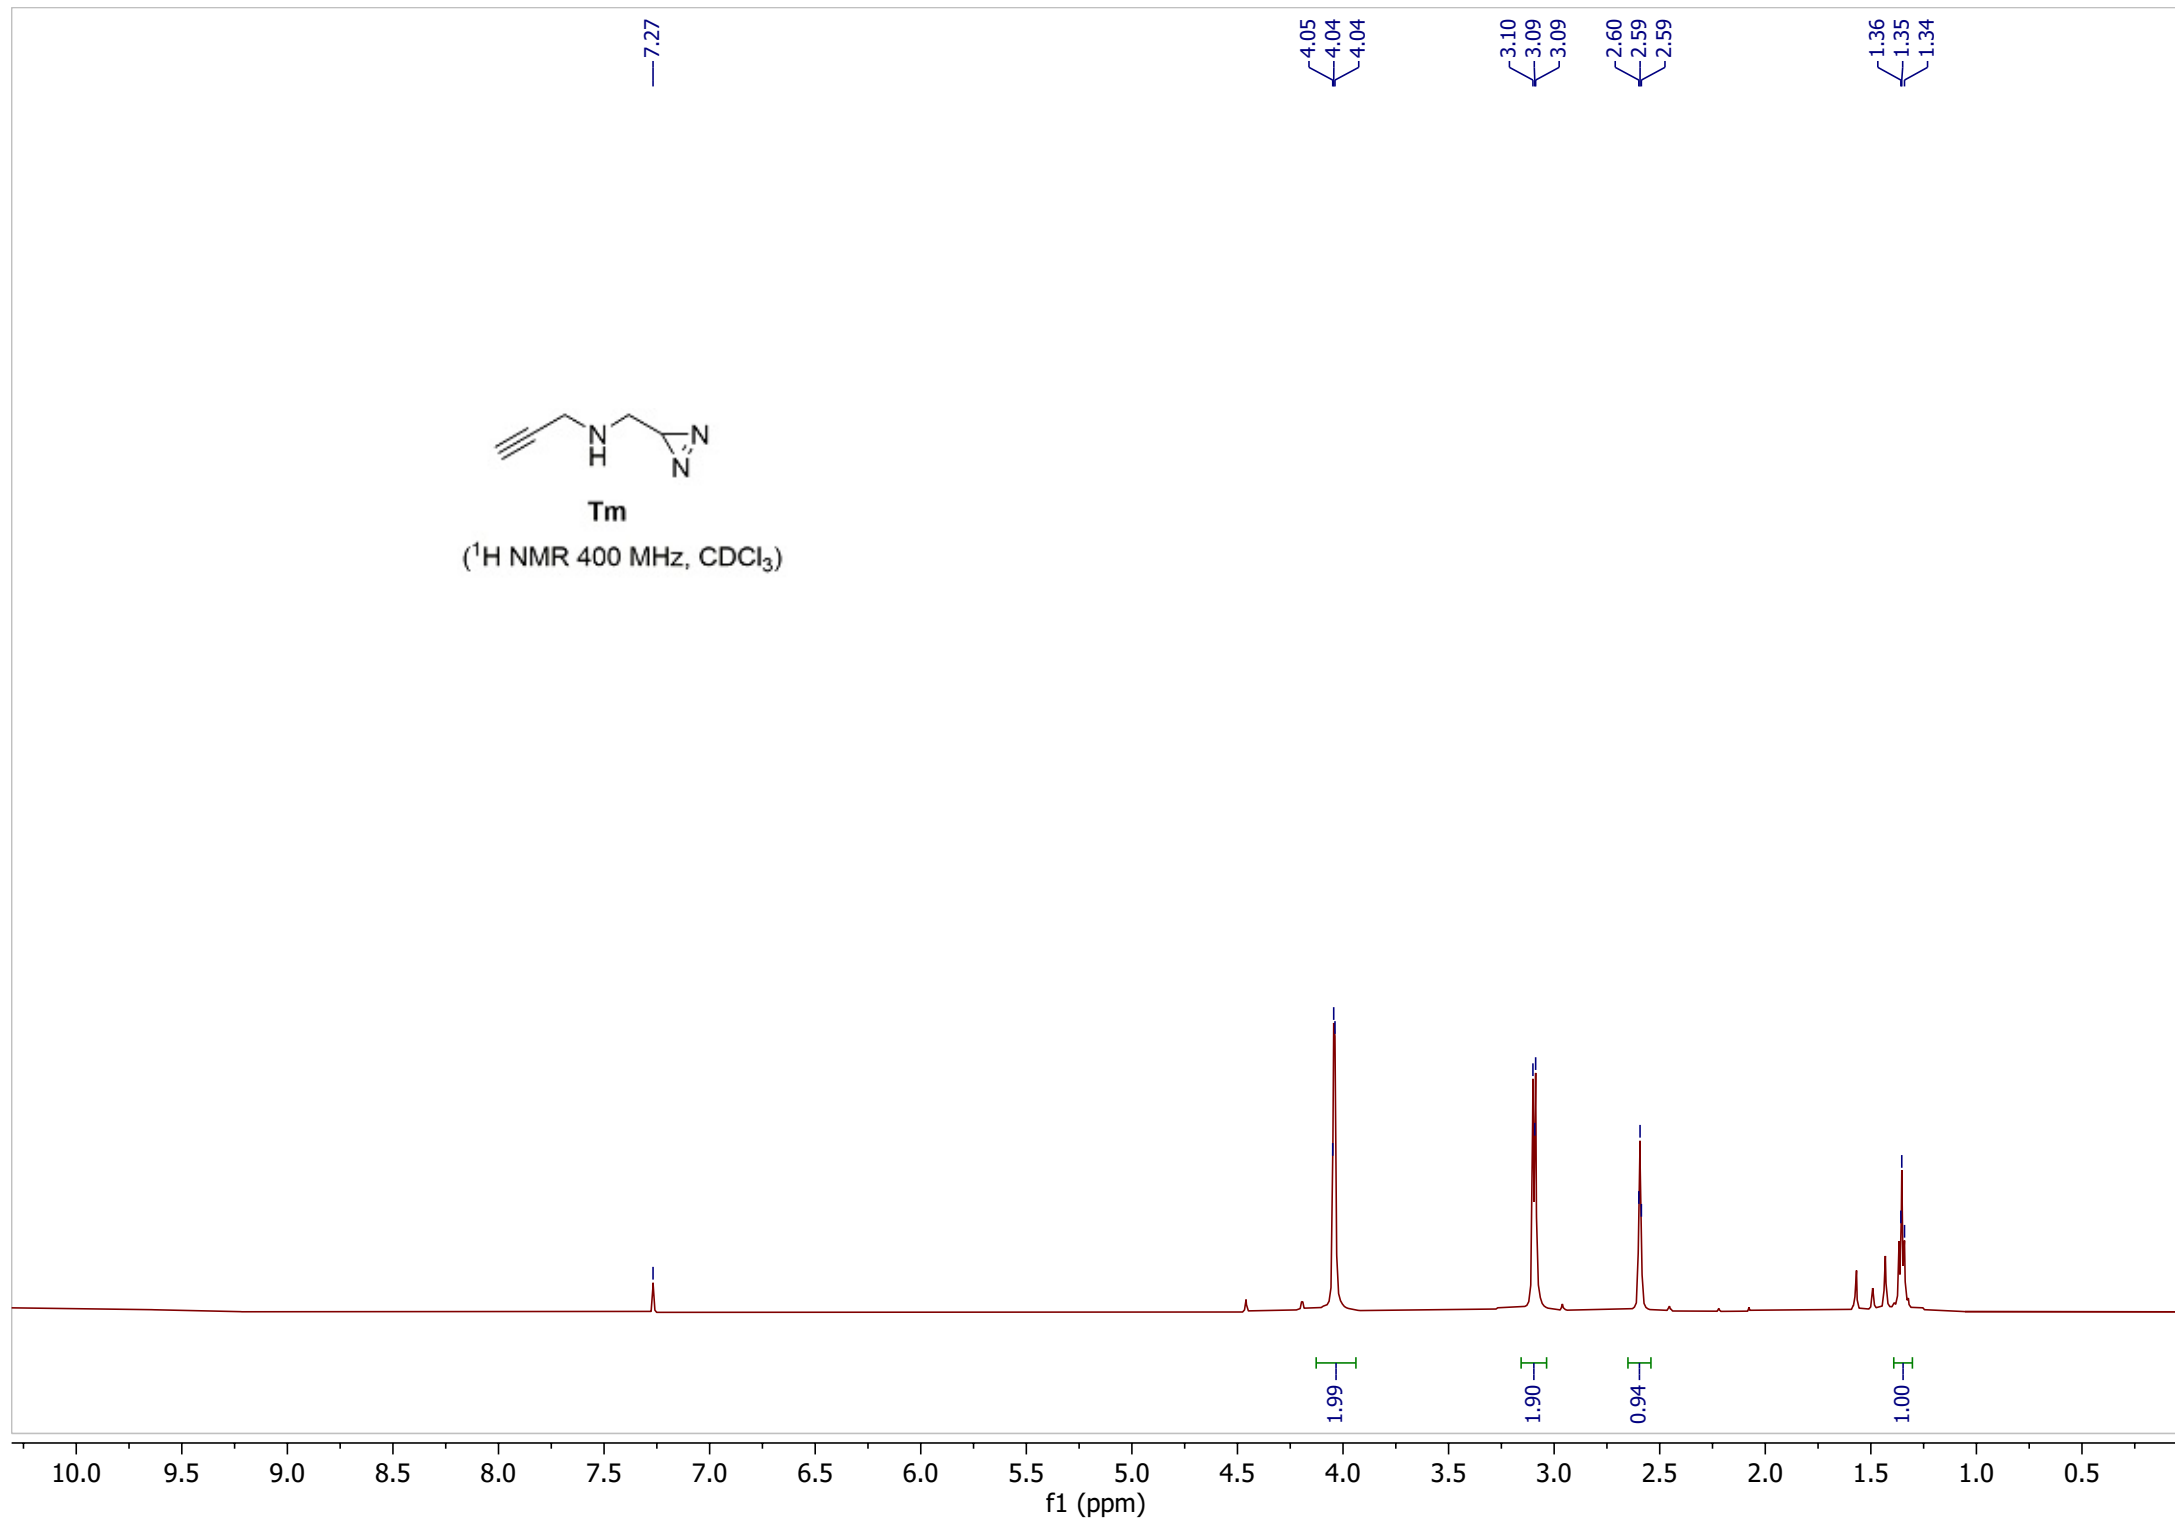

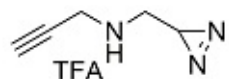

TFA

**Tm**

<sup>13</sup>C NMR (101 MHz, CDCl<sub>3</sub>)

162.31  
161.92  
161.54  
161.15

119.78  
116.92  
114.05  
111.19

78.70  
77.33  
77.02  
76.70  
71.60

47.56

36.37

16.09

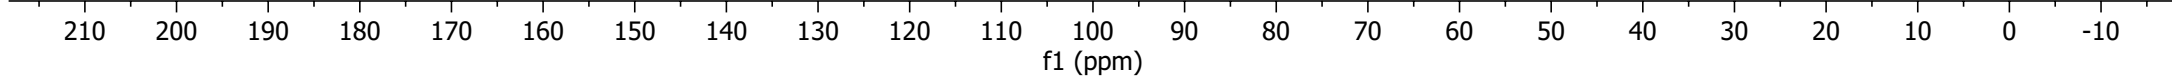

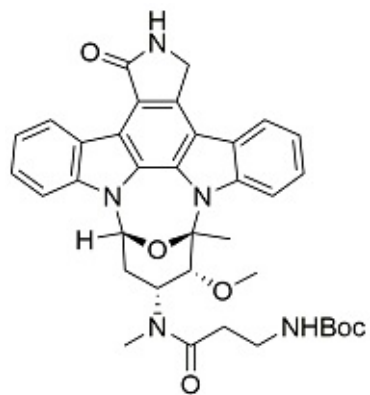

**S3**

<sup>1</sup>H NMR (600 MHz, CDCl<sub>3</sub>)

9.36  
9.35  
7.81  
7.81  
7.80  
7.80  
7.65  
7.63  
7.41  
7.40  
7.38  
7.37  
7.37  
7.36  
7.36  
7.35  
7.34  
7.34  
7.30  
7.29  
7.28  
7.26  
7.25  
7.24  
7.19  
7.14  
7.13  
6.77  
6.59  
6.58  
6.58  
6.56

5.28  
5.27  
5.26  
5.12  
5.12  
5.11  
5.11  
5.10  
5.10  
5.09  
5.09  
4.94  
4.91  
4.90  
4.88

3.91  
3.90  
3.49  
3.49  
3.45  
3.44  
3.43  
3.42  
3.41  
3.40  
3.40  
3.39  
3.39  
3.38  
3.37  
3.36  
3.36  
2.72  
2.48  
2.47  
2.46  
2.45  
2.39  
2.36  
1.38

1.00

1.01

1.02

0.95

1.13

1.06

0.99

1.01

0.85

0.98

0.90

1.00

2.03

0.94

2.03

3.02

3.60

3.05

3.09

8.97

10.0 9.5 9.0 8.5 8.0 7.5 7.0 6.5 6.0 5.5 5.0 4.5 4.0 3.5 3.0 2.5 2.0 1.5 1.0 0.5

f1 (ppm)

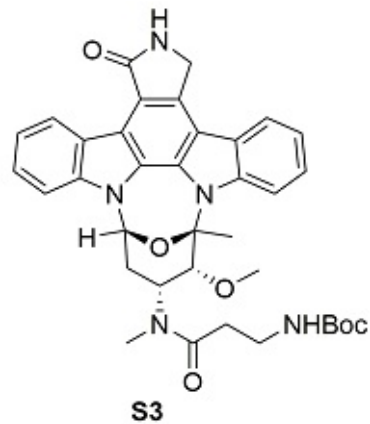

$^{13}\text{C}$  NMR (151 MHz,  $\text{CDCl}_3$ )

172.29  
171.55

154.95

137.51  
135.44  
131.44  
129.39  
125.64  
125.19  
124.38  
123.92  
123.58  
122.52  
120.41  
119.46  
119.00  
118.02  
115.17  
113.47  
111.25  
106.62

93.50

83.73

81.36

78.21

76.18  $\text{CDCl}_3$

75.96  $\text{CDCl}_3$

75.75  $\text{CDCl}_3$

59.35

54.18

47.44

44.91

35.17

33.33

30.11

28.63

28.05

27.38

26.96

210 200 190 180 170 160 150 140 130 120 110 100 90 80 70 60 50 40 30 20 10 0 -10

f1 (ppm)



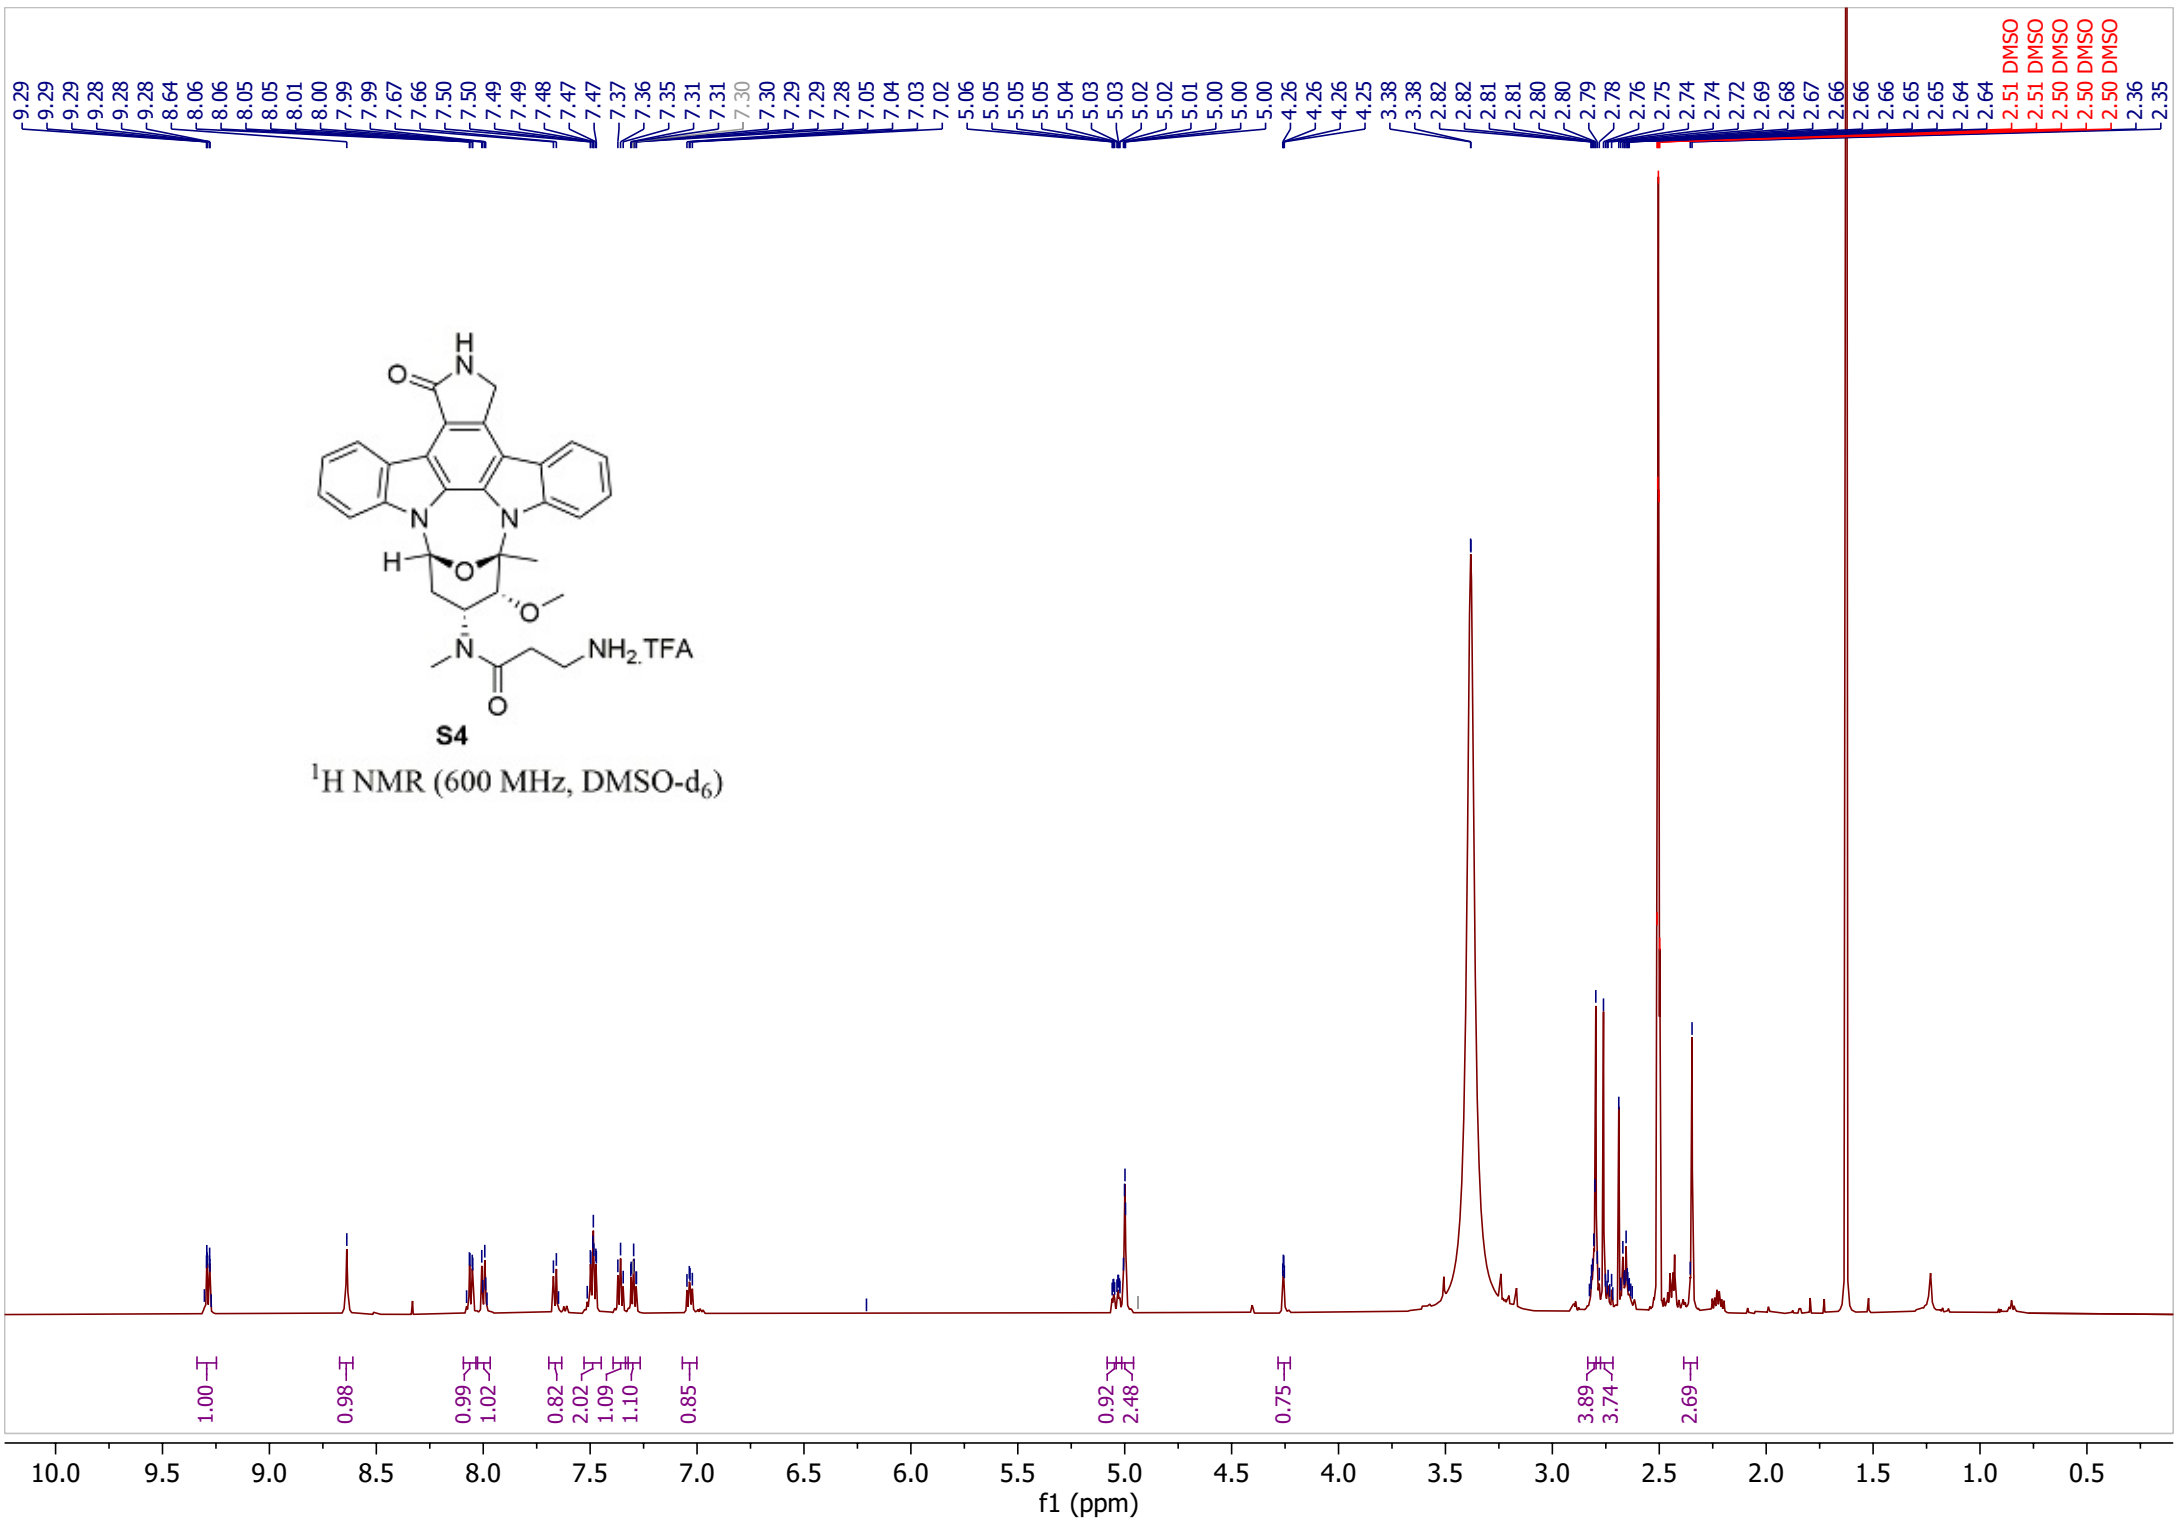

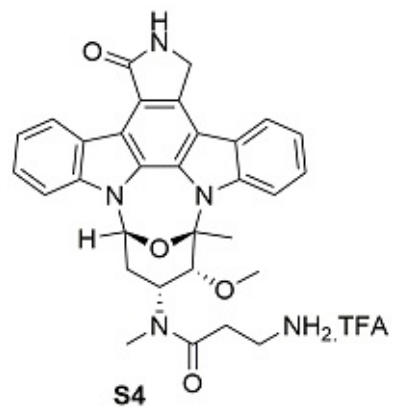

$^{13}\text{C}$  NMR (151 MHz, DMSO-d<sub>6</sub>)

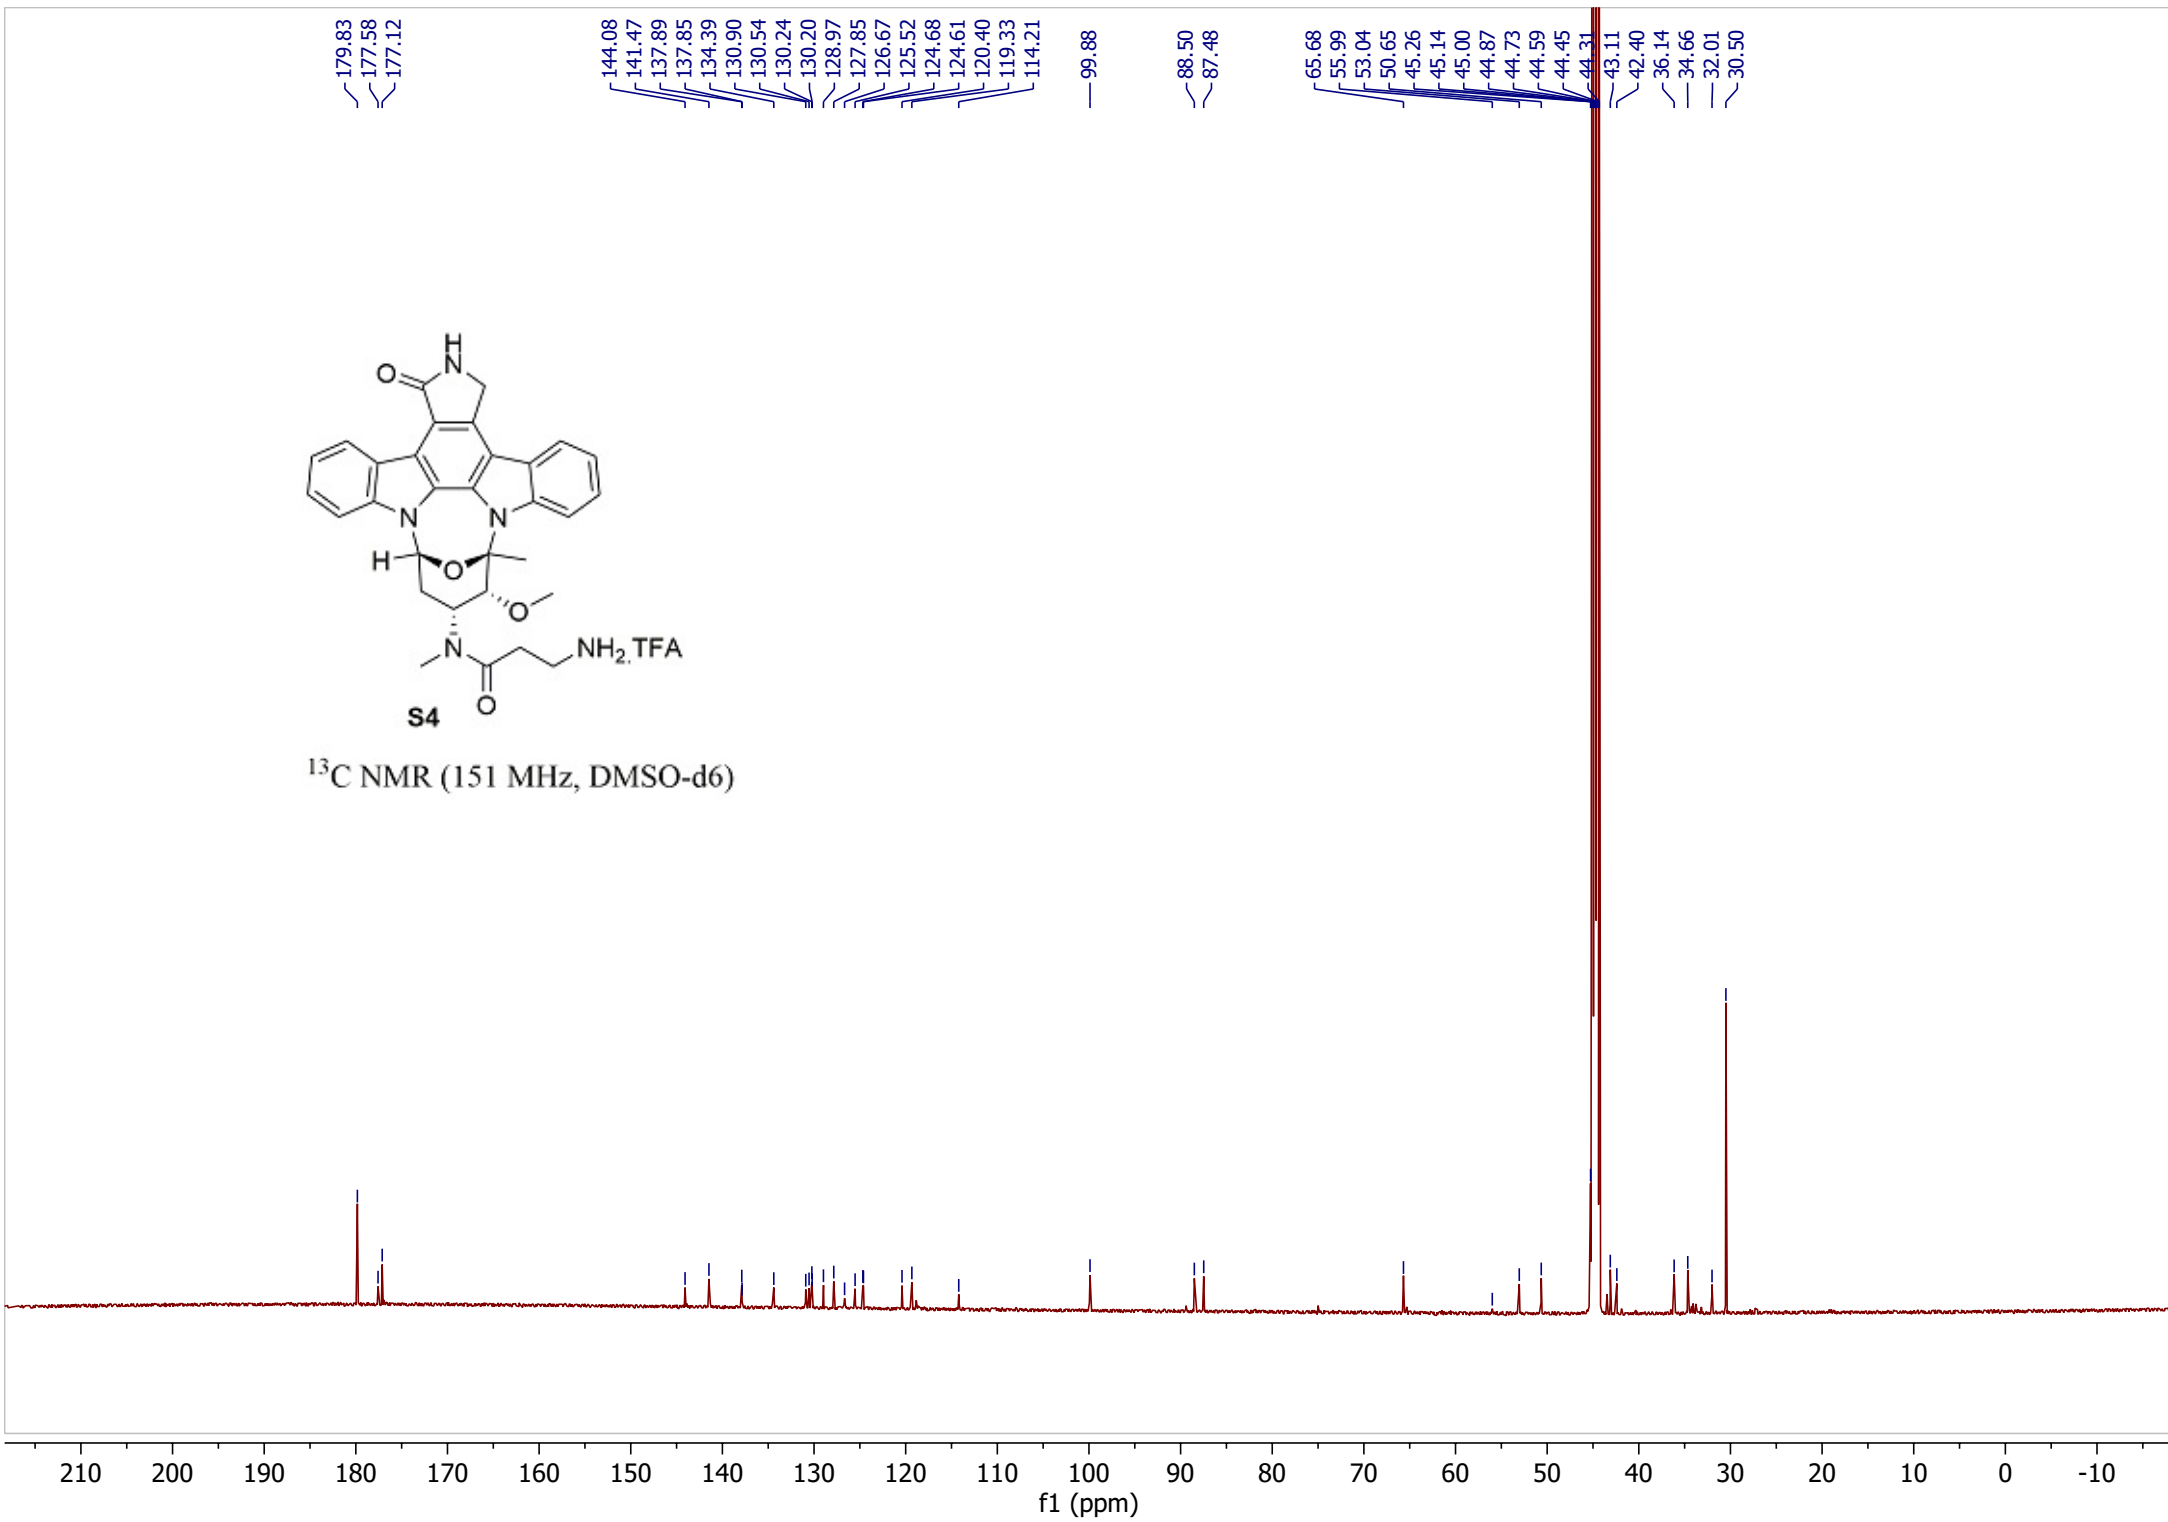

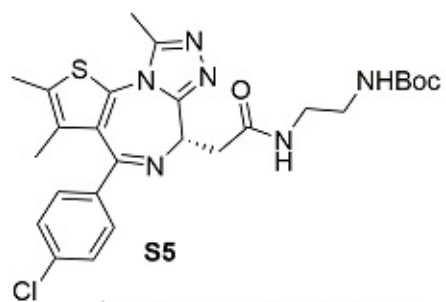

<sup>1</sup>H NMR (400 MHz, CDCl<sub>3</sub>)

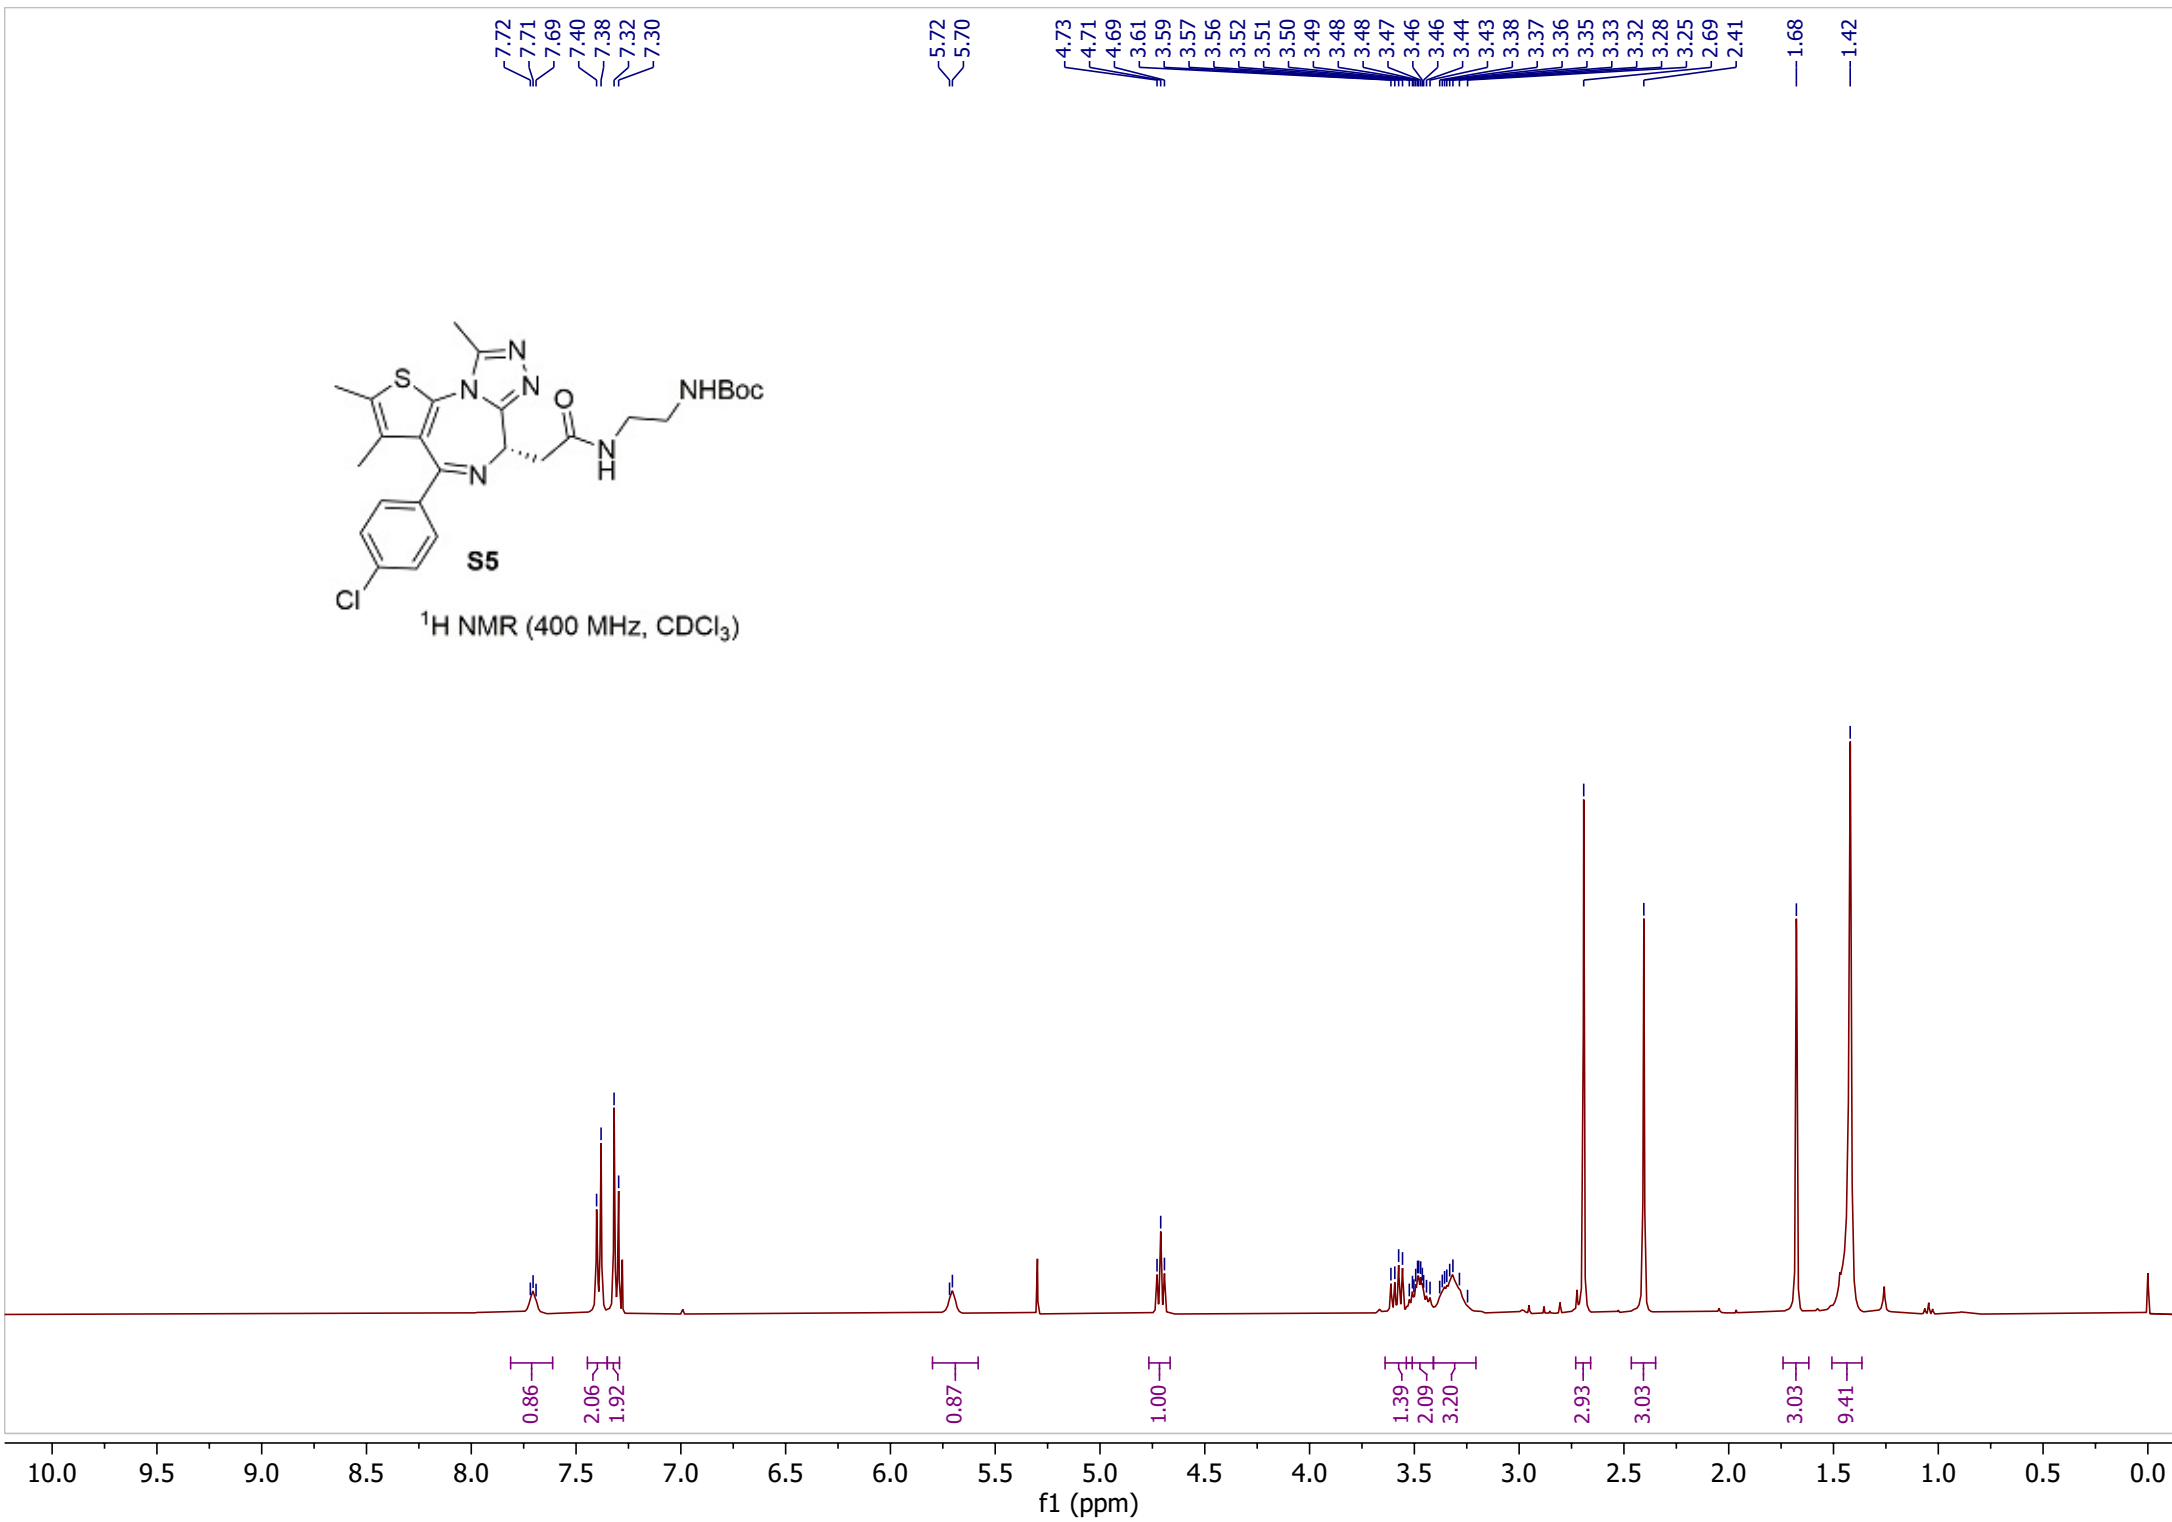

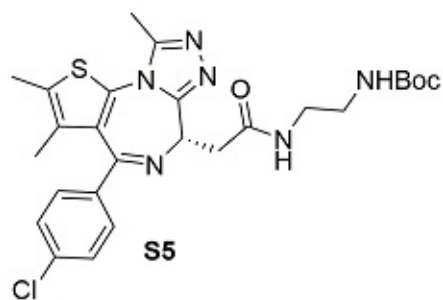

<sup>13</sup>C NMR (151 MHz, CDCl<sub>3</sub>)

171.08  
163.88  
156.38  
155.80  
149.94  
136.75  
136.56  
132.00  
130.98  
130.90  
130.63  
129.99  
129.89  
128.69

79.13  
77.39  
77.07  
76.75

54.31

40.80  
39.98  
38.93

28.47

14.40  
13.09  
11.82

210 200 190 180 170 160 150 140 130 120 110 100 90 80 70 60 50 40 30 20 10 0 -10

f1 (ppm)

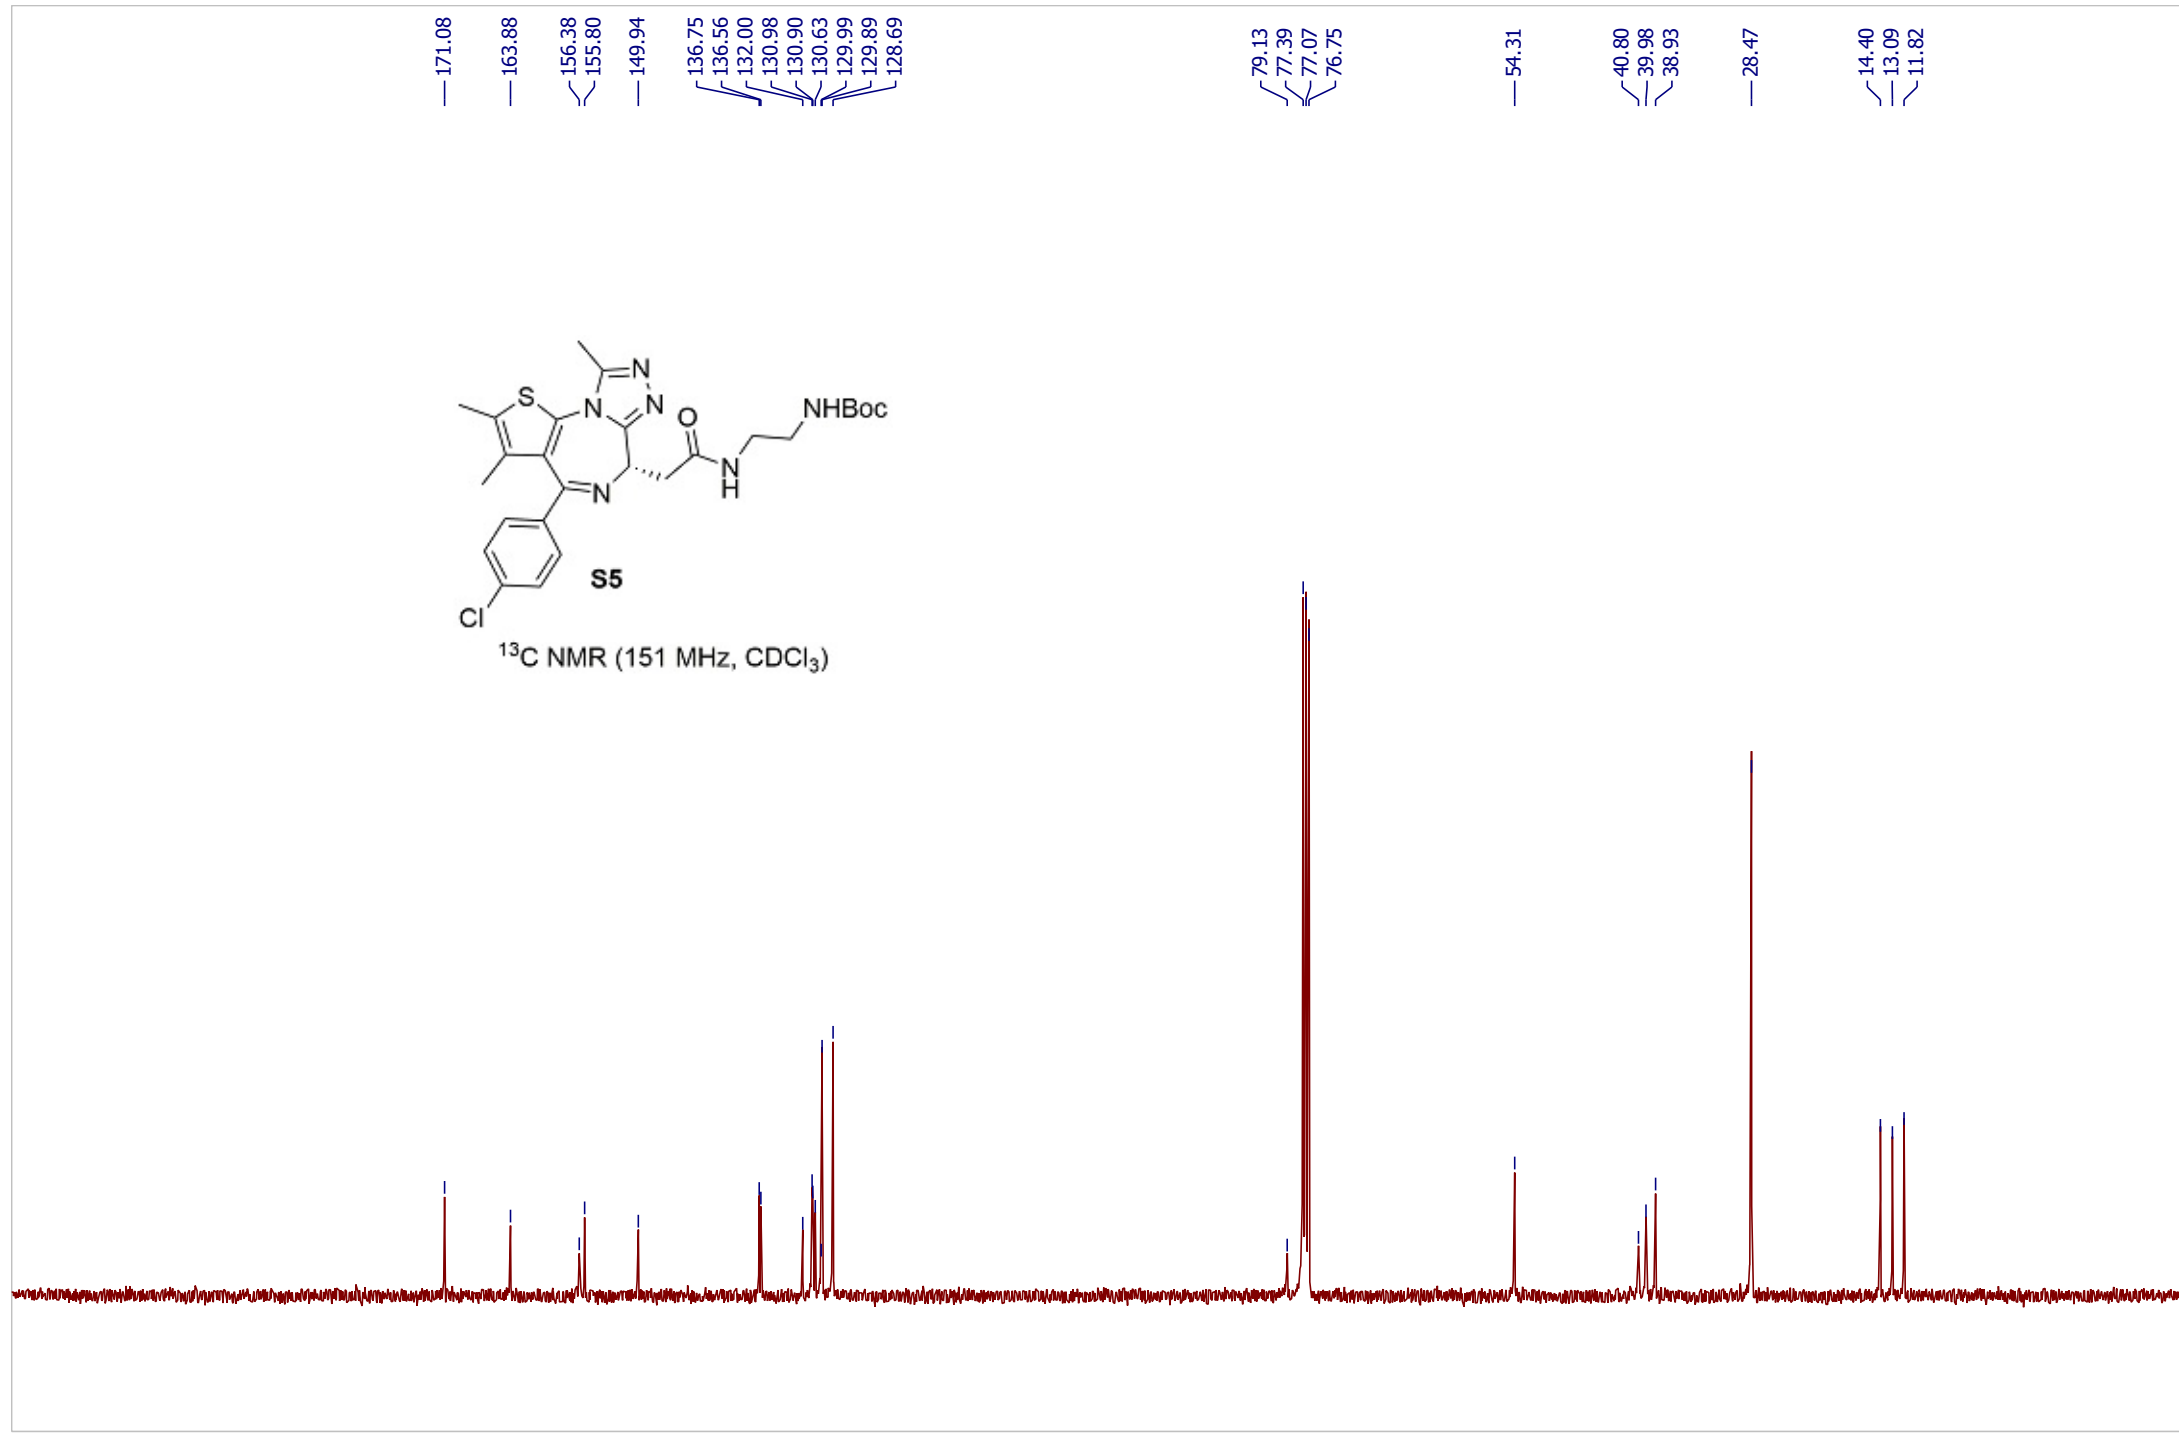

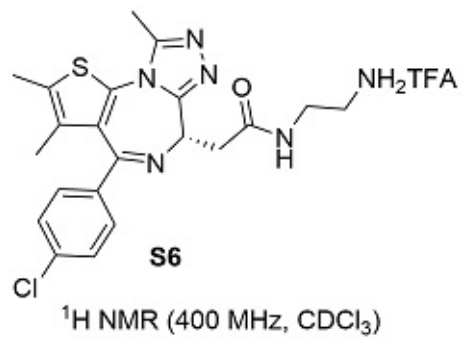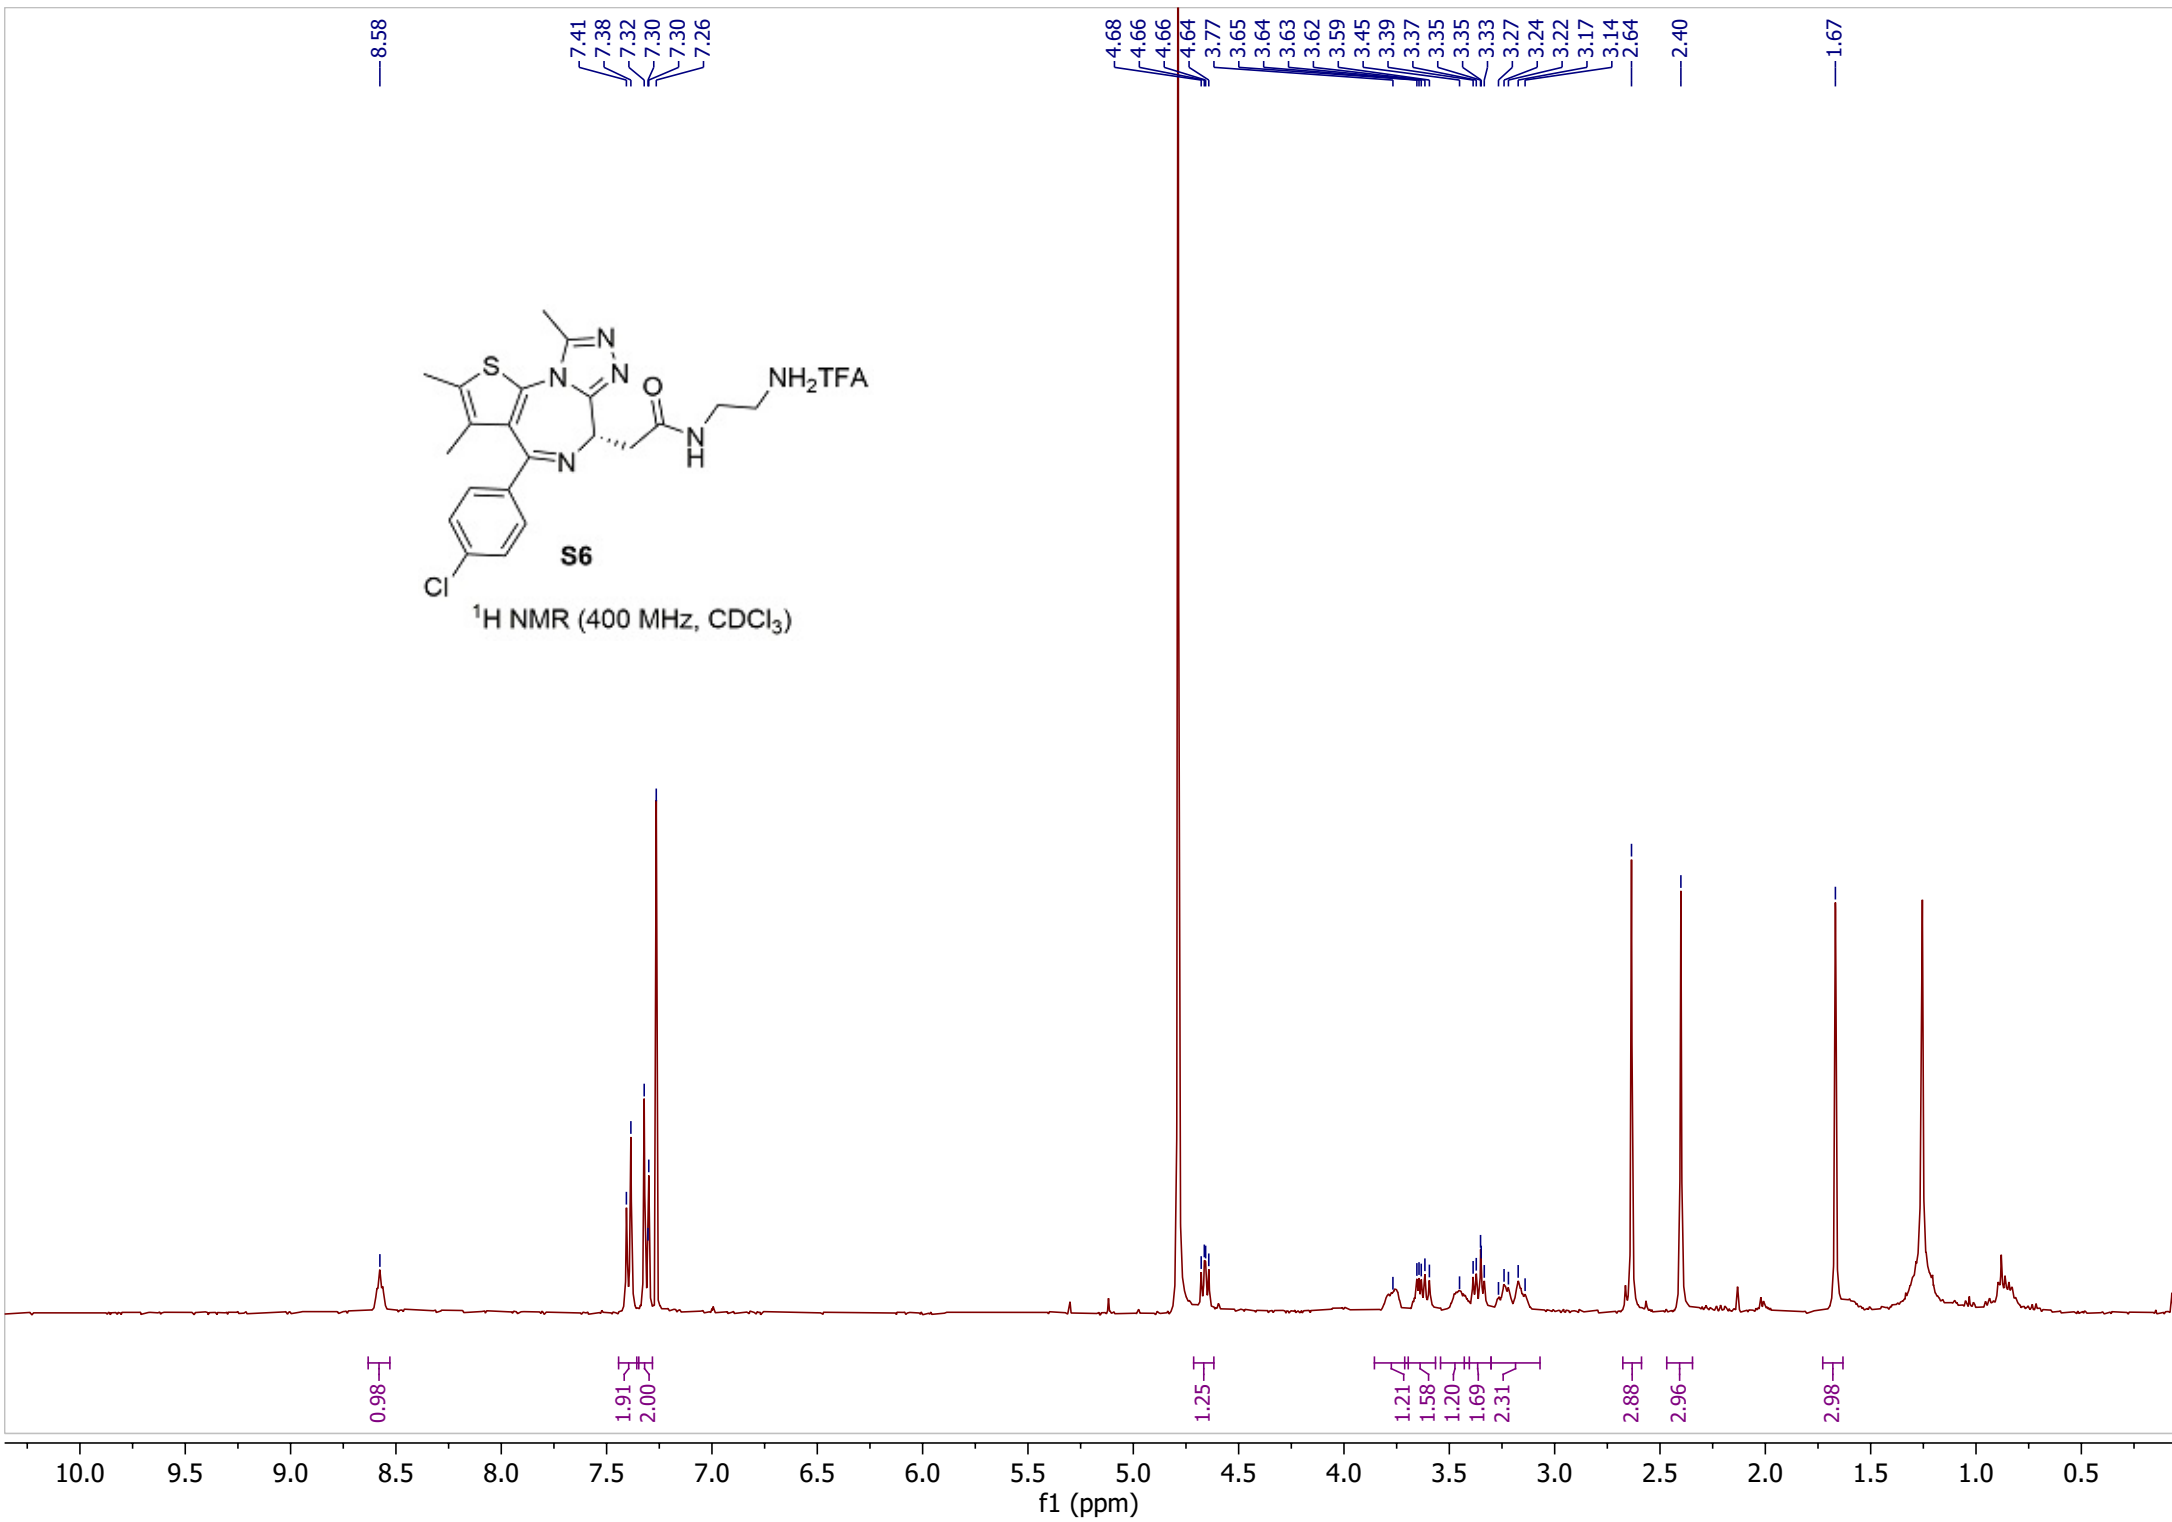

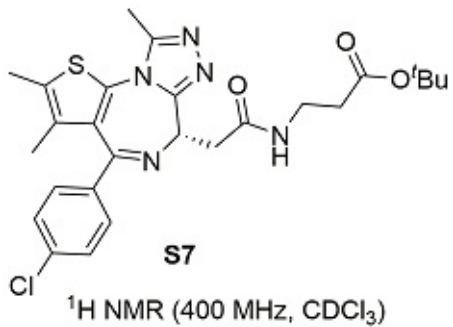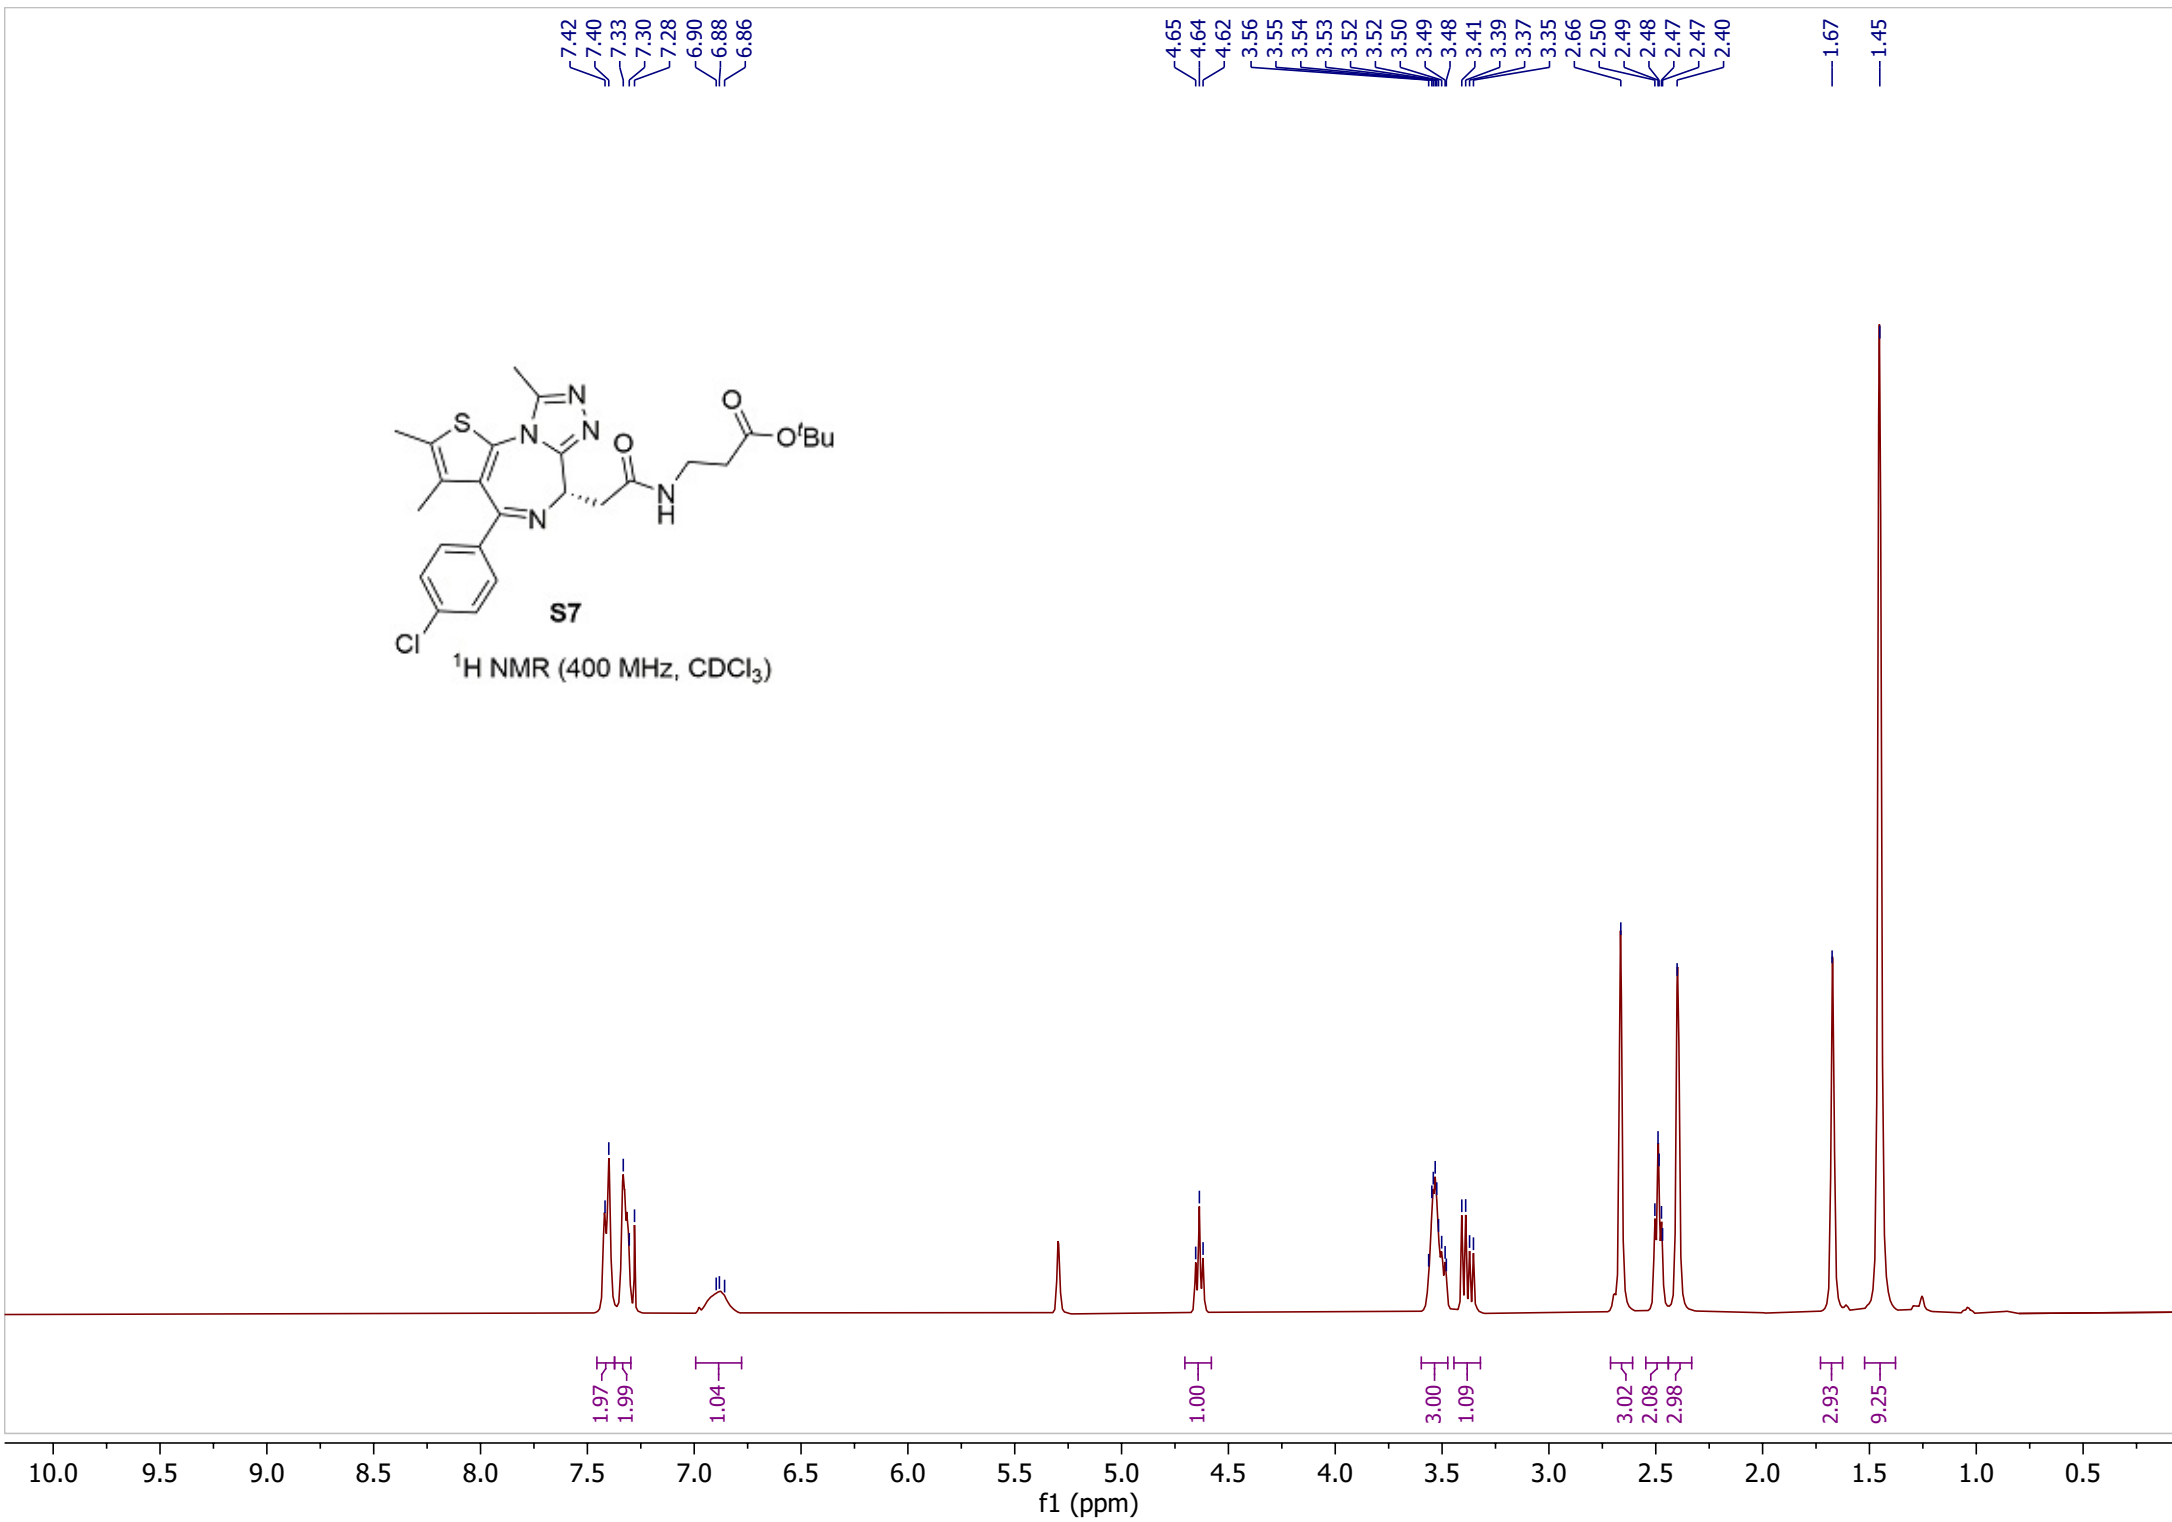

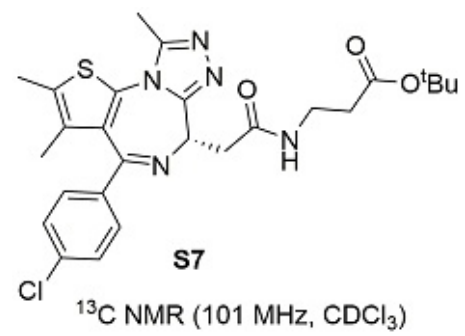

171.47  
170.43  
163.83  
155.68  
149.85  
136.72  
136.64  
132.17  
130.91  
130.74  
130.46  
129.86  
128.69

80.98  
77.40  
77.09  
76.76

54.28

39.20  
35.32  
35.27

28.12

14.40  
13.09  
11.84

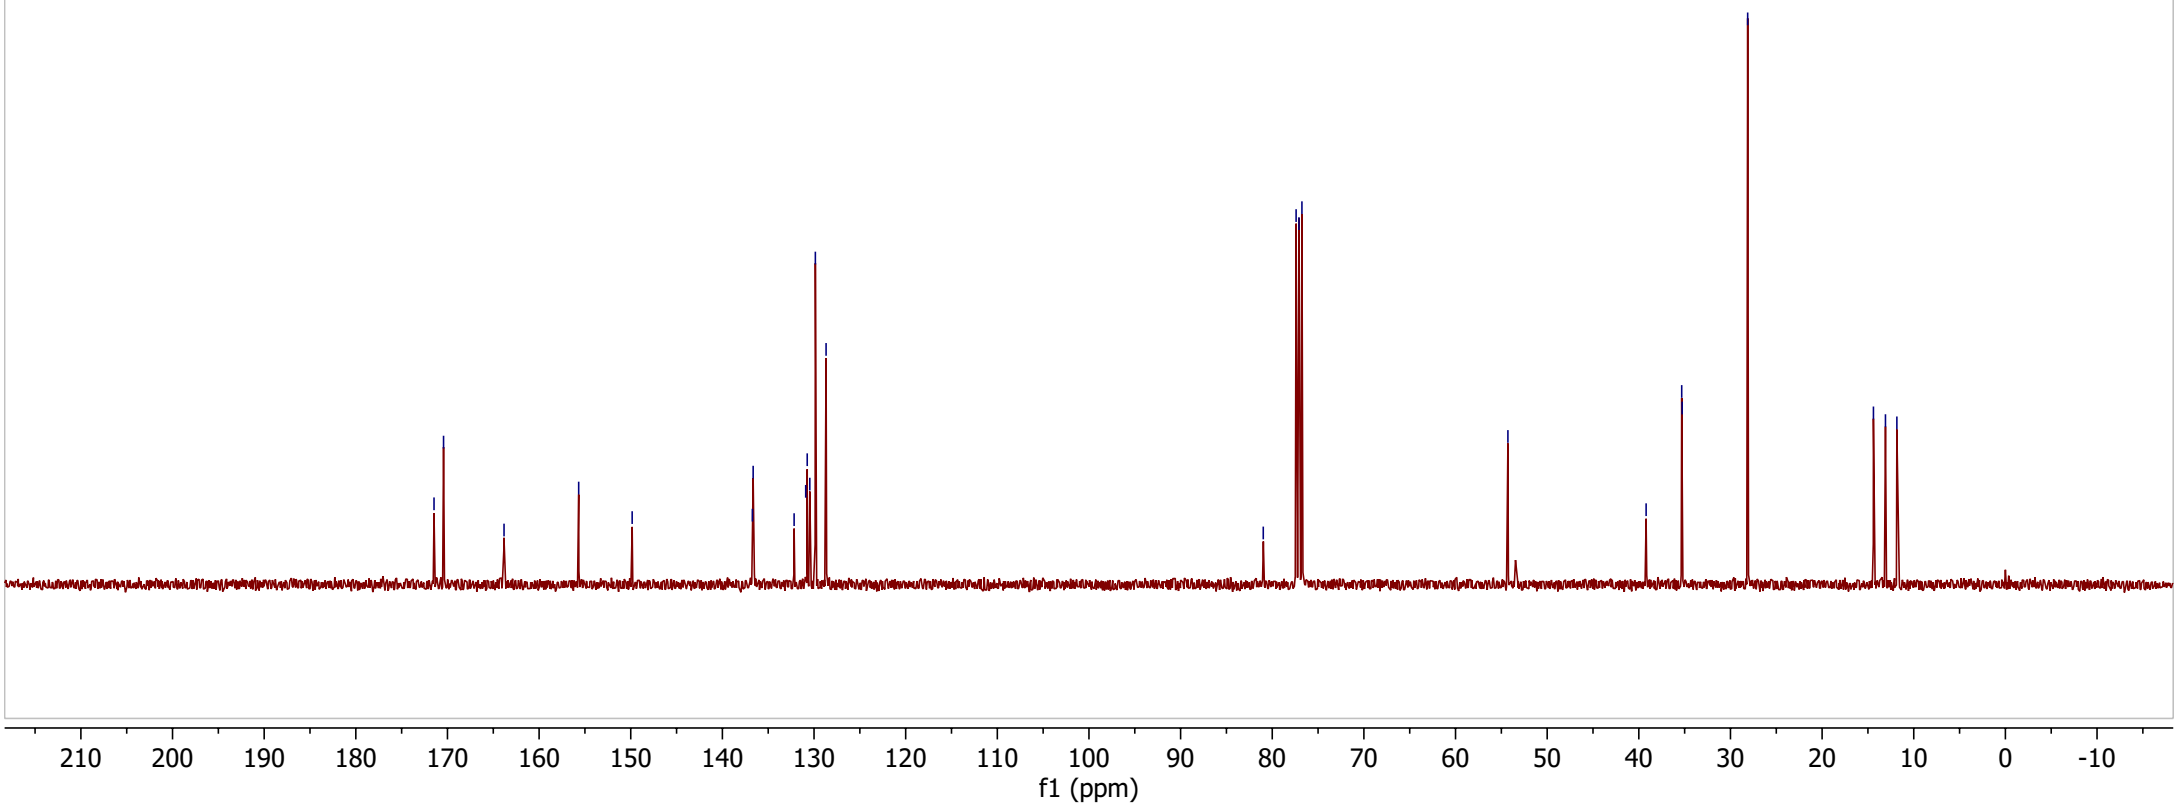

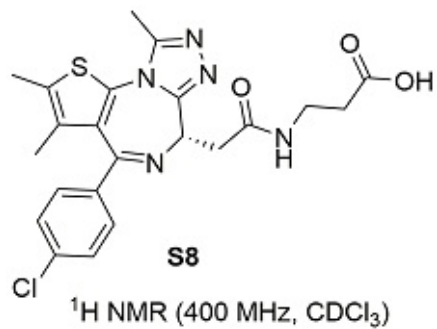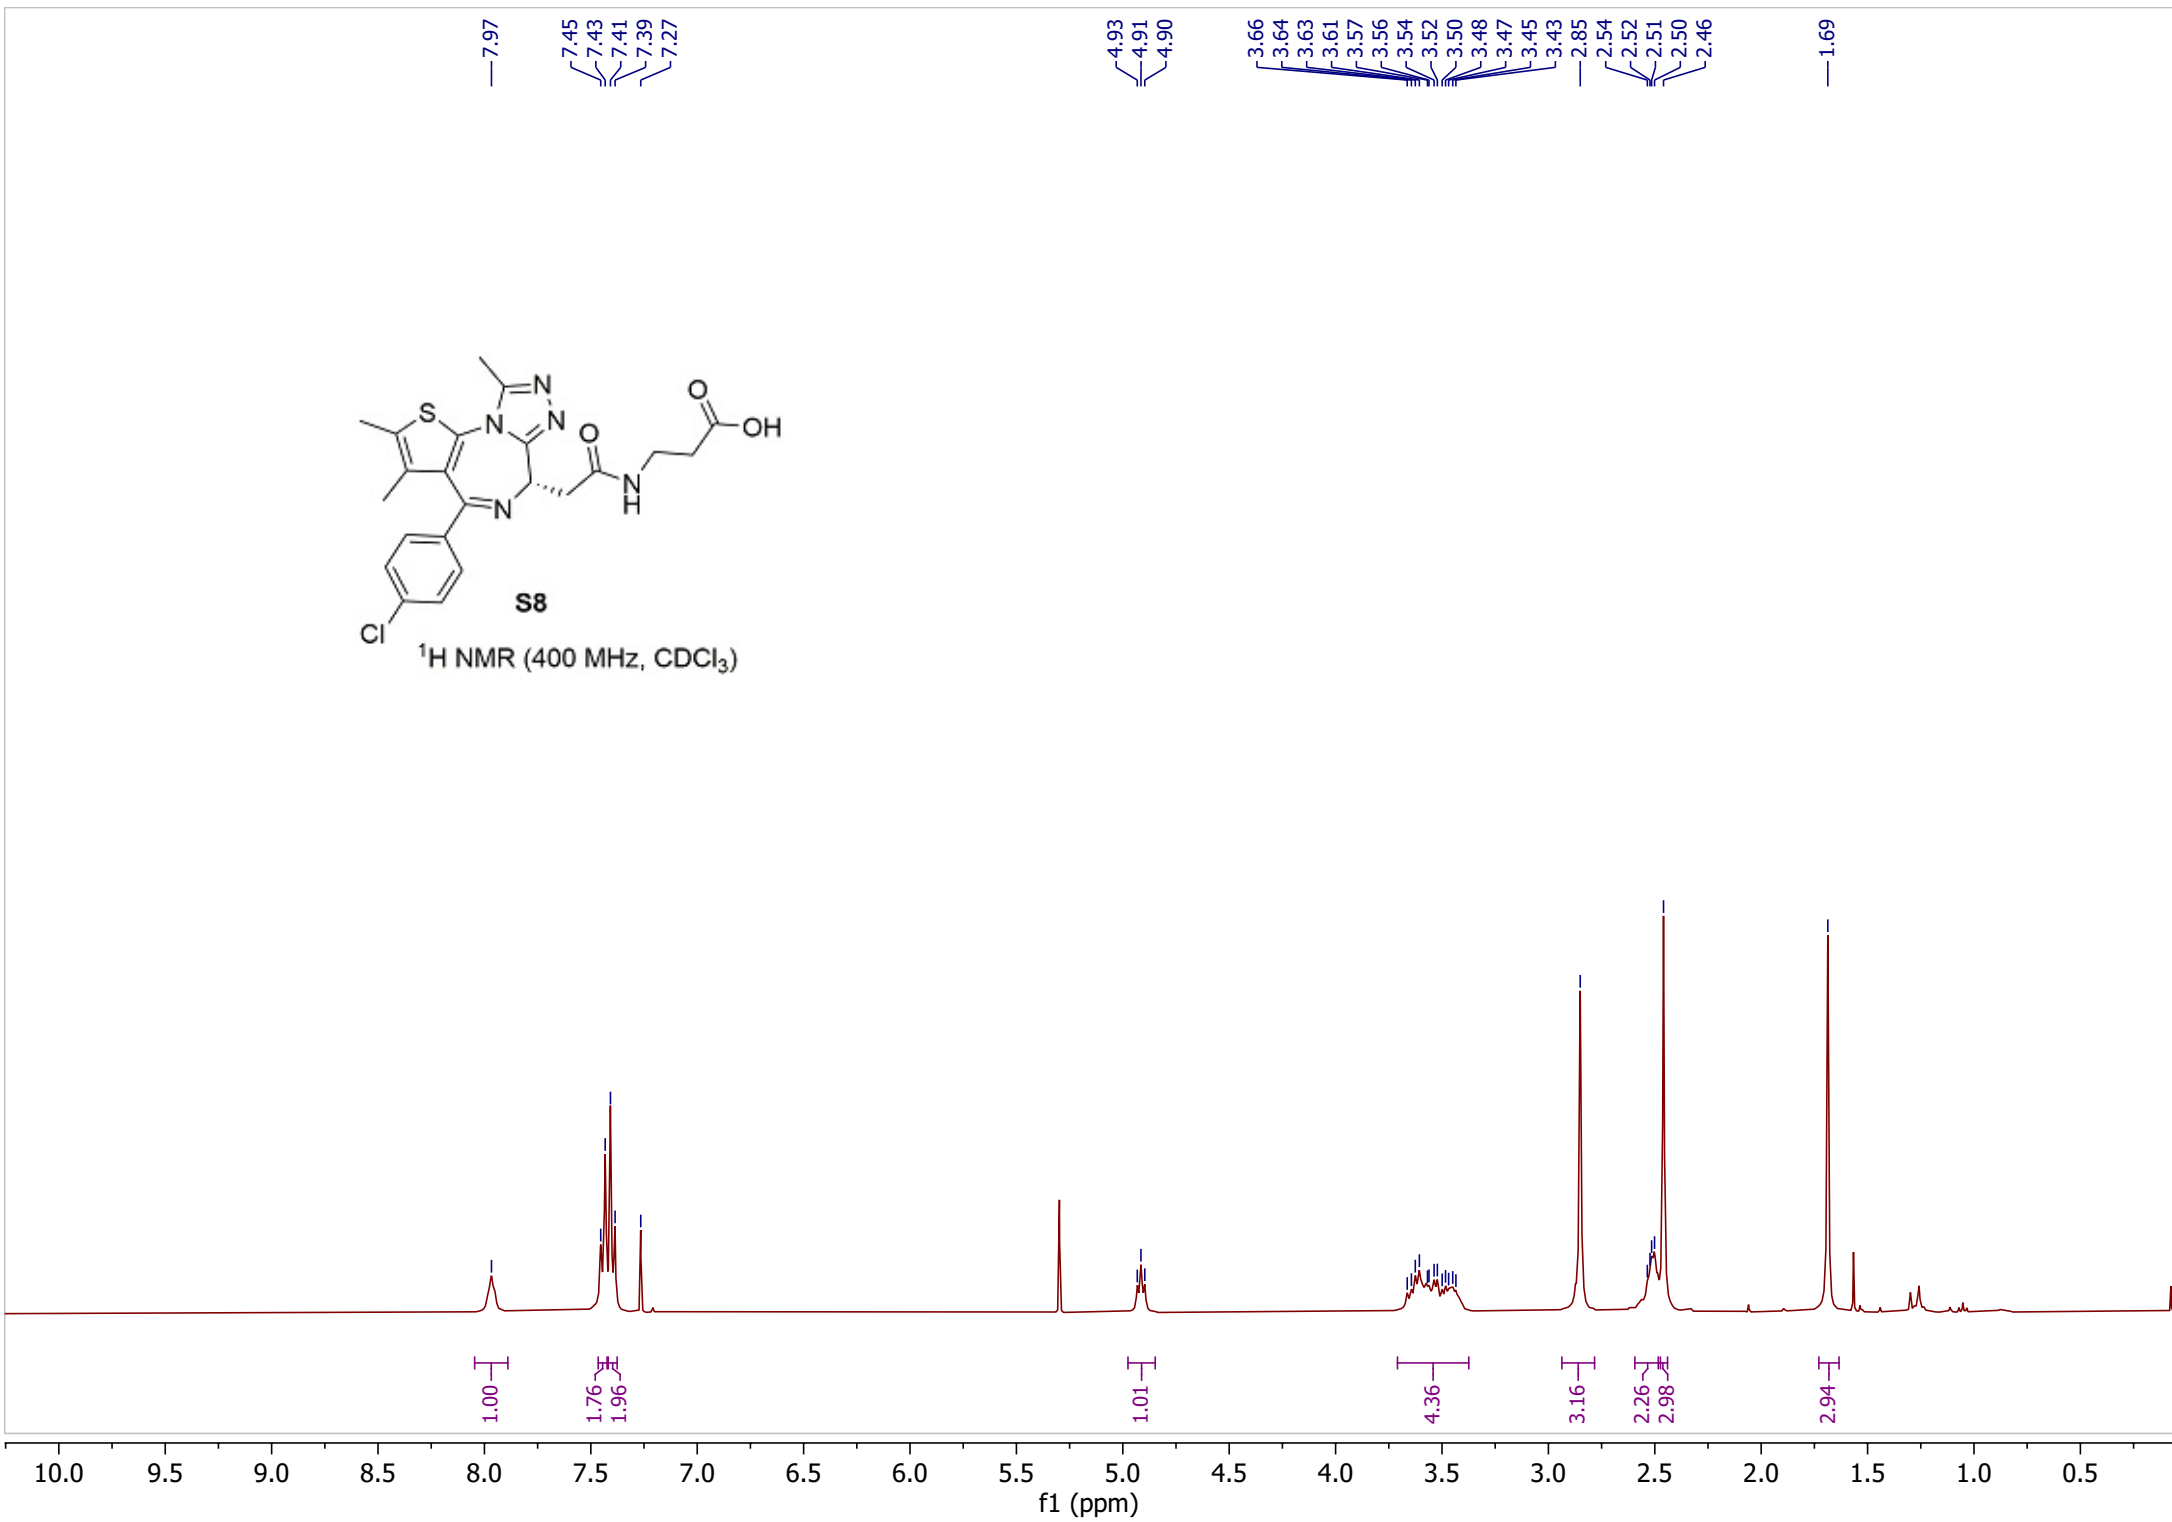



175.32  
170.72  
167.57

160.39  
160.00  
154.33  
151.31

139.49  
134.30  
133.21  
132.14  
130.75  
130.03  
129.33

116.68  
113.82

77.35 CDCl<sub>3</sub>  
77.04 CDCl<sub>3</sub>  
76.72 CDCl<sub>3</sub>

52.93

36.12  
35.58  
33.42

14.21  
13.15  
11.02

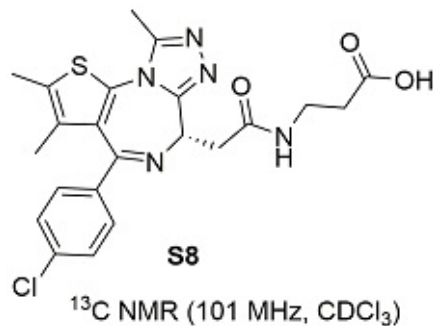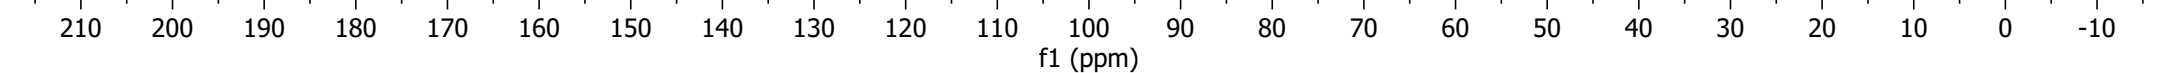



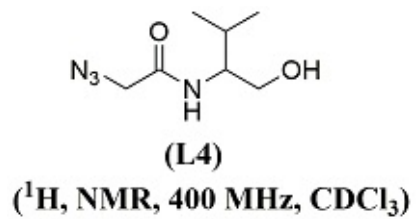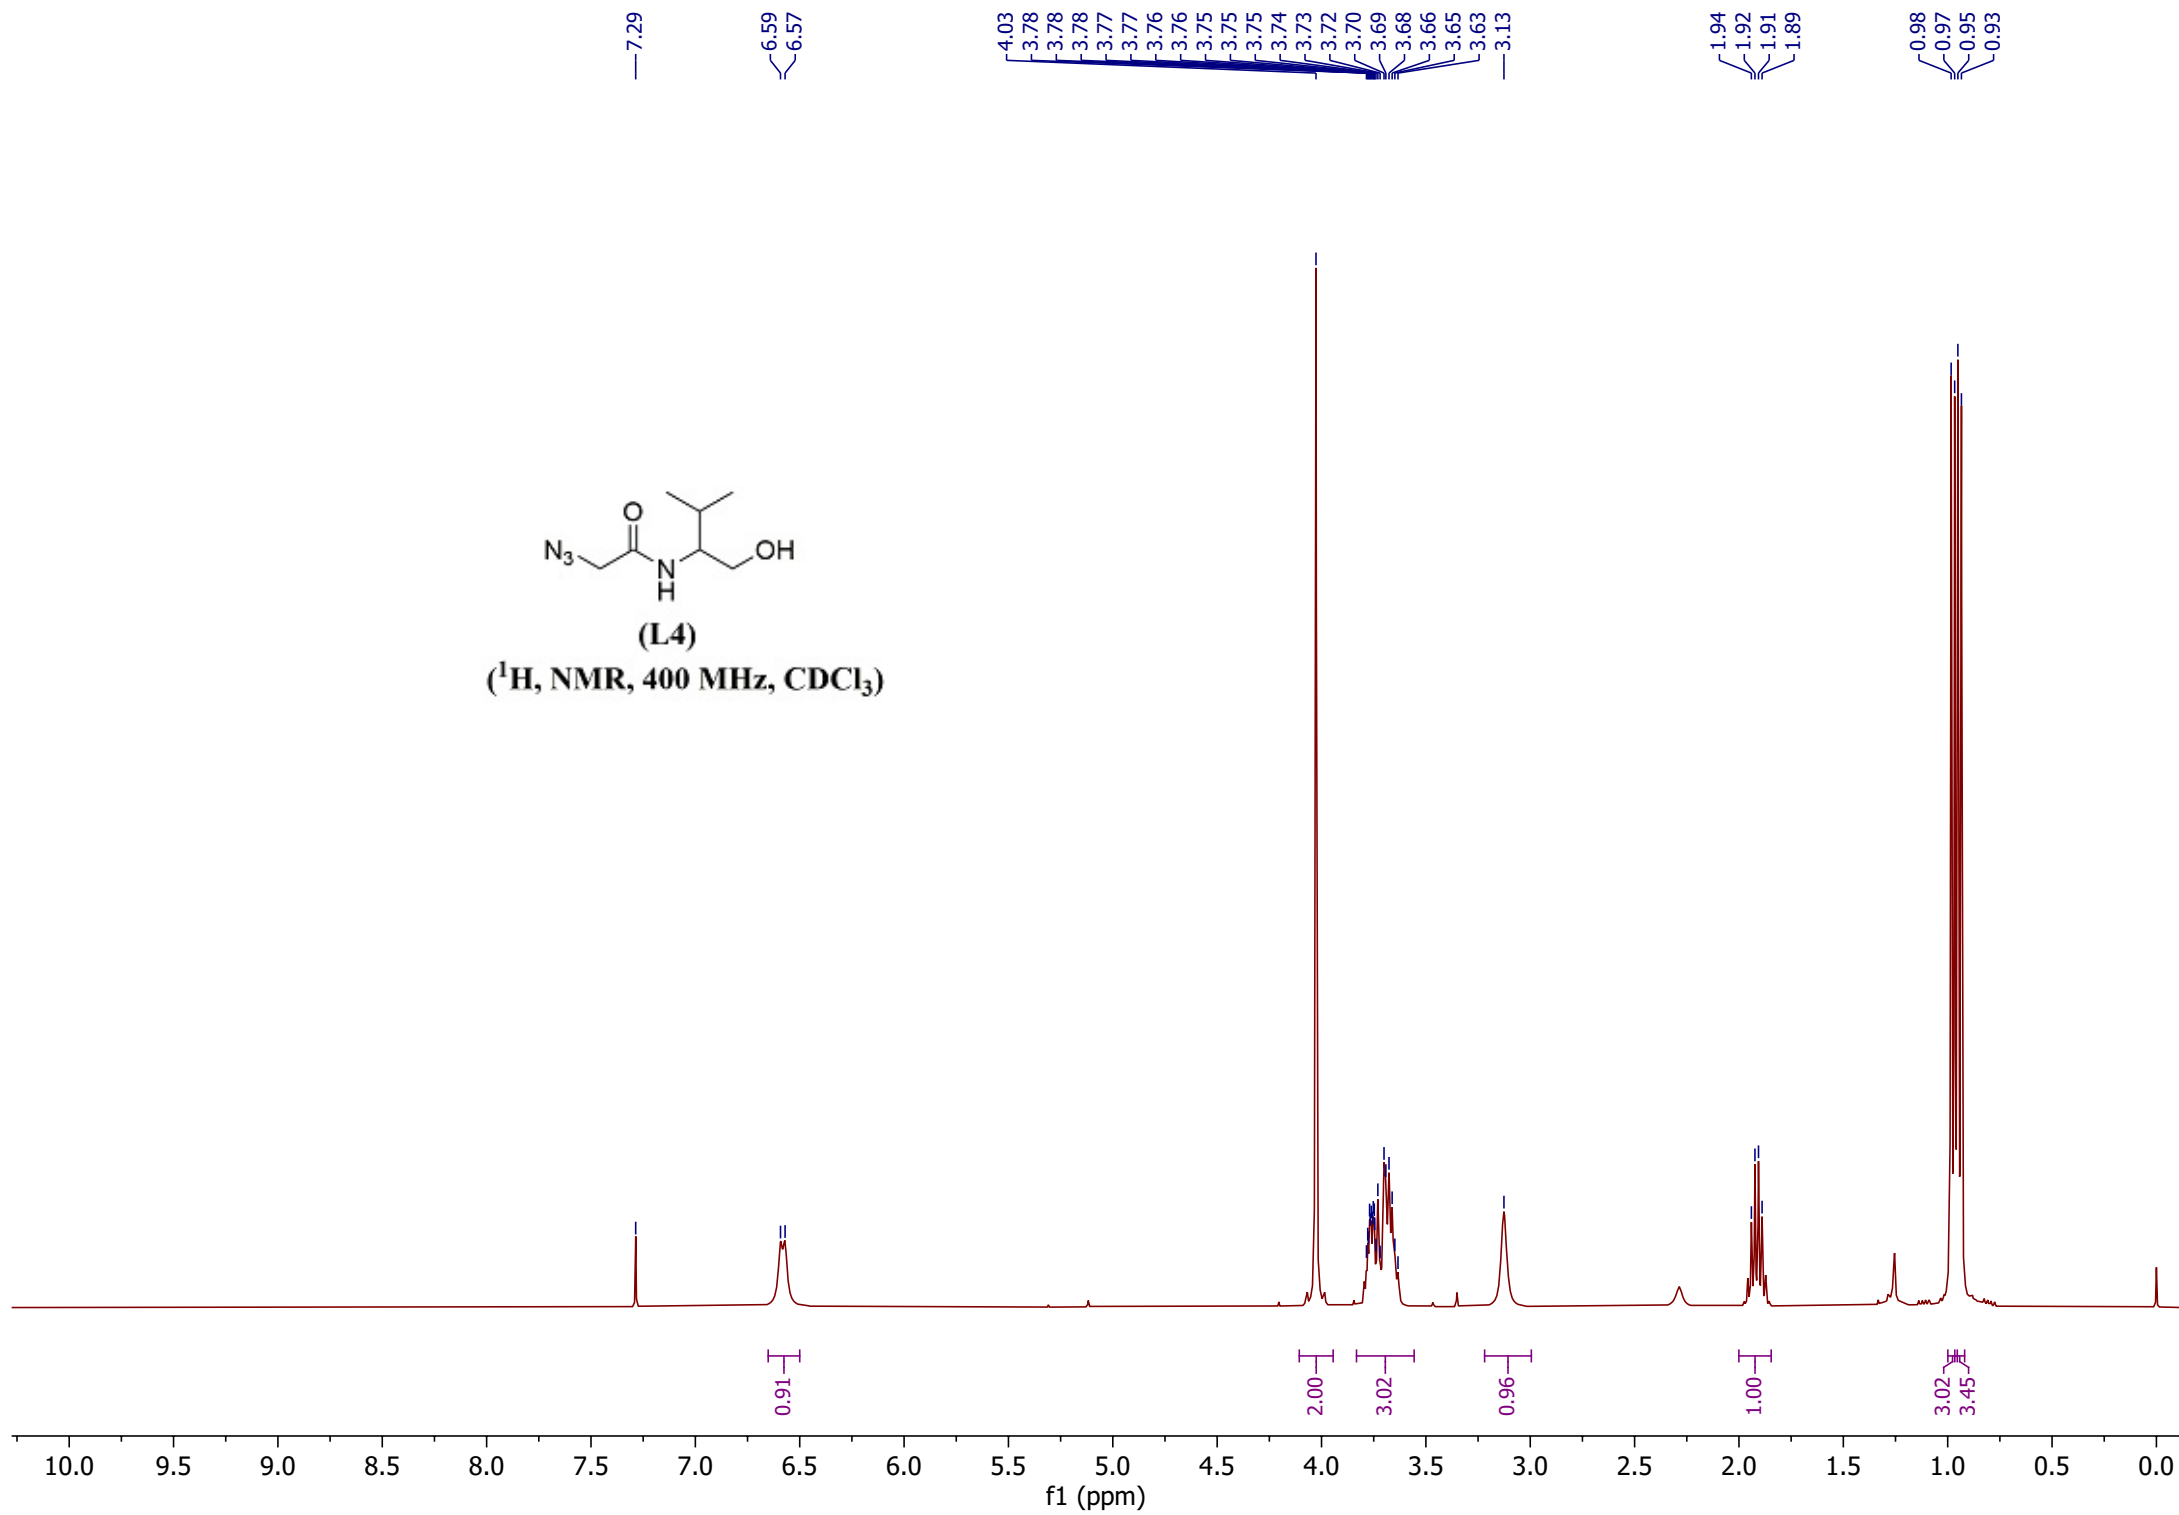

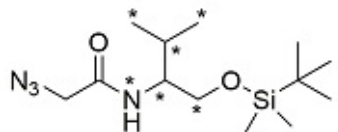

H3

\* = <sup>13</sup>C & <sup>15</sup>N

<sup>1</sup>H NMR (400 MHz, CDCl<sub>3</sub>)

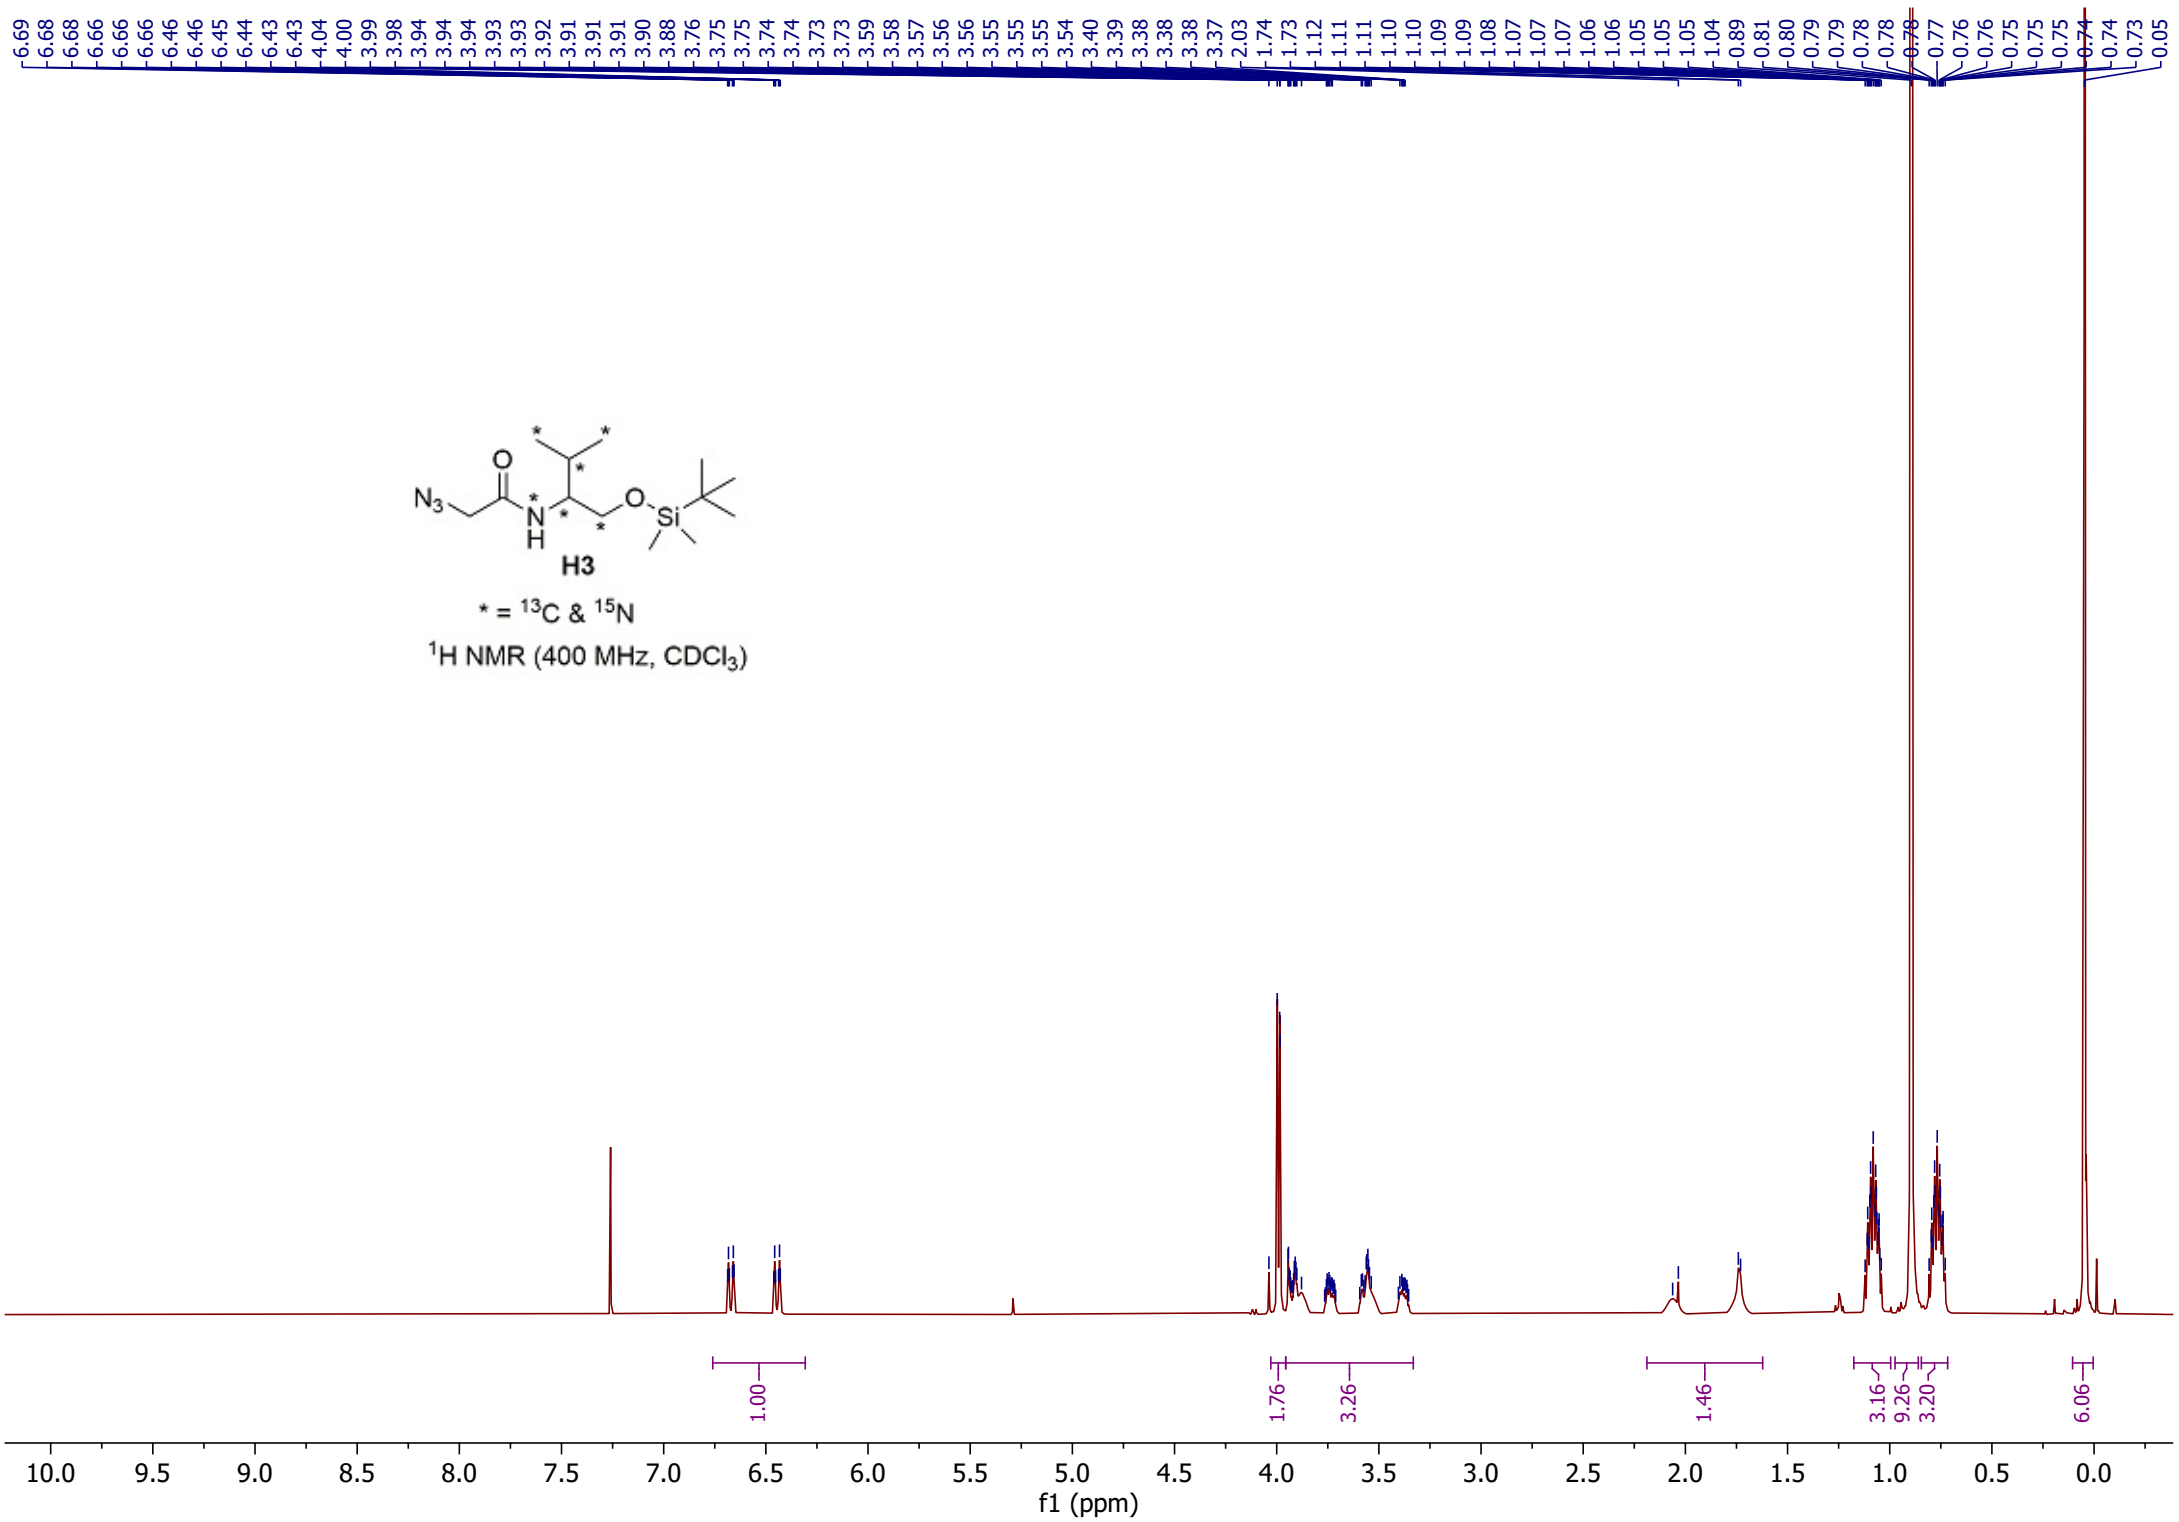



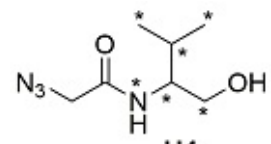

H4

\* = <sup>13</sup>C & <sup>15</sup>N

<sup>1</sup>H NMR (400 MHz, CDCl<sub>3</sub>)

6.61, 6.61, 6.60, 6.59, 6.58, 6.58, 6.38, 6.38, 6.38, 6.36, 6.36, 6.36, 4.05, 3.92, 3.89, 3.87, 3.57, 3.53, 2.44, 2.18, 2.12, 2.12, 2.11, 2.10, 2.09, 2.08, 2.07, 2.05, 2.05, 1.80, 1.79, 1.78, 1.77, 1.76, 1.75, 1.75, 1.74, 1.72, 1.71, 1.15, 1.15, 1.15, 1.14, 1.14, 1.13, 1.13, 1.12, 1.12, 1.11, 1.11, 1.10, 1.10, 1.09, 0.82, 0.81, 0.80, 0.80, 0.79, 0.79, 0.78, 0.78, 0.77

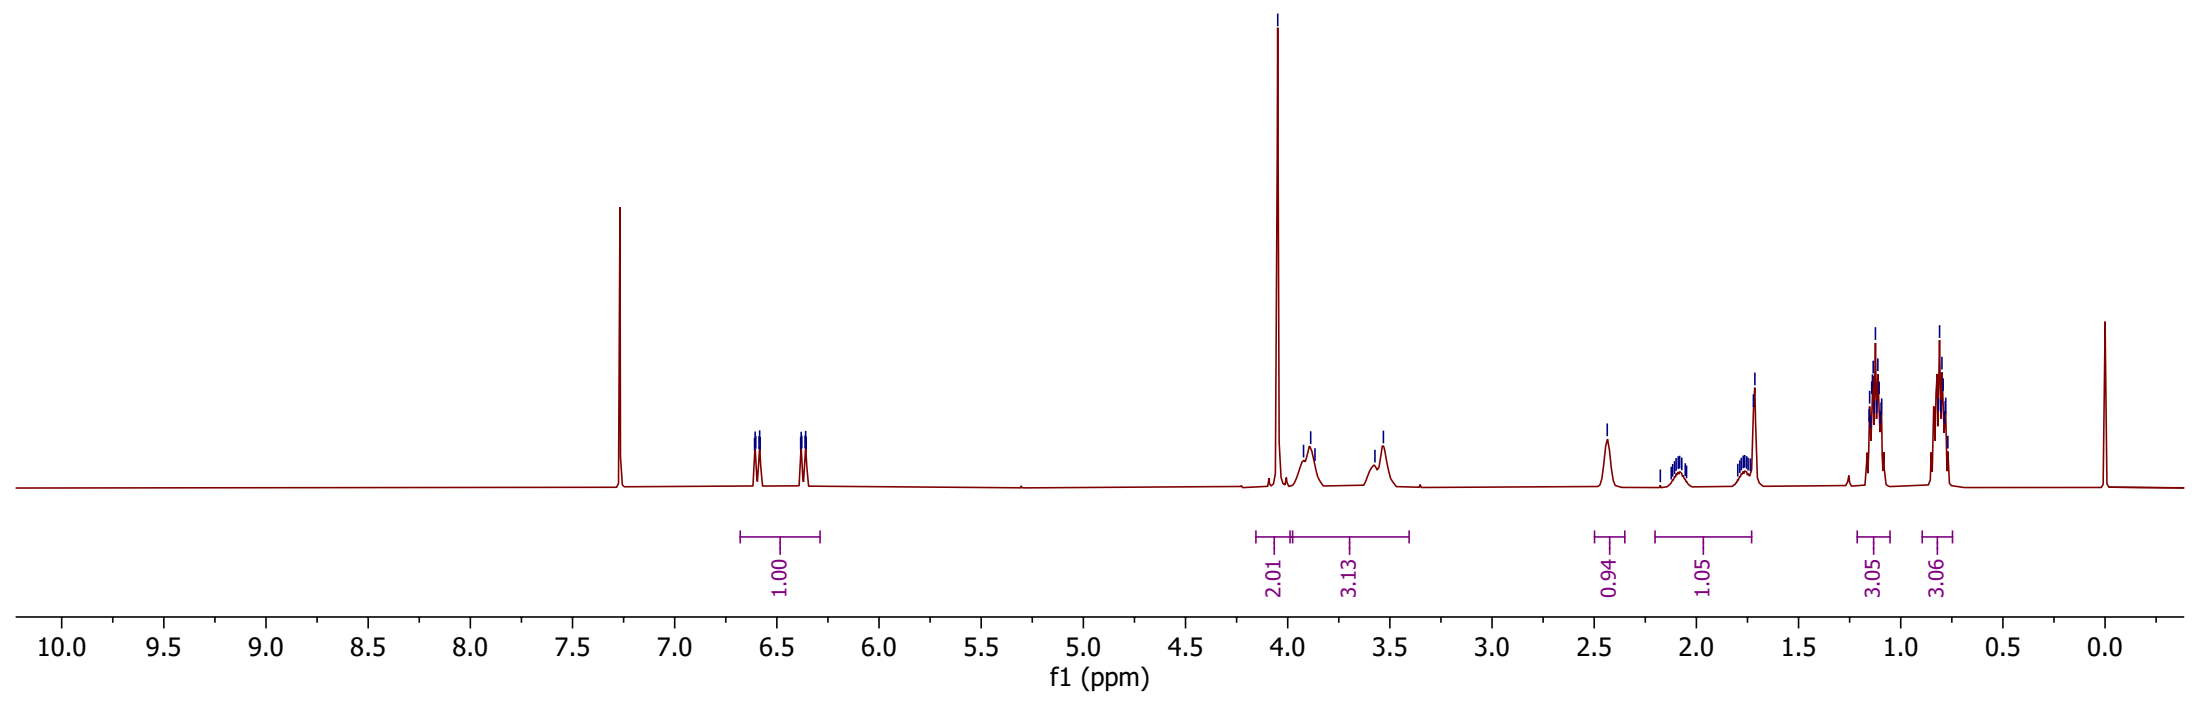

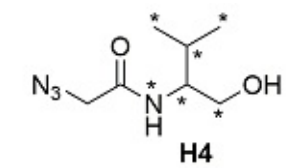

\* =  $^{13}\text{C}$  &  $^{15}\text{N}$

$^{13}\text{C}$  NMR (101 MHz,  $\text{CDCl}_3$ )

—167.52

77.36  $\text{CDCl}_3$   
77.04  $\text{CDCl}_3$   
76.72  $\text{CDCl}_3$

63.81  
63.42  
57.54  
57.44  
57.18  
57.15  
57.09  
57.06  
56.79  
56.70  
52.77  
29.44  
29.09  
28.74  
28.38  
19.65  
19.30  
18.90  
18.54

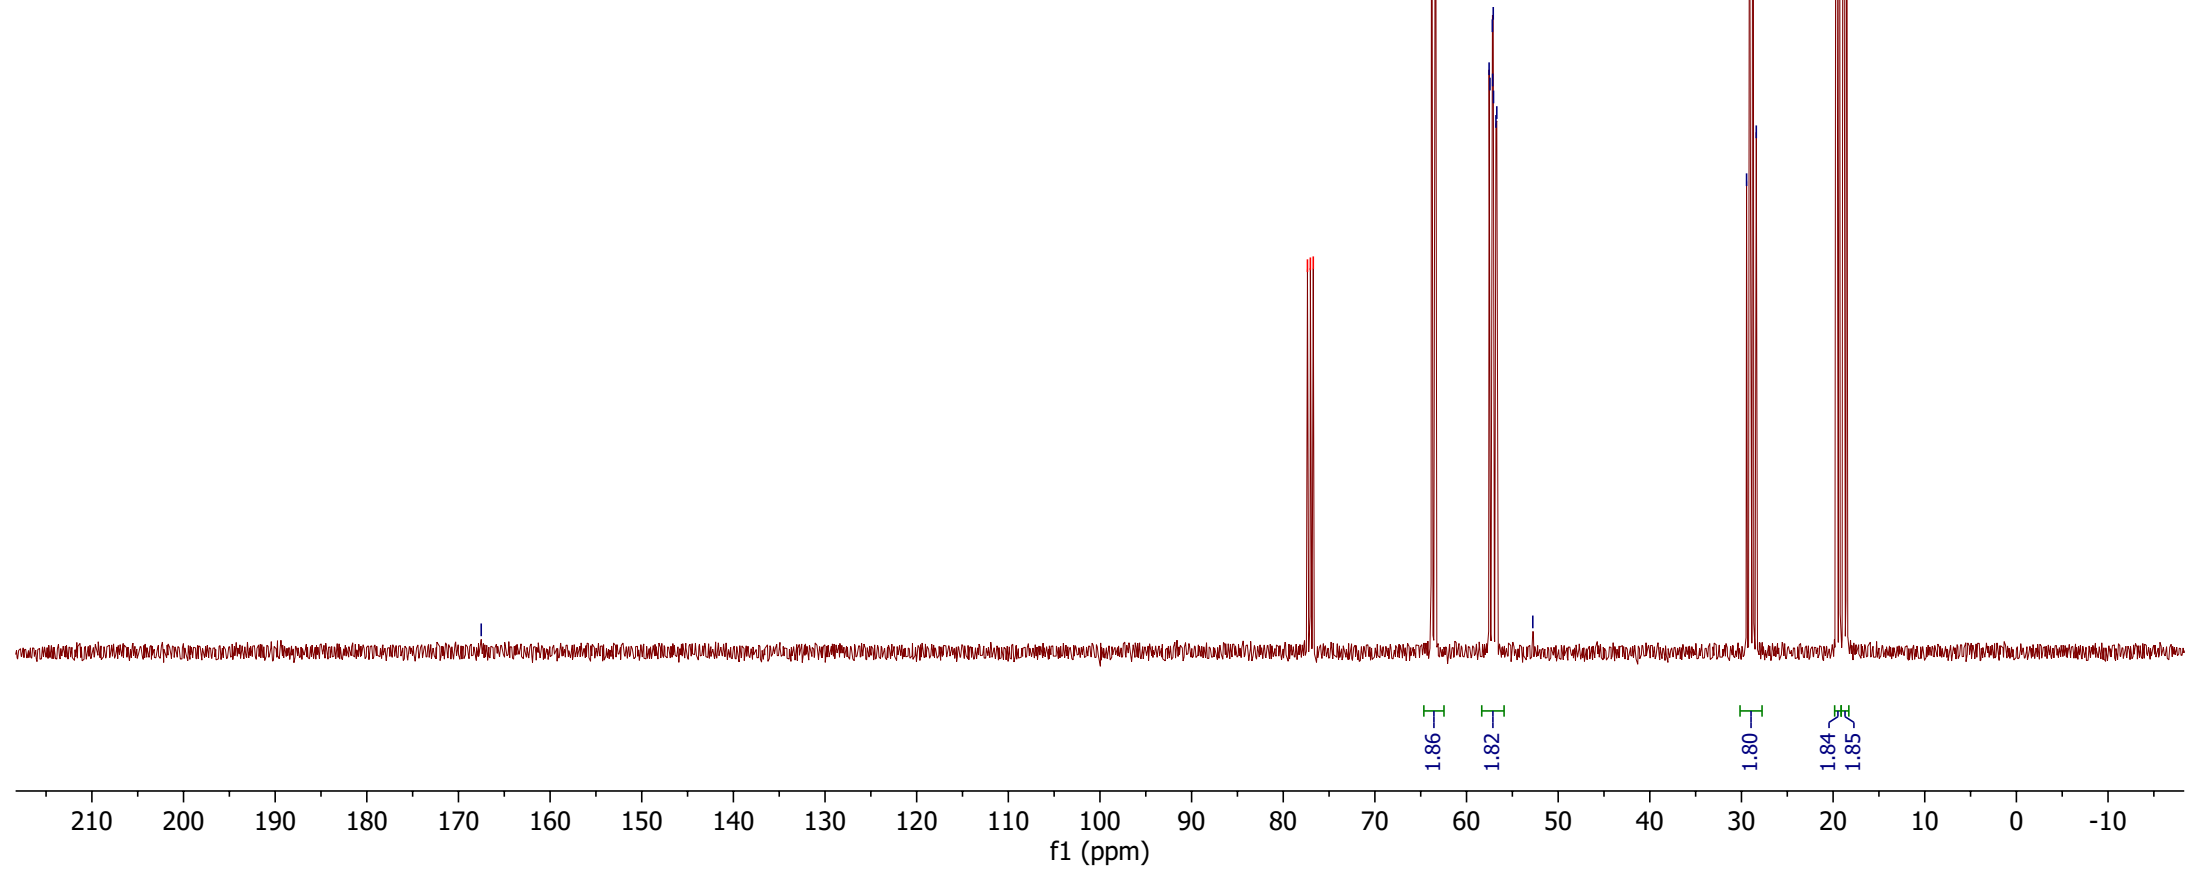

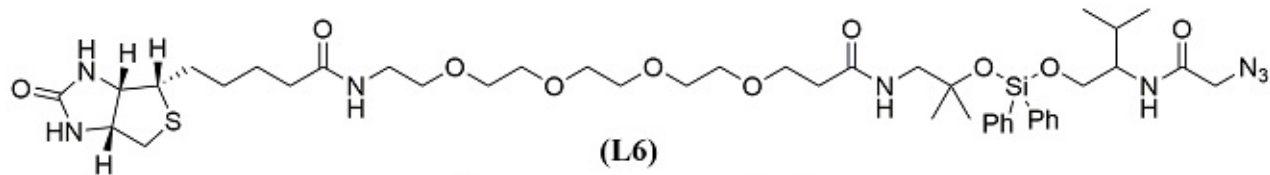

(L6)

(<sup>1</sup>H, NMR, 600 MHz, CDCl<sub>3</sub>)

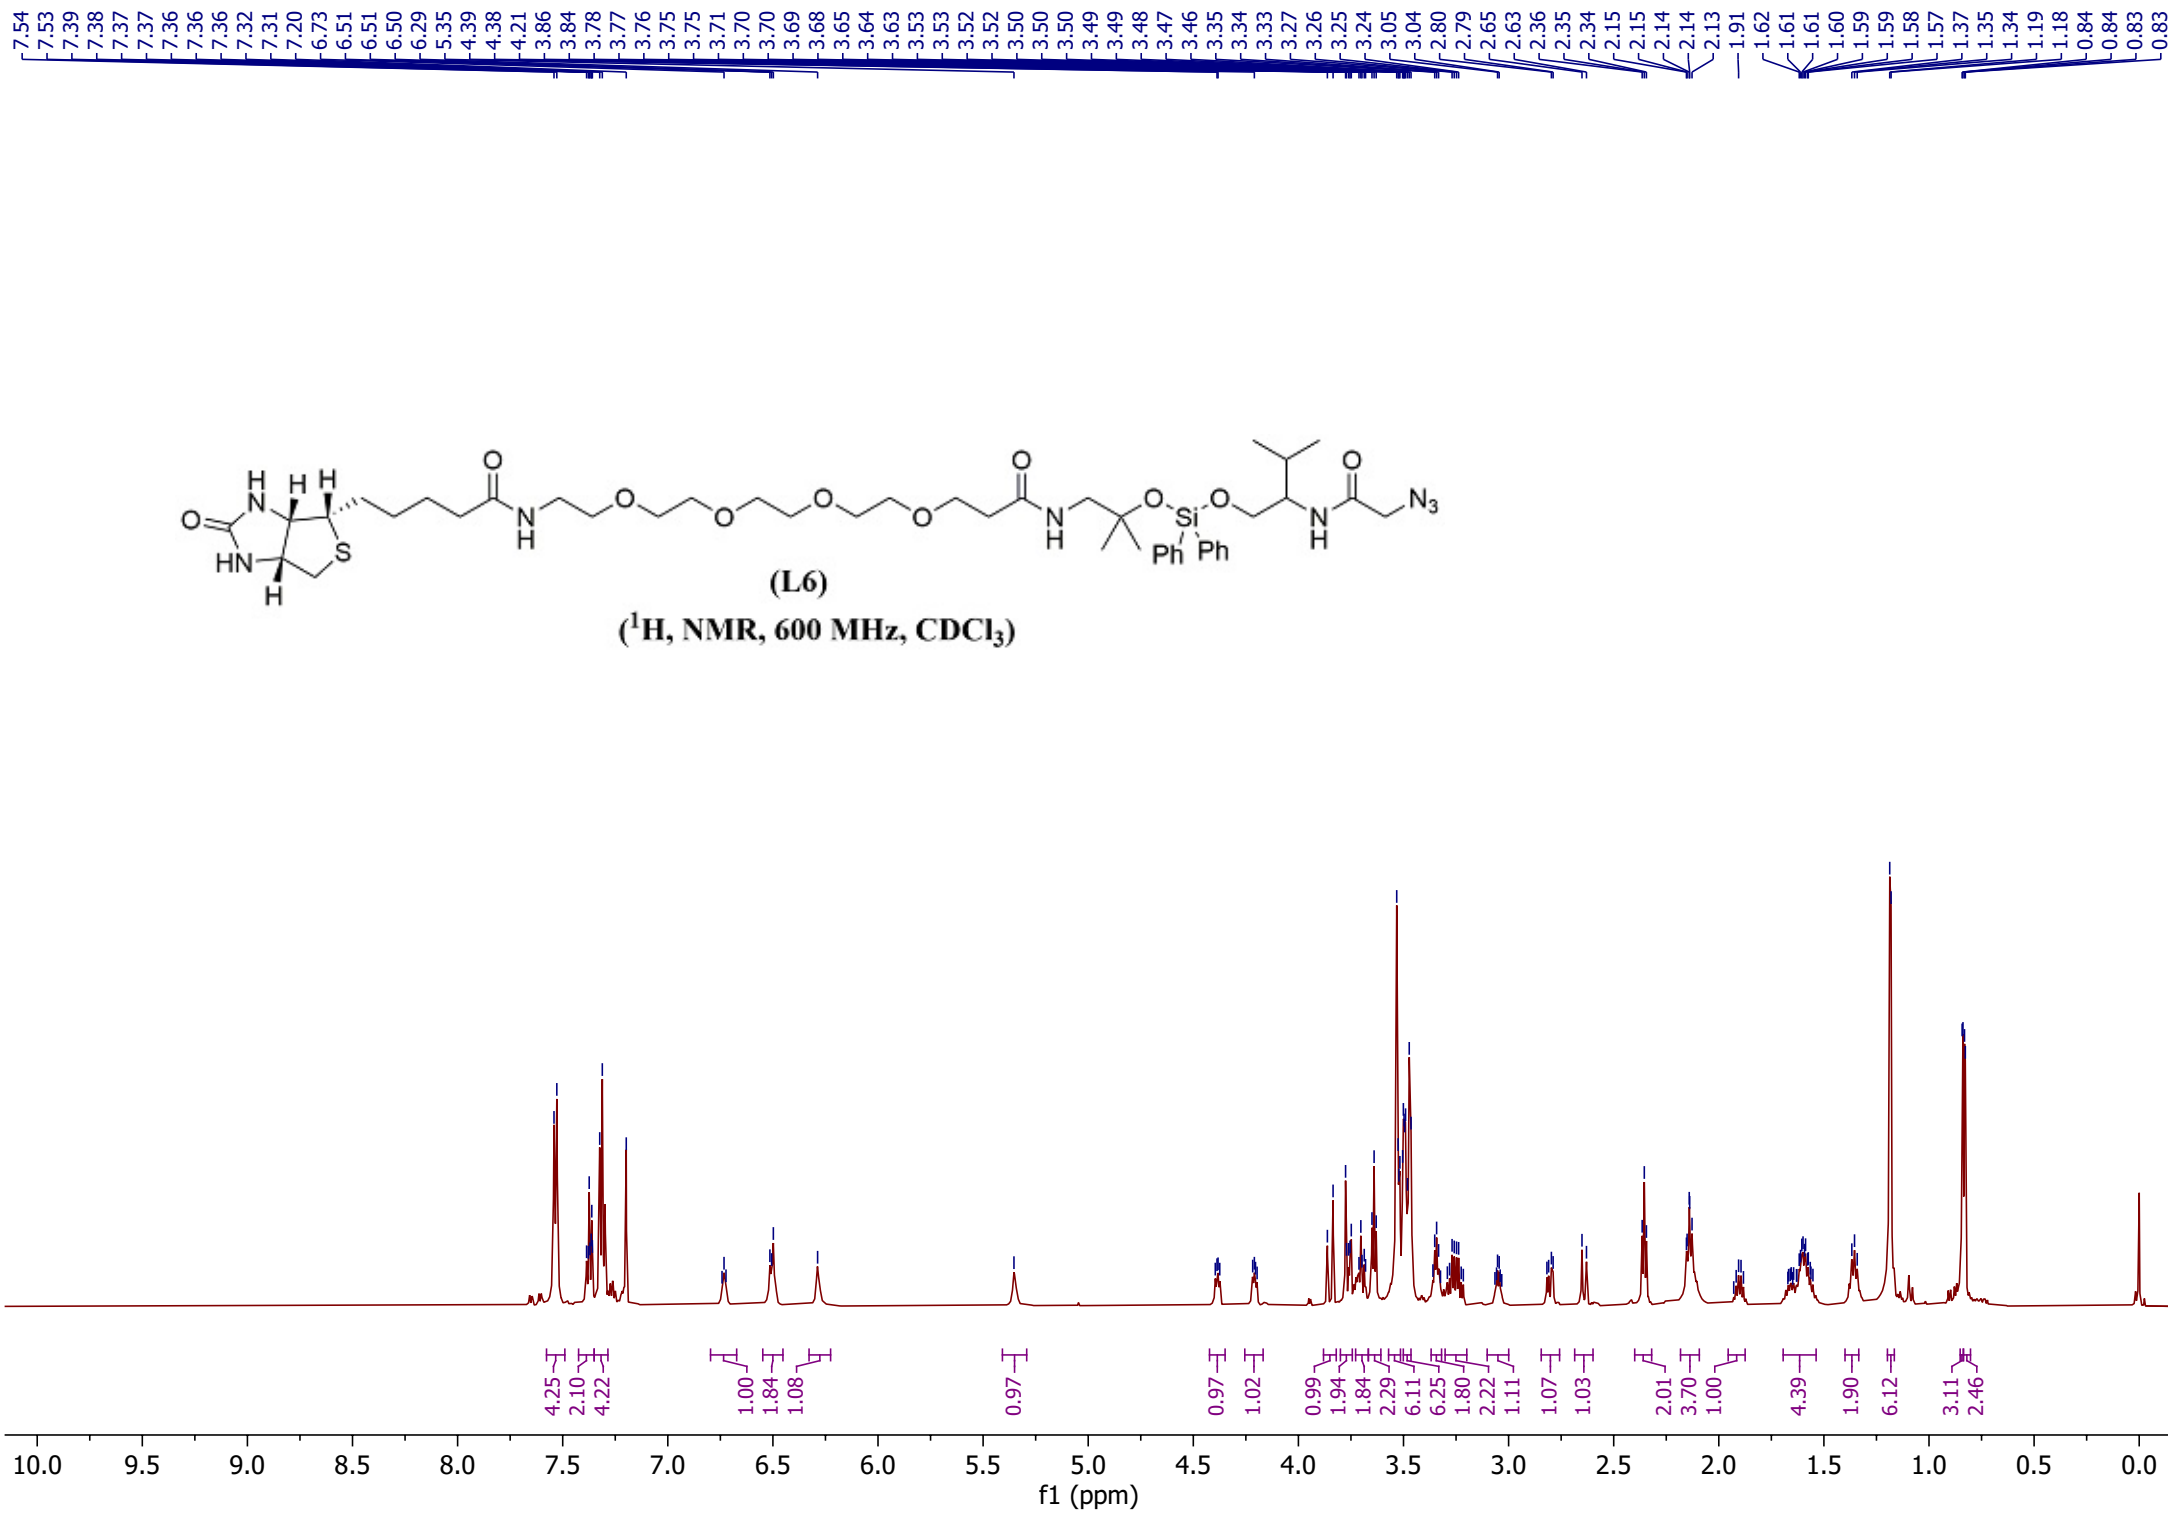



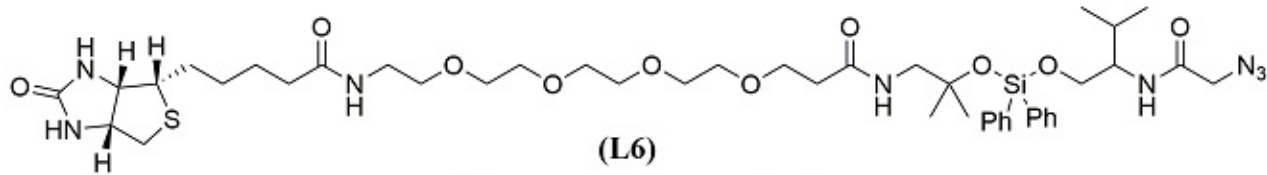

(L6)  
 $^{13}\text{C}$ , NMR, 101 MHz,  $\text{CDCl}_3$

172.28  
 170.35  
 165.38  
 162.74

133.77  
 133.75  
 133.50  
 133.37  
 132.70  
 132.59  
 129.42  
 129.39  
 126.93  
 126.63

76.20  $\text{CDCl}_3$   
 75.99  $\text{CDCl}_3$   
 75.78  $\text{CDCl}_3$   
 74.78  
 69.39  
 69.35  
 69.29  
 69.17  
 69.00  
 68.91  
 66.28  
 61.90  
 60.69  
 59.09  
 54.73  
 54.48  
 51.45  
 49.31  
 39.45  
 38.09  
 35.96  
 34.81  
 27.74  
 27.10  
 27.01  
 26.57  
 26.55  
 24.51  
 18.43  
 17.82

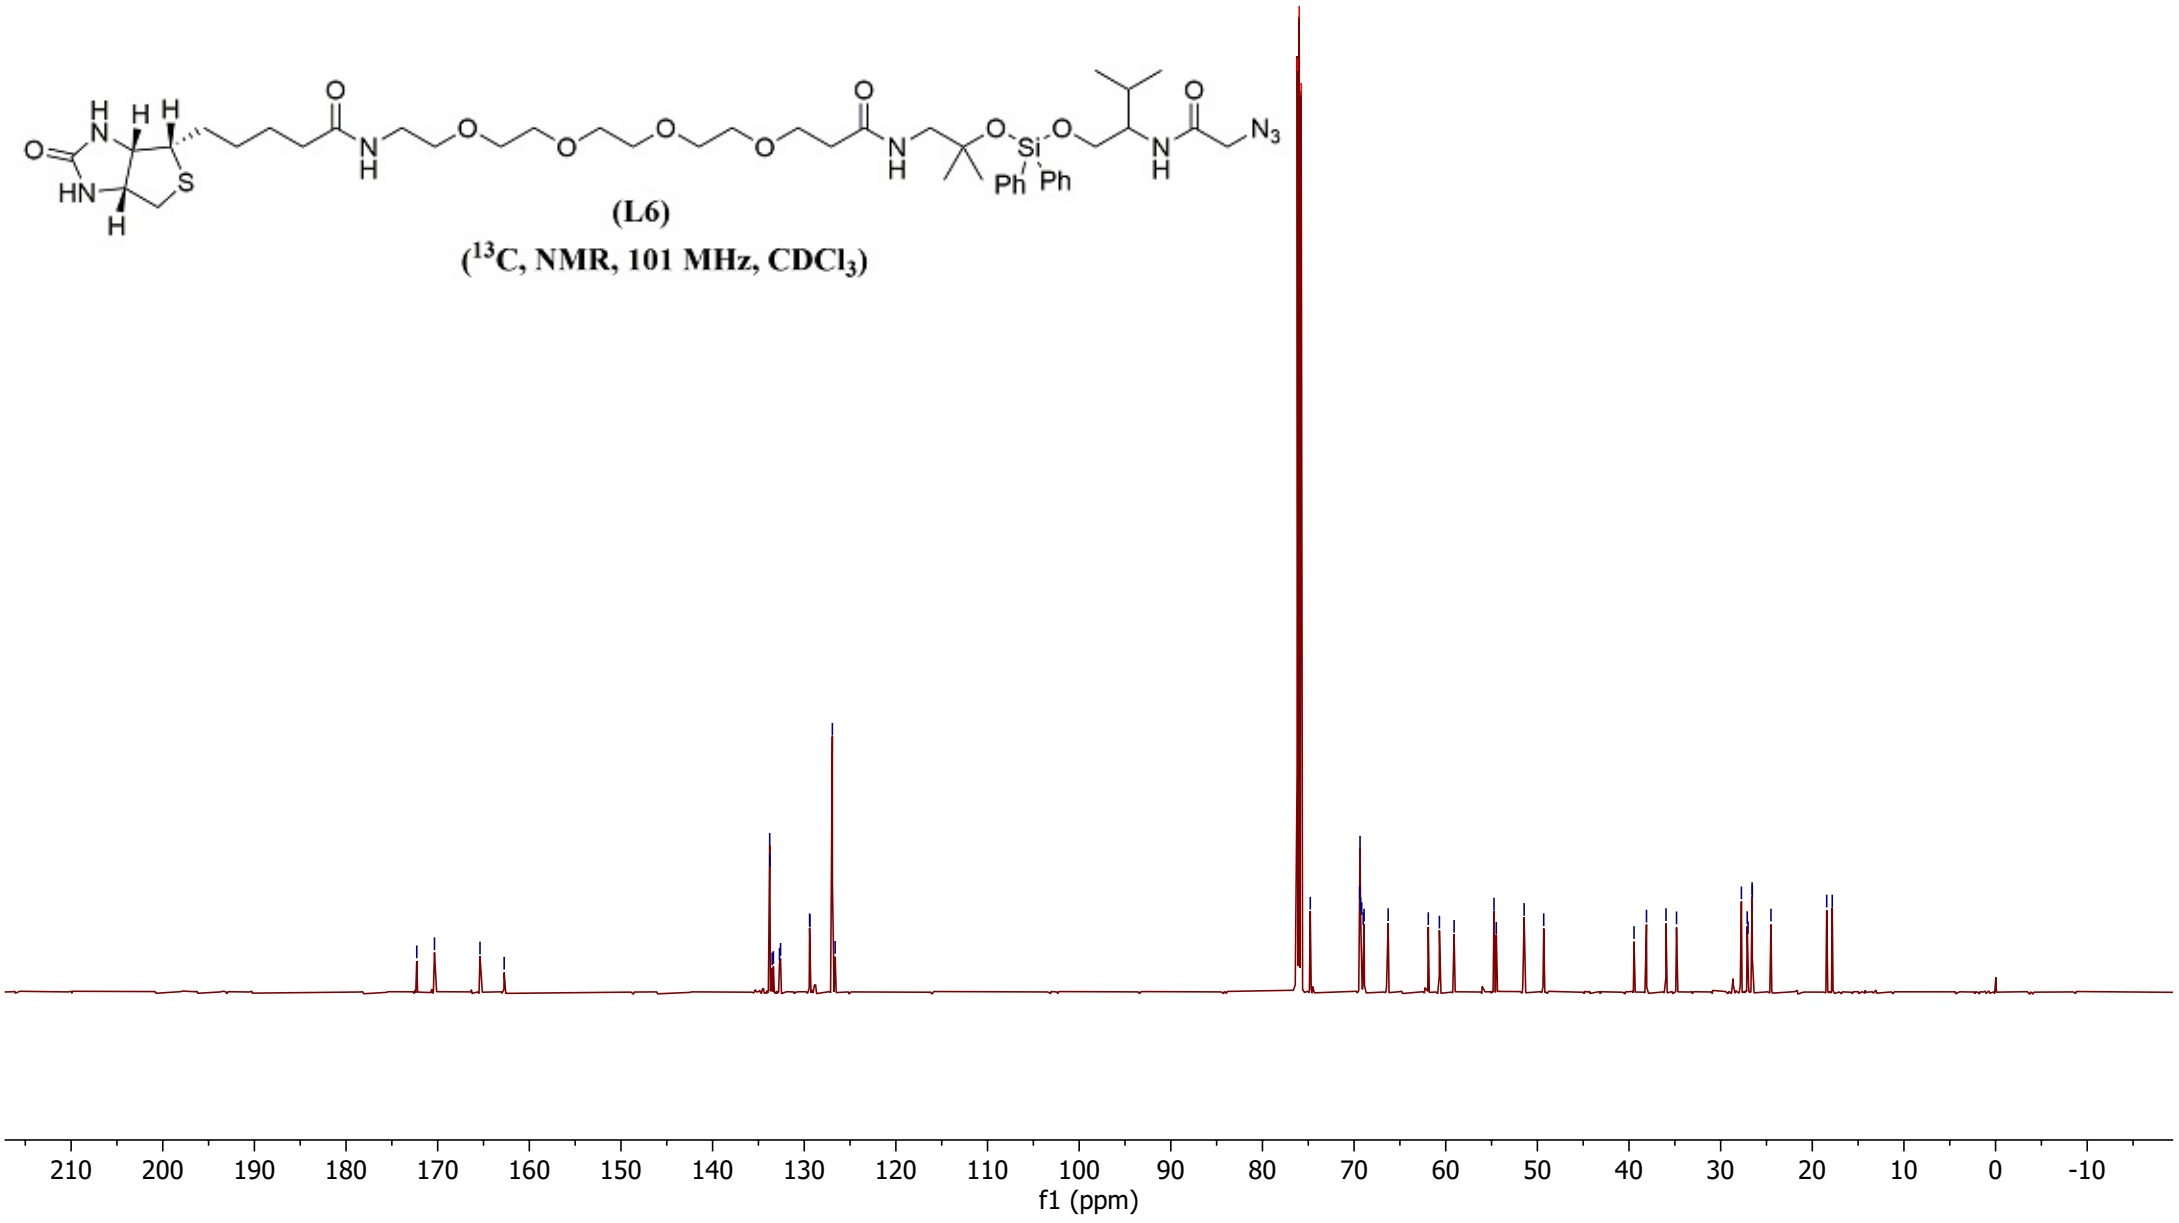

7.62  
7.61  
7.60  
7.60  
7.59  
7.47  
7.45  
7.44  
7.43  
7.43  
7.40  
7.39  
7.38  
7.37  
7.36  
7.28  
6.91  
6.59  
5.67  
4.46  
4.46  
4.44  
4.29  
4.29  
4.28  
4.28  
4.28  
3.94  
3.90  
3.85  
3.81  
3.73  
3.71  
3.70  
3.60  
3.59  
3.59  
3.57  
3.57  
3.56  
3.55  
3.54  
3.53  
3.42  
3.41  
3.40  
3.34  
3.33  
3.32  
3.31  
3.12  
3.11  
2.88  
2.86  
2.85  
2.73  
2.70  
2.54  
2.44  
2.43  
2.41  
2.23  
2.21  
2.20  
2.20  
1.71  
1.70  
1.69  
1.68  
1.67  
1.65  
1.64  
1.63  
1.63  
1.44  
1.42  
1.40  
1.40  
1.26  
1.25  
1.07  
1.06  
1.05  
0.76  
0.75  
0.73

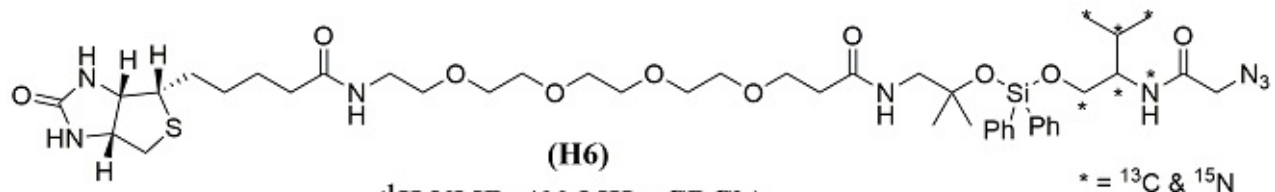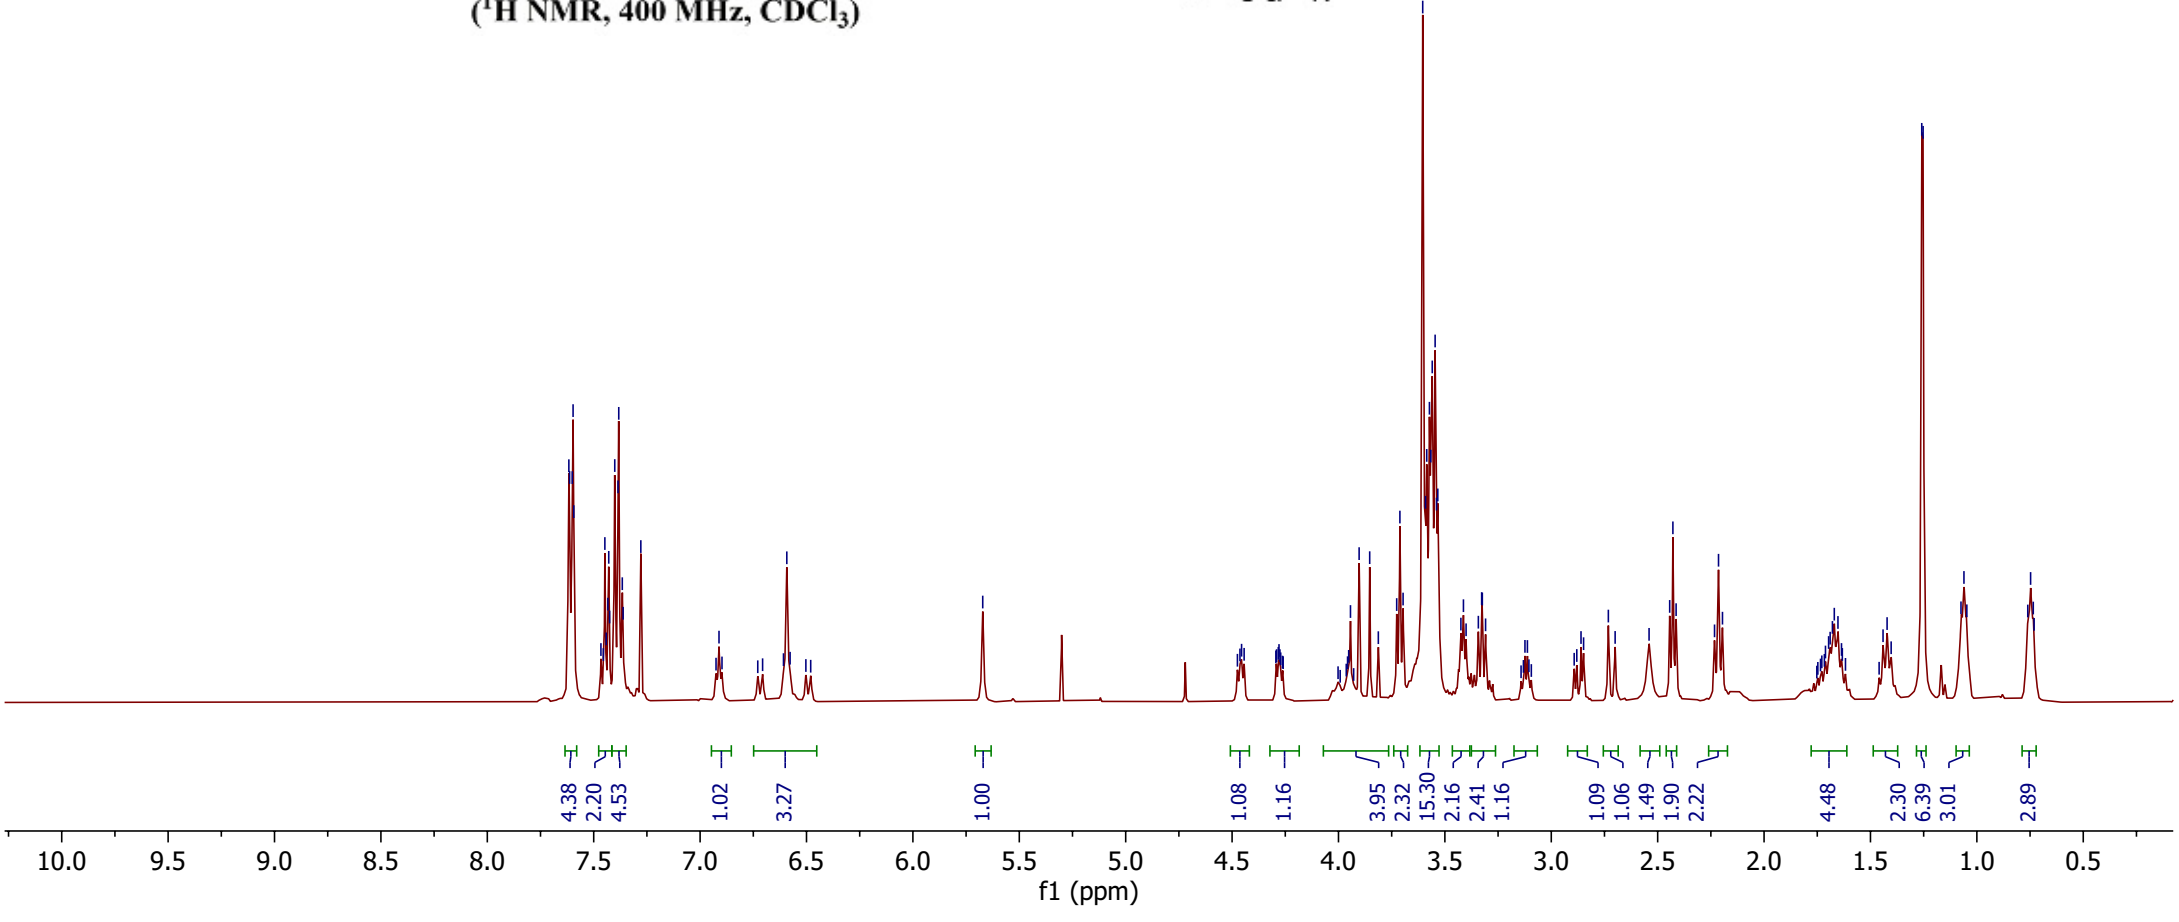

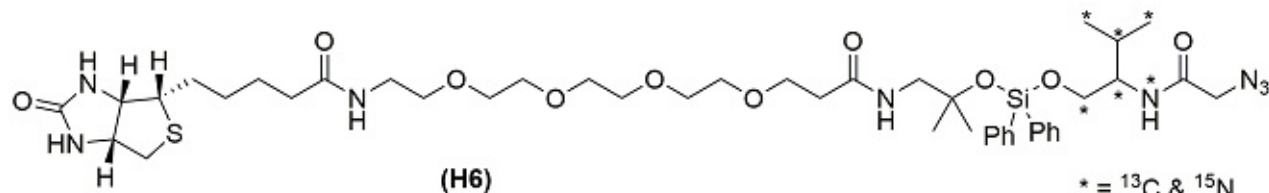

( $^{13}\text{C}$  NMR, 101 MHz  $\text{CDCl}_3$ )

173.41  
171.42  
166.53  
166.37  
164.02

134.82  
134.67  
133.76  
133.65  
130.48  
130.45  
127.99  
127.68

77.40  
77.09  
76.77  
75.84  
70.45  
70.40  
70.35  
70.23  
70.05  
69.99  
67.34  
63.17  
62.76  
61.75  
60.18  
56.19  
56.10  
55.83  
55.79  
55.73  
55.69  
55.42  
55.33  
52.52  
52.45  
50.36  
40.52  
39.15  
37.02  
35.93  
29.30  
28.95  
28.59  
28.23  
27.62  
25.63  
19.65  
19.30  
19.06  
18.70

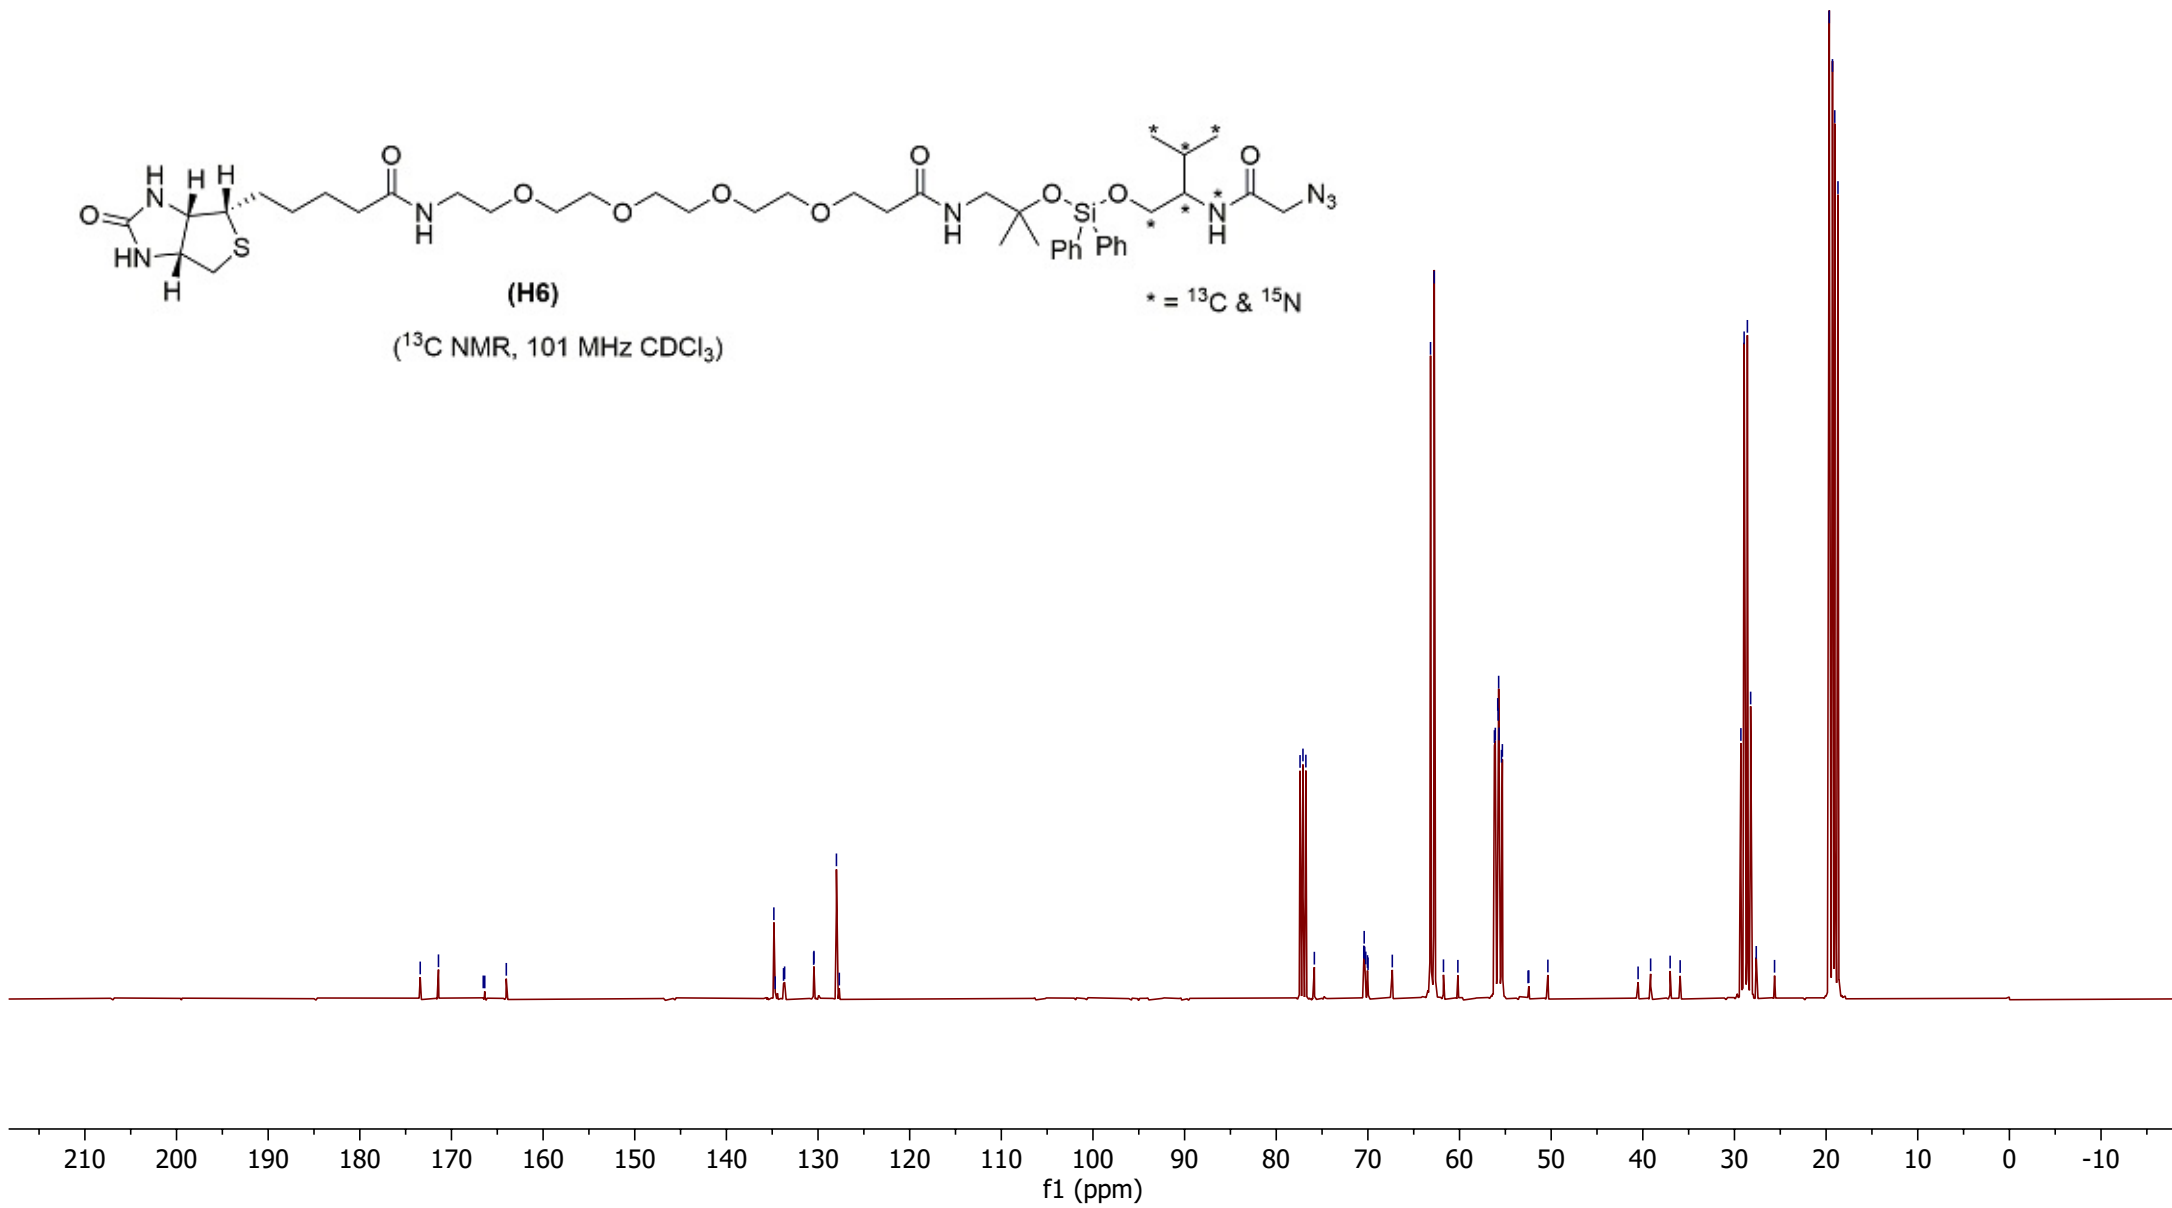

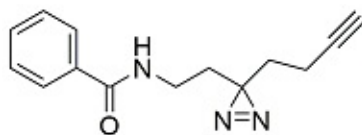

LD-C

<sup>1</sup>H NMR (400 MHz, CDCl<sub>3</sub>)

7.80  
7.80  
7.80  
7.79  
7.78  
7.78  
7.53  
7.51  
7.51  
7.50  
7.50  
7.49  
7.46  
7.46  
7.45  
7.44  
7.44  
7.43  
7.42  
7.42  
7.42  
7.27  
6.38

3.34  
3.32  
3.32  
3.31  
3.31  
3.29

2.06  
2.05  
2.04  
2.03  
2.02  
2.02  
2.02  
2.00  
1.99  
1.98  
1.84  
1.82  
1.81  
1.70  
1.69  
1.67

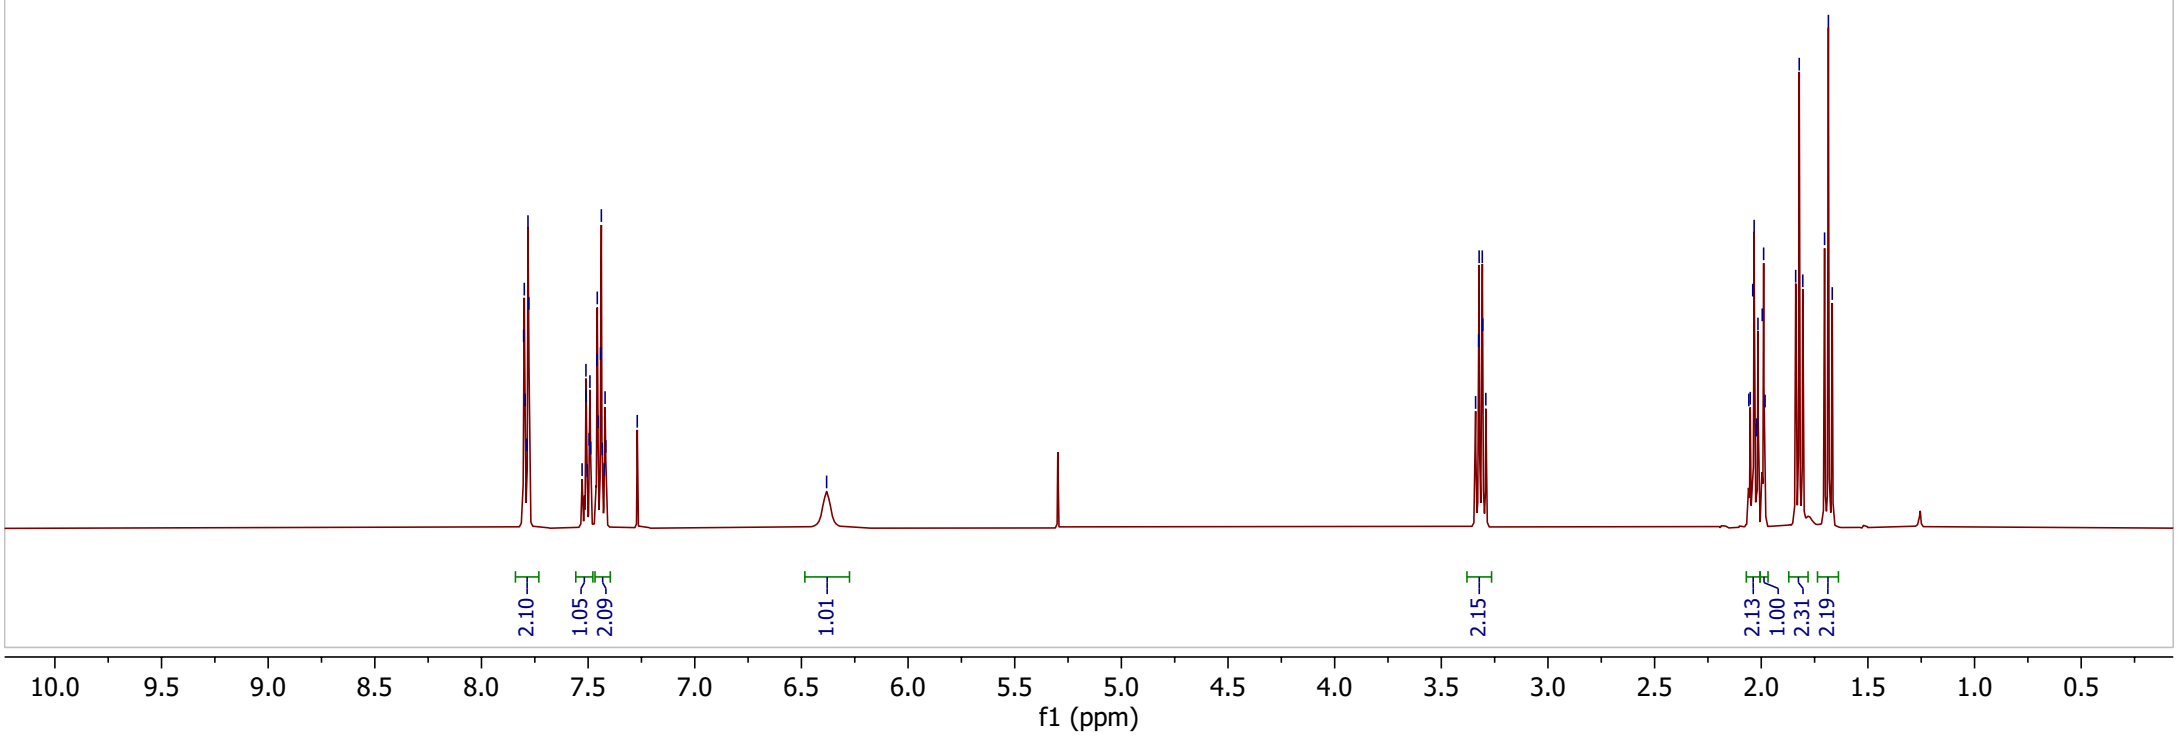

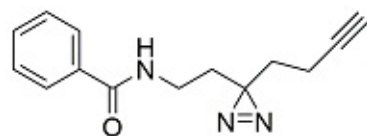

**LD-C**

$^{13}\text{C}$  NMR (101 MHz,  $\text{CDCl}_3$ )

— 167.58

— 134.40

— 131.59

— 128.63

— 126.92

— 82.70

— 77.37

— 77.06

— 76.74

— 69.46

— 34.91

— 32.50

— 32.13

— 26.95

— 13.21

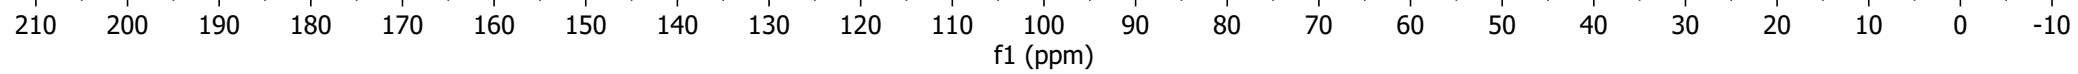

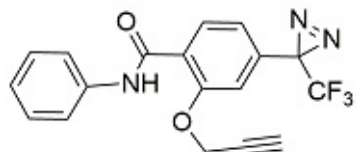

Ar-C

<sup>1</sup>H NMR (600 MHz, CDCl<sub>3</sub>)

9.60

8.33

8.31

7.69

7.69

7.68

7.67

7.67

7.38

7.38

7.37

7.37

7.36

7.36

7.35

7.35

7.26

7.26

7.16

7.16

7.16

7.15

7.15

7.15

7.14

7.14

7.13

7.13

7.13

6.98

6.98

6.98

6.98

6.97

6.97

6.96

6.86

6.85

4.93

4.91

4.91

2.74

2.74

2.73

2.73

2.73

1.58

-0.00

1.06

1.06

2.16

2.17

1.11

1.12

1.05

2.23

1.00

10.5 10.0 9.5 9.0 8.5 8.0 7.5 7.0 6.5 6.0 5.5 5.0 4.5 4.0 3.5 3.0 2.5 2.0 1.5 1.0 0.5 0.0

f1 (ppm)

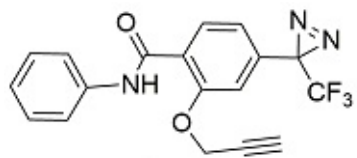

Ar-C

<sup>13</sup>C NMR (151 MHz, CDCl<sub>3</sub>)

161.63

155.17

138.04

134.04

133.39

129.05

129.04

124.53

123.80

122.72

120.90

120.42

120.34

111.05

77.89

77.23

77.01

76.80

76.24

57.65

28.75

28.49

28.21

27.95

210 200 190 180 170 160 150 140 130 120 110 100 90 80 70 60 50 40 30 20 10 0 -10

f1 (ppm)

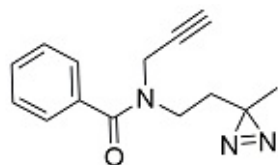

BD-C

<sup>1</sup>H NMR (400 MHz, DMSO-d<sub>6</sub> at 100 °C)

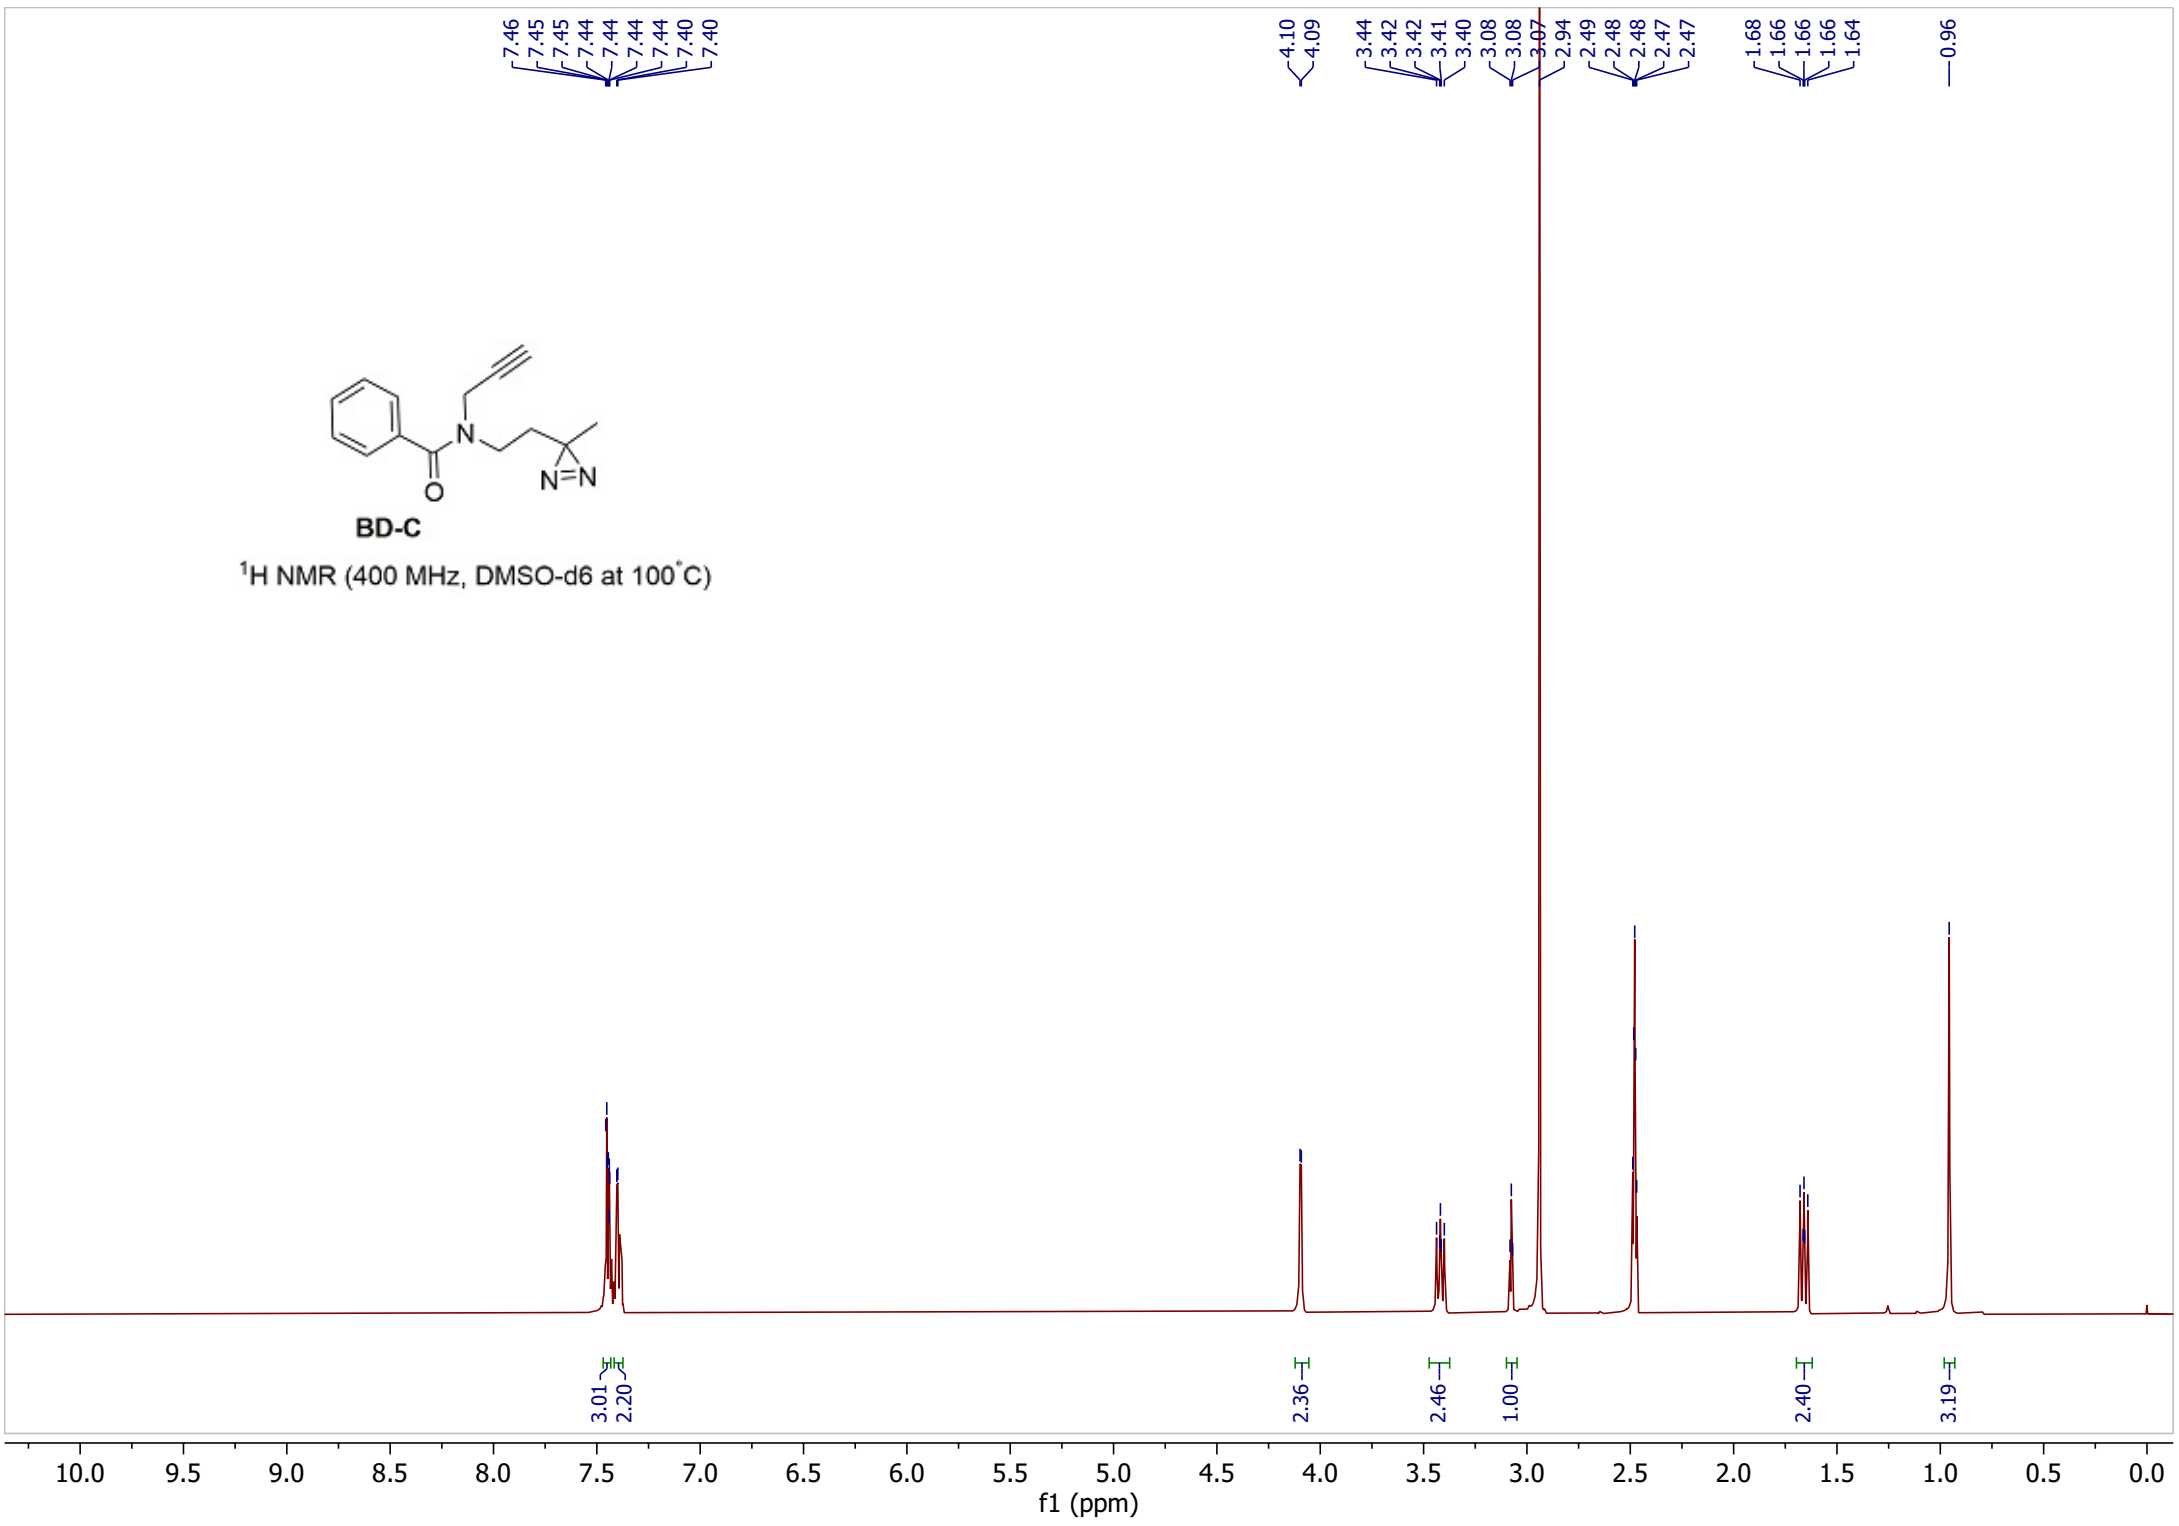



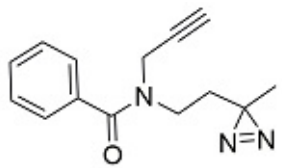

**BD-C**

<sup>13</sup>C NMR (400 MHz, CDCl<sub>3</sub>)

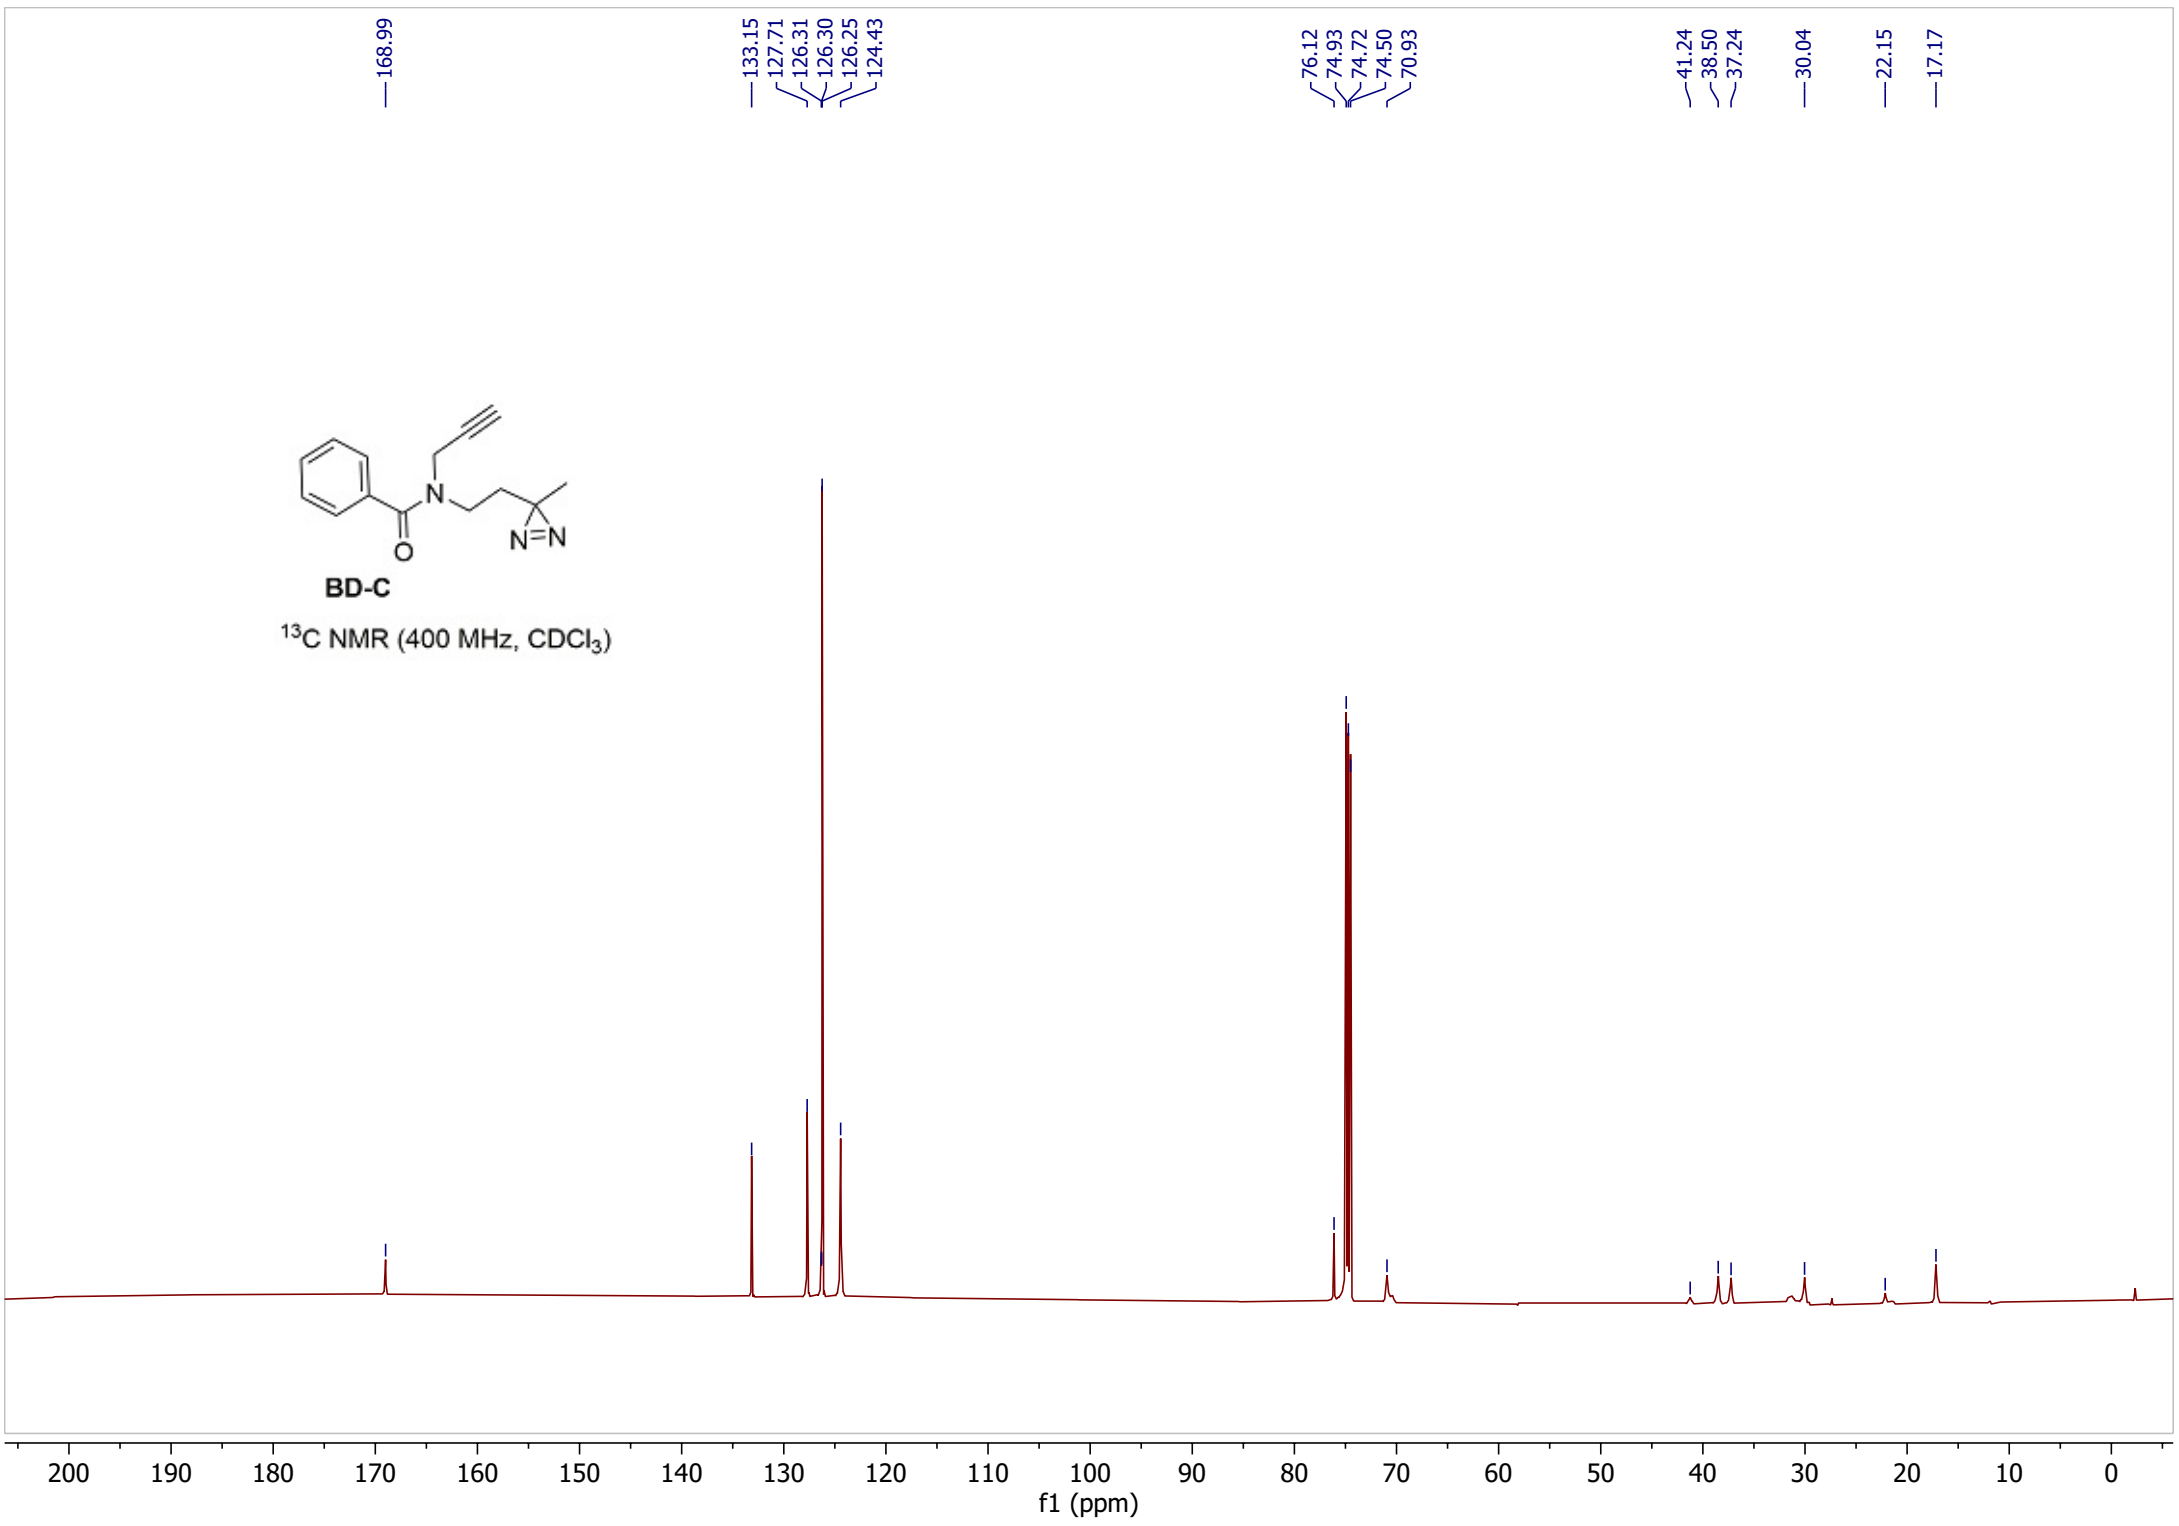

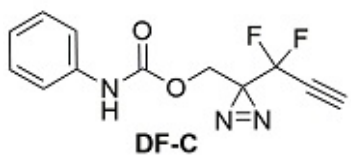

$^1\text{H NMR}$  (600 MHz,  $\text{CDCl}_3$ )

7.31  
7.29  
7.26  
7.25  
7.24  
7.23  
7.19  
7.04  
7.04  
7.03  
7.01  
6.64

4.30

2.94  
2.93  
2.93  
2.92

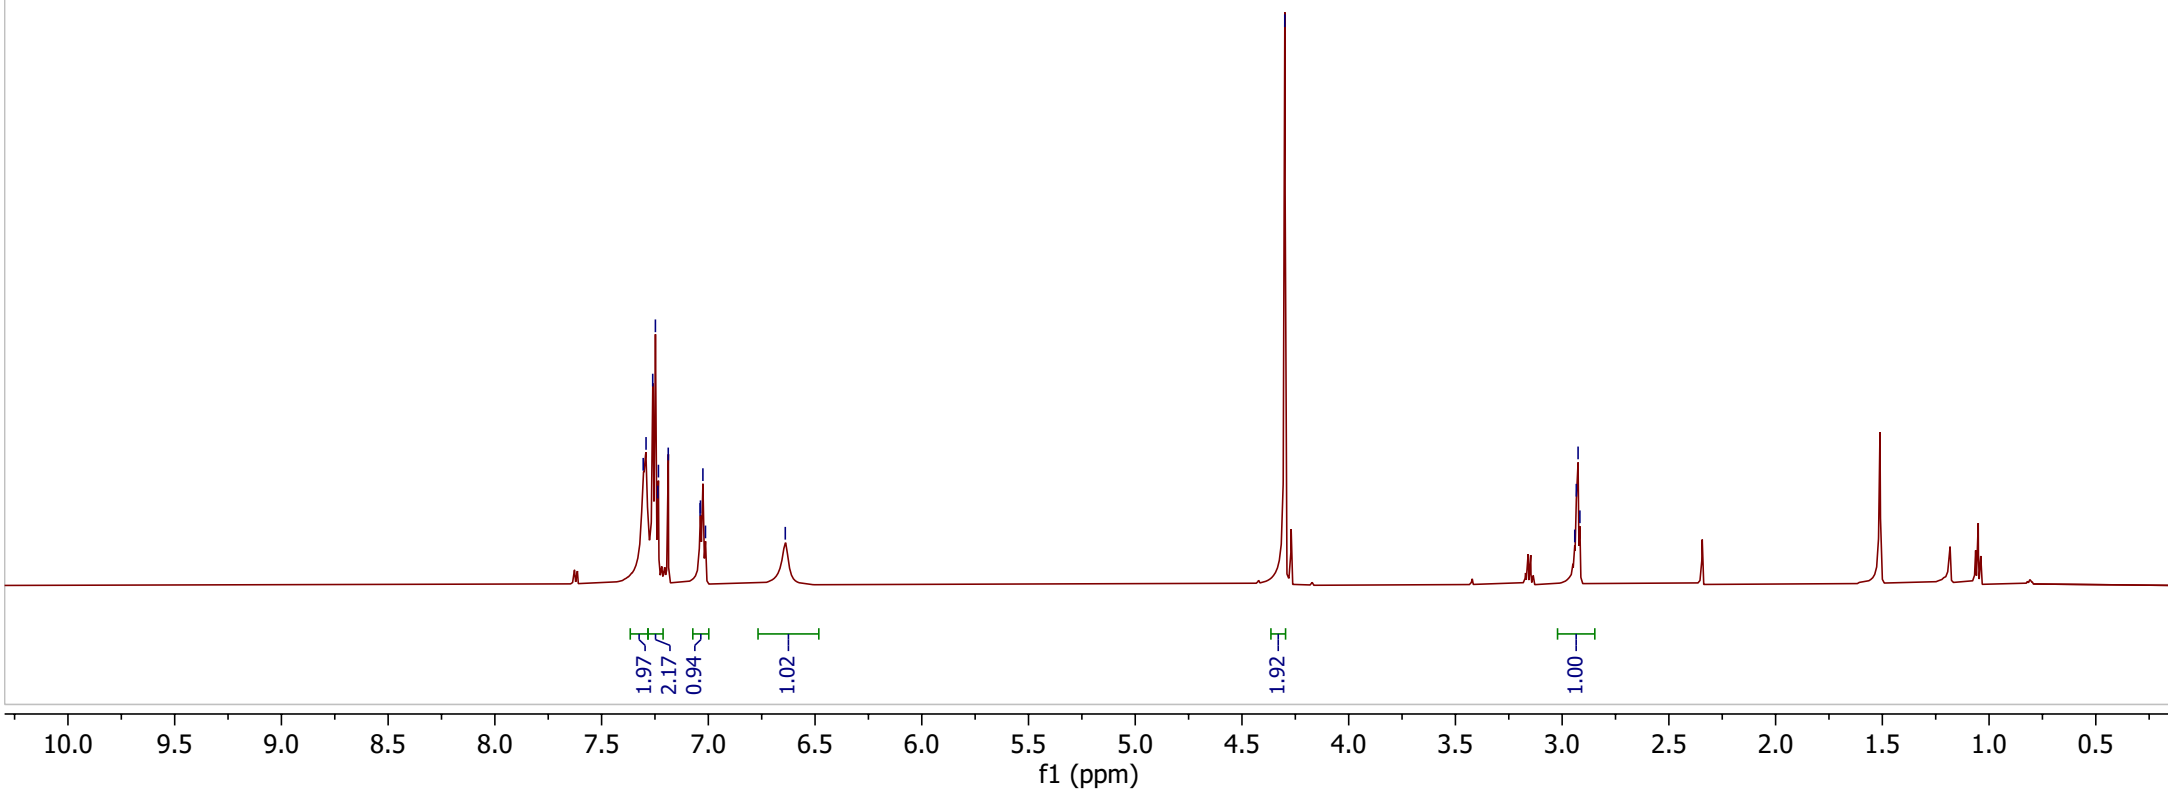

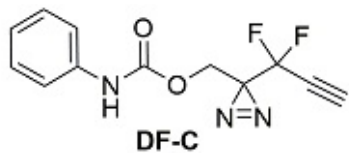

<sup>13</sup>C NMR (151 MHz, CDCl<sub>3</sub>)

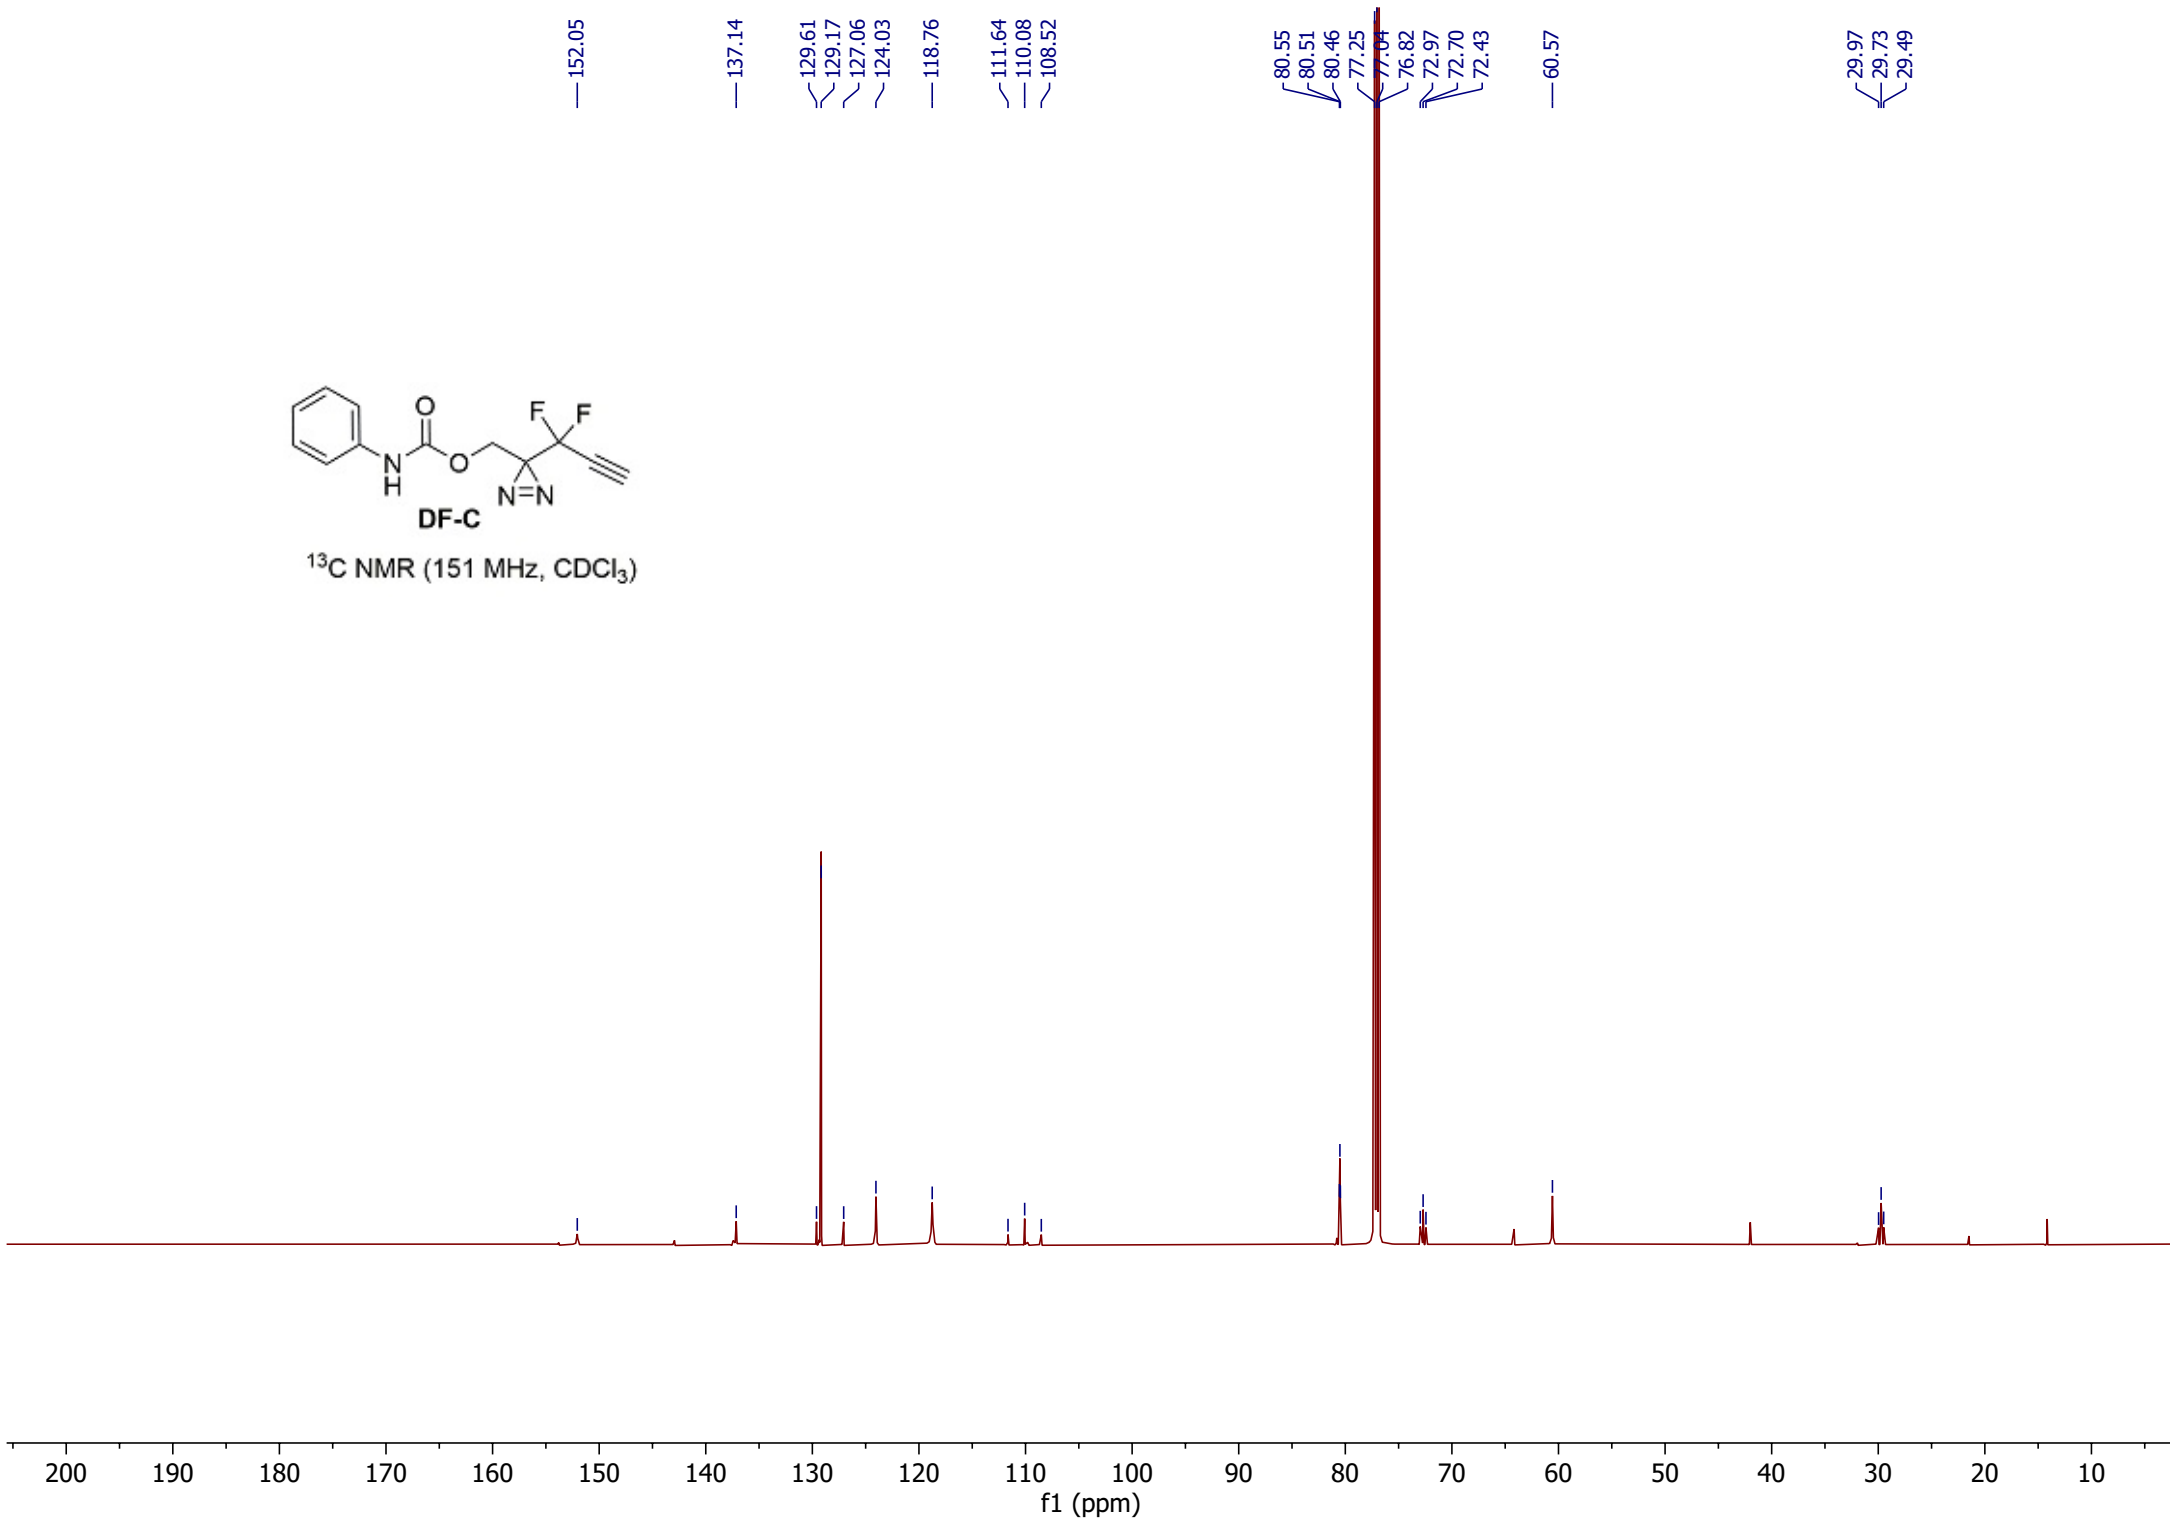

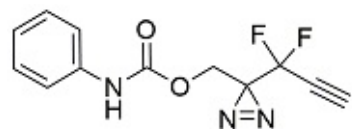

**DF-C**

$^{19}\text{F}$  NMR (565 MHz,  $\text{CDCl}_3$ )

-86.53  
-86.54

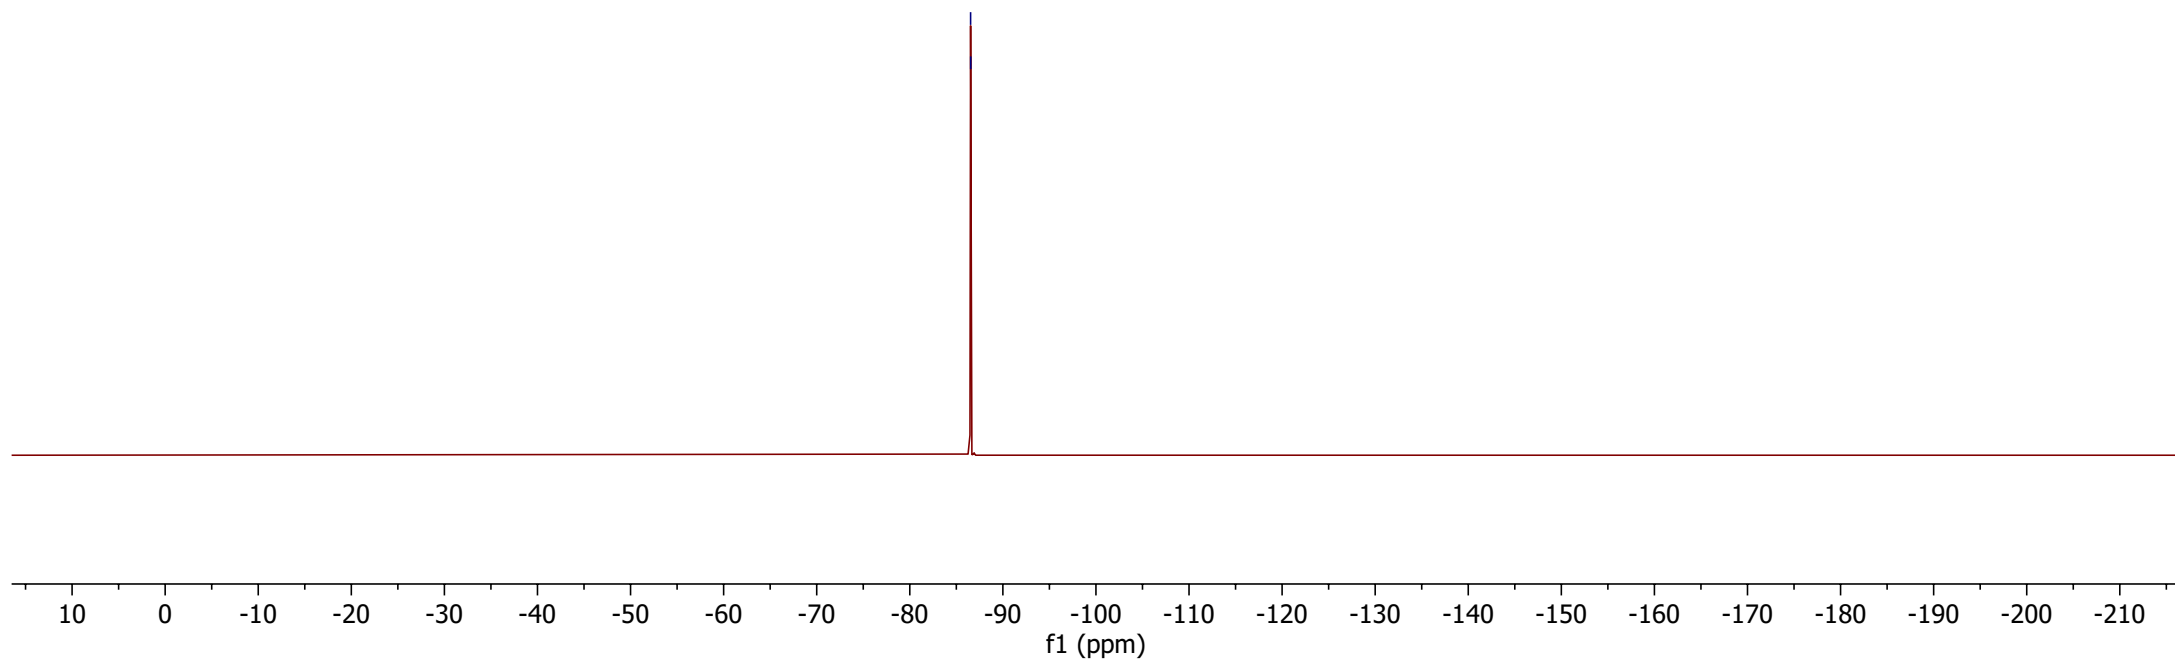

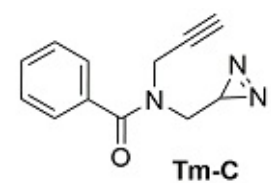

<sup>1</sup>H NMR (600 MHz, CDCl<sub>3</sub>)

7.44  
7.40  
7.40  
7.39  
7.38  
7.37  
7.37  
7.36  
7.35  
7.19  
7.19

4.40

4.00

3.47

2.28

1.50

1.21  
1.18

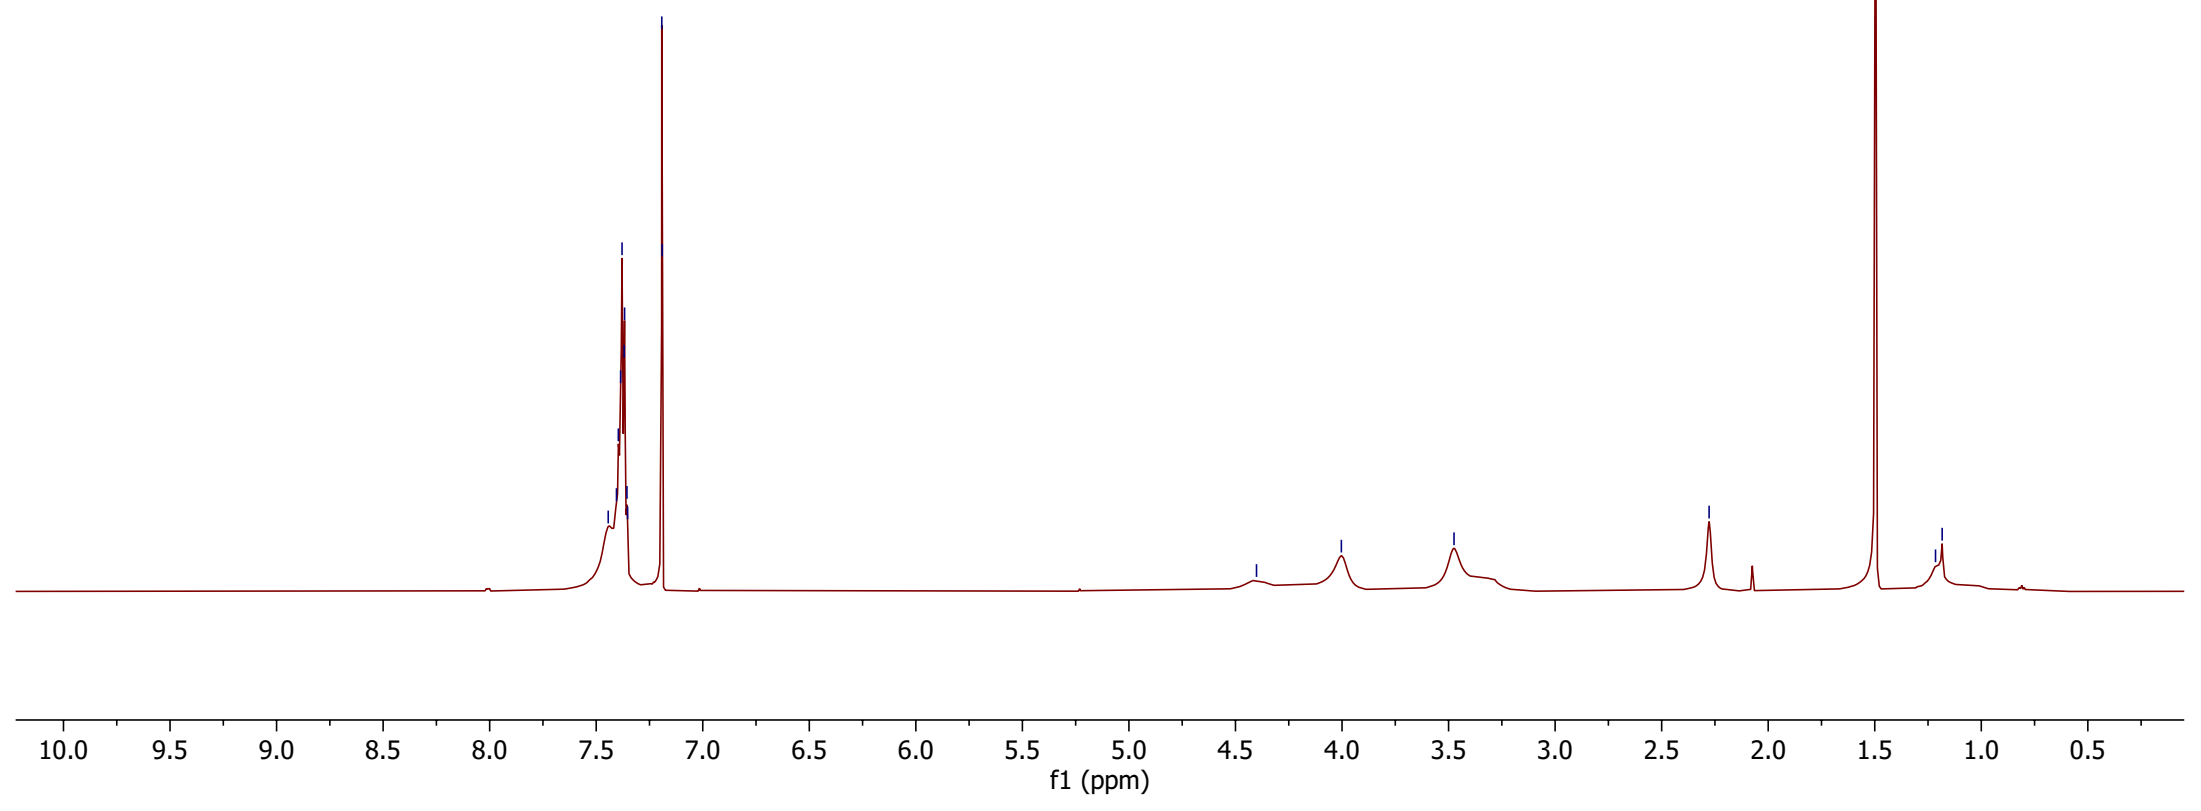

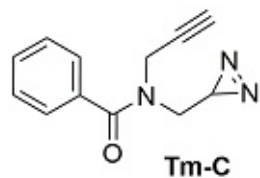

<sup>13</sup>C NMR (151 MHz, CDCl<sub>3</sub>)

—171.58

—134.69

—130.39

—128.67

—127.06

—78.02

—77.24

—77.03

—76.82

—73.53

—44.98

—40.27

—19.47

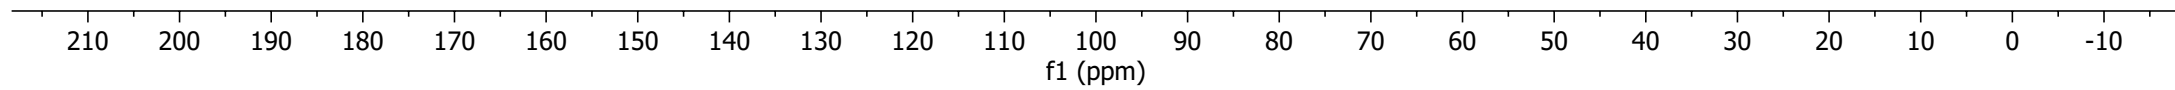

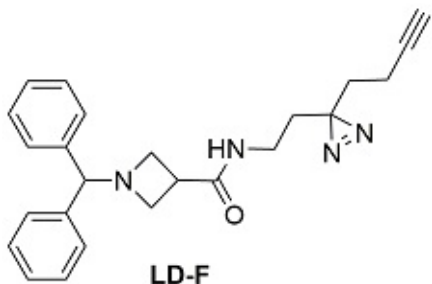

$^1\text{H}$  NMR (400 MHz,  $\text{CDCl}_3$ )

7.44  
7.43  
7.43  
7.42  
7.42  
7.41  
7.41  
7.30  
7.30  
7.29  
7.28  
7.28  
7.27  
7.26  
7.26  
7.22  
7.21  
7.21  
7.20  
7.20  
7.19  
7.18  
7.18  
7.17  
6.48

4.45  
3.41  
3.39  
3.37  
3.35  
3.35  
3.33  
3.33  
3.31  
3.18  
3.16  
3.15  
3.13  
3.13  
3.09  
3.08  
3.06  
3.04  
2.05  
2.03  
2.03  
2.02  
2.01  
1.99  
1.98  
1.97  
1.77  
1.75  
1.73  
1.68  
1.67  
1.66  
1.65  
1.64

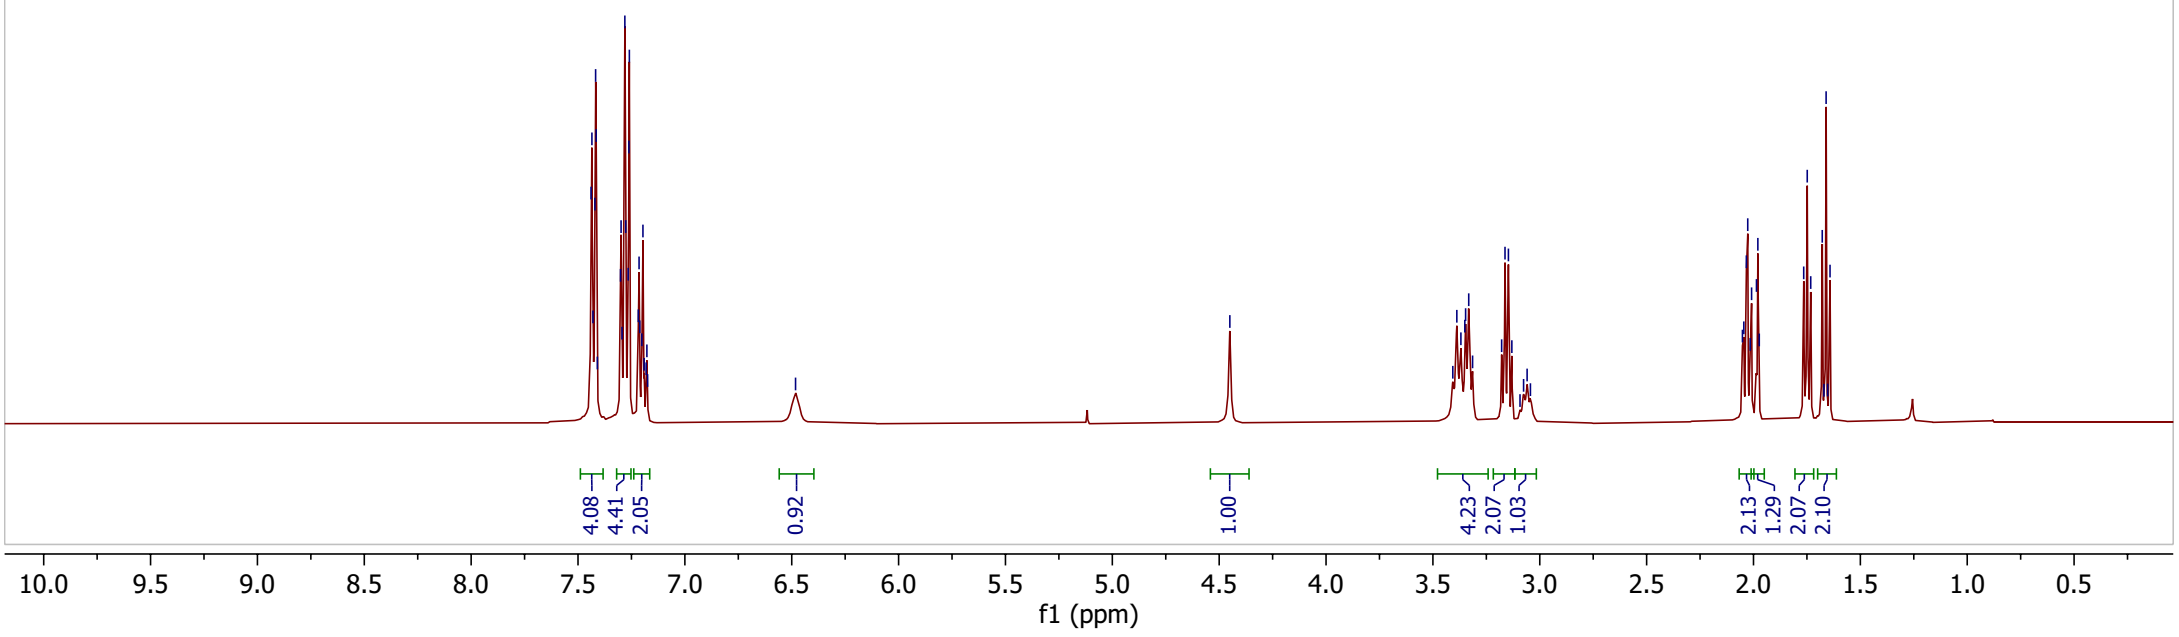

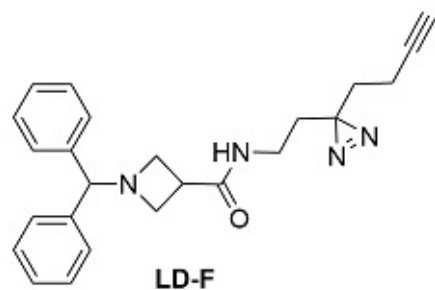

<sup>13</sup>C NMR (101 MHz, CDCl<sub>3</sub>)

—173.40

—141.51

128.55

127.47

127.29

82.65

77.63

77.39

77.28

77.07

76.76

69.50

—56.41

35.83

34.18

32.42

32.27

26.91

13.26

13.23

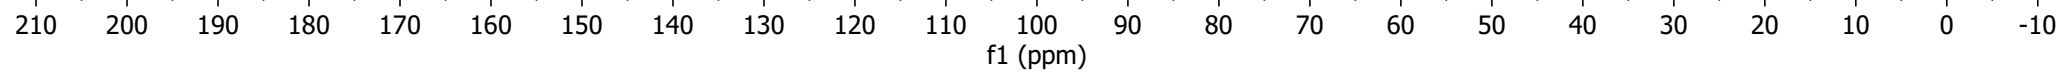



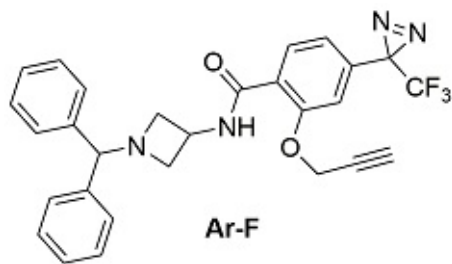

<sup>1</sup>H NMR (600 MHz, CDCl<sub>3</sub>)

8.19  
8.17  
8.04  
8.02  
7.43  
7.42  
7.40  
7.29  
7.27  
7.27  
7.26  
7.25  
7.21  
7.21  
7.20  
7.19  
7.19  
7.17  
7.17  
7.17  
6.92  
6.90  
6.81  
6.81

4.85  
4.85  
4.73  
4.71  
4.69  
4.68  
4.37

3.65  
3.63  
3.63  
3.61

3.00  
2.98  
2.98  
2.96  
2.68  
2.68  
2.67

1.00  
0.93

4.01  
4.53  
1.78

0.99  
0.98

1.96  
1.00

0.99

1.97

1.97

0.94

10.0 9.5 9.0 8.5 8.0 7.5 7.0 6.5 6.0 5.5 5.0 4.5 4.0 3.5 3.0 2.5 2.0 1.5 1.0 0.5

f1 (ppm)

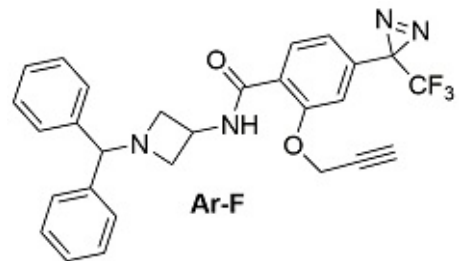

$^{13}\text{C}$  NMR (151 MHz,  $\text{CDCl}_3$ )

— 163.27 — 155.42 — 141.87 — 133.68 — 133.09 — 128.46 — 127.40 — 127.21 — 123.28 — 122.71 — 120.89 — 120.21 — 110.96 — 78.14 — 77.59 — 77.21 — 77.00 — 76.79 — 76.46 — 60.92 — 57.46 — 40.57 — 28.72 — 28.45 — 28.18 — 27.92

210 200 190 180 170 160 150 140 130 120 110 100 90 80 70 60 50 40 30 20 10 0 -10

f1 (ppm)

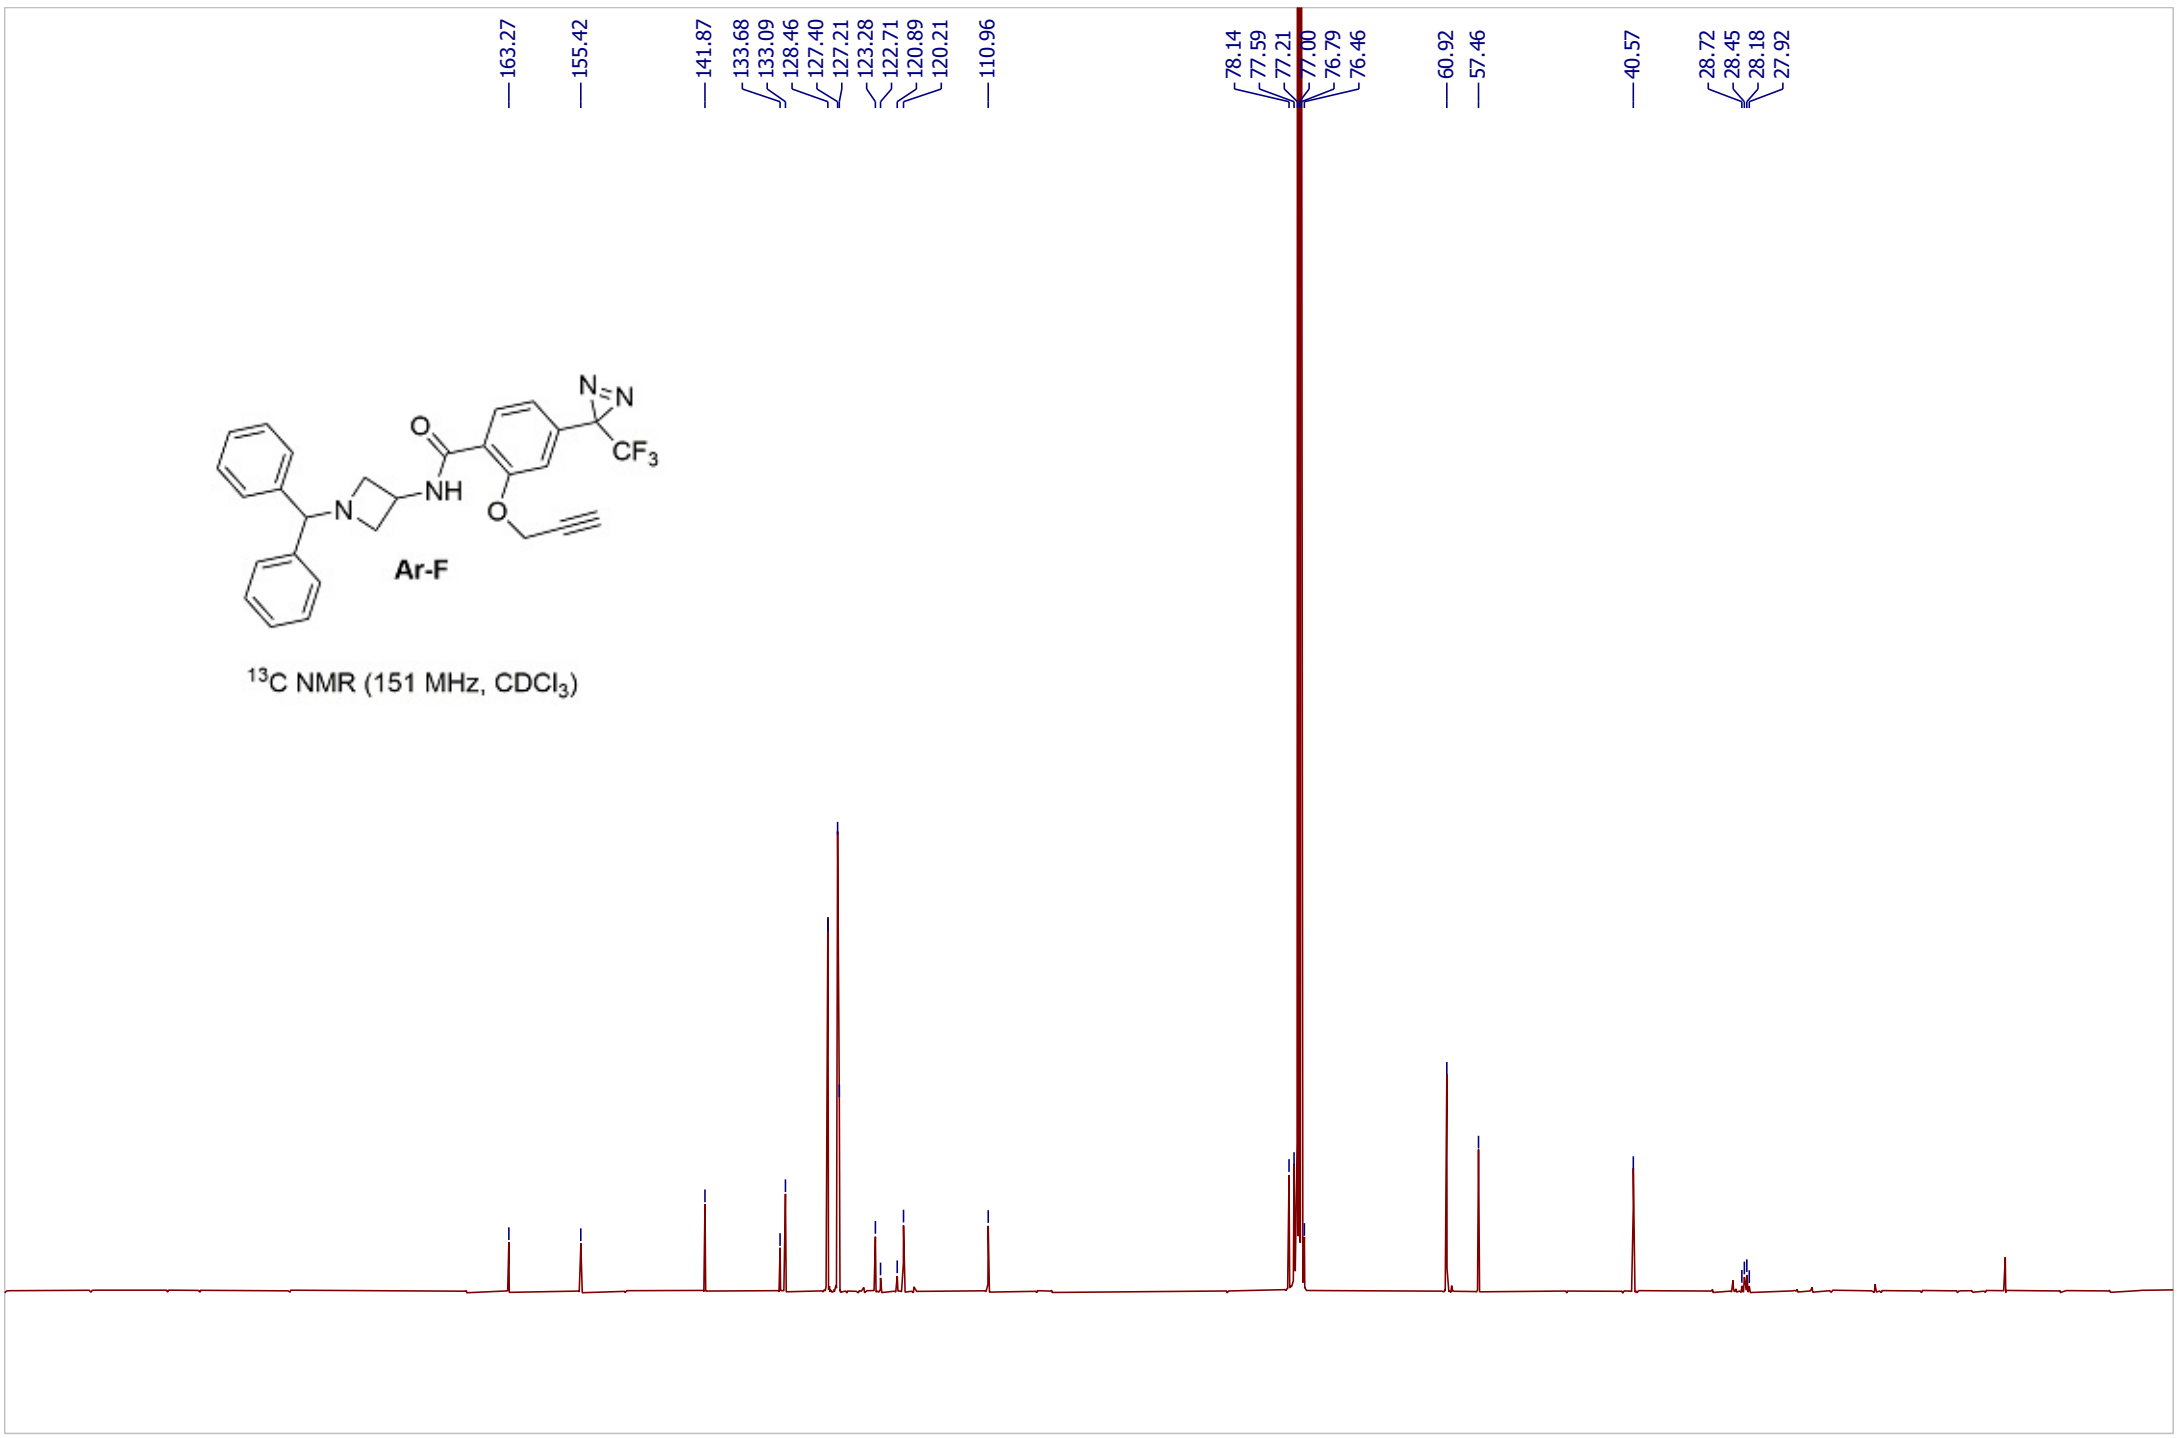

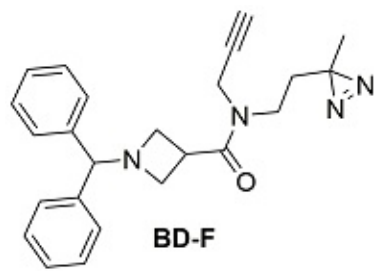

<sup>1</sup>H NMR (600 MHz, CDCl<sub>3</sub>)

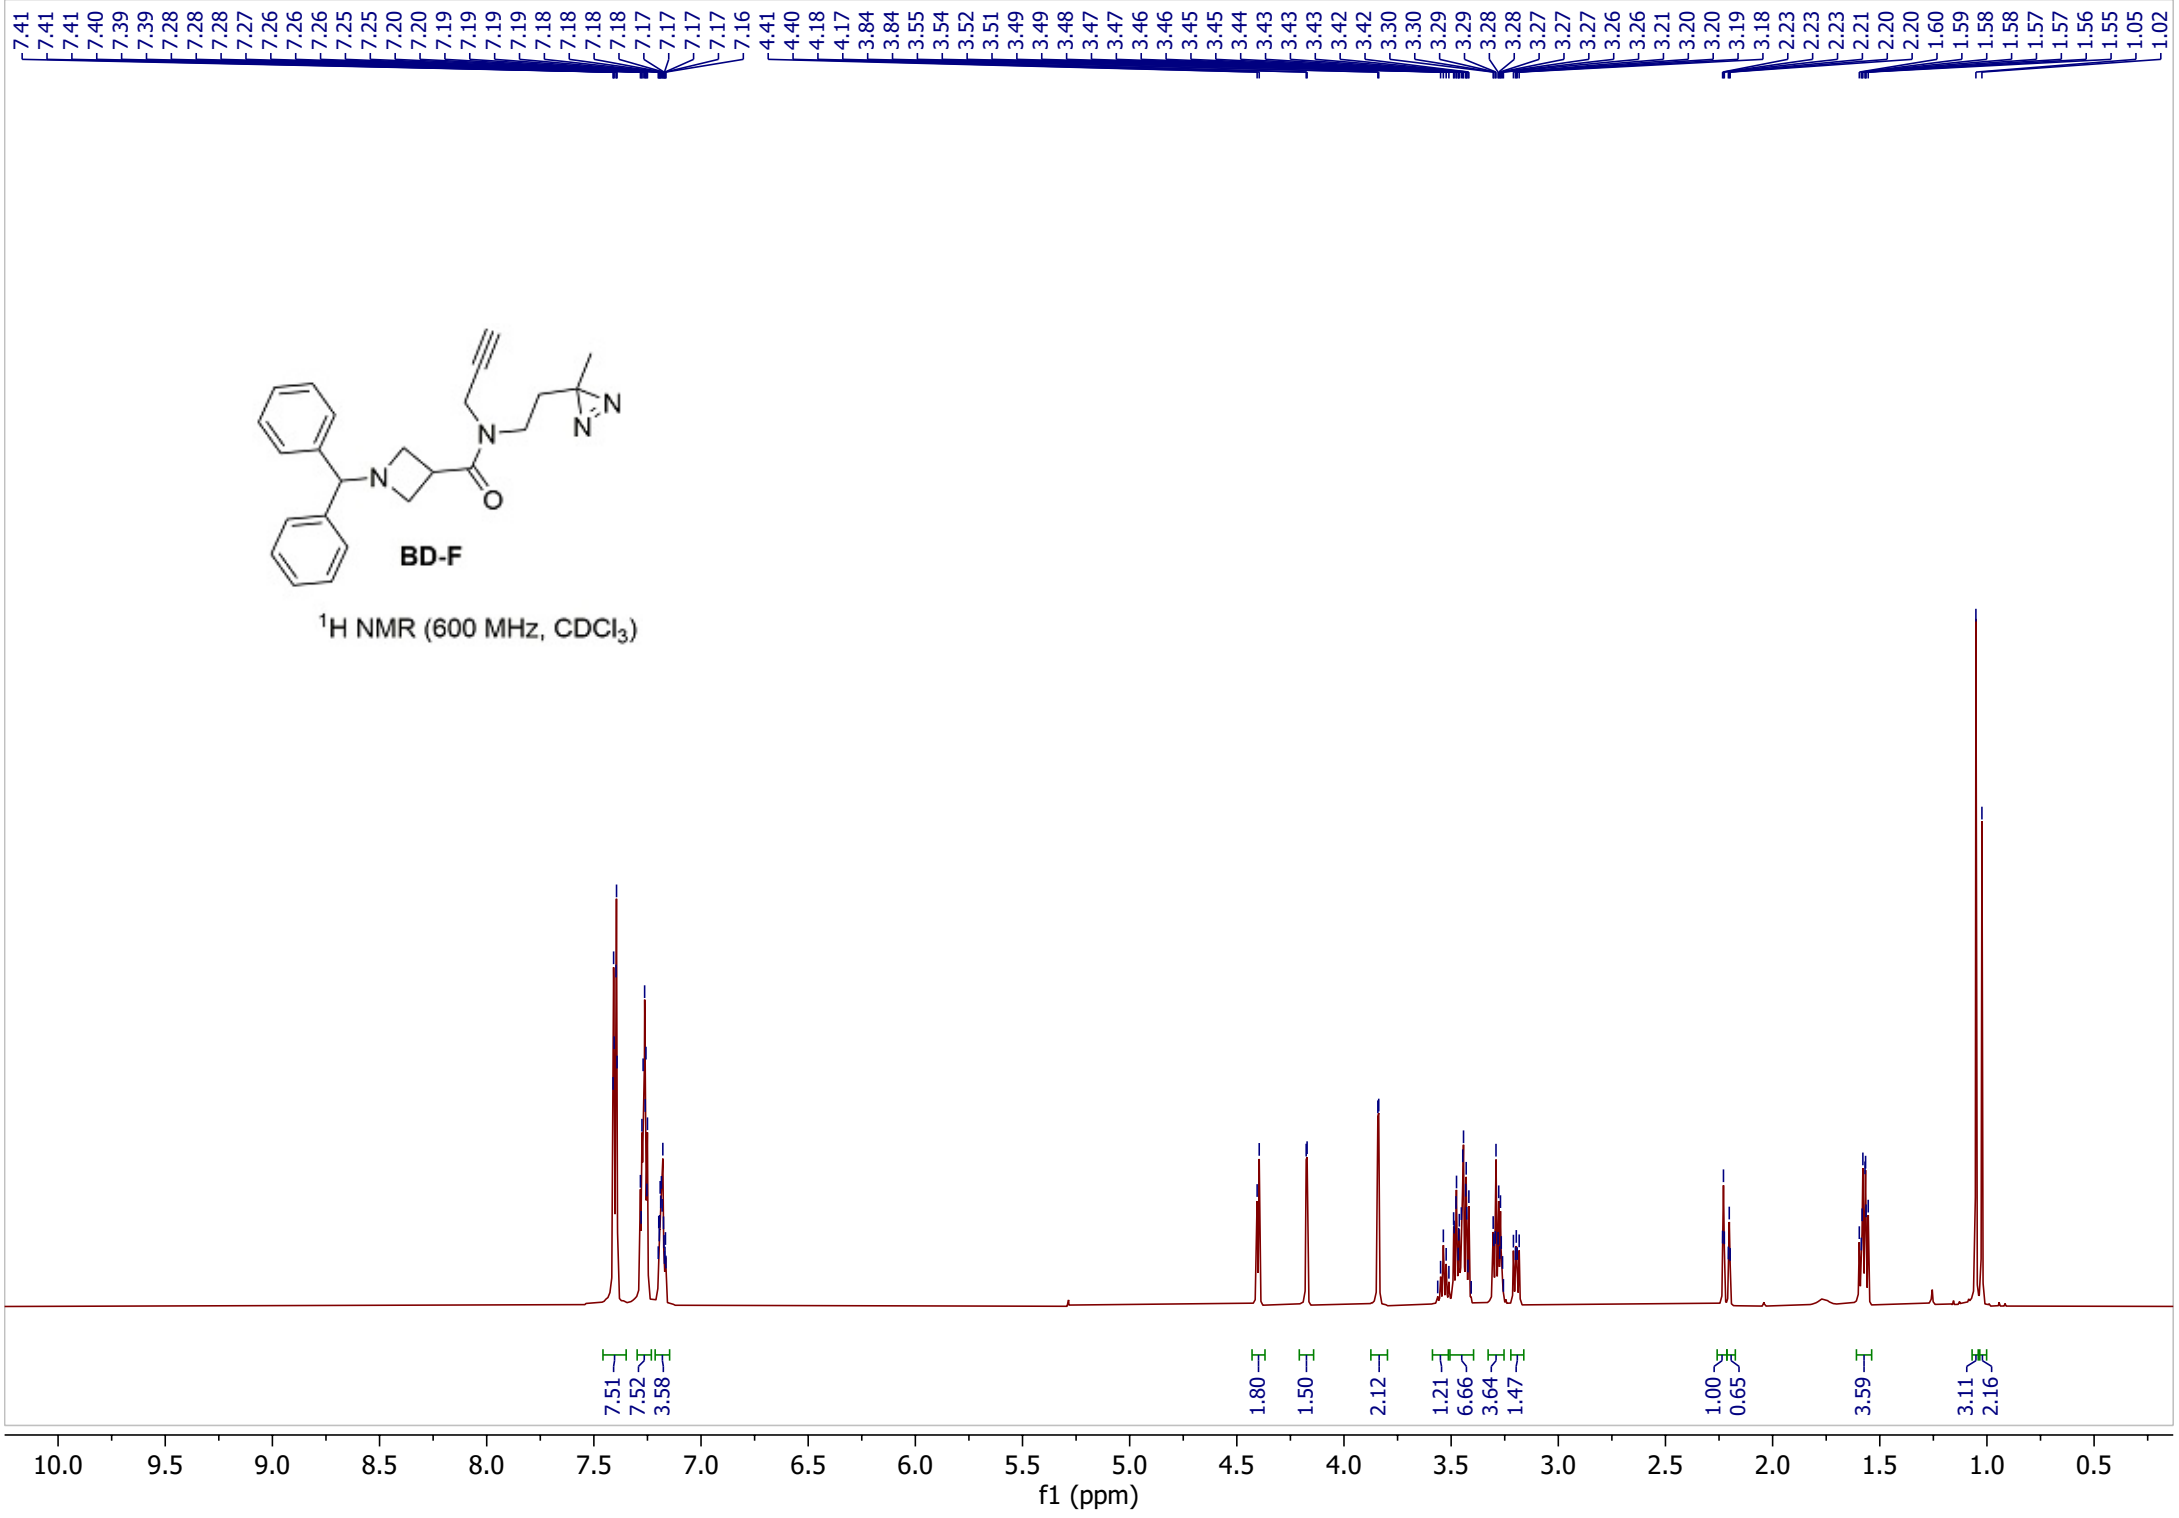

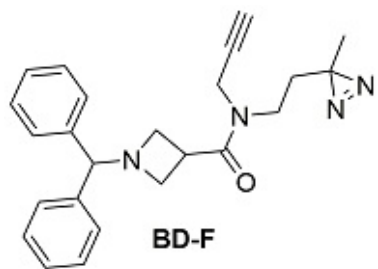

$^{13}\text{C}$  NMR (151 MHz,  $\text{CDCl}_3$ )

171.96  
171.50

141.74  
141.65

128.50  
128.47  
127.49  
127.22  
127.17

78.50  
78.05  
77.72  
77.25  
77.04  
76.88  
76.82  
73.09  
72.33

55.82  
55.73

41.66  
41.64  
41.63  
37.21  
34.20  
33.69  
32.60  
32.53  
32.14  
24.32  
23.75  
19.79  
19.55

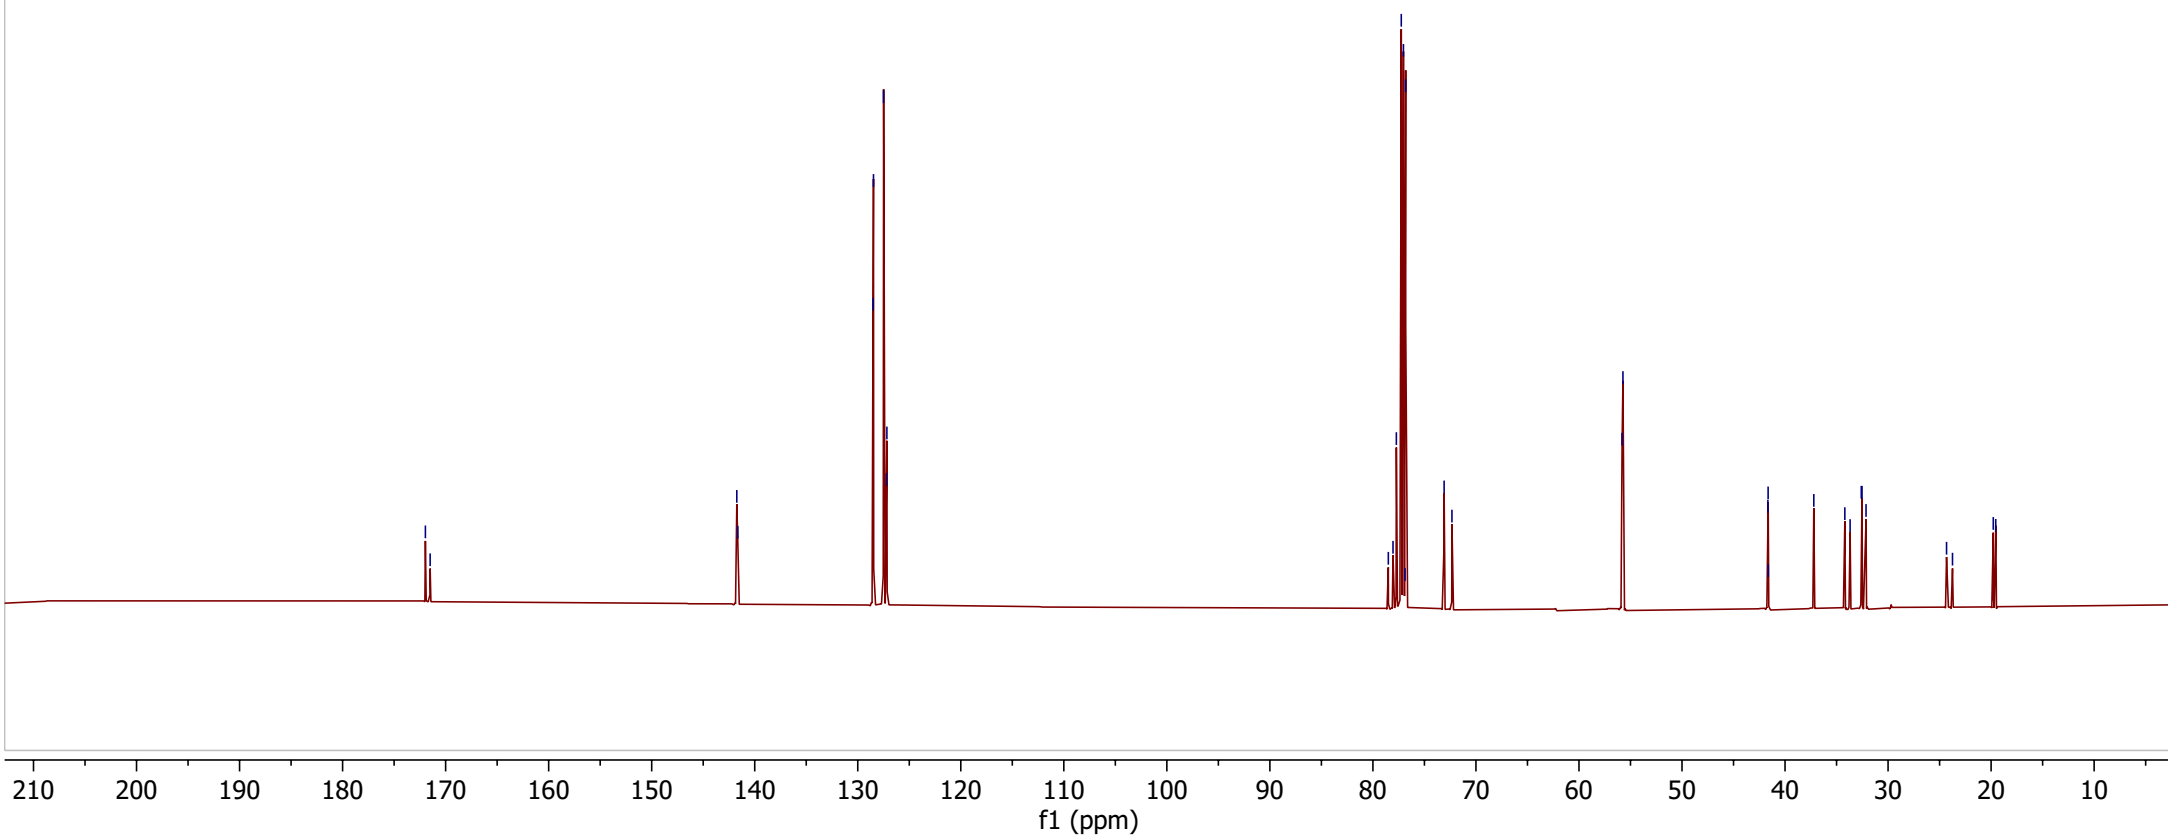

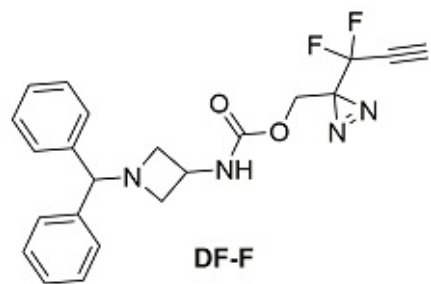

$^1\text{H}$  NMR (600 MHz,  $\text{CDCl}_3$ )

7.38  
7.37  
7.28  
7.26  
7.25  
7.25  
7.19  
7.18  
7.17

5.22  
5.20

4.30  
4.29  
4.28  
4.27  
4.26  
4.24

3.51  
3.50  
3.50

3.49

2.97

2.96

2.95

2.88

2.87

2.87  
2.86

4.32  
3.84  
2.23

1.00

1.78  
2.92

2.48

1.08  
1.42

10.0 9.5 9.0 8.5 8.0 7.5 7.0 6.5 6.0 5.5 5.0 4.5 4.0 3.5 3.0 2.5 2.0 1.5 1.0 0.5

f1 (ppm)

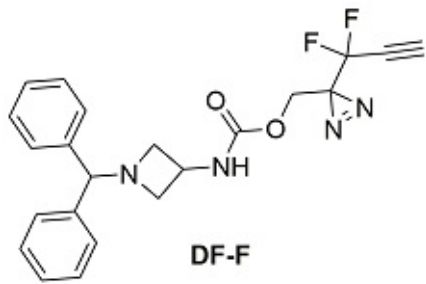

$^{13}\text{C}$  NMR (151 MHz,  $\text{CDCl}_3$ )

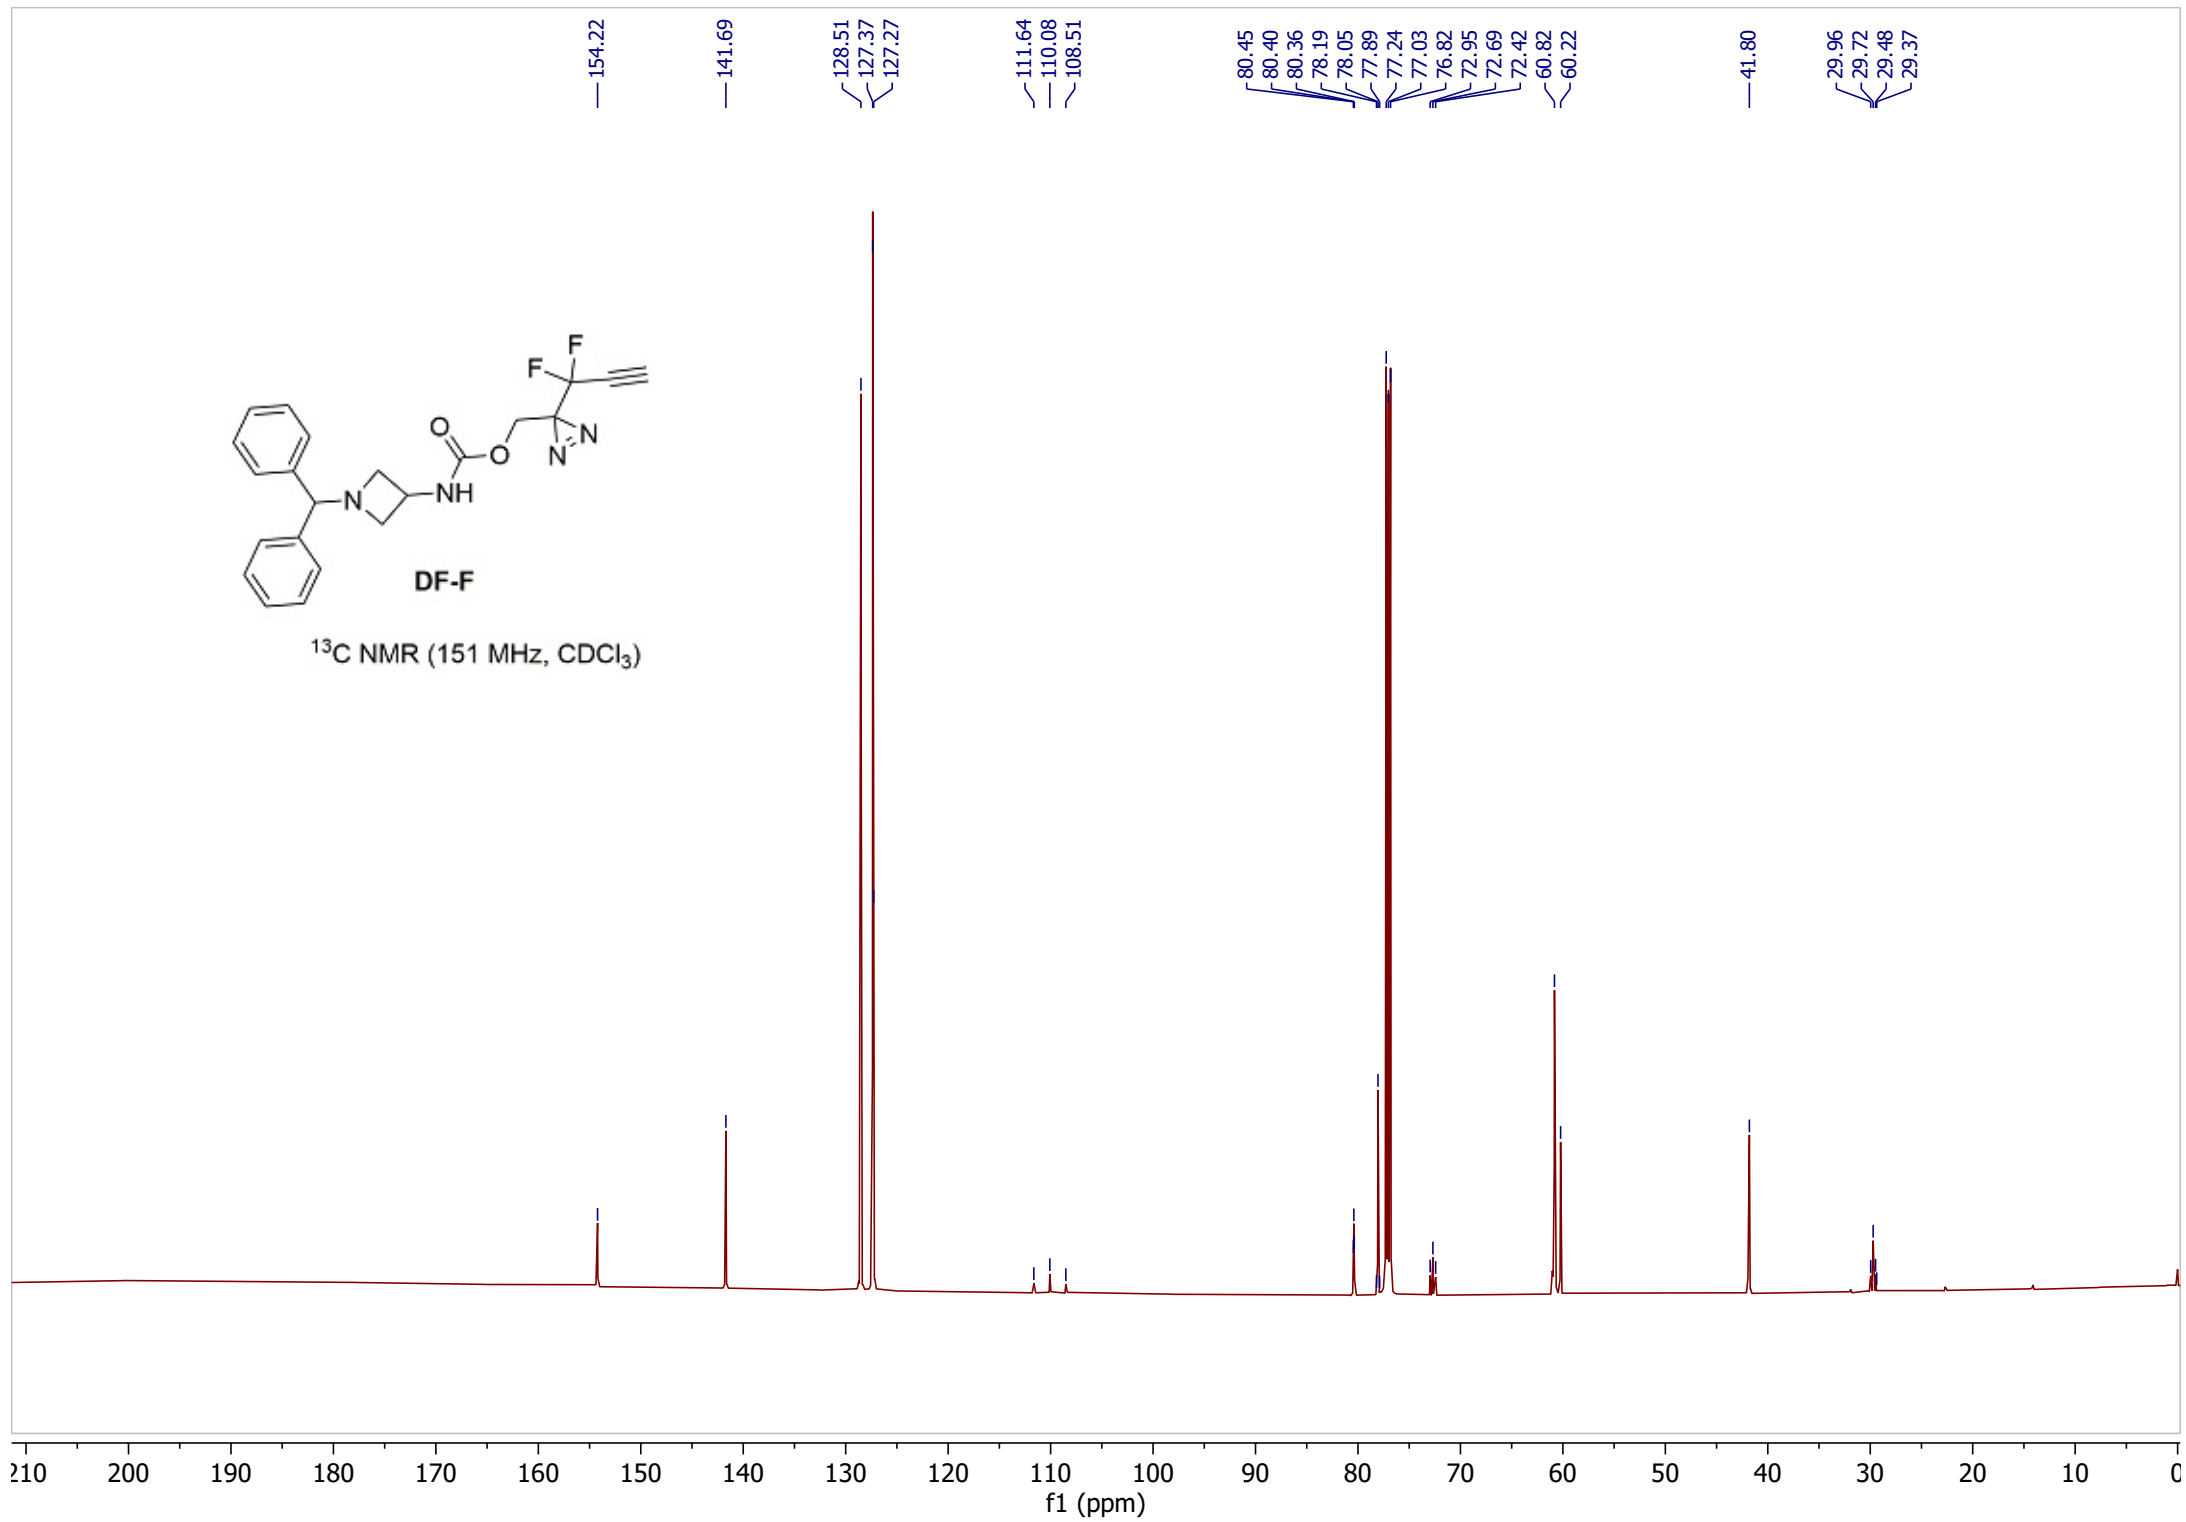

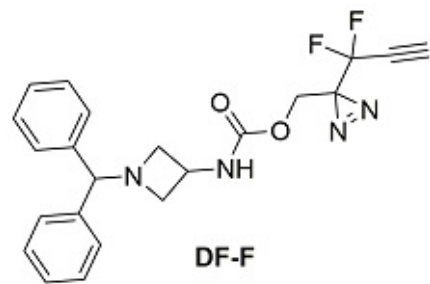

<sup>19</sup>F NMR (376 MHz, CDCl<sub>3</sub>)

86.58  
86.60

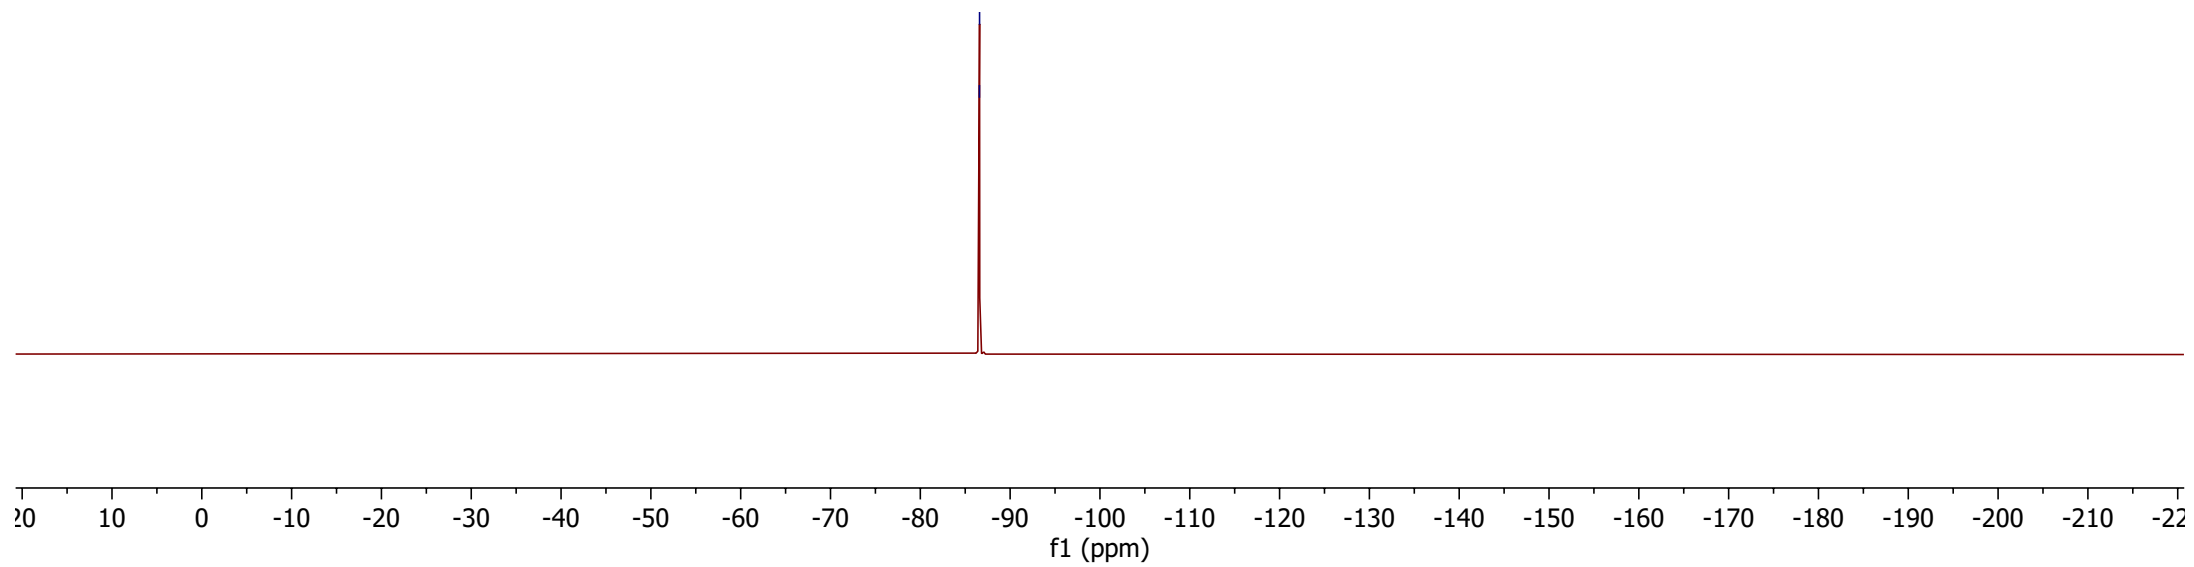

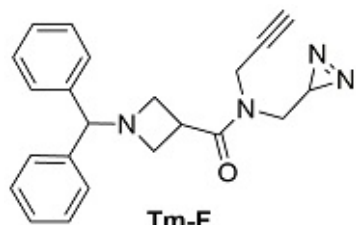

$^1\text{H NMR}$  (400 MHz,  $\text{CDCl}_3$ )

7.45  
7.44  
7.44  
7.42  
7.42  
7.32  
7.31  
7.30  
7.29  
7.28  
7.28  
7.23  
7.23  
7.23  
7.22  
7.21  
7.20  
7.19

4.43  
4.42  
4.28  
4.28  
3.93  
3.92  
3.57  
3.55  
3.53  
3.53  
3.52  
3.51  
3.51  
3.50  
3.49  
3.47  
3.41  
3.39  
3.38  
3.33  
3.32  
3.31  
3.30  
3.30  
3.28  
3.28  
3.26  
3.26  
2.30  
2.30  
2.29  
2.25  
1.15  
1.14  
1.13  
1.07  
1.06  
1.05

6.45  
6.76  
3.25

1.60  
1.33  
1.84  
4.25  
2.27  
2.97  
1.68

0.87  
0.65

1.00  
0.68

10.0 9.5 9.0 8.5 8.0 7.5 7.0 6.5 6.0 5.5 5.0 4.5 4.0 3.5 3.0 2.5 2.0 1.5 1.0 0.5 0.

f1 (ppm)



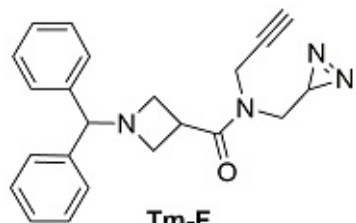

<sup>13</sup>C NMR (101 MHz, CDCl<sub>3</sub>)

172.31  
171.73

141.70  
141.64

128.52  
127.51  
127.24

77.73  
77.48  
77.37  
77.05  
76.74  
73.48  
72.69

55.76

45.80  
45.52

37.80  
34.93  
32.34  
32.25

19.51  
19.45

210 200 190 180 170 160 150 140 130 120 110 100 90 80 70 60 50 40 30 20 10 0 -10

f1 (ppm)

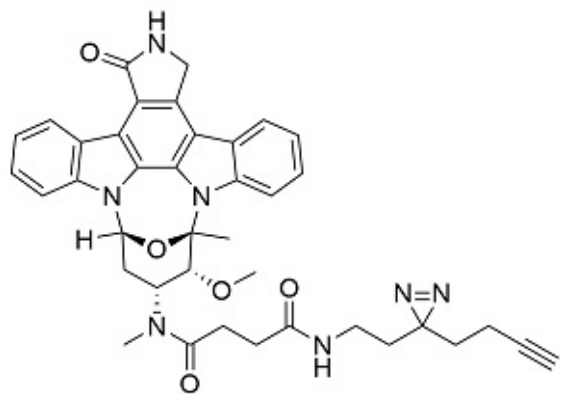

**LD-St**

<sup>1</sup>H NMR (600 MHz, CDCl<sub>3</sub>)

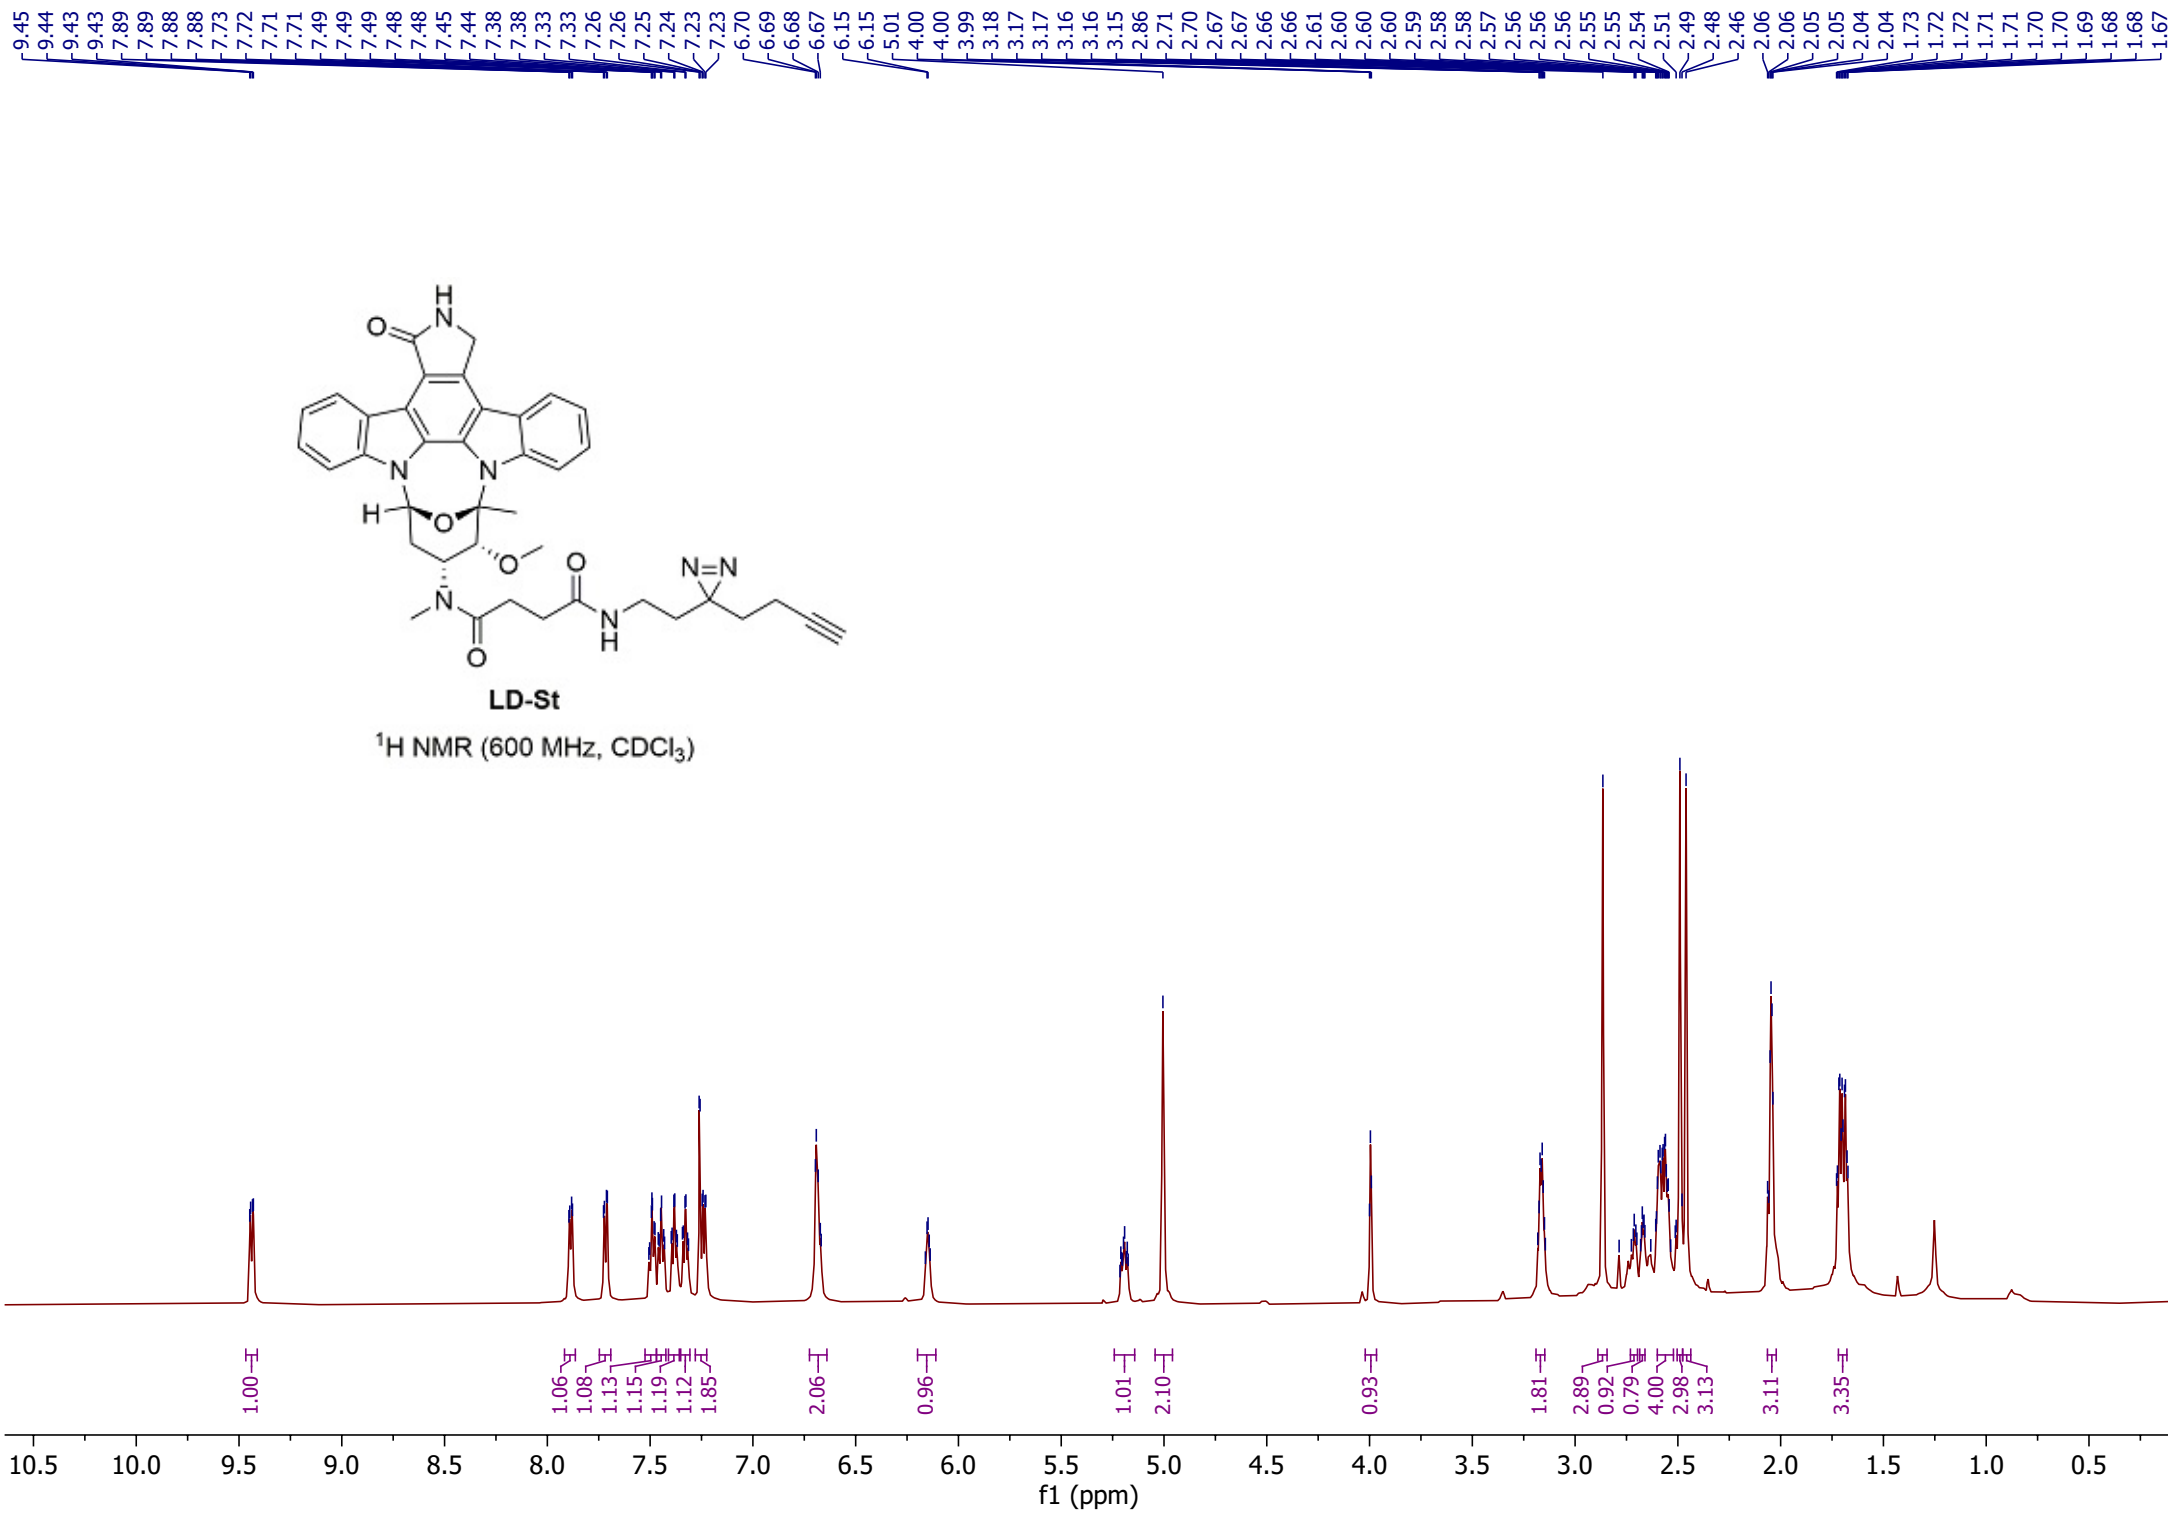

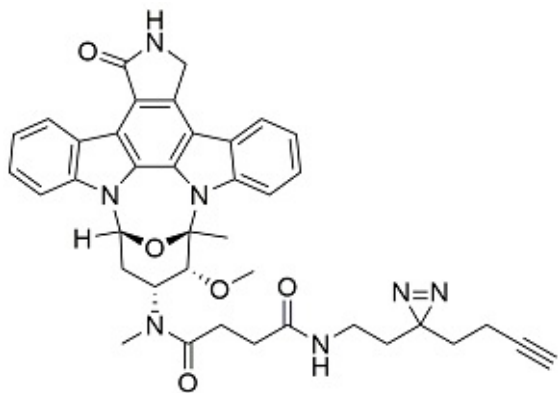

LD-St

$^{13}\text{C}$  NMR (151 MHz,  $\text{CDCl}_3$ )

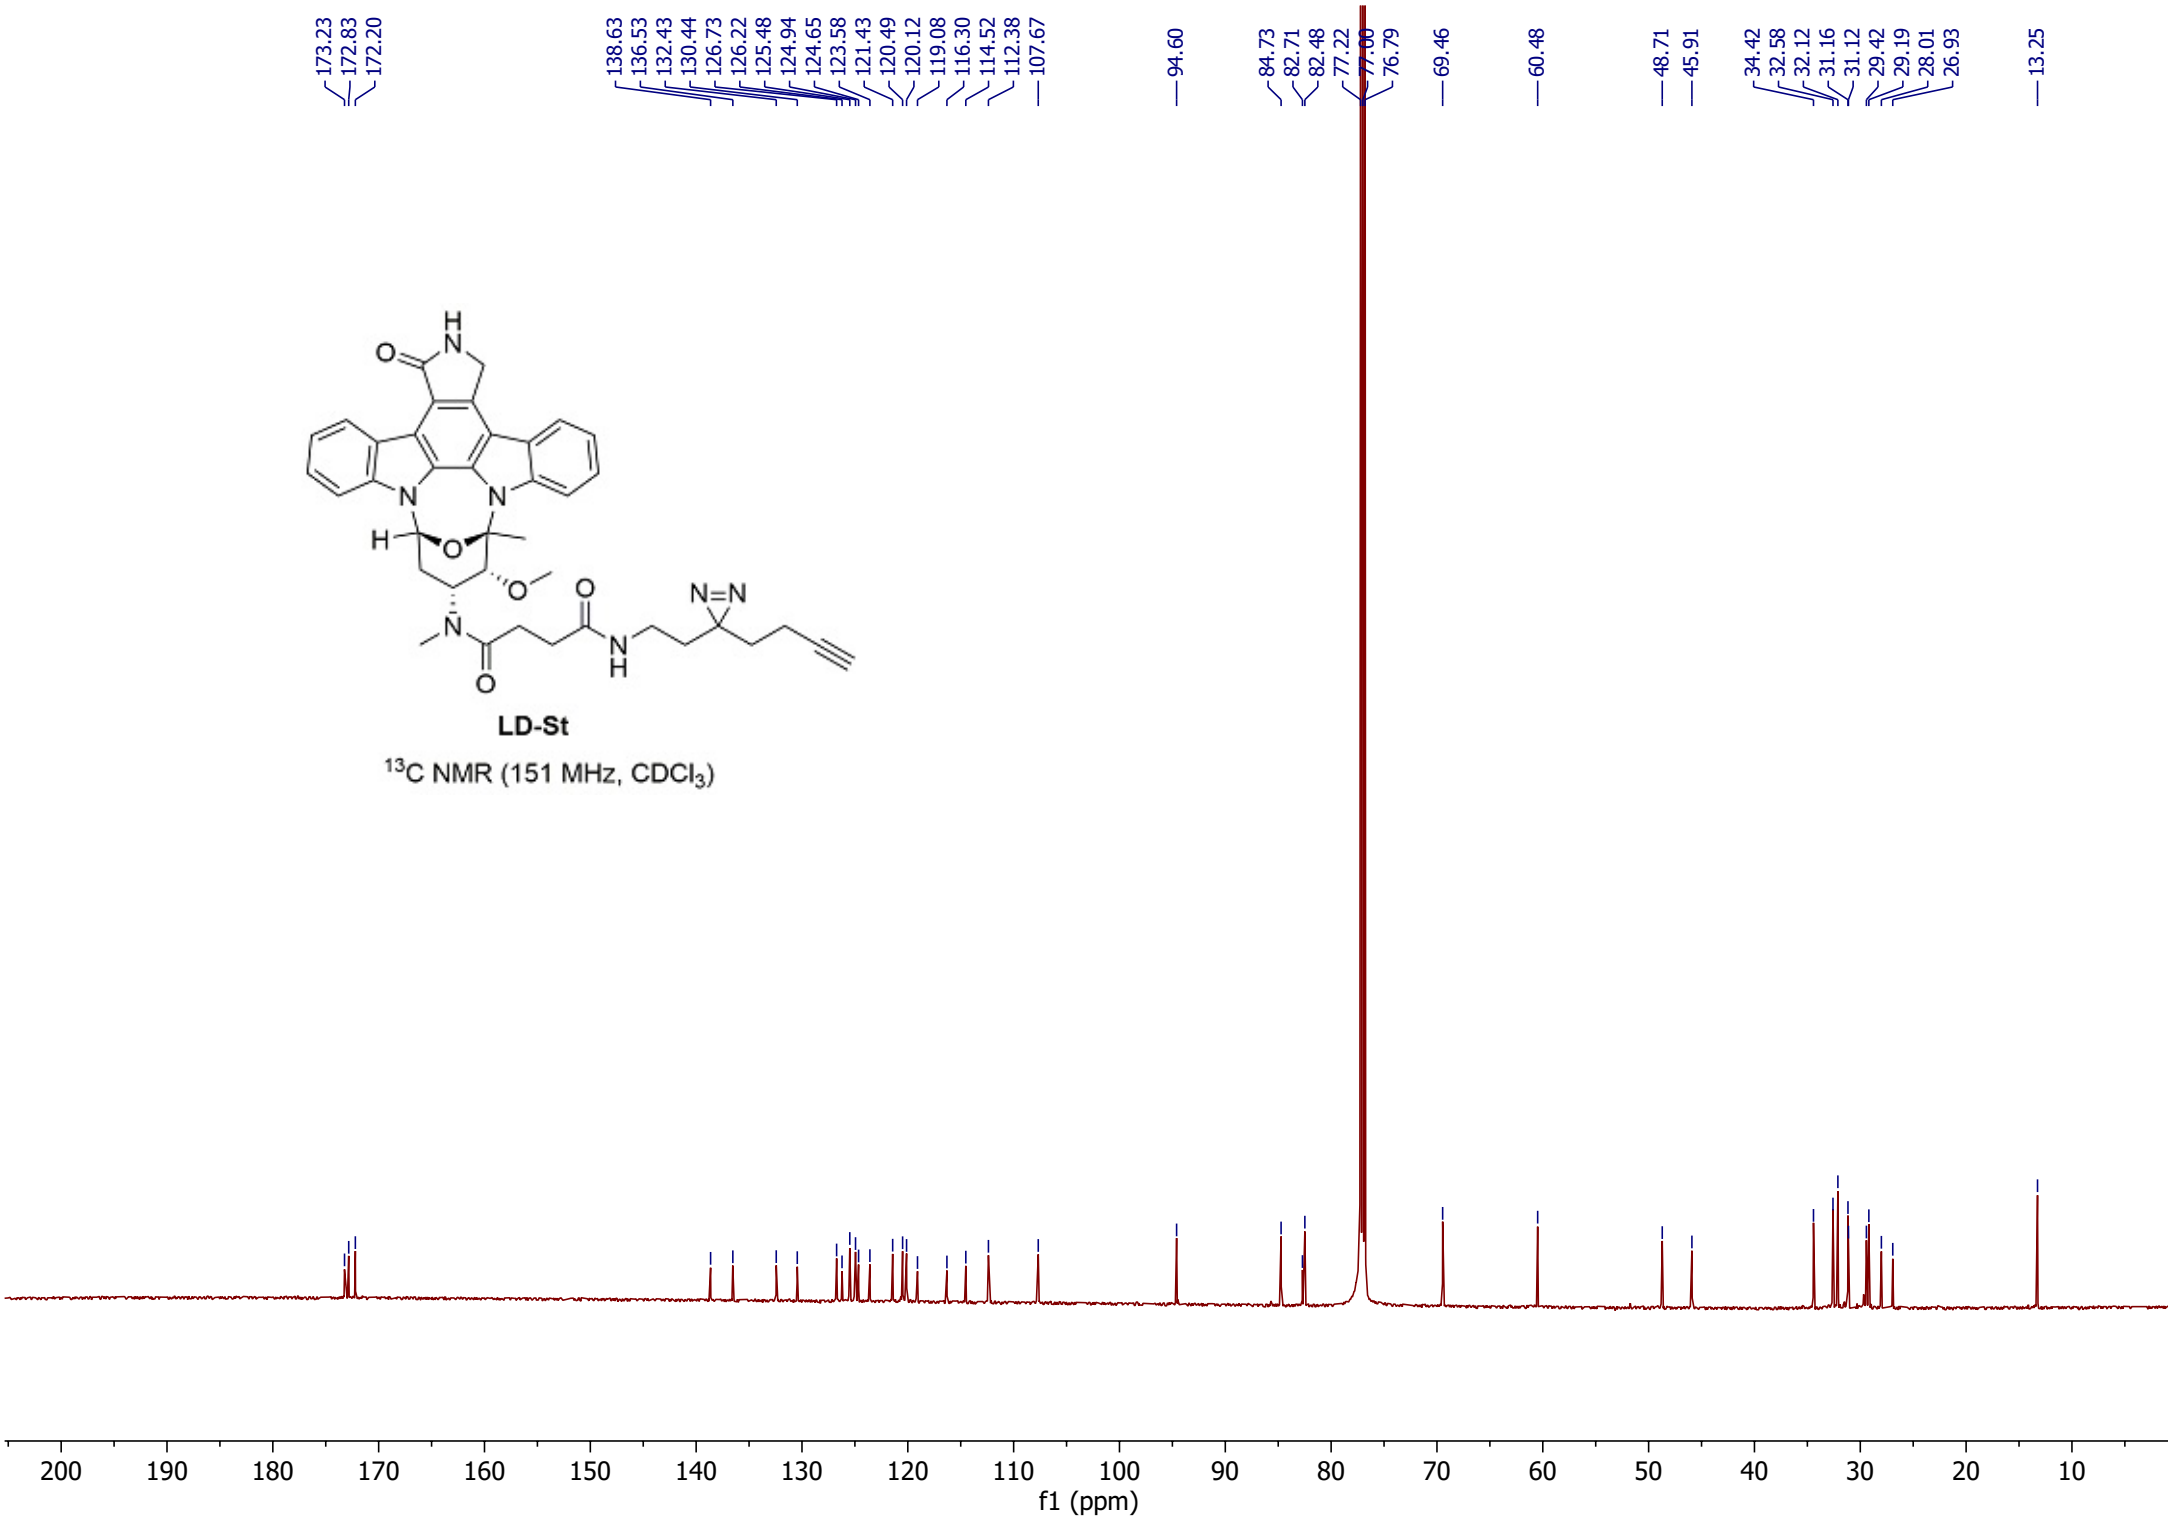

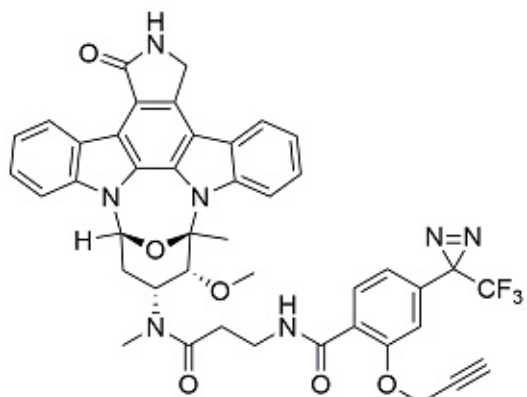

Ar-St

$^1\text{H}$  NMR (600 MHz,  $\text{CDCl}_3$ )

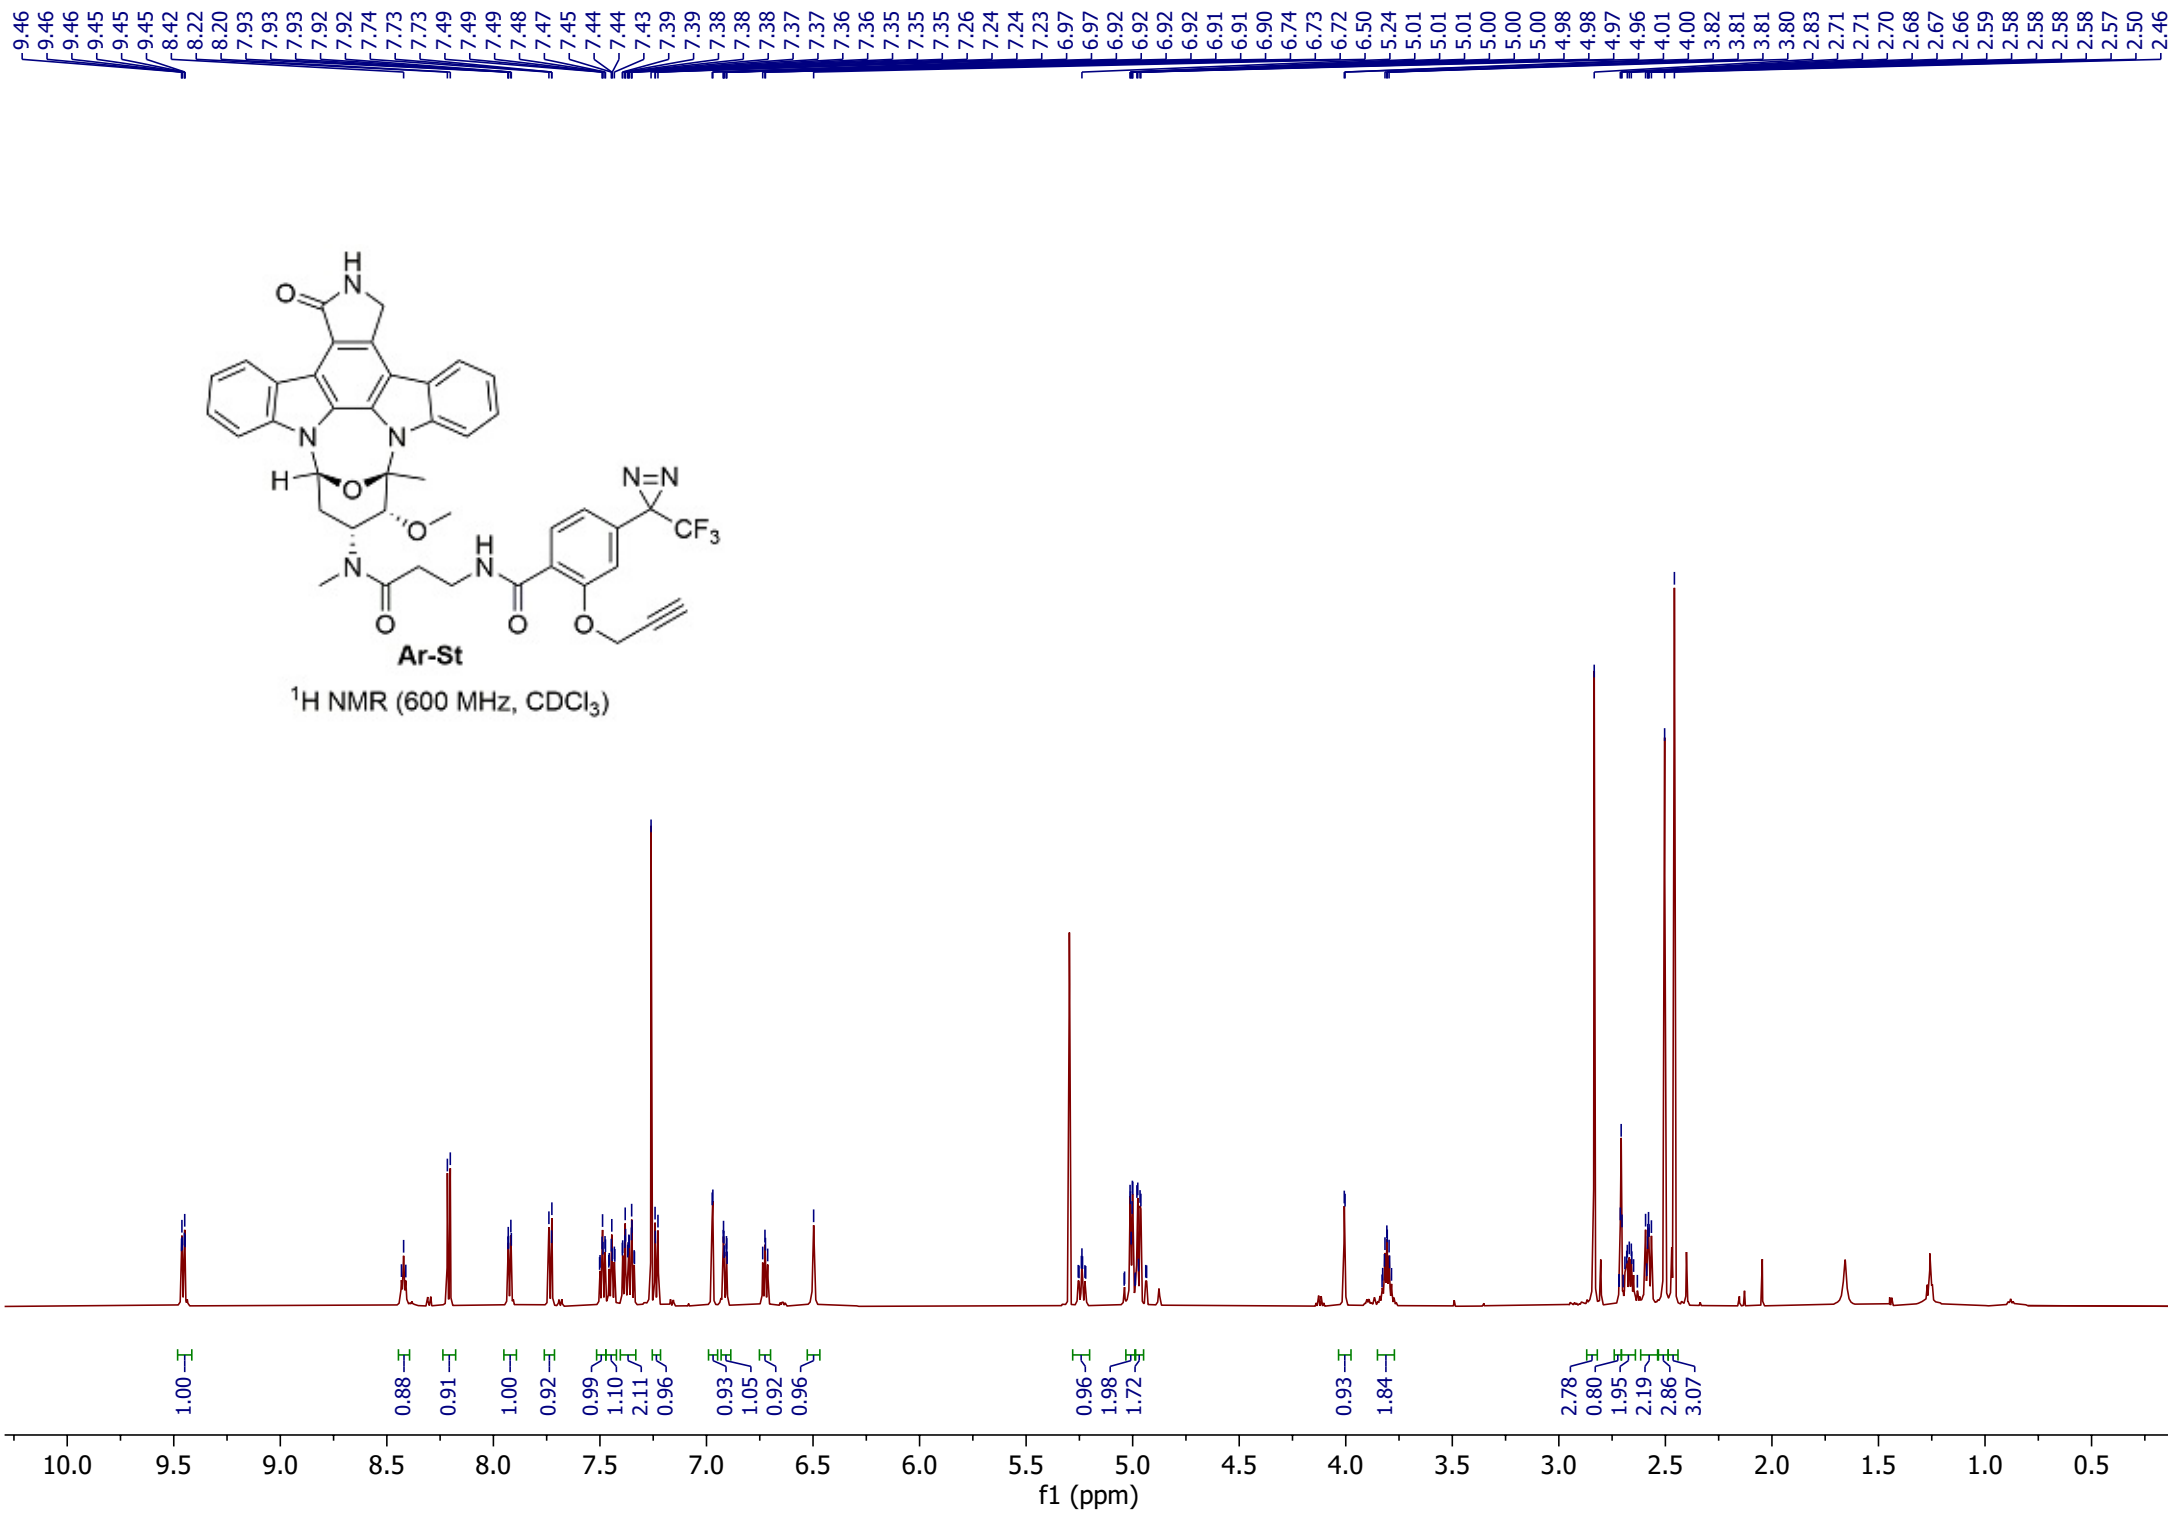

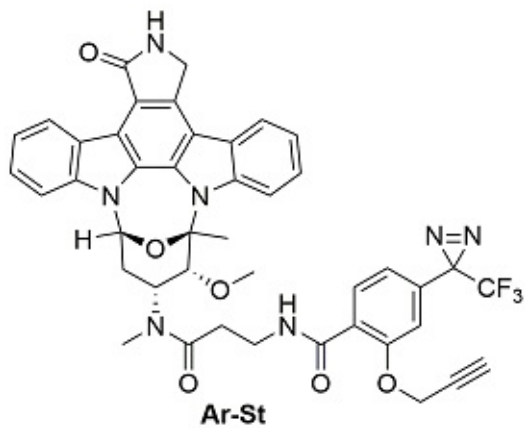

$^{13}\text{C}$  NMR (151 MHz,  $\text{CDCl}_3$ )

173.15  
172.53

163.89

155.37

138.61

136.58

133.51

132.92

132.42

130.51

126.86

126.30

125.53

124.96

124.75

123.83

123.65

122.79

121.53

120.96

120.58

120.20

120.00

119.20

116.41

114.58

112.36

111.42

107.61

94.61

84.87

82.53

77.66

77.24

77.09

76.82

60.48

57.02

48.53

45.87

35.45

33.89

31.21

29.71

29.15

29.13

28.51

28.25

28.09

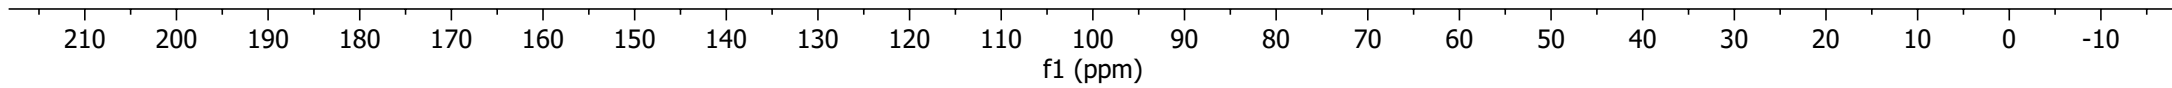

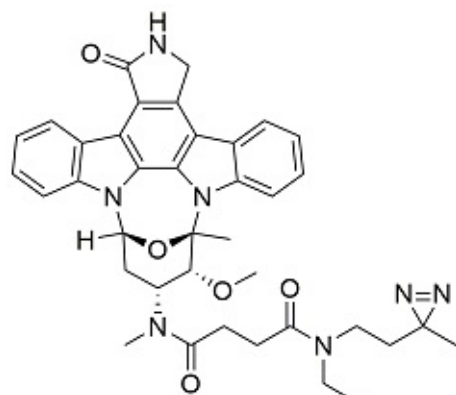

**BD-St**

$^1\text{H NMR}$  (400 MHz,  $\text{CDCl}_3$ )

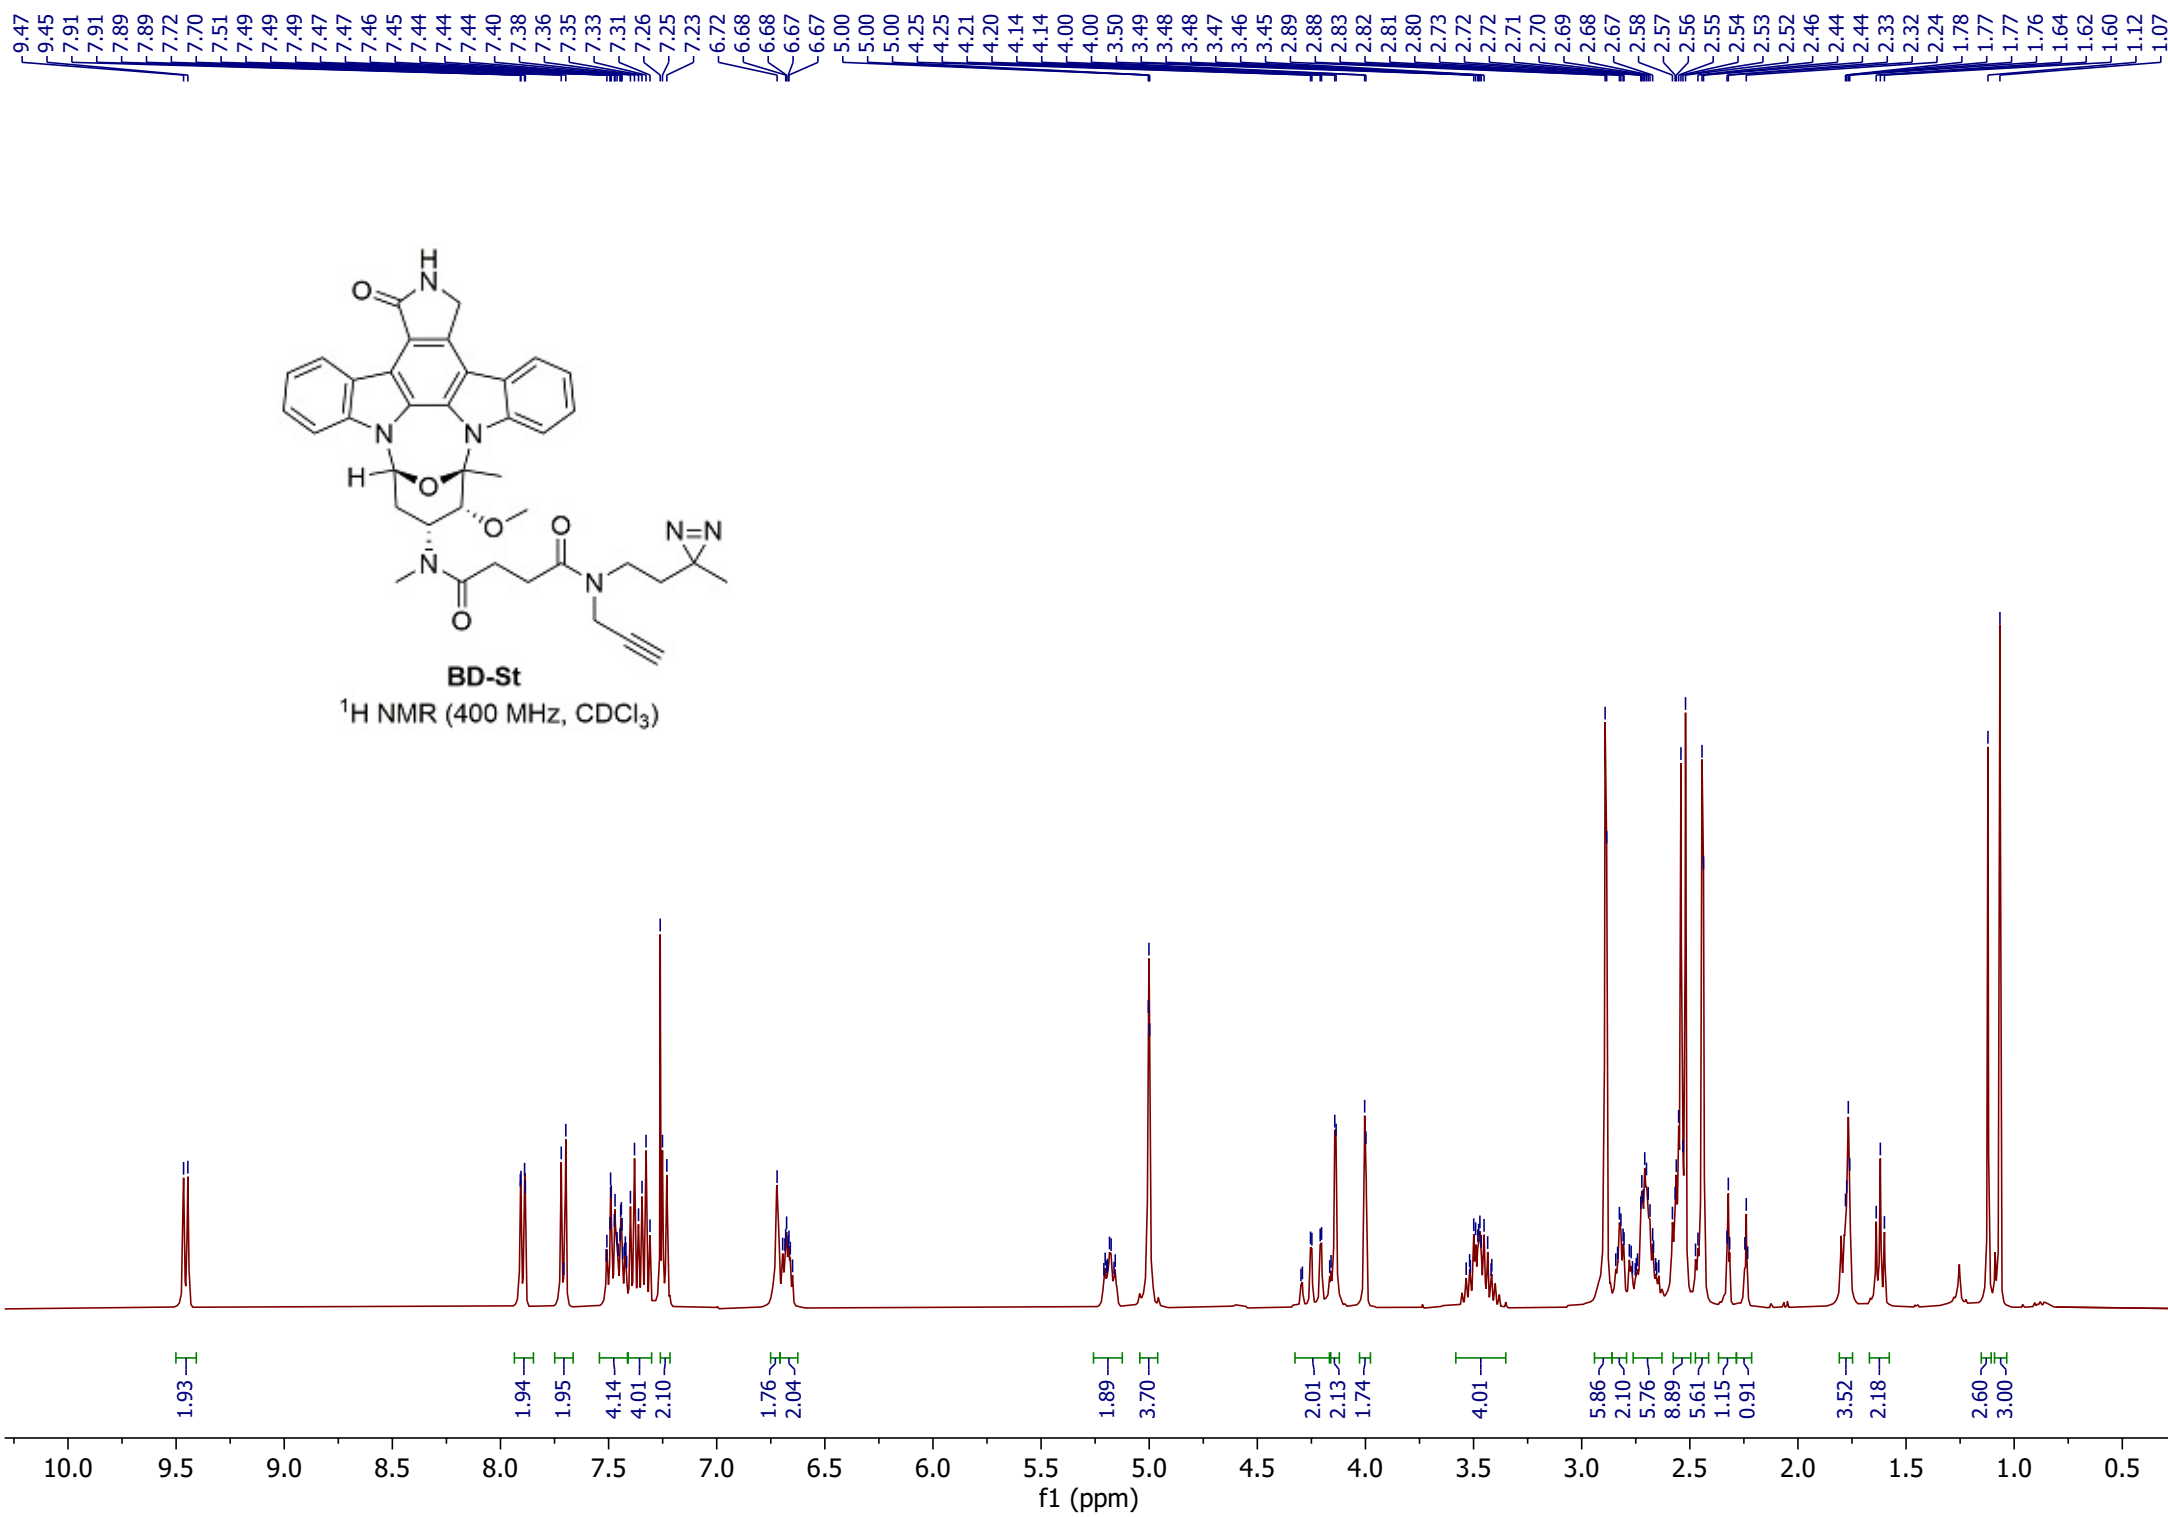

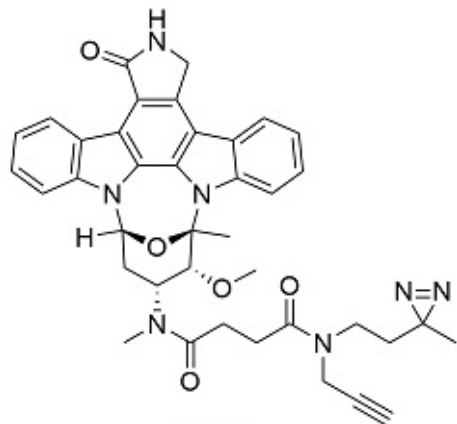

**BD-St**

<sup>13</sup>C NMR (101 MHz, CDCl<sub>3</sub>)

173.25  
172.81  
172.76  
171.78  
171.24

138.75  
138.71  
136.57  
132.47  
130.46  
126.79  
126.22  
126.18  
125.47  
124.91  
124.88  
124.70  
123.63  
121.44  
120.45  
120.10  
119.16  
116.37  
114.54  
112.52  
112.45  
107.67

94.67  
84.68  
82.52  
78.84  
78.39  
77.35  
77.24  
77.04  
76.80  
76.72  
73.01  
72.20  
60.58  
60.53  
48.74  
48.69  
45.91  
42.16  
42.10  
37.76  
34.56  
33.55  
32.78  
31.21  
29.28  
29.23  
28.95  
28.82  
28.35  
28.03  
24.35  
23.98  
19.87  
19.63

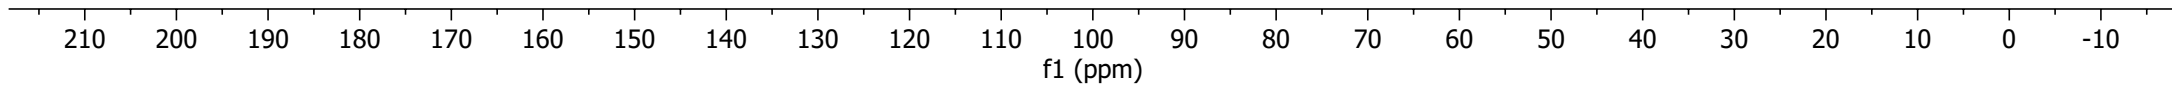

9.46  
9.44  
7.93  
7.91  
7.75  
7.73  
7.51  
7.49  
7.47  
7.45  
7.45  
7.45  
7.43  
7.43  
7.40  
7.38  
7.36  
7.34  
7.33  
7.26  
7.26  
7.25  
7.23  
6.73  
6.71  
6.70  
6.59

5.71  
5.70  
5.68  
5.22  
5.22  
5.20  
5.17  
5.01  
5.01

4.29  
4.29  
4.00  
4.00

3.54  
3.52  
3.51  
3.01  
3.00  
2.99  
2.81  
2.59  
2.58  
2.56  
2.55  
2.53  
2.49  
2.47

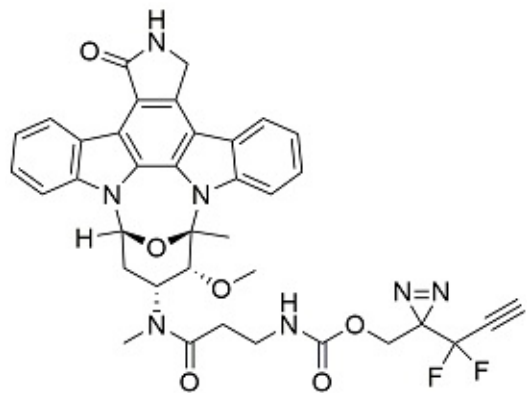

DF-St

<sup>1</sup>H NMR (400 MHz, CDCl<sub>3</sub>)

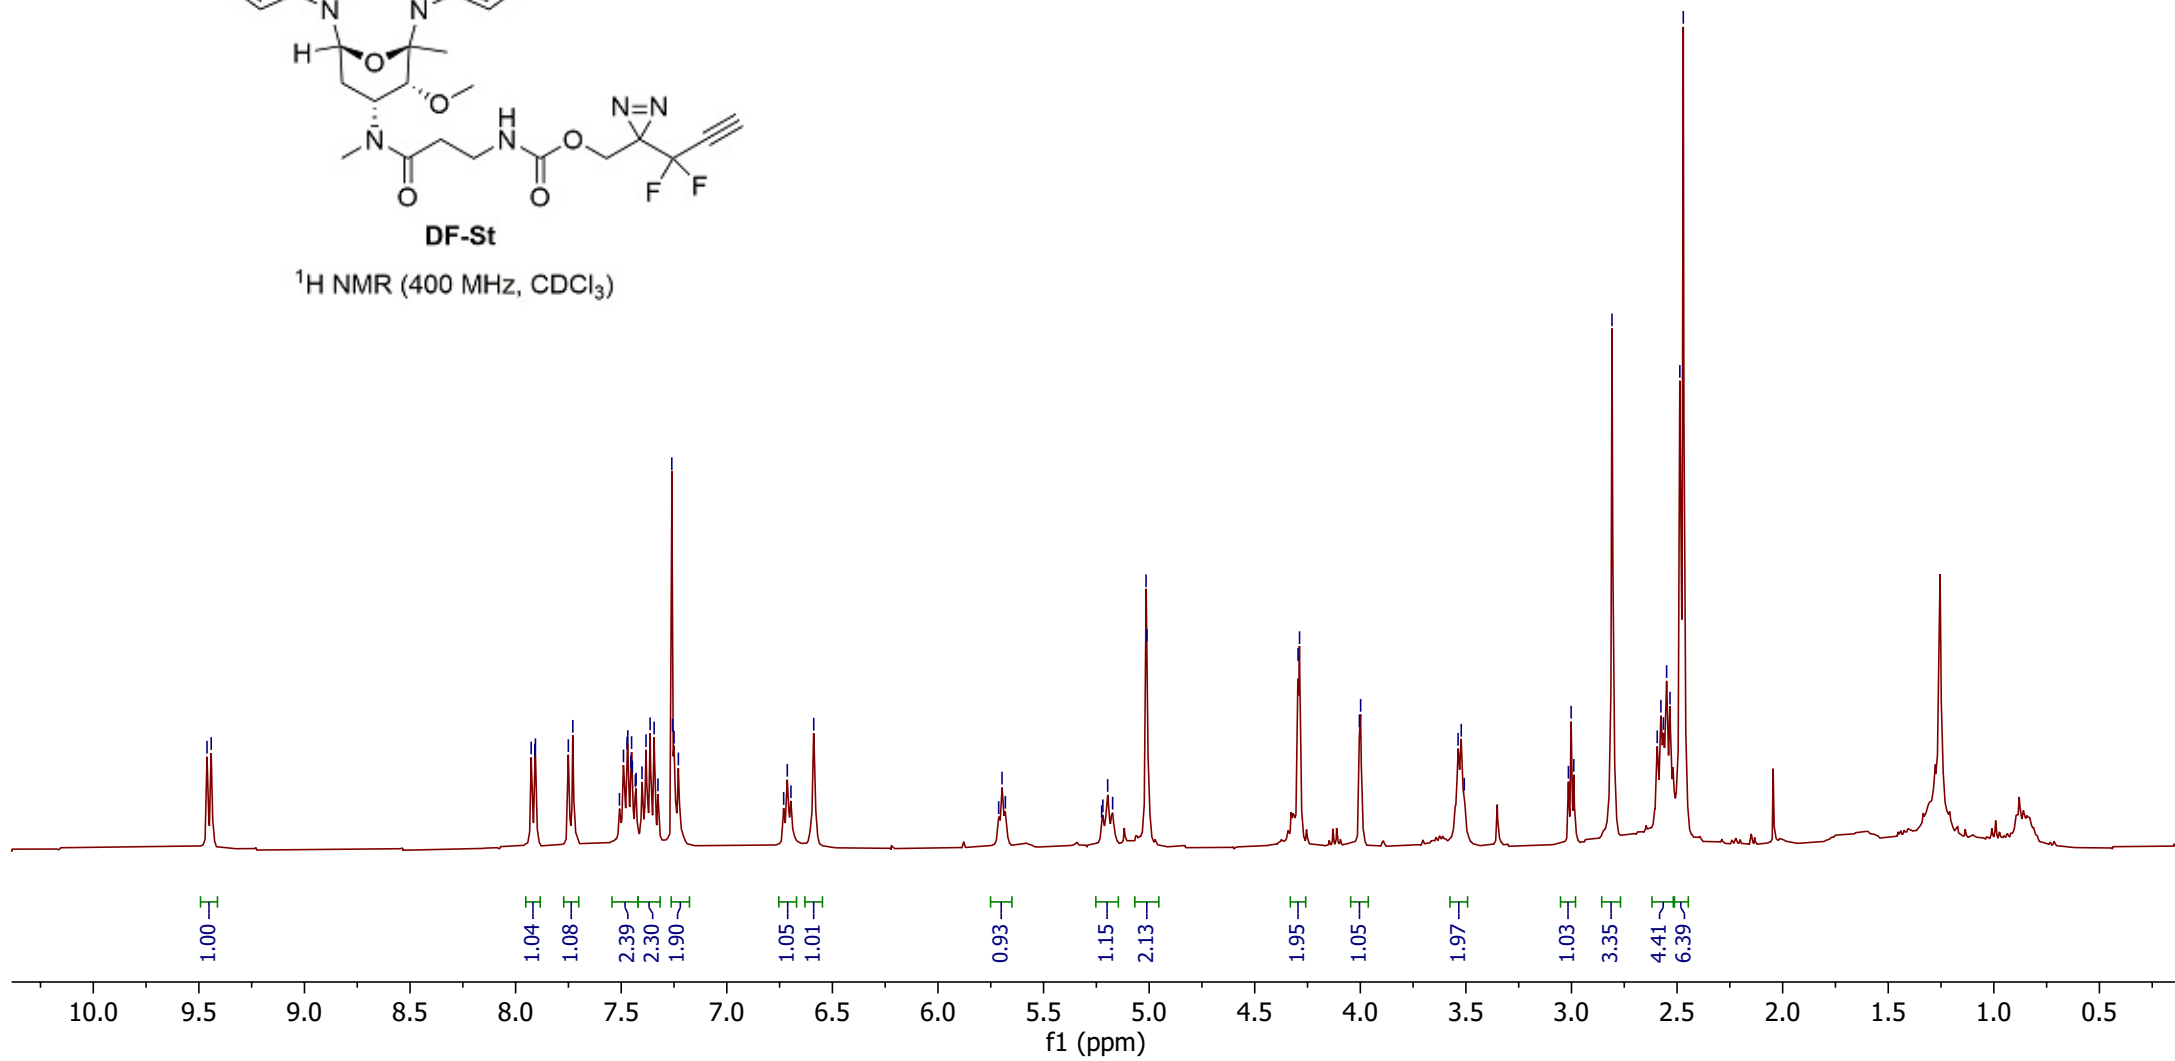



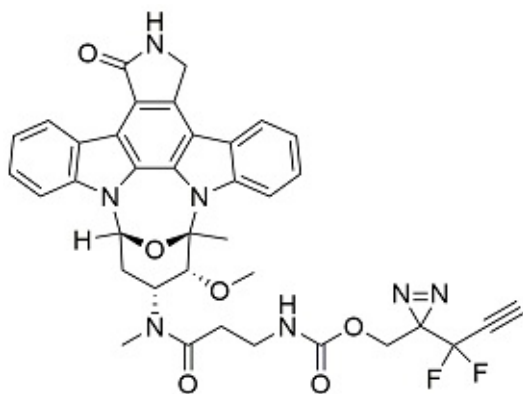

DF-St

<sup>13</sup>C NMR (151 MHz, CDCl<sub>3</sub>)

173.26  
173.23  
172.26  
155.17  
155.14  
138.65  
138.63  
136.59  
136.57  
132.46  
132.44  
130.52  
130.50  
126.85  
126.31  
126.28  
125.55  
125.52  
125.05  
124.73  
124.70  
123.66  
123.64  
123.64  
121.50  
120.59  
120.56  
120.20  
120.20  
119.17  
116.39  
114.60  
114.57  
112.40  
110.20  
107.67  
107.65  
94.61  
94.58  
84.84  
84.82  
82.49  
82.46  
80.58  
80.53  
72.73  
60.52  
60.49  
60.00  
59.97  
48.61  
48.58  
45.93  
45.91  
36.83  
34.01  
31.19  
31.16  
29.88  
29.73  
29.65  
29.20  
29.18  
28.06  
28.03

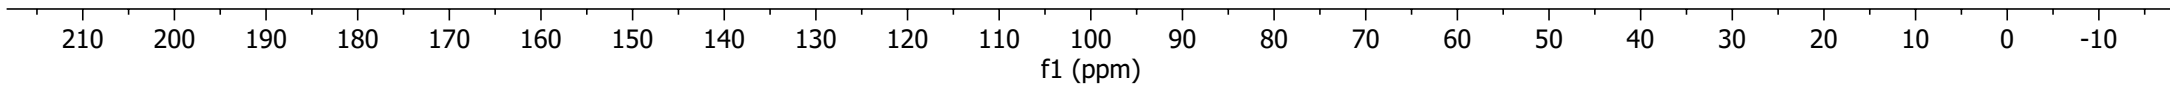

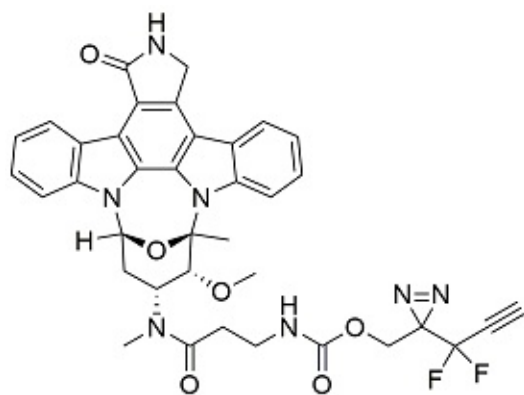

**DF-St**

$^{19}\text{F}$  NMR (376 MHz,  $\text{CDCl}_3$ )

-86.52  
-86.54

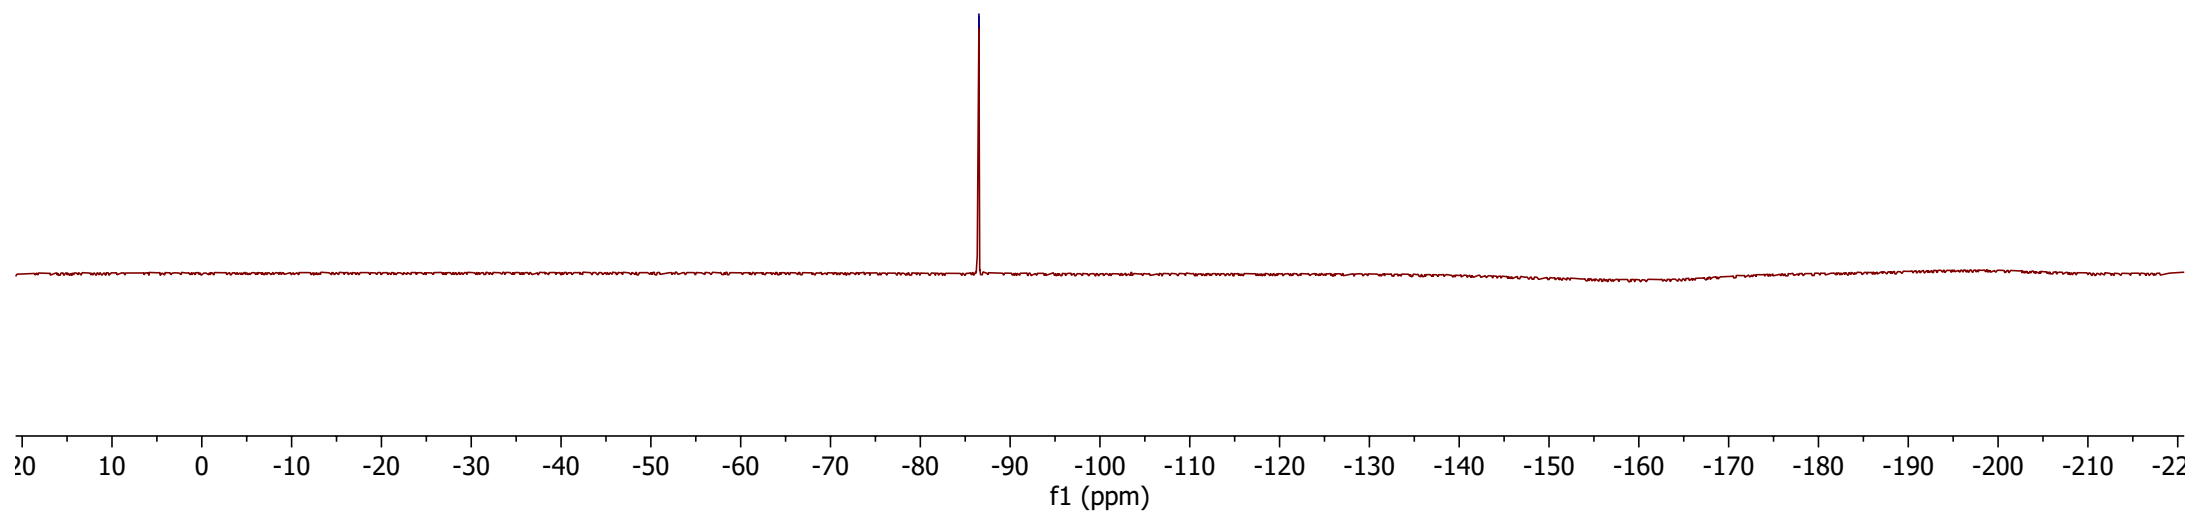

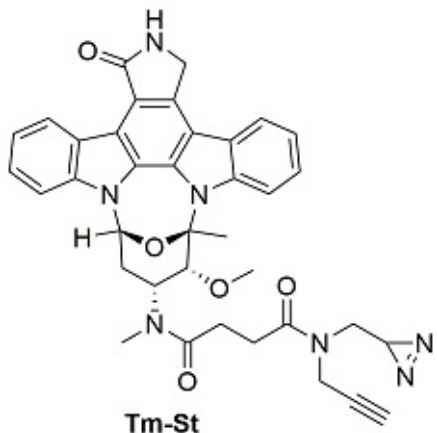

$^1\text{H NMR}$  (400 MHz,  $\text{CDCl}_3$ )

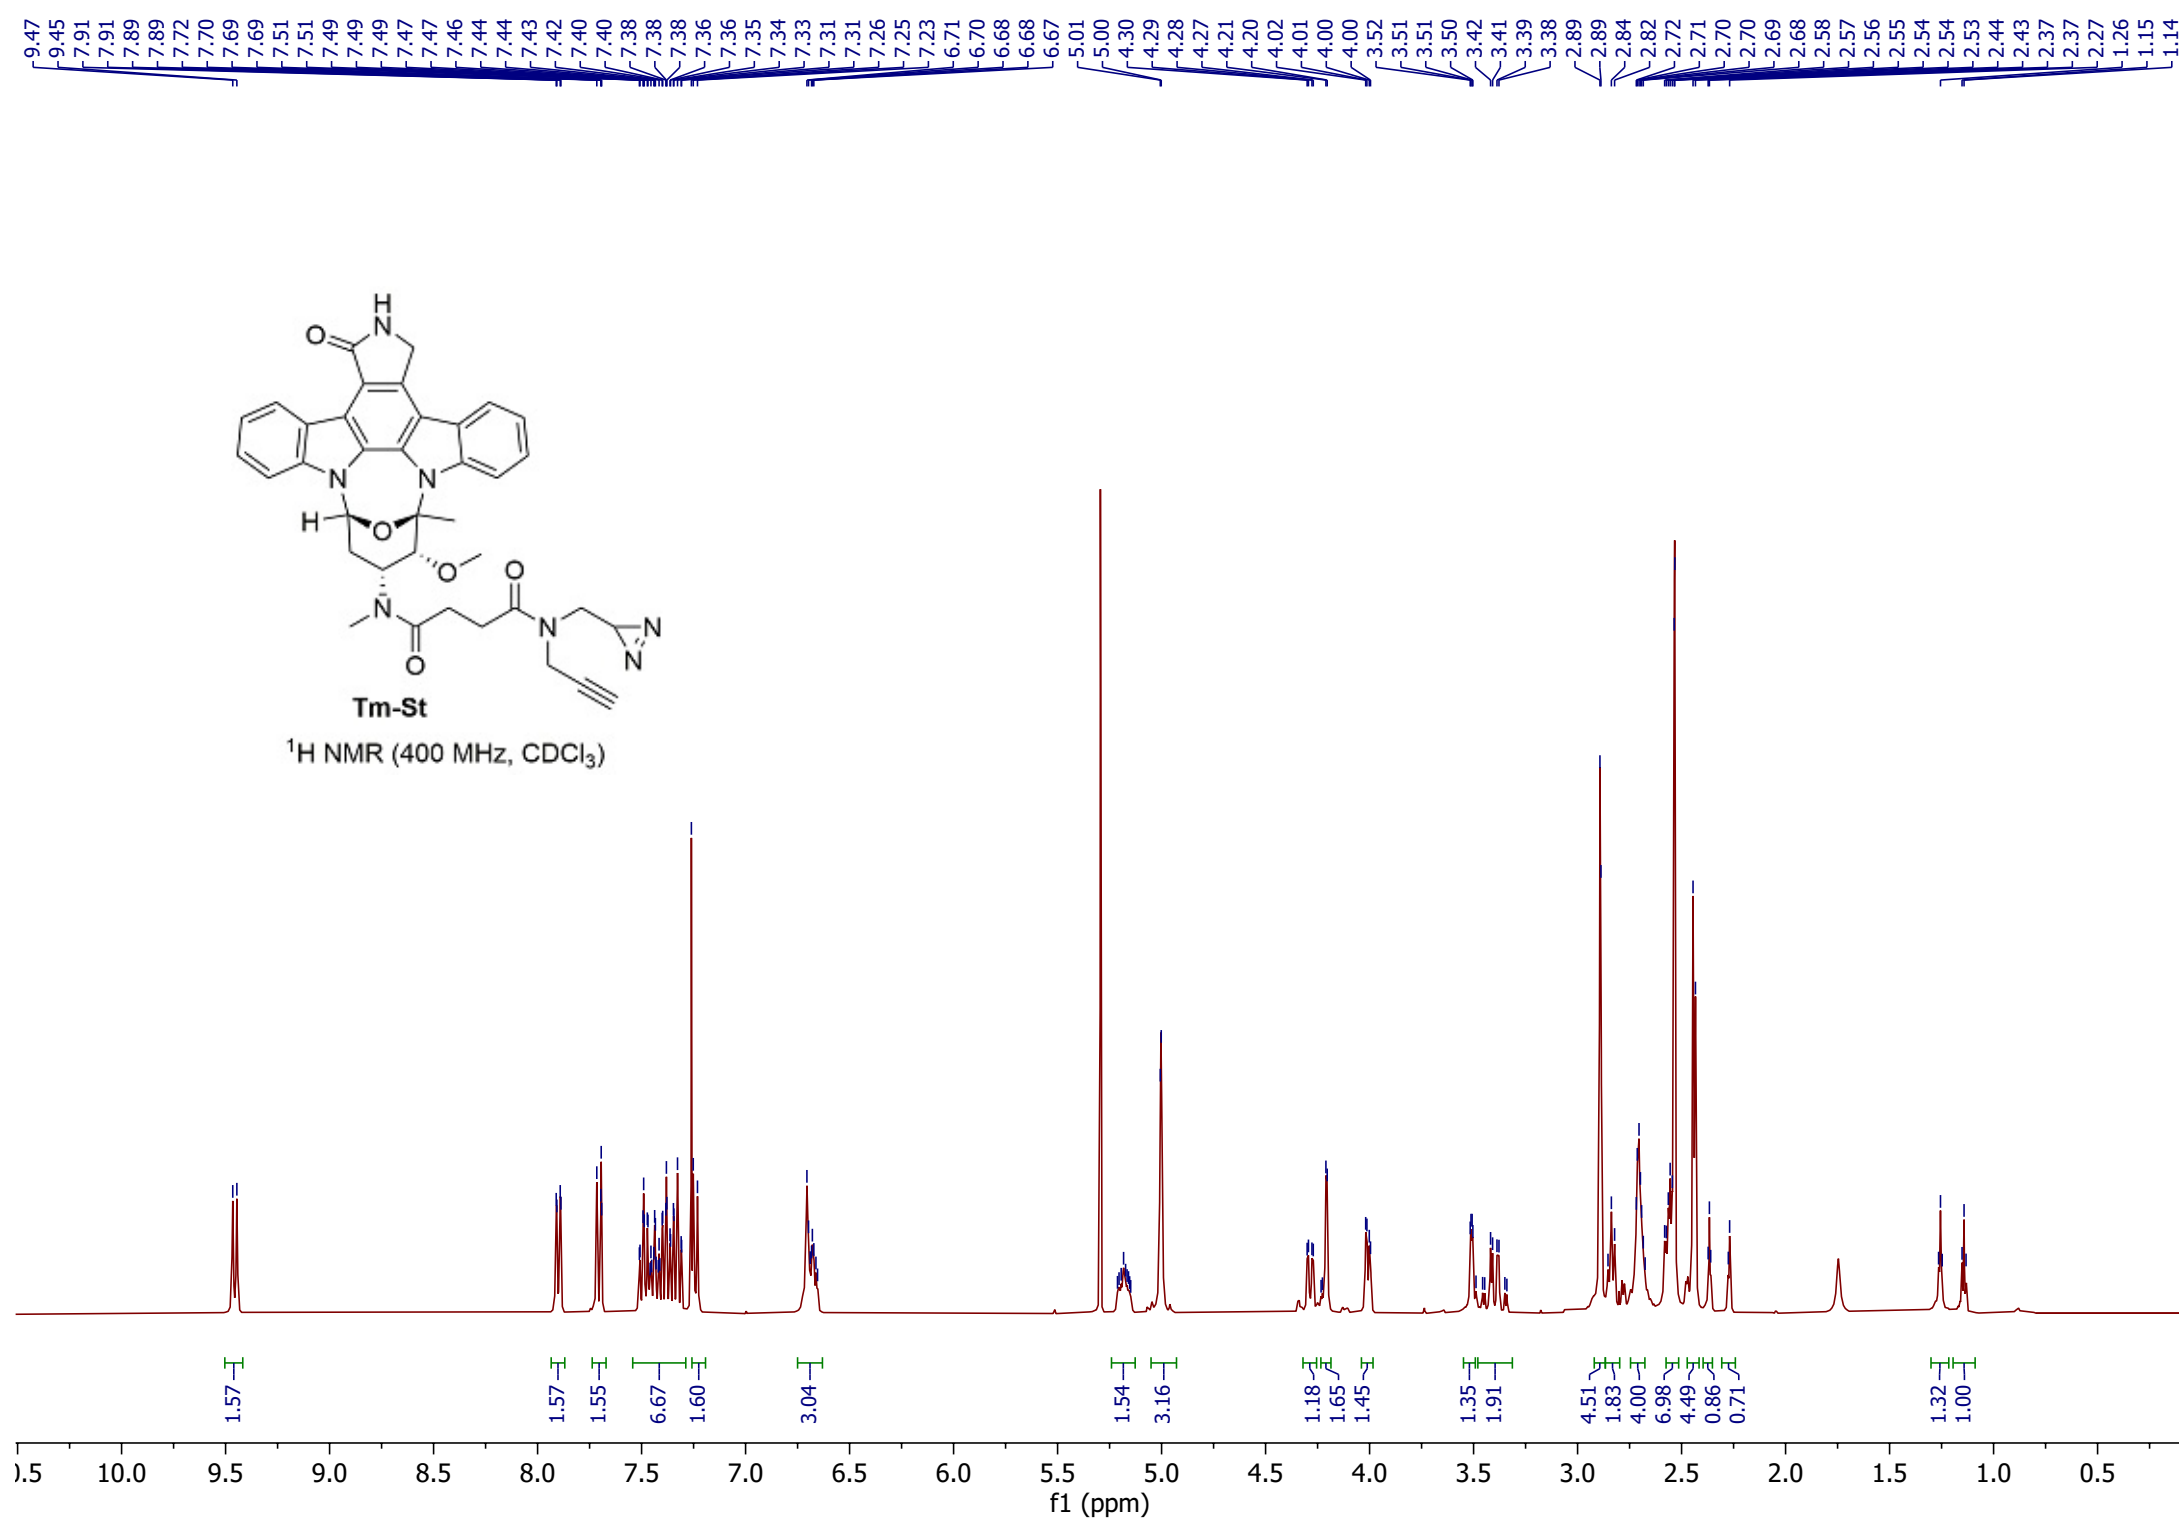

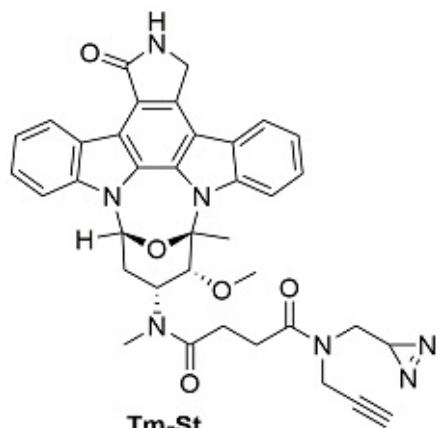

<sup>13</sup>C NMR (101 MHz, CDCl<sub>3</sub>)

173.27  
172.70  
172.66  
172.15  
171.62

138.74  
136.57  
132.49  
130.47  
126.81  
126.22  
125.49  
124.91  
124.70  
123.64  
121.45  
120.47  
120.12  
119.17  
116.37  
114.55  
112.49  
107.69  
— 94.68

84.66  
82.53  
77.37  
77.05  
76.73  
73.40  
72.66

60.58  
53.45  
48.77  
46.35  
46.06  
45.93  
38.31  
35.38  
31.24  
29.28  
29.24  
28.94  
28.88  
28.31  
28.10  
28.03  
19.66

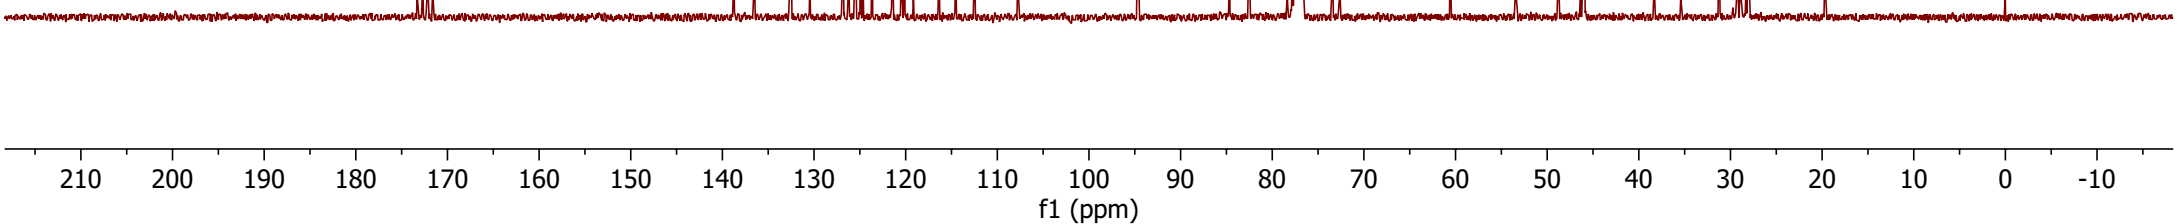

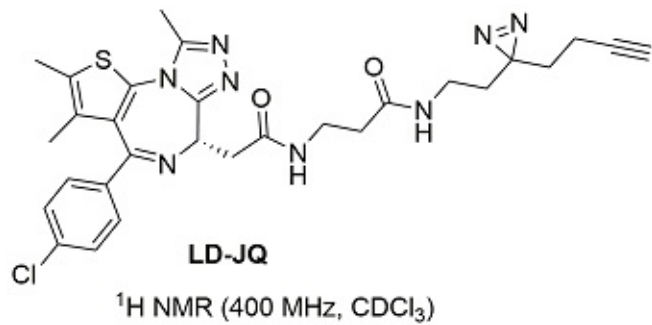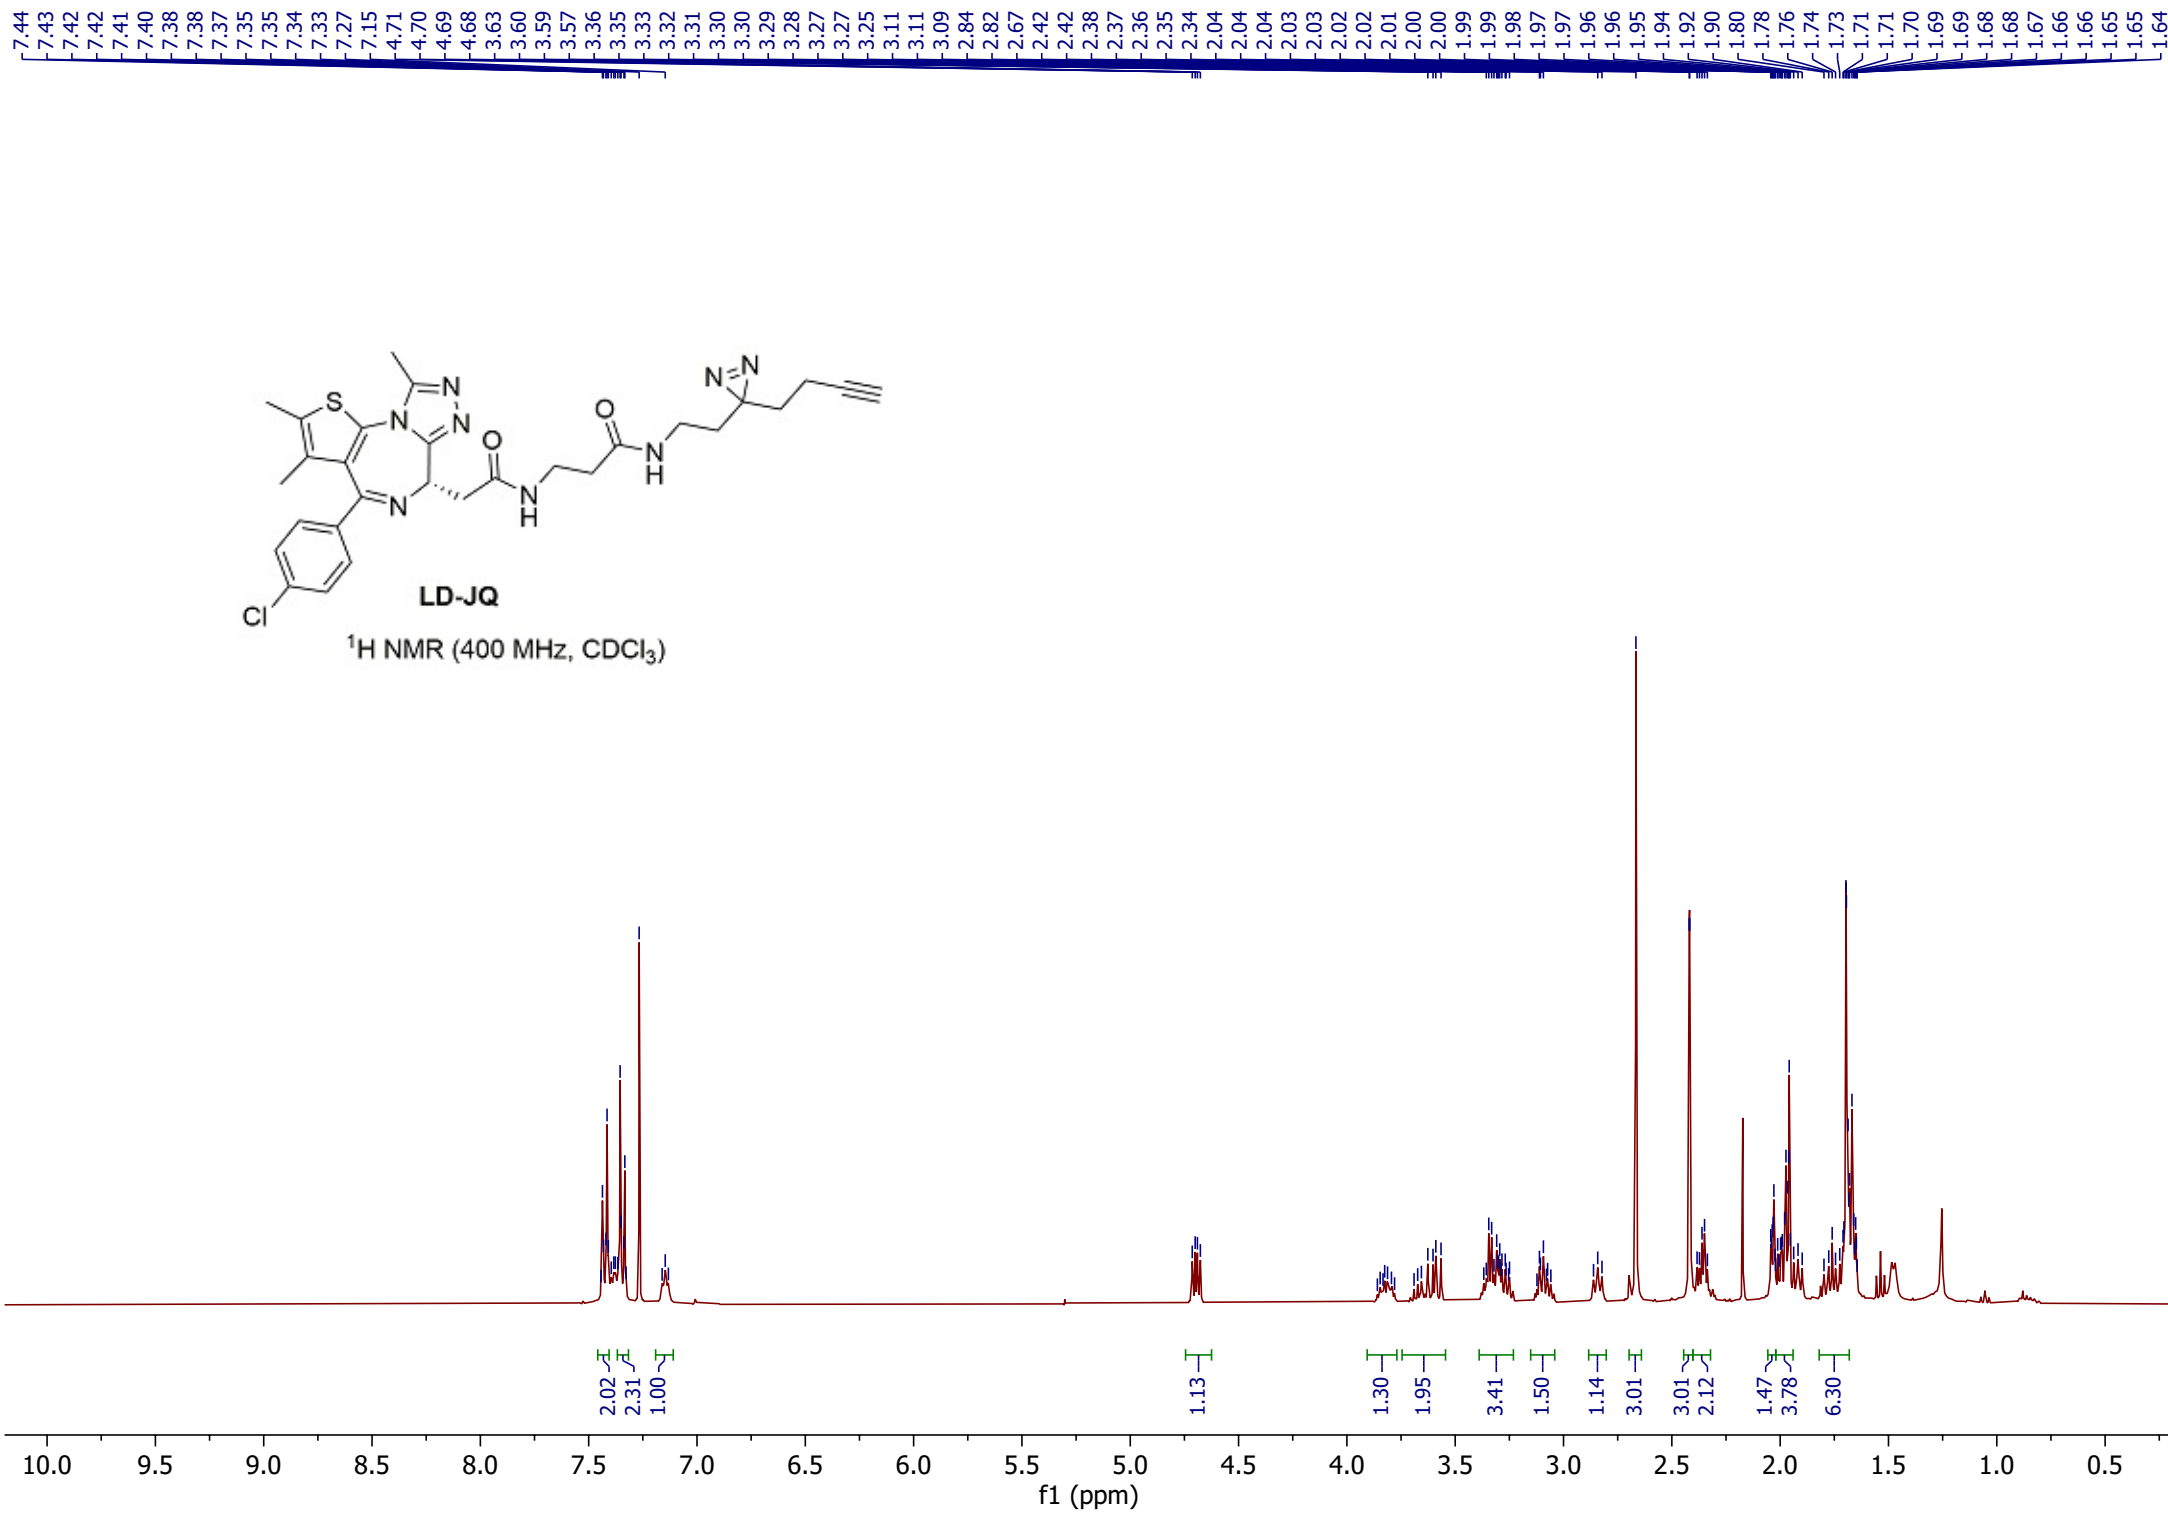

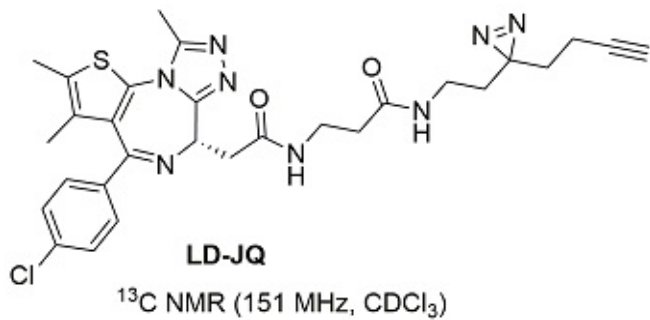

171.94  
 170.65  
 164.22  
 155.72  
 149.93  
 136.95  
 136.45  
 132.03  
 131.08  
 130.90  
 130.50  
 129.88  
 128.78

82.75  
 77.25  
 77.03  
 76.82  
 69.69  
 69.32

54.46

39.14  
 37.04  
 36.40  
 35.19  
 34.63  
 32.01  
 31.69  
 27.51

14.40  
 13.25  
 13.13  
 11.83

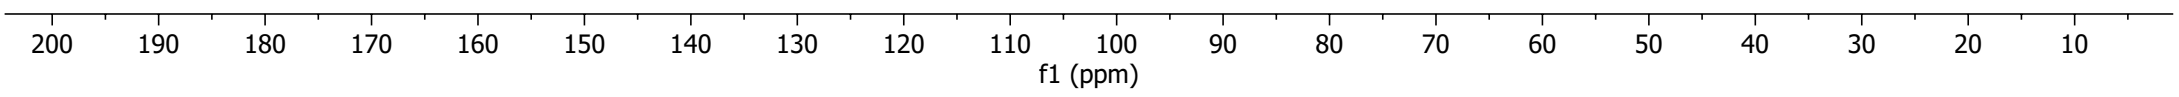

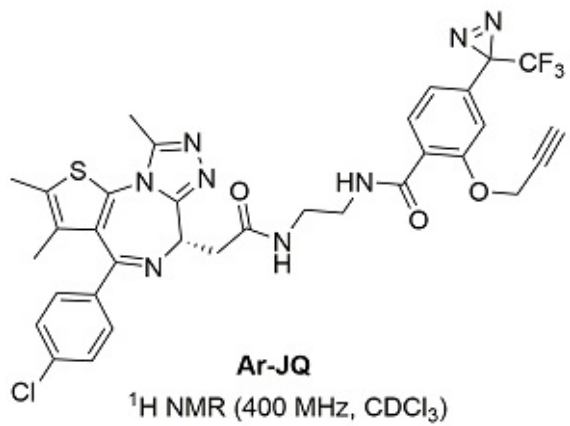

8.16  
8.15  
8.06  
8.05  
7.37  
7.36  
7.30  
7.28  
7.27  
7.26  
7.04  
7.03  
7.02  
6.88  
6.87

4.90  
4.90  
4.62  
4.61  
4.61  
4.60

3.68  
3.67  
3.67  
3.66  
3.66  
3.65  
3.64  
3.64  
3.57  
3.57  
3.56  
3.56  
3.55  
3.55  
3.54  
3.53  
3.53  
3.39  
3.39  
3.38  
3.37  
3.36  
2.62  
2.40  
1.63

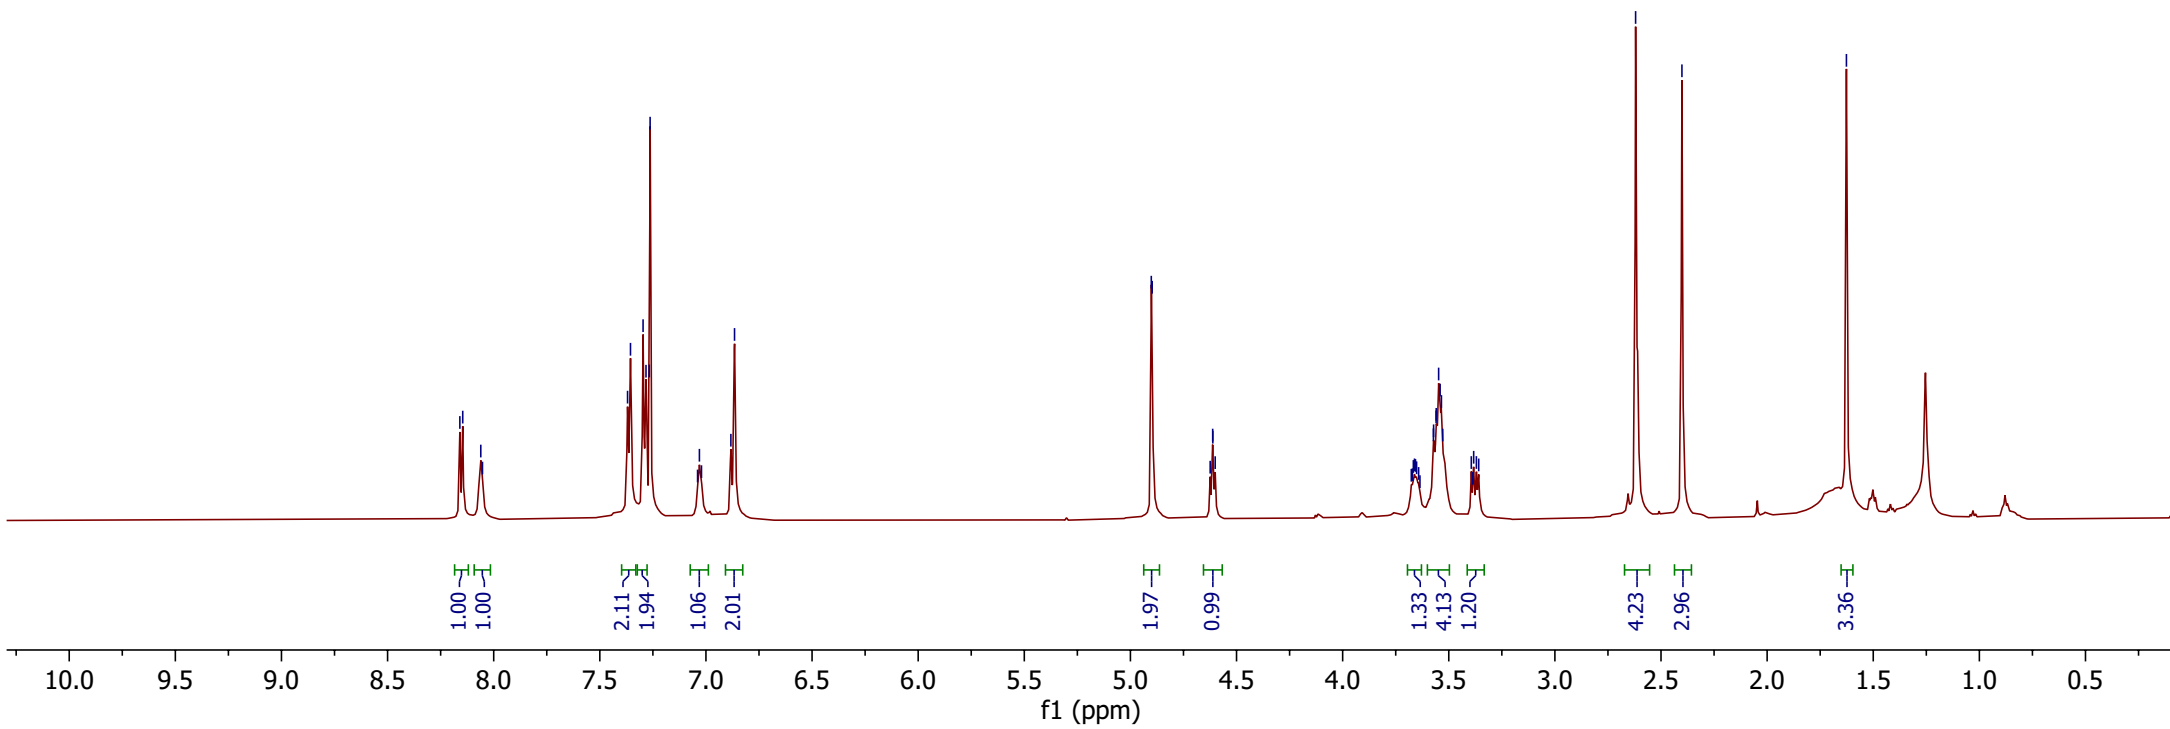

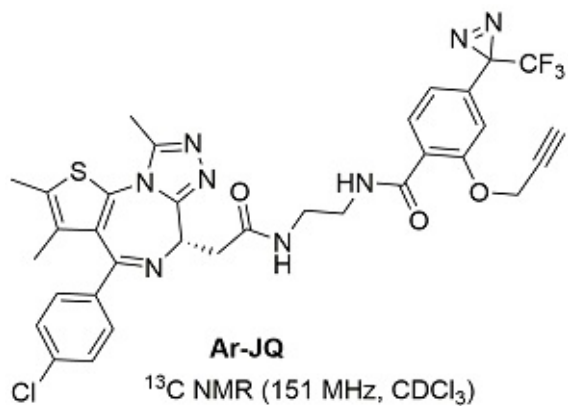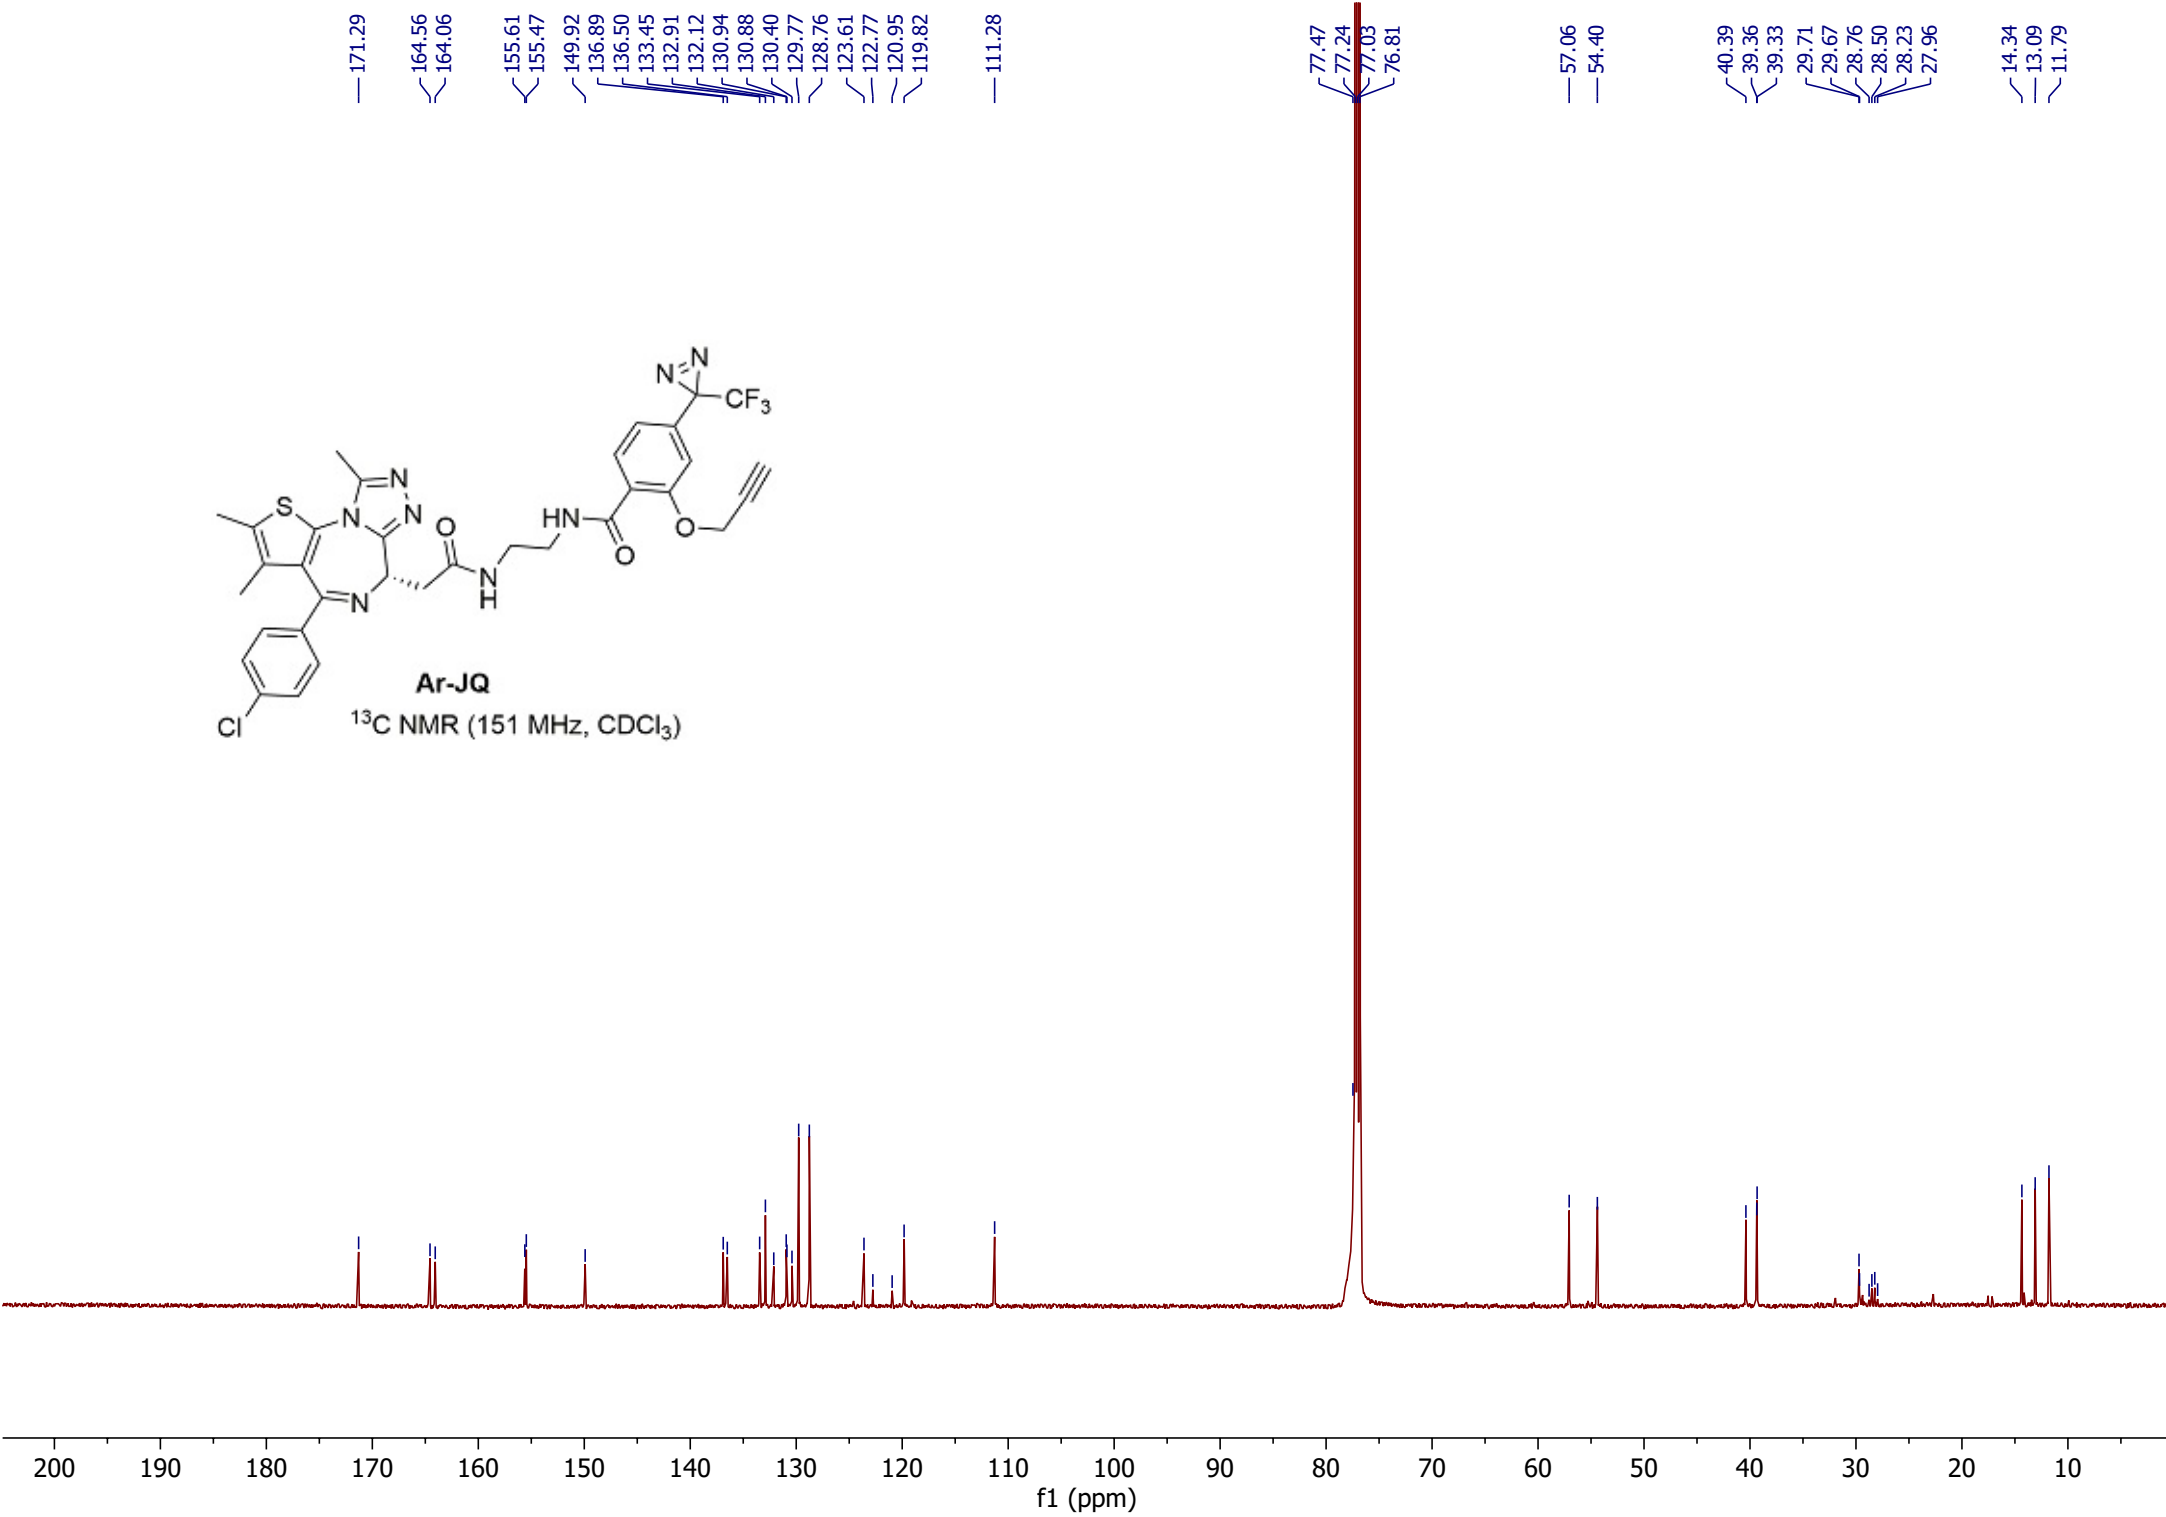



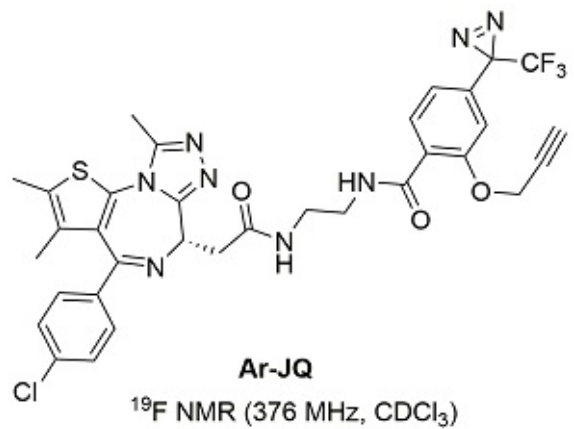

—64.86

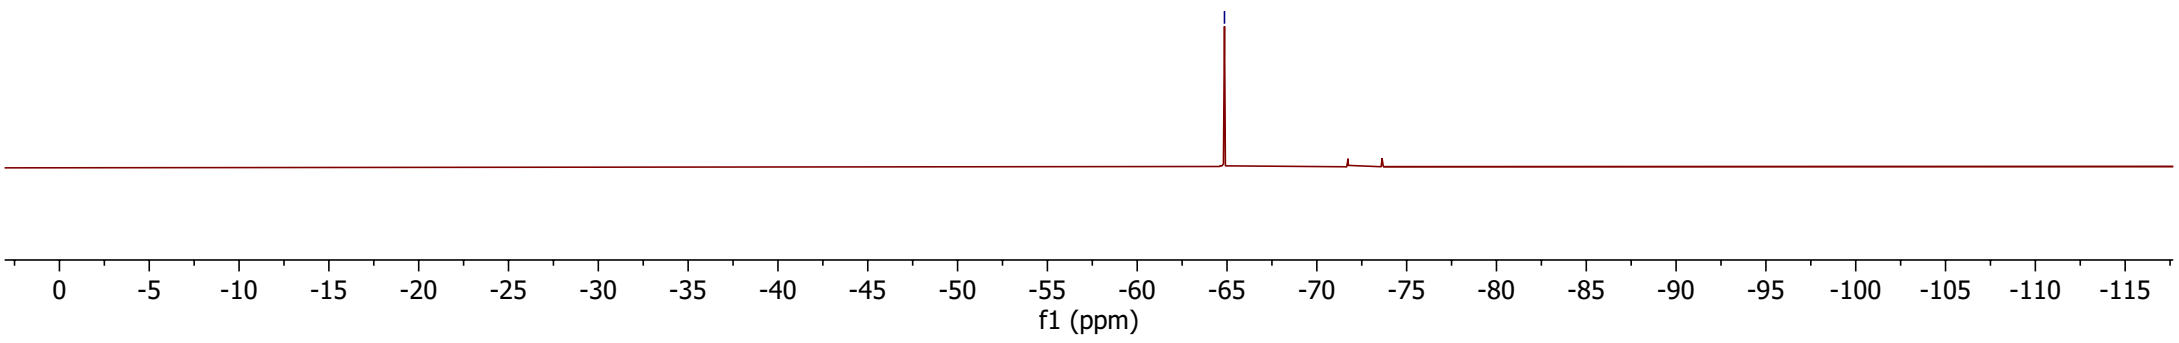

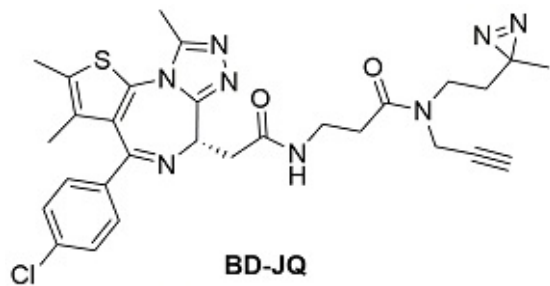

<sup>1</sup>H NMR (600 MHz, CDCl<sub>3</sub>)

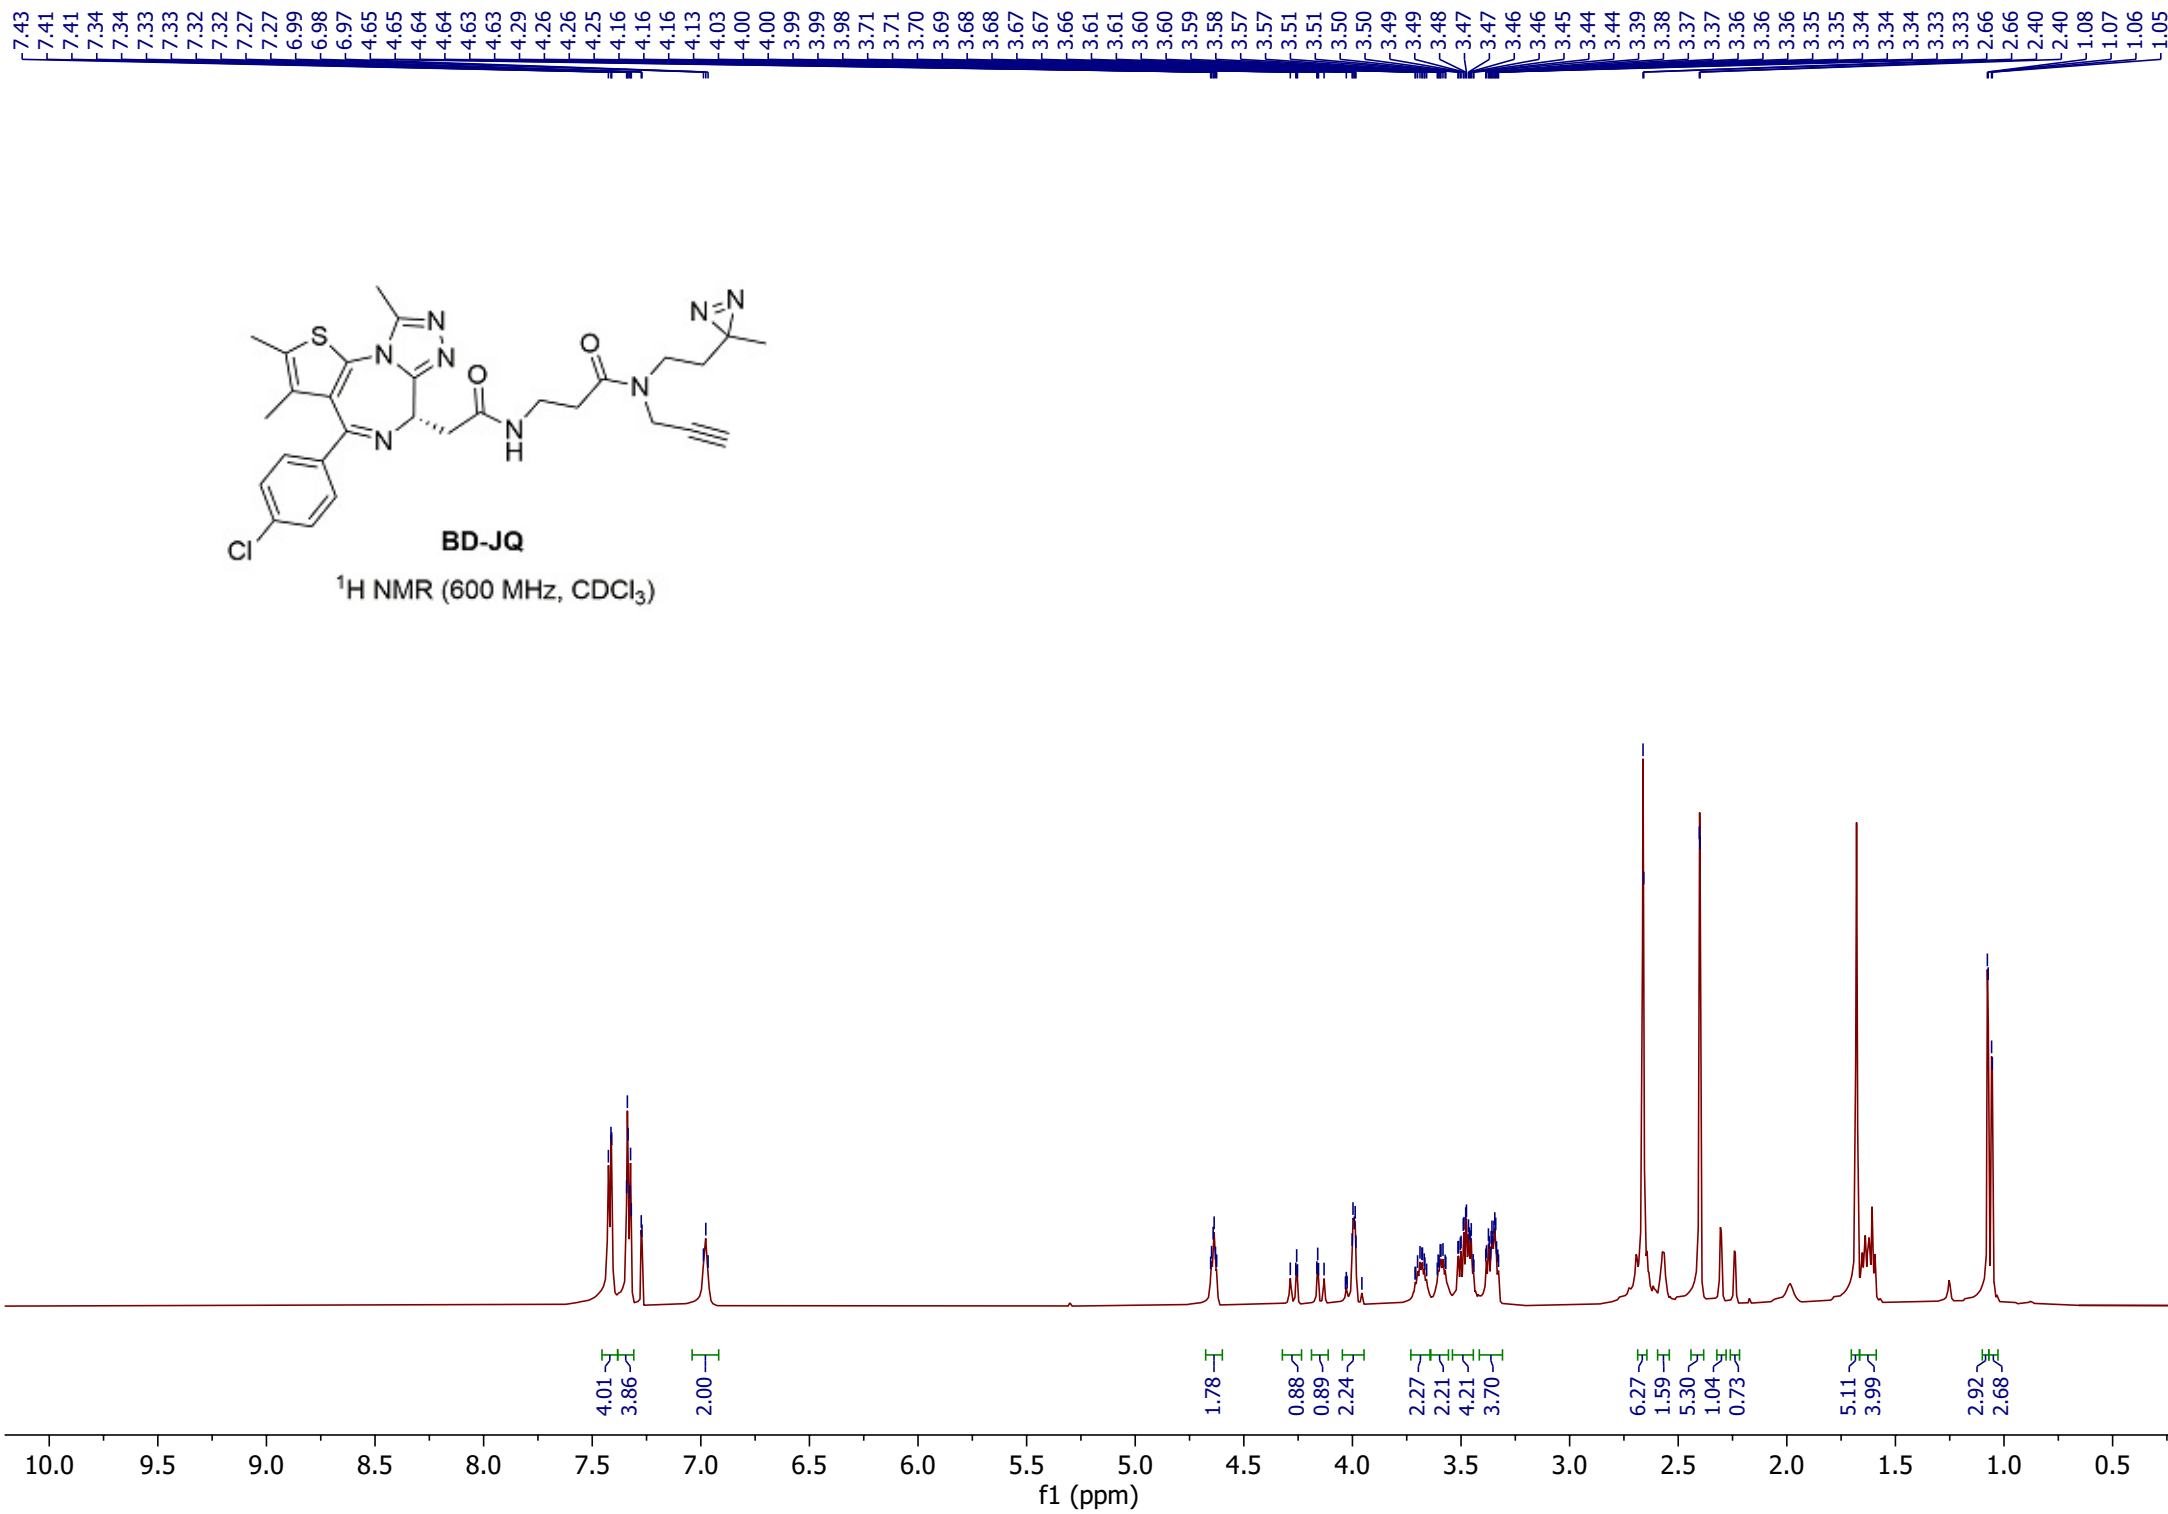

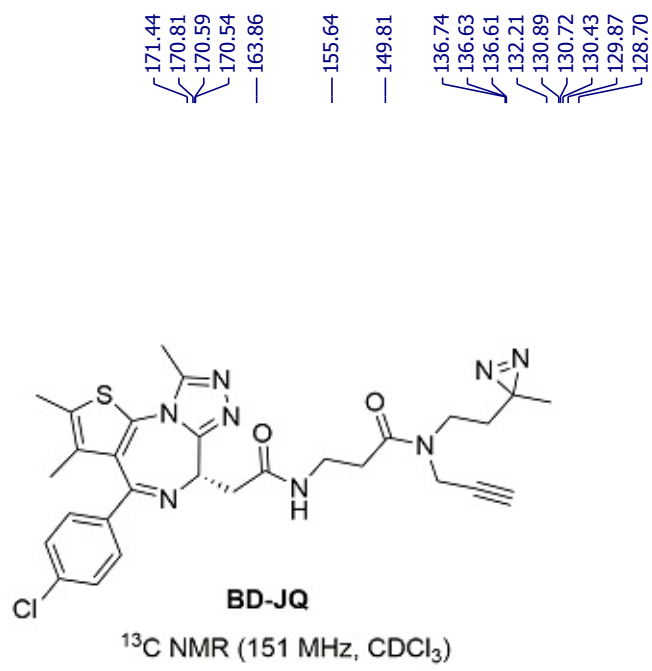

171.44  
170.81  
170.59  
170.54  
163.86  
155.64  
149.81  
136.74  
136.63  
136.61  
132.21  
130.89  
130.72  
130.43  
129.87  
128.70

78.62  
78.13  
77.26  
77.05  
76.84  
73.16  
72.36

54.27  
54.23  
41.99  
41.78  
39.10  
37.64  
35.22  
34.18  
33.42  
33.21  
32.87  
32.70  
24.38  
23.86  
19.78  
19.59  
14.42  
13.10  
11.85

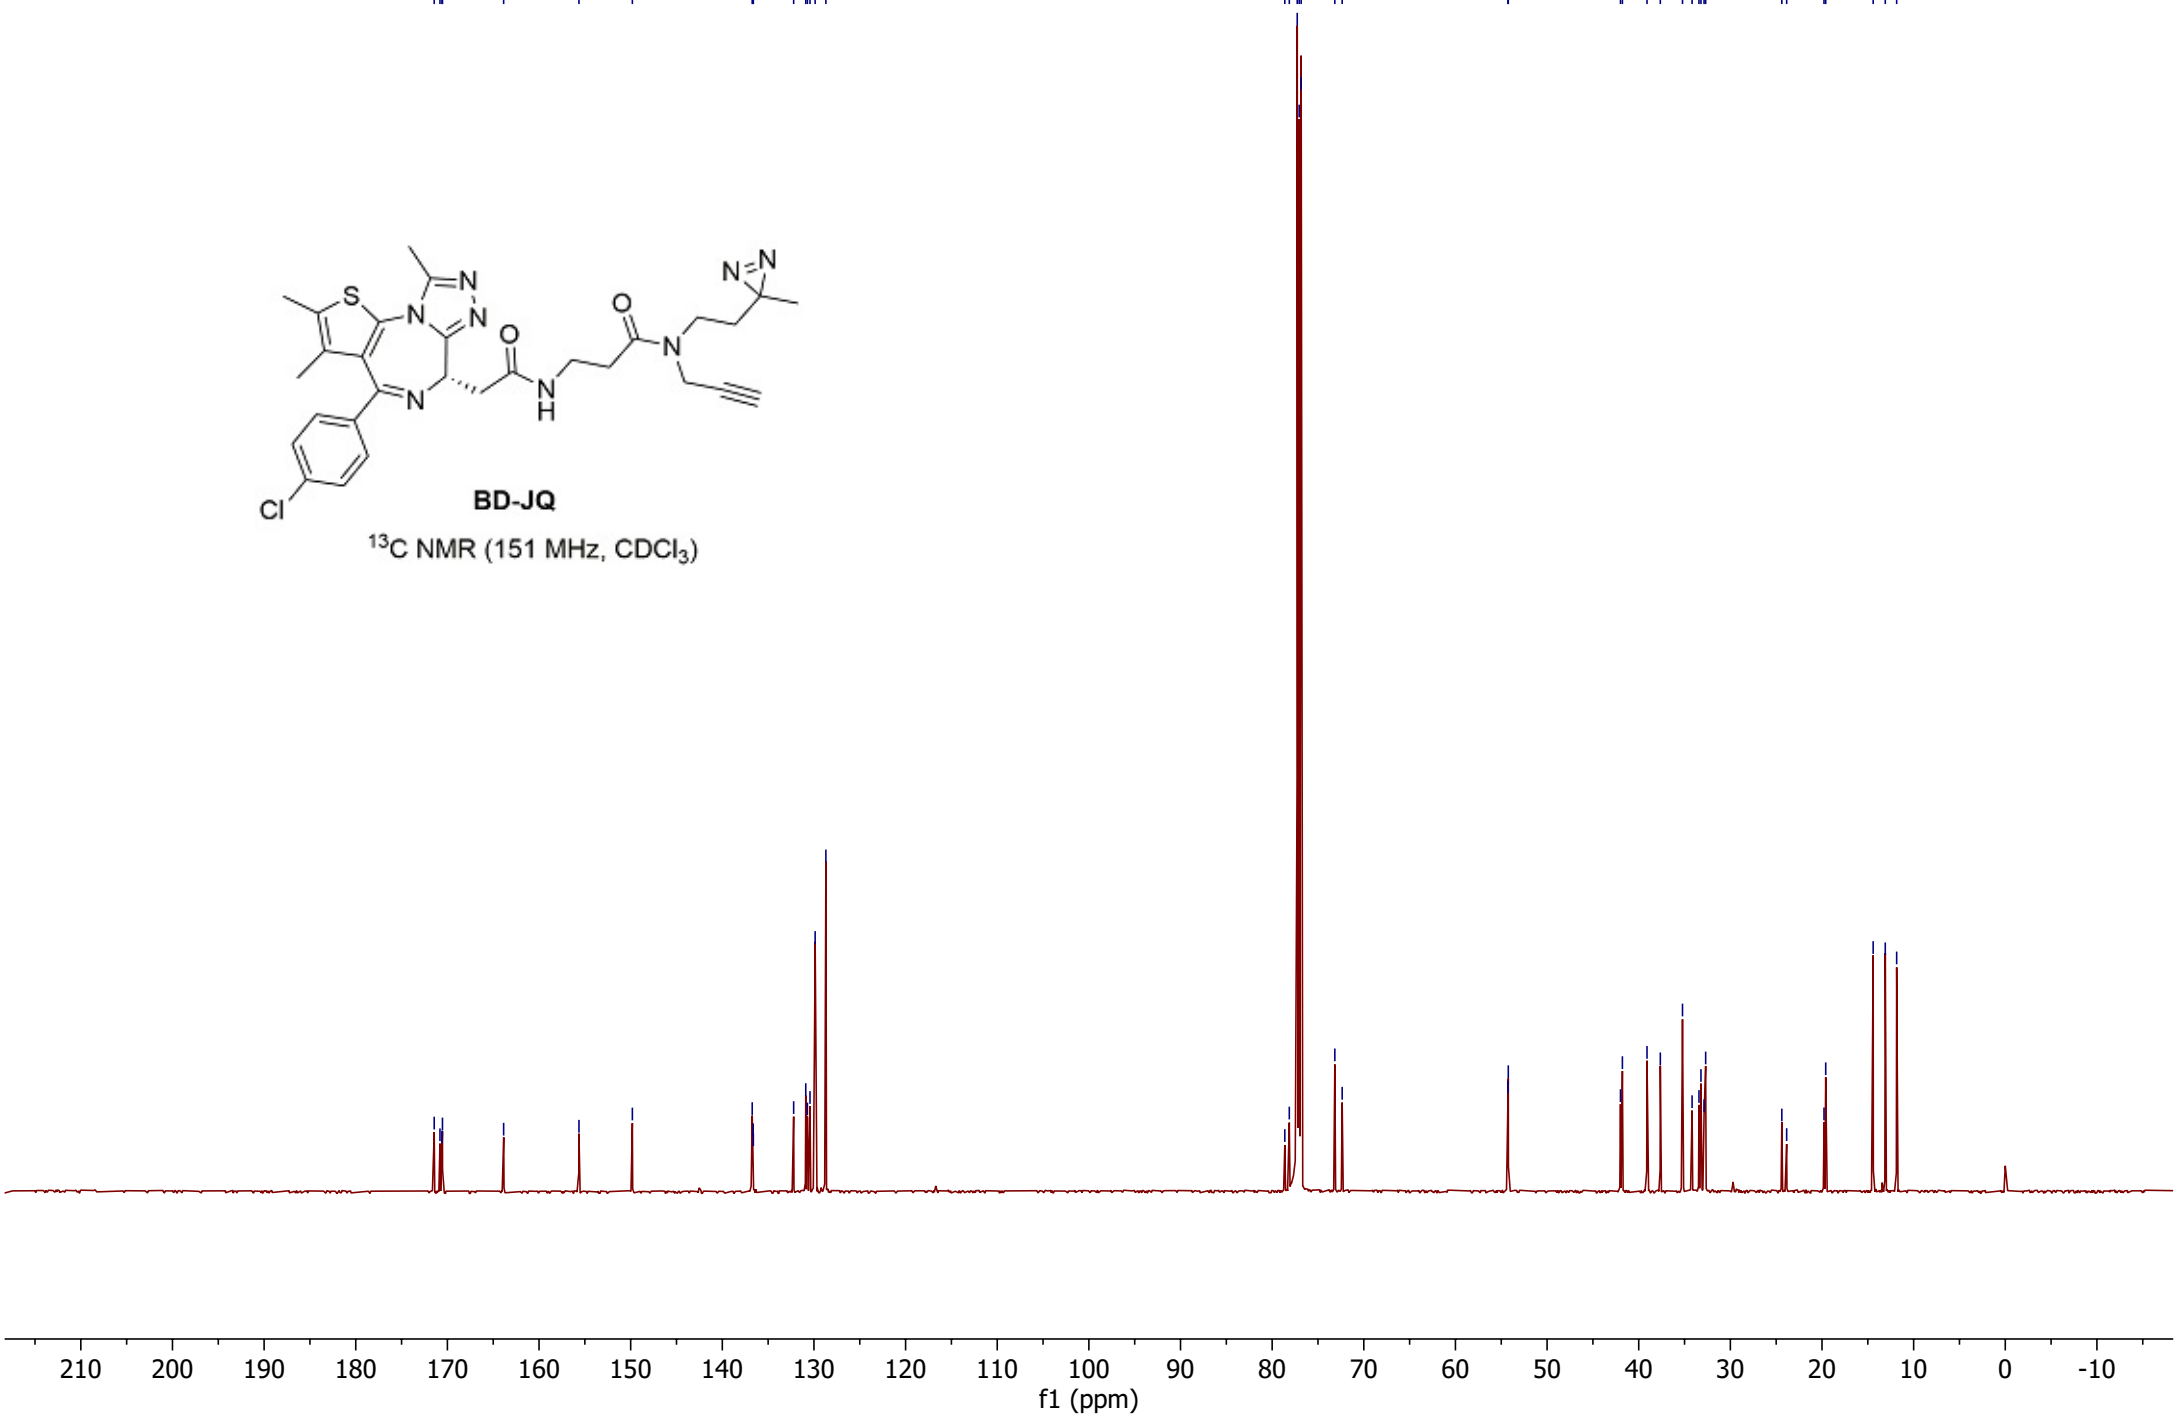

8.21  
8.19  
8.18  
7.39  
7.38  
7.37  
7.37  
7.36  
7.32  
7.32  
7.31  
7.31  
7.29  
7.27  
6.86  
6.84  
6.83

4.76  
4.75  
4.75  
4.73

4.23  
3.64  
3.62  
3.62  
3.61  
3.59  
3.58  
3.58  
3.49  
3.47  
3.45  
3.43  
3.40  
3.39  
3.38  
3.38  
3.37  
3.36  
3.35  
3.34  
3.33  
3.32  
3.31  
3.30  
3.29  
3.29  
3.07  
3.06  
3.05  
2.74  
2.42  
2.42  
1.69  
1.68

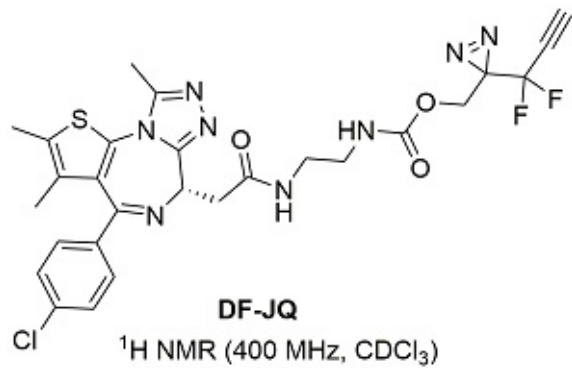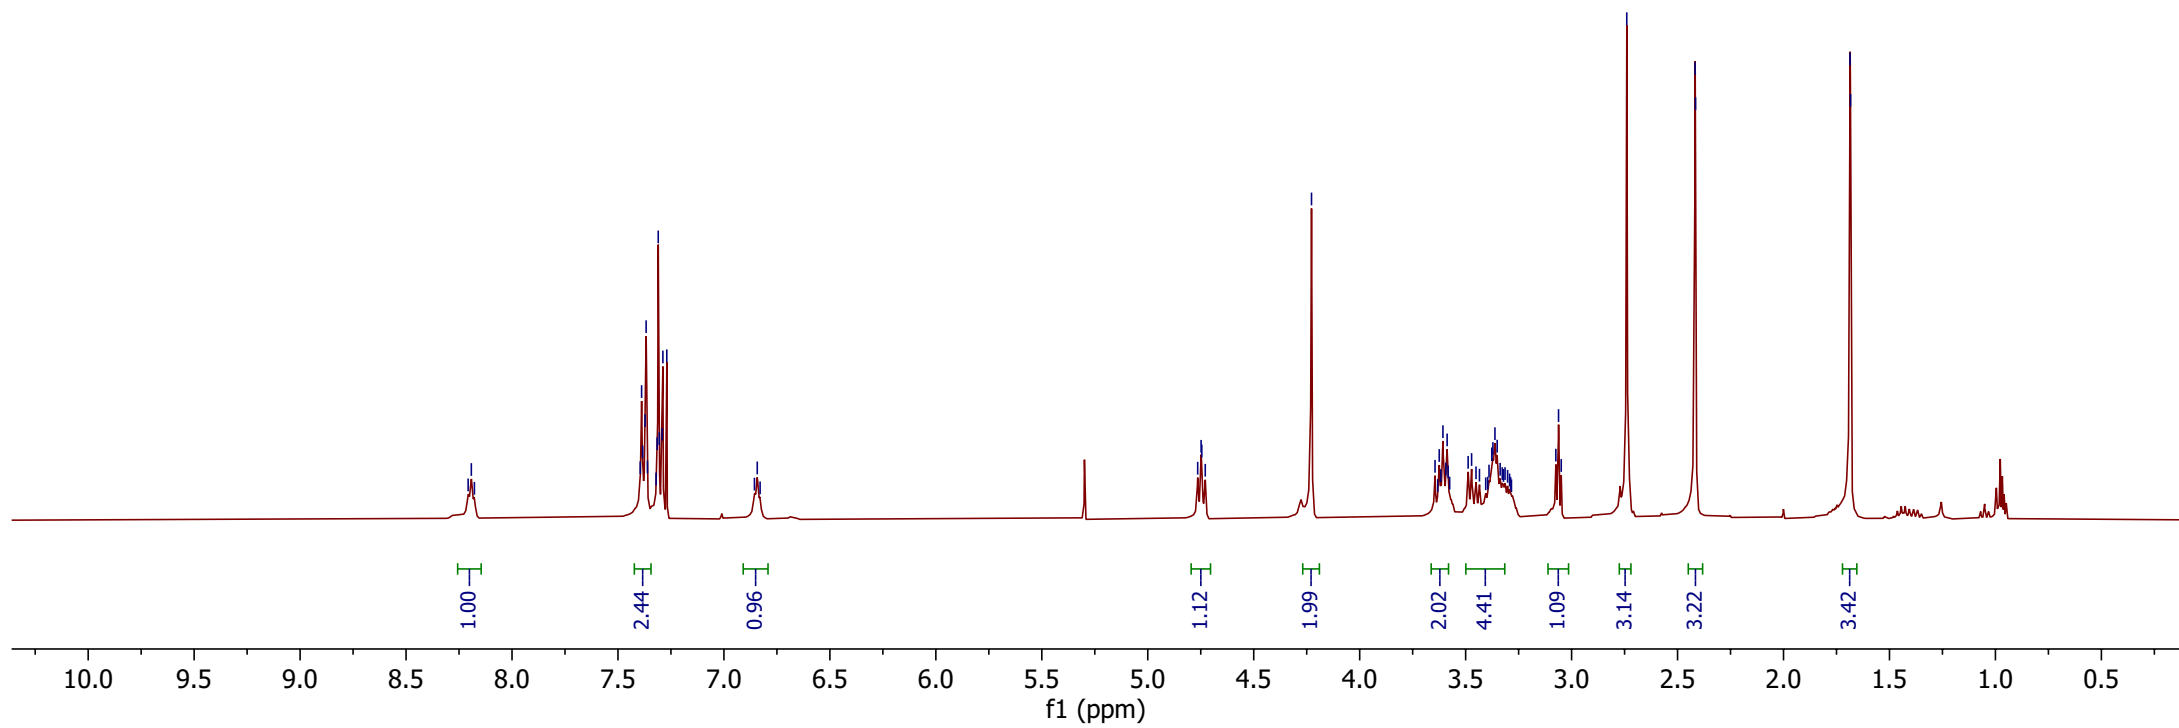

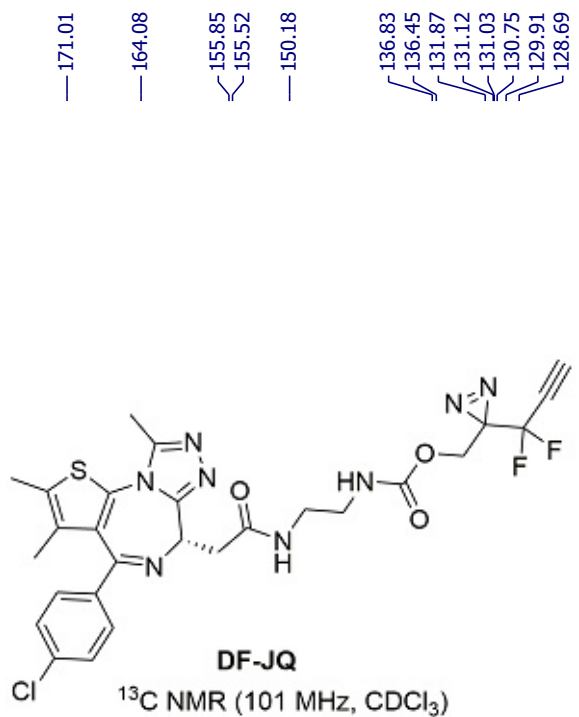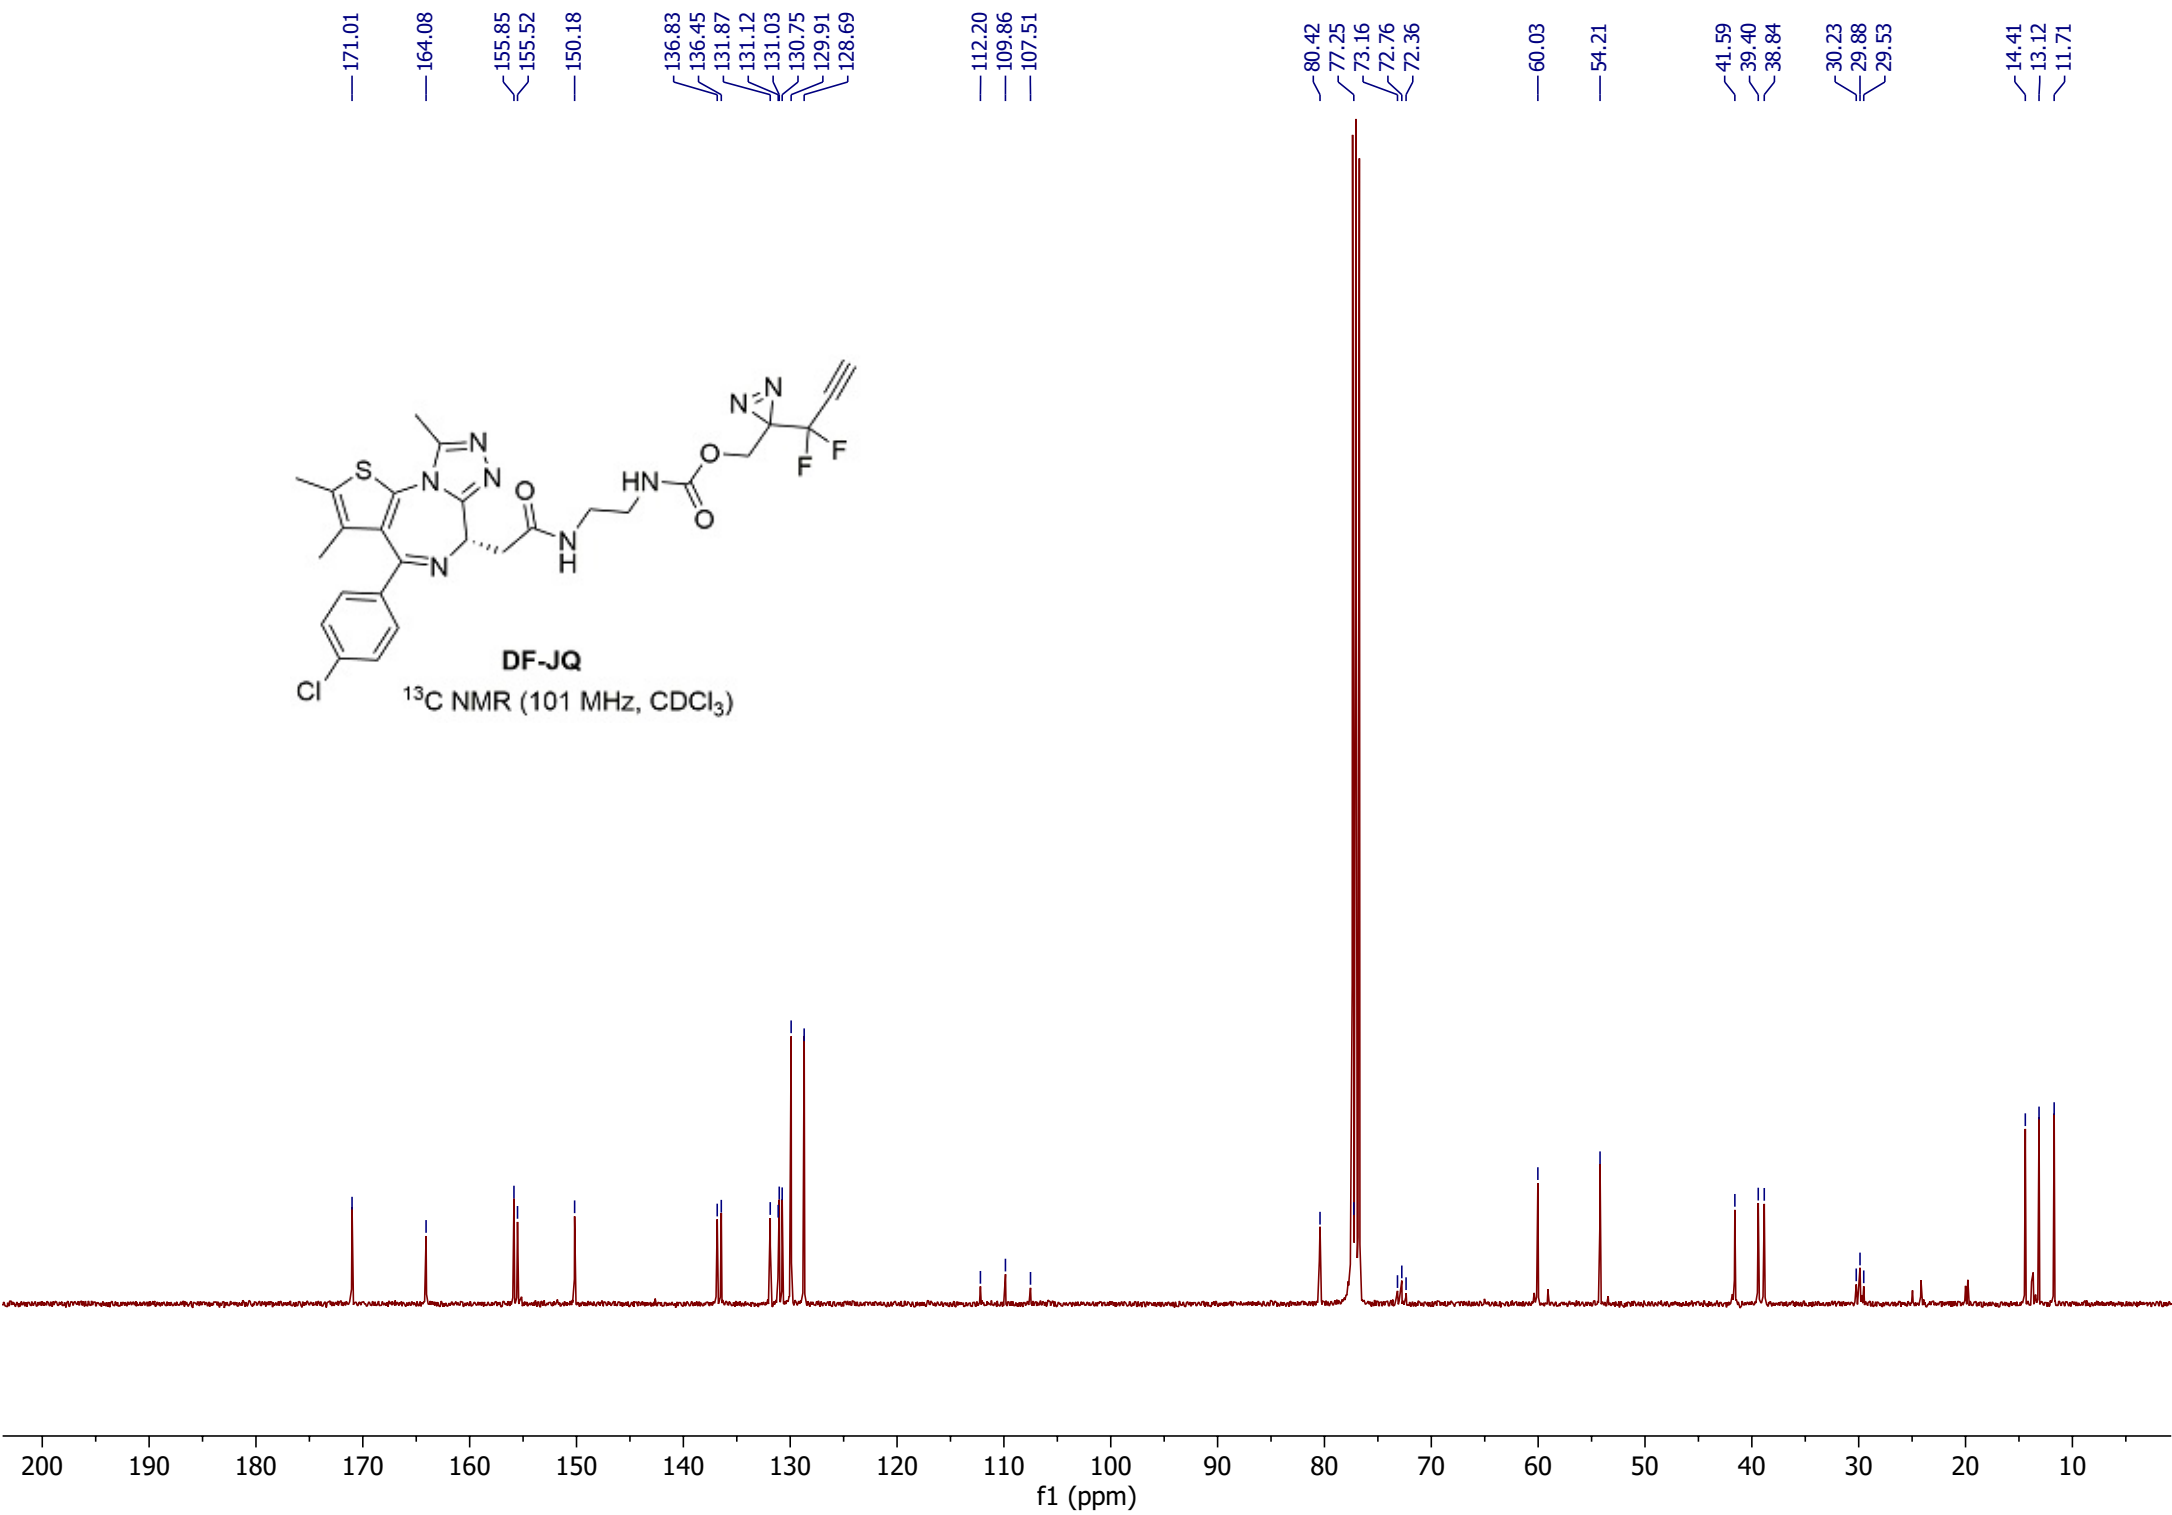

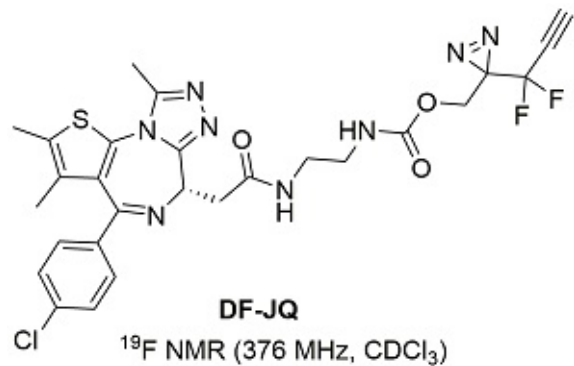

-86.83  
-86.85

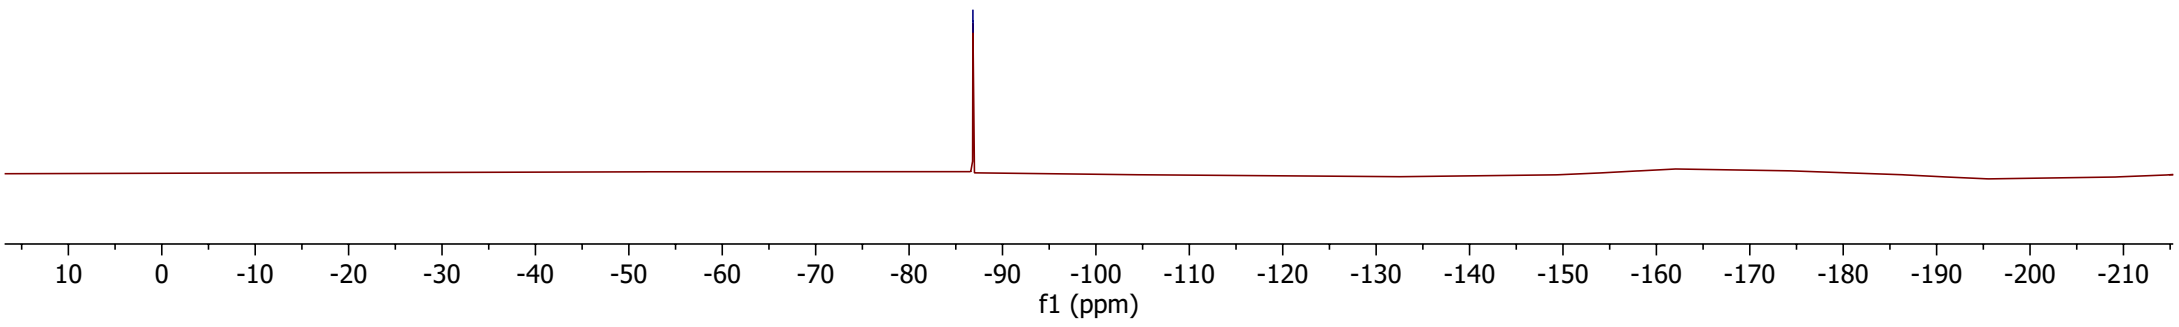

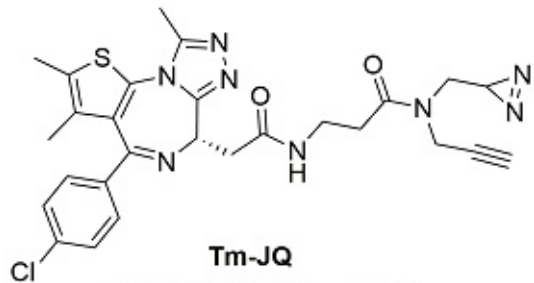

<sup>1</sup>H NMR (600 MHz, CDCl<sub>3</sub>)

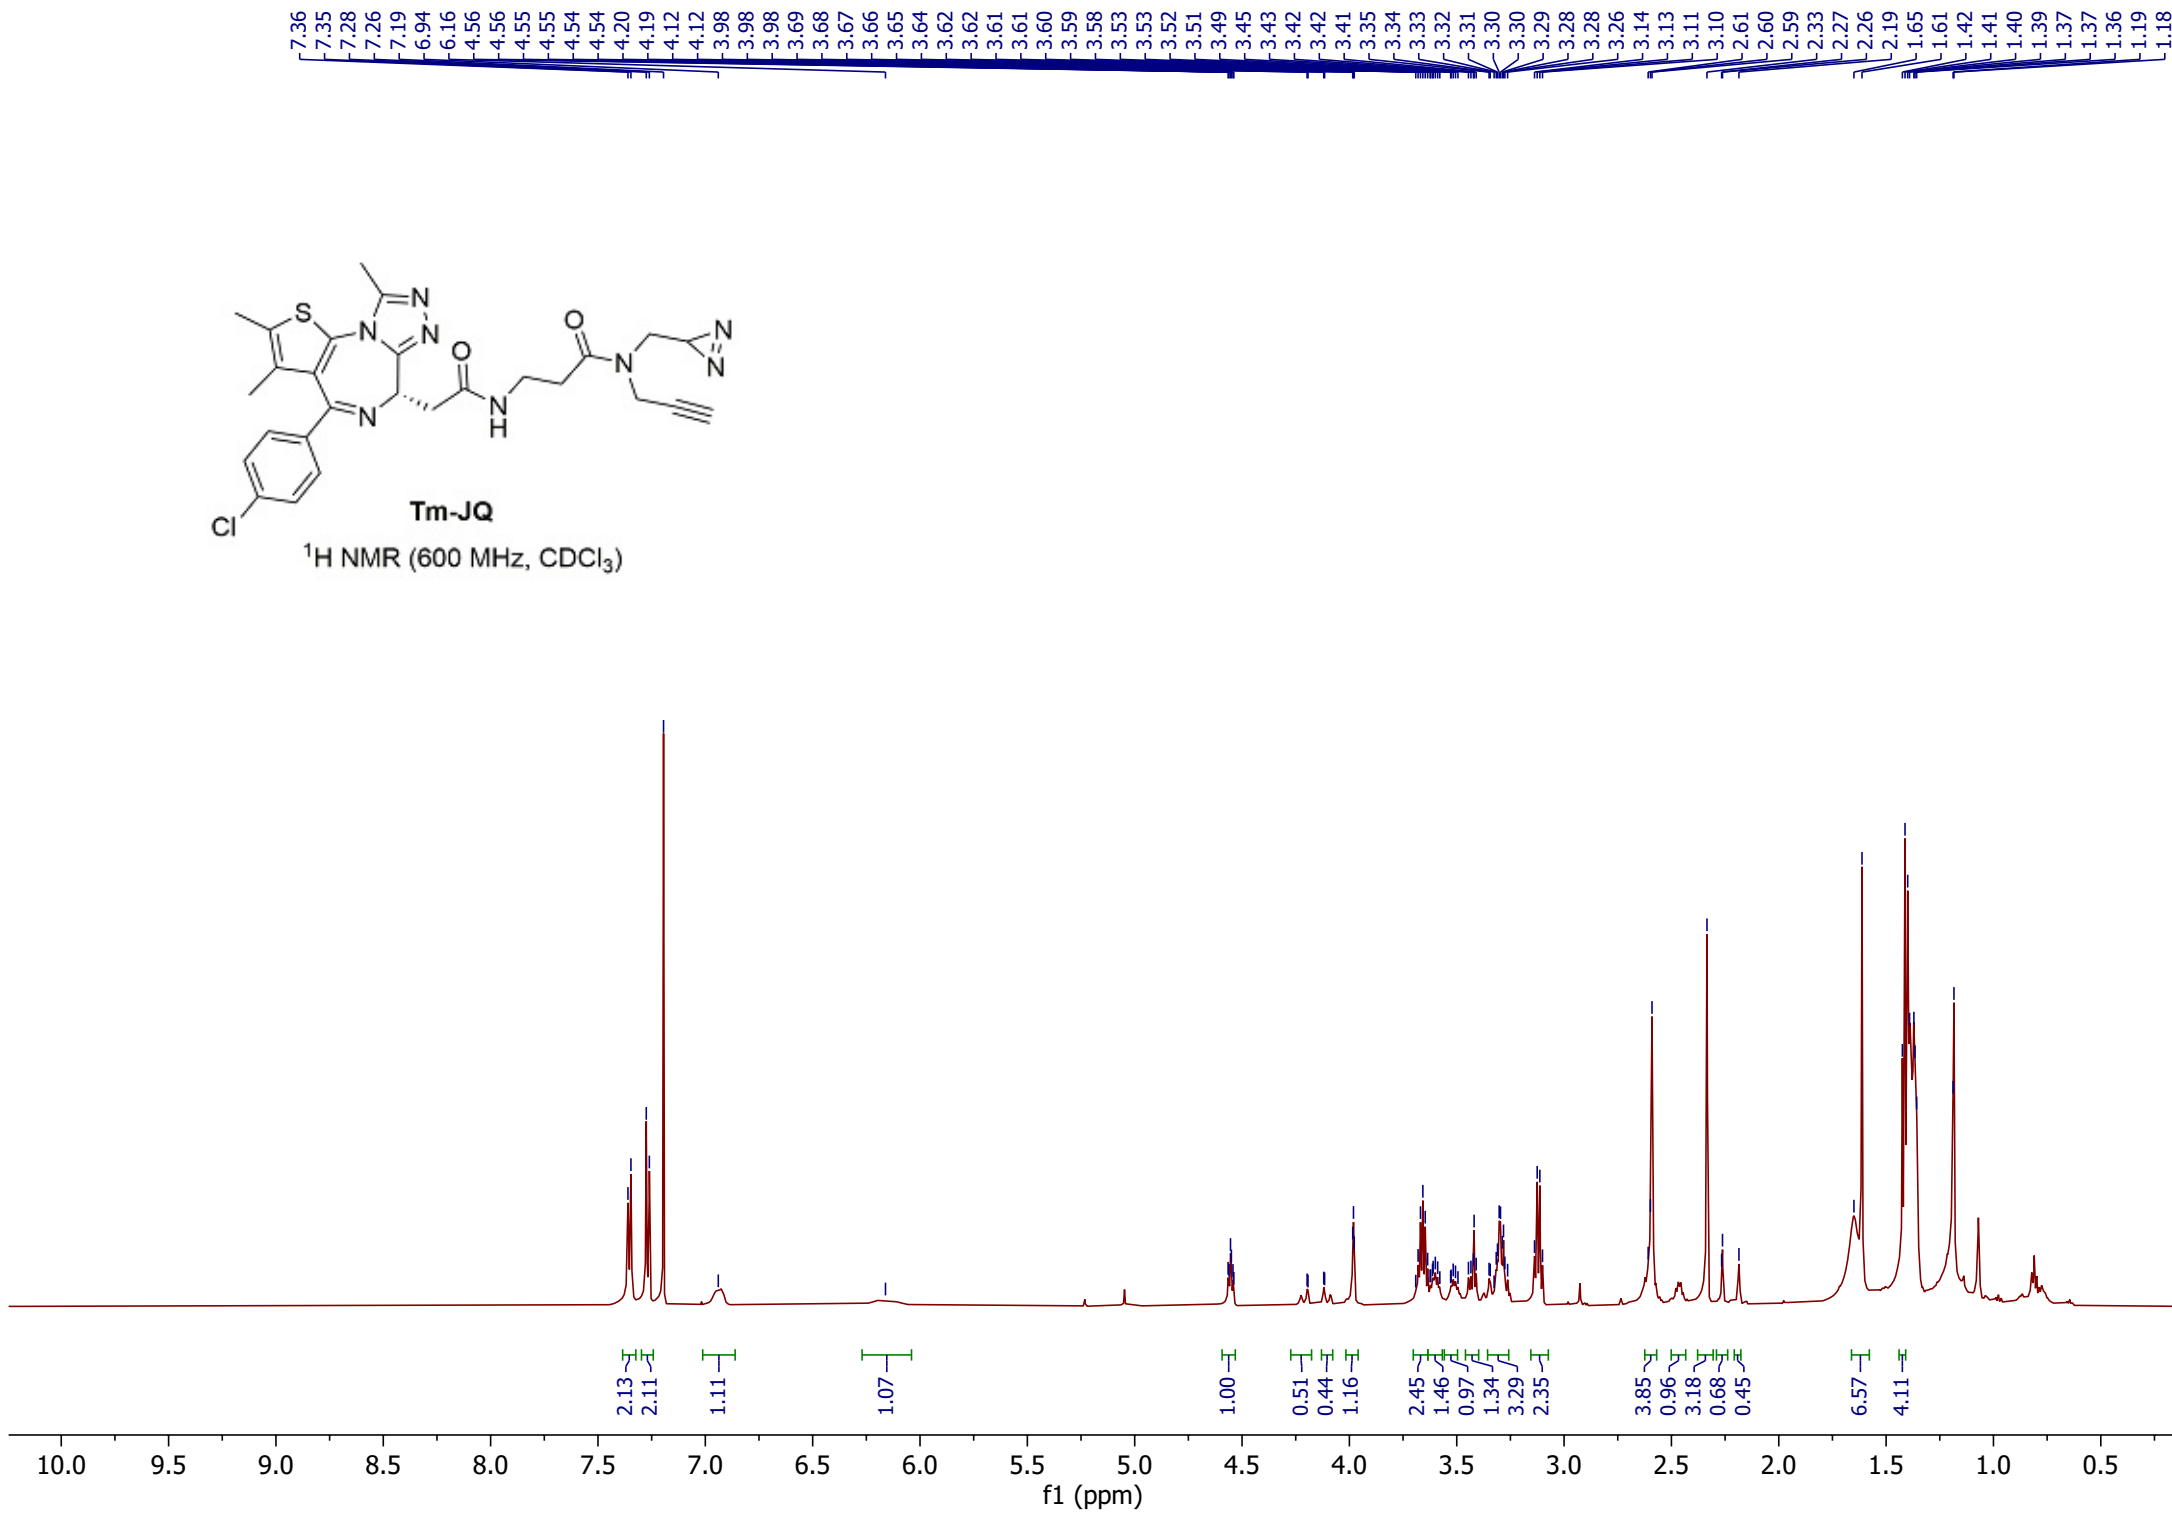

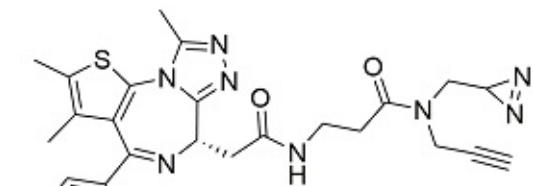

**Tm-JQ**

<sup>13</sup>C NMR (151 MHz, CDCl<sub>3</sub>)

171.74  
171.17  
170.73  
170.66  
164.02  
155.63  
149.91  
136.85  
136.56  
132.14  
130.94  
130.90  
130.48  
129.90  
128.75

77.25  
77.04  
76.83  
73.52  
72.73

55.79  
54.27  
54.23  
45.84  
43.75  
39.06  
38.24  
35.13  
35.08  
33.10  
32.86  
29.72  
19.55  
19.44  
18.62  
17.23  
14.42  
13.12  
12.56  
11.83

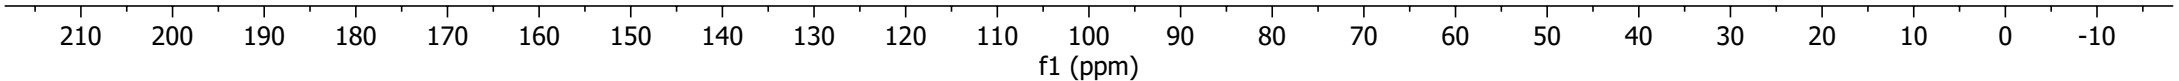

f1 (ppm)
