# Supplementary material for: Evaluation of fully-functionalized diazirine tags for chemical proteomic applications
Source: Chem Sci. 2021 May 7;12(22):7839–47. doi: 10.1039/d1sc01360b (PMC8188597; doi:10.1039/d1sc01360b)
Supplement: SC-012-D1SC01360B-s004 [file SC-012-D1SC01360B-s004.xlsx]

## Sheet: Information
Probe Enrichment Experiments
Probe Series	Treatment concentration	Normalization	Cell Type
F (Benzhydrylazetidine-based)	200 µM	ACACA	HEK293T	Whole cells
JQ (JQ1-based)	10 µM	ACACA	K562	Whole cells
St (Staurosporine-based)	20 µM	ACACA	K562	Lysate
C (Phenyl-based)	20 µM	-	HEK293T	Whole cells
'Membrane' column indicates whether protein has been annotated with one or more transmembrane regions (acquired from Uniprot 2020-12-30)
Peptide Localization (200 µM, HEK293T)
	Mass of adduct
Experiment	Heavy	Light
LD-F-1	551.338	545.324
LD-F-2	551.338	545.324
Ar-F-1	669.305	663.291
Ar-F-2	669.305	663.291
BD-F-1	551.338	545.324
BD-F-2	551.338	545.324
DF-F-1	575.283	569.269
DF-F-2	575.283	569.269
Tm-F-1	523.307	517.293
Tm-F-2	523.307	517.293
List of peptides is limited to those which have been annotated with both heavy and light tags. Each labeling experiment was performed in two replicates

## Sheet: F
					Abundances (TMT-1)													Abundances (TMT-2)									Abundances (TMT-3)													Normalized abundances (ACACA, TMT-1)
Accession	Membrane	Description	Gene Symbol		PSMs	Unique Peptides	LD-C-1	LD-C-2	Ar-C-1	Ar-C-2	DMSO-1	DMSO-2	LD-F-1	LD-F-2	Ar-F-1	Ar-F-2		PSMs	Unique Peptides	BD-C-1	BD-C-2	DMSO-1	DMSO-2	BD-F-1	BD-F-2		PSMs	Unique Peptides	DF-C-1	DF-C-2	Tm-C-1	Tm-C-2	DMSO-1	DMSO-2	DF-F-1	DF-F-2	Tm-F-1	Tm-F-2		LD-C-1	LD-C-2	Ar-C-1	Ar-C-2	DMSO-1	DMSO-2	LD-F-1	LD-F-2	Ar-F-1	Ar-F-2
A0A0B4J2D5	FALSE	Glutamine amidotransferase-like class 1 domain-containing protein 3B, mitochondrial OS=Homo sapiens OX=9606 GN=GATD3B PE=1 SV=1	C21orf33; LOC102724023		17	5	972.7	1306.8	2220.5	2539	178	156.4	2589.7	3577	1281.5	1396.9		49	8	4577.2	4014.9	396.6	307.3	11404	10644.1		24	8	1869	1501.9	1169.5	1108.8	107.9	79.9	3220.6	3655.7	1005.1	1008.3		0.452861	0.57548	1.12911	1.14991	0.04416	0.0422212	1.64488	1.4742	0.575826	0.648183
A0AVF1	FALSE	Intraflagellar transport protein 56 OS=Homo sapiens OX=9606 GN=TTC26 PE=2 SV=1	TTC26		3	2												9	2	420.9	397.1	23.1	26.3	1085.2	1070.6
A0AVT1	FALSE	Ubiquitin-like modifier-activating enzyme 6 OS=Homo sapiens OX=9606 GN=UBA6 PE=1 SV=1	UBA6		9	6	379.7	462.2	516.2	673.8	41.3	34.7	505	699.2	338.9	324.8		20	8	834.4	743.5	62.3	51.8	1480.7	1350.7		6	4	725.1	630.4	845.9	844	60.1	41.5	1053.4	1331.1	463	553.2		0.176777	0.203541	0.262483	0.305163	0.0102461	0.00936749	0.320757	0.288164	0.15228	0.150712
A0FGR8-2	TRUE	Isoform 2 of Extended synaptotagmin-2 OS=Homo sapiens OX=9606 GN=ESYT2	ESYT2		30	13	757.3	882.7	2646.8	3370.6	113.8	137.9	1082.6	1505.9	2030.1	2000		24	11	1227.9	1112.5	100.9	74.3	3743.5	3320.1		7	3	162.8	168.2	160	154.8	6.7	2.8	252.9	276.7	317.8	369.8		0.352577	0.388718	1.34588	1.52654	0.0282326	0.037227	0.687627	0.620631	0.9122	0.928031
A0PJW6	TRUE	Transmembrane protein 223 OS=Homo sapiens OX=9606 GN=TMEM223 PE=1 SV=1	TMEM223		7	3	46	55.7	246	275.8	13.1	11.7	118	133.4	183	203.9																								0.0214163	0.0245288	0.125089	0.124909	0.00324998	0.00315849	0.0749492	0.0549786	0.0822287	0.0946128
A1L0T0	TRUE	Acetolactate synthase-like protein OS=Homo sapiens OX=9606 GN=ILVBL PE=1 SV=2	ILVBL		19	7	329.8	389.5	810.2	995.3	61.8	62.4	530.5	836	676.2	688.9		21	8	863.8	808.9	59.2	46.3	2175.9	1890.9		6	2	98	85.5	85.4	90.4	6.9	4.9	122.1	139.3	142.1	168		0.153545	0.171525	0.41198	0.45077	0.0153319	0.0168453	0.336954	0.344543	0.303842	0.31966
A1X283	FALSE	SH3 and PX domain-containing protein 2B OS=Homo sapiens OX=9606 GN=SH3PXD2B PE=1 SV=3	SH3PXD2B															6	2	682.5	619.1	49.7	51.8	903.5	902.4
A5YKK6	FALSE	CCR4-NOT transcription complex subunit 1 OS=Homo sapiens OX=9606 GN=CNOT1 PE=1 SV=2	CNOT1		10	4	280.4	314.7	411.6	460.1	7.4	22.3	457.1	621	313.5	304.8		6	3	287.5	292.3	21.8	21.1	549.6	468.5															0.130546	0.138586	0.209295	0.208379	0.00183586	0.00602003	0.290333	0.255935	0.140867	0.141432
A6NDG6	FALSE	Glycerol-3-phosphate phosphatase OS=Homo sapiens OX=9606 GN=PGP PE=1 SV=1	PGP		6	4	193	219.1	1019.8	1363.6	57.4	59.1	261.3	358.2	562.1	539.1		3	2	547.8	477.4	62.3	62.9	724.9	645.3		5	3	643.3	595.5	485.9	455.2	46.5	38.1	1239	1502.1	213.4	247.9		0.0898552	0.0964858	0.51856	0.617572	0.0142403	0.0159544	0.165968	0.147626	0.252572	0.250151
A6NDU8	FALSE	UPF0600 protein C5orf51 OS=Homo sapiens OX=9606 GN=C5orf51 PE=1 SV=1	C5orf51		7	3	224.1	274.7	398.1	527.1	32.5	19.2	321.6	437.5	221.1	209.8		11	3	580.2	547.7	38.5	36.1	908.9	802.7		3	2												0.104334	0.120971	0.202431	0.238723	0.00806292	0.00518317	0.204268	0.180308	0.0993485	0.0973505
A6NIH7	FALSE	Protein unc-119 homolog B OS=Homo sapiens OX=9606 GN=UNC119B PE=1 SV=1	UNC119B		6	2	268.1	295.8	137.7	179.3		10.9	282.7	356.1	135.9	138.4		16	4	1105.1	1003.3	81	49.3	3169.7	2673.2															0.12482	0.130262	0.0700193	0.0812047		0.00294253	0.17956	0.146761	0.0610649	0.0642198
L0R6Q1	TRUE	SLC35A4 upstream open reading frame protein OS=Homo sapiens OX=9606 GN=SLC35A4 PE=3 SV=1	SLC35A4		26	6	375	403	5619	6671.3	179.2	224.5	1315.1	1633.3	3714.7	3441.1		33	4	1785.2	1516.5	208.9	190.5	13503.8	11632.6		9	3	382.7	316.1	176.9	161.8	38.7	26.4	823	841	680.7	725.6		0.174589	0.17747	2.85722	3.02142	0.0444577	0.0606052	0.835302	0.673137	1.66915	1.59672
O00115	FALSE	Deoxyribonuclease-2-alpha OS=Homo sapiens OX=9606 GN=DNASE2 PE=1 SV=2	DNASE2															7	3	1181.1	1045.9	86.2	57.9	2267.7	1791.3
O00116	FALSE	Alkyldihydroxyacetonephosphate synthase, peroxisomal OS=Homo sapiens OX=9606 GN=AGPS PE=1 SV=1	AGPS		44	16	1442.1	1645.5	6684.1	7702.9	328.8	266.1	2449.6	3432.1	3632.6	3394.8		54	15	4981.9	4493.7	360.9	290.8	10012.1	9182.3		46	14	4027.4	3622.2	2308.9	2170.1	146.9	123.4	3972	4391.9	1861.7	1992.5		0.6714	0.724634	3.39881	3.48863	0.0815719	0.0718354	1.55589	1.41448	1.63226	1.57524
O00139	FALSE	Kinesin-like protein KIF2A OS=Homo sapiens OX=9606 GN=KIF2A PE=1 SV=3	KIF2A															6	3
O00151	FALSE	PDZ and LIM domain protein 1 OS=Homo sapiens OX=9606 GN=PDLIM1 PE=1 SV=4	PDLIM1		3	3	250	248.9	255.6	312.4	21.5	29.6	246.2	317.7	225.8	196.5		5	3	175	181.6	29.9	23.2	286.3	226.2		11	4	323.1	298.7	278	326.5	31.3	37.1	529.1	603.4	196.2	231.6		0.116393	0.109609	0.129971	0.141486	0.00533393	0.00799071	0.156377	0.130935	0.10146	0.0911791
O00154	FALSE	Cytosolic acyl coenzyme A thioester hydrolase OS=Homo sapiens OX=9606 GN=ACOT7 PE=1 SV=3	ACOT7		10	4	326.9	362.5	636	800.8	54.4	52.3	313.6	400.5	529.5	476		16	4	762.8	678.7	73.6	56	1328.6	1032.8		5	3	291.7	236.5	166	169.6	17.7	20.1	466.6	614.3	123.2	128.9		0.152195	0.159635	0.323401	0.362681	0.0134961	0.0141187	0.199187	0.165059	0.237924	0.220871
O00161	FALSE	Synaptosomal-associated protein 23 OS=Homo sapiens OX=9606 GN=SNAP23 PE=1 SV=1	SNAP23		2	2
O00165	FALSE	HCLS1-associated protein X-1 OS=Homo sapiens OX=9606 GN=HAX1 PE=1 SV=2	HAX1															4	3	115.1	109.5	7.8	6.8	481.3	374.5
O00170	FALSE	AH receptor-interacting protein OS=Homo sapiens OX=9606 GN=AIP PE=1 SV=2	AIP		14	6	357.6	479.2	800.9	987.5	45.9	34.7	633.7	845.4	323.4	382.9		12	6	1097.6	967.1	105.2	70.5	1705.4	1522.4		8	4	395.6	346.2	509.9	476.9	39.8	32.2	755.4	959.9	290.5	338.9		0.166488	0.211027	0.407251	0.447237	0.0113873	0.00936749	0.402503	0.348417	0.145316	0.177672
O00178	FALSE	GTP-binding protein 1 OS=Homo sapiens OX=9606 GN=GTPBP1 PE=1 SV=3	GTPBP1																								4	2	477.8	428.7	434.1	446.1	36.3	27.7	620.6	786.2	336.3	389.3
O00186	FALSE	Syntaxin-binding protein 3 OS=Homo sapiens OX=9606 GN=STXBP3 PE=1 SV=2	STXBP3		3	3												8	3	369	327	28	25.8	567.2	514		5	3	82.6	71	60.8	58.4	6.1	4.3	119.6	161.9	51.4	52.8
O00193	FALSE	Small acidic protein OS=Homo sapiens OX=9606 GN=SMAP PE=1 SV=1	C11orf58		12	3	188	158.4	269	252.4	18.1	18	327.9	255.1	112.3	84.3		15	3	1235.3	1142.8	119.6	99.7	1681.2	1465		14	3	2385.7	1083.2	1121.3	2015.5	131.9	101.9	2360.3	3197.4	1362.5	903.3		0.0875274	0.0697552	0.136784	0.114312	0.00449042	0.00485922	0.20827	0.105135	0.0504606	0.0391165
O00203	FALSE	AP-3 complex subunit beta-1 OS=Homo sapiens OX=9606 GN=AP3B1 PE=1 SV=3	AP3B1		6	3	97.6	110.8	142.1	179.3	8.5	12.4	181.4	253.1	94.5	103.5		4	2	256.8	241.9	23.2	20.4	354.7	314.3															0.0454397	0.0487934	0.0722567	0.0812047	0.00210876	0.00334746	0.115218	0.104311	0.0424624	0.0480256
O00217	FALSE	NADH dehydrogenase [ubiquinone] iron-sulfur protein 8, mitochondrial OS=Homo sapiens OX=9606 GN=NDUFS8 PE=1 SV=1	NDUFS8		10	3	247.2	324.5	838.4	1016.1	60.7	54.6	559.2	742.8	521.4	555.2											7	2	416.8	350.6	147.4	140.1	18.7	13.7	890.7	913.9	415.6	436.8		0.115089	0.142901	0.42632	0.46019	0.015059	0.0147396	0.355183	0.306133	0.234284	0.257621
O00231	FALSE	26S proteasome non-ATPase regulatory subunit 11 OS=Homo sapiens OX=9606 GN=PSMD11 PE=1 SV=3	PSMD11		43	16	4745.7	4842.7	2540.2	3188.2	169.6	155	4101.7	5588.9	2100.4	1967.4		94	16	14393.9	13581.9	975.8	846.2	22920.5	20194.3		44	14	5762.8	5381.7	3308.8	3725.4	221.9	200.3	8953.6	11519.2	3978.8	4547.8		2.20946	2.1326	1.29167	1.44393	0.042076	0.0418433	2.60525	2.30337	0.943788	0.912904
O00232	FALSE	26S proteasome non-ATPase regulatory subunit 12 OS=Homo sapiens OX=9606 GN=PSMD12 PE=1 SV=3	PSMD12		13	7	366.5	404.1	610.3	769.2	37.3	51.2	452.7	576.9	483.2	477.7		10	6	334.3	292.5	30	22.5	379.9	373.7		30	10	744.4	713.1	400.9	417.6	31.5	30.4	1241.8	1535.7	290	370.3		0.170632	0.177955	0.310333	0.34837	0.00925375	0.0138218	0.287538	0.23776	0.21712	0.22166
O00233	FALSE	26S proteasome non-ATPase regulatory subunit 9 OS=Homo sapiens OX=9606 GN=PSMD9 PE=1 SV=3	PSMD9		4	3	61	67.5	71.8	113.3	4.9	3.9	88.1	120.7	46.9	42.5																								0.0283998	0.0297252	0.0365097	0.0513134	0.00121564	0.00105283	0.0559578	0.0497445	0.0210739	0.0197207
O00264	TRUE	Membrane-associated progesterone receptor component 1 OS=Homo sapiens OX=9606 GN=PGRMC1 PE=1 SV=3	PGRMC1		78	8	1902.1	2221.3	4868	5699.5	239.5	202.3	5007.2	6640.4	4185.8	3812.6		136	8	7114.8	6192	370.5	309.3	26691.8	23330.7		77	8	2603.1	2058.7	1784.1	1654.2	90.9	82.6	4722.5	5259.4	5616.9	5990.2		0.885563	0.978202	2.47534	2.5813	0.0594175	0.0546122	3.18039	2.73673	1.88084	1.76911
O00267	FALSE	Transcription elongation factor SPT5 OS=Homo sapiens OX=9606 GN=SUPT5H PE=1 SV=1	SUPT5H		6	4	754.6	970.7	436.4	514.8	41.9	42.4	909.1	1267.4	283.2	381.4		12	6	2318.3	2122.8	190.1	175.9	2640.9	2562.1		9	4	721.2	570	624.7	655.6	87.5	75.3	1124.5	1424.6	459.4	477.8		0.35132	0.42747	0.221906	0.233152	0.010395	0.0114462	0.577426	0.522338	0.127252	0.176976
O00273	FALSE	DNA fragmentation factor subunit alpha OS=Homo sapiens OX=9606 GN=DFFA PE=1 SV=1	DFFA		5	2	181.2	219	255.9	345.8	23.5	16.8	232.7	295.6	186.1	195.2											6	2	330.7	313	267.7	308.8	24.3	20.2	597.2	700.5	184.1	222.3		0.0843615	0.0964418	0.130123	0.156612	0.00583011	0.00453527	0.147802	0.121827	0.0836217	0.0905758
O00273-2	FALSE	Isoform DFF35 of DNA fragmentation factor subunit alpha OS=Homo sapiens OX=9606 GN=DFFA	DFFA															18	4	1321.4	1174	119.4	109.8	1957.2	1763.2
O00299	TRUE	Chloride intracellular channel protein 1 OS=Homo sapiens OX=9606 GN=CLIC1 PE=1 SV=4	CLIC1		45	10	648.4	671.9	2632.3	3642.5	144.4	137.8	578.9	810.6	1537.4	1268.5		45	6	3384.3	3044.2	294.5	260.2	5308.2	4418.1		55	9	3364	2944.1	2073.1	2428.8	304.9	269.4	5232.8	6303.1	1432.7	1626.9		0.301876	0.295887	1.3385	1.64968	0.0358242	0.0372	0.367696	0.334075	0.690811	0.588604
O00303	FALSE	Eukaryotic translation initiation factor 3 subunit F OS=Homo sapiens OX=9606 GN=EIF3F PE=1 SV=1	EIF3F		11	4	453	541	485.8	628.9	35.2	25.1	897.2	1392.7	372.2	401.8		24	8	956.2	829.4	103.3	79.5	1731.8	1487.1		6	4	273.2	258.8	211.7	229.4	24.6	15.2	503.7	665	187.4	217.8		0.210904	0.238242	0.247025	0.284828	0.00873276	0.00677591	0.569868	0.573978	0.167243	0.186441
O00330	FALSE	Pyruvate dehydrogenase protein X component, mitochondrial OS=Homo sapiens OX=9606 GN=PDHX PE=1 SV=3	PDHX																								5	2	496	456.3	274.3	234.5	12.8	14.7	795.6	912.2	219.9	256.9
O00400	TRUE	Acetyl-coenzyme A transporter 1 OS=Homo sapiens OX=9606 GN=SLC33A1 PE=1 SV=1	SLC33A1		12	6	307.8	304	602.7	731.8	19.4	17.7	465.6	563.5	656.5	576.4		7	5	706.2	671.4	58	44.7	2496.7	1984.1		4	2	126.2	101	81.4	66	5.5	5.2	154.9	159.4	188	191.7		0.143303	0.133874	0.306468	0.331431	0.00481294	0.00477823	0.295732	0.232237	0.29499	0.267459
O00410	FALSE	Importin-5 OS=Homo sapiens OX=9606 GN=IPO5 PE=1 SV=4	IPO5		85	27	7707.6	8493.8	8743.5	11622.4	555.4	550.6	8949.3	13804.4	7925.6	7146.3		122	24	16618.7	16658.8	1210.1	1102.5	24403.6	21752.7		51	18	5066.4	4617.2	6298.2	6761.9	411	362.7	7668.3	9639.8	3966	4628.4		3.58844	3.74044	4.446	5.26377	0.137789	0.148638	5.68426	5.68925	3.56127	3.31599
O00411	FALSE	DNA-directed RNA polymerase, mitochondrial OS=Homo sapiens OX=9606 GN=POLRMT PE=1 SV=2	POLRMT															18	7	1757.4	1577.5	132.1	106.9	3464.3	2964.4
O00422	FALSE	Histone deacetylase complex subunit SAP18 OS=Homo sapiens OX=9606 GN=SAP18 PE=1 SV=1	SAP18															3	2	339.4	284.1	44.7	44.8	642.6	524.2		3	2	135	125.8	99.7	92.3	19.7	16.6	208.6	251.1	101	109.2
O00425	FALSE	Insulin-like growth factor 2 mRNA-binding protein 3 OS=Homo sapiens OX=9606 GN=IGF2BP3 PE=1 SV=2	IGF2BP3		28	7	295.2	356.9	282.1	356.9	17.2	18.9	362.2	517.2	234.1	214.2		42	10	1220.4	1117.7	83.6	69.1	2582	2158.8		37	9	982.9	921.6	786.5	830.3	52.2	40.5	1796.7	2188.8	620.8	666.8		0.137437	0.157169	0.143446	0.161639	0.00426714	0.00510218	0.230056	0.213155	0.10519	0.0993921
O00429	FALSE	Dynamin-1-like protein OS=Homo sapiens OX=9606 GN=DNM1L PE=1 SV=2	DNM1L		9	4	345.1	457.9	460.1	534.9	18.1	34.8	700.9	1042.1	299	322.1		26	9	1213	1142.3	103.3	88.4	2133.6	2099.2		6	3	124.3	130.6	149.8	147.8	6.5	3.9	219	260.2	135.6	159.5		0.160669	0.201647	0.233957	0.242255	0.00449042	0.00939449	0.445185	0.429484	0.134352	0.149459
O00442	FALSE	RNA 3'-terminal phosphate cyclase OS=Homo sapiens OX=9606 GN=RTCA PE=1 SV=1	RTCA		8	4	327.4	405	845	1040	40.2	42.3	831.3	1113.1	600.4	606.7		31	8	1814.8	1610.6	155.1	144.9	7895.4	7044.4															0.152428	0.178351	0.429676	0.471014	0.00997321	0.0114192	0.528011	0.458745	0.269782	0.281518
O00461	TRUE	Golgi integral membrane protein 4 OS=Homo sapiens OX=9606 GN=GOLIM4 PE=1 SV=1	GOLIM4		15	9	1534.8	1926.4	325.7	323.6	14	17.1	688.6	946.1	339	347.6		82	23	7210.4	6750.4	452.5	344.8	11055.6	10009.3		11	5	113	104.3	309.8	257.3	10.5	10.3	142	122.3	432.8	401.2		0.714558	0.848335	0.165616	0.146558	0.00347326	0.00461626	0.437373	0.389919	0.152325	0.161292
O00483	TRUE	Cytochrome c oxidase subunit NDUFA4 OS=Homo sapiens OX=9606 GN=NDUFA4 PE=1 SV=1	NDUFA4		14	4	391.9	415	3047.7	3764.8	112	116.6	1552.8	1885.5	3054.5	2111.4		18	4	1893.4	1590.3	145.8	132.5	11411.3	8247.1		13	4	942.3	774.6	382.4	390.3	33.1	24.7	1907.9	1951.6	1095.5	1161.9		0.182457	0.182755	1.54973	1.70507	0.027786	0.0314769	0.98628	0.777077	1.3725	0.979723
O00487	FALSE	26S proteasome non-ATPase regulatory subunit 14 OS=Homo sapiens OX=9606 GN=PSMD14 PE=1 SV=1	PSMD14		13	6	93.2	95.2	262.3	334.9	15.6	14.1	78	139.6	155.7	154.3		24	6	1770.9	1599.2	154	126.3	3589.8	3156.8		17	6	633.4	556.5	498.2	540.9	28.1	21.6	814	1007.8	485.3	549.8		0.0433912	0.0419236	0.133377	0.151676	0.0038702	0.00380639	0.0495427	0.0575338	0.0699618	0.0715976
O00505	FALSE	Importin subunit alpha-4 OS=Homo sapiens OX=9606 GN=KPNA3 PE=1 SV=2	KPNA3		7	2	16.7	20.2	23.5	30.7	2.6	3.3	13.6	20	16.6	16.7		8	2	245.6	234	18.3	17.5	321.5	288.3		7	3	66.1	69.9	65	65	3.7	2.3	122.5	147.8	60.1	73.6		0.00777504	0.00889554	0.0119496	0.013904	0.000645033	0.000890857	0.00863821	0.00824266	0.007459	0.00774906
O00541	FALSE	Pescadillo homolog OS=Homo sapiens OX=9606 GN=PES1 PE=1 SV=1	PES1		6	4	95.4	101.9	73.4	91	4.6	4	121.1	141	64.5	46.2		16	8	1486.1	1393.8	129.8	96	2171.6	1753.4		13	5	476.6	406.8	418.7	383.8	10.3	14.9	711.3	851	265.3	275.5		0.0444155	0.0448741	0.0373233	0.0412138	0.00114121	0.00107983	0.0769182	0.0581108	0.0289823	0.0214375
O00560	FALSE	Syntenin-1 OS=Homo sapiens OX=9606 GN=SDCBP PE=1 SV=1	SDCBP		7	2	619.4	641.1	207.4	256.1	4.7	13.7	833.3	1072.4	198.2	180.2		6	3	875.8	746	52.9	36.4	1622.8	1469.5															0.288375	0.282323	0.105461	0.115987	0.00116602	0.0036984	0.529281	0.441972	0.0890586	0.0836156
O00566	FALSE	U3 small nucleolar ribonucleoprotein protein MPP10 OS=Homo sapiens OX=9606 GN=MPHOSPH10 PE=1 SV=2	MPHOSPH10															8	4	405.6	386.3	31.4	20.8	753.8	671.7
O00567	FALSE	Nucleolar protein 56 OS=Homo sapiens OX=9606 GN=NOP56 PE=1 SV=4	NOP56		31	16	1133.8	1268	1110.1	1344	90.6	78.3	999.8	1312	869.7	858.5		33	14	3912.2	3489.5	409.5	341	3957.5	3417.9		52	19	4383.7	3852.5	3421	3127.2	248.9	227.6	6529.6	7776.3	2012.5	2099.4		0.527864	0.558394	0.564477	0.608696	0.0224769	0.0211376	0.635036	0.540719	0.390789	0.398357
O00571	FALSE	ATP-dependent RNA helicase DDX3X OS=Homo sapiens OX=9606 GN=DDX3X PE=1 SV=3	DDX3X		57	23	3150.5	3629.5	3037.6	4005	203.9	183.2	4434	6377	2136.2	2227.6		91	21	8854.6	8426.4	708.2	619.9	12724	11272.1		49	13	2811.4	2510.6	3103.7	3133.8	198.2	171.3	5494.3	6600.2	2022.2	2392		1.46678	1.59834	1.54459	1.81386	0.0505855	0.049456	2.81631	2.62817	0.959874	1.03364
O00584	FALSE	Ribonuclease T2 OS=Homo sapiens OX=9606 GN=RNASET2 PE=1 SV=2	RNASET2		3	2	116	158.8	24.4	32.5	2.7		182.8	224.8	20.3	24.6		24	5	3886.6	3167.4	235.5	179.3	9796.7	7558.4															0.0540062	0.0699313	0.0124072	0.0147192	0.000669842		0.116108	0.0926475	0.00912155	0.0114148
O00629	FALSE	Importin subunit alpha-3 OS=Homo sapiens OX=9606 GN=KPNA4 PE=1 SV=1	KPNA4		9	3	391.3	347.1	337.1	400.3	16.9	23.5	469.3	689.5	398.7	264.8		17	6	1265	1183.2	104	91.4	2375.9	1973.6															0.182178	0.152854	0.171413	0.181295	0.00419272	0.00634398	0.298082	0.284166	0.179151	0.122871
O00743	FALSE	Serine/threonine-protein phosphatase 6 catalytic subunit OS=Homo sapiens OX=9606 GN=PPP6C PE=1 SV=1	PPP6C		14	5	257.2	293.8	431	530.2	35.4	21.5	611.2	863.7	331.6	291.5		19	4	1042.8	1012.4	102.2	104.9	1657	1417.6		3	2	154.7	131.4	130.1	133.5	14.3	13.8	295.5	373.2	114.3	131.4		0.119745	0.129382	0.21916	0.240127	0.00878238	0.00580407	0.388211	0.355959	0.149	0.135261
O00754	FALSE	Lysosomal alpha-mannosidase OS=Homo sapiens OX=9606 GN=MAN2B1 PE=1 SV=3	MAN2B1															7	4	400.2	346	25.7	12.5	613.6	564
O00762	FALSE	Ubiquitin-conjugating enzyme E2 C OS=Homo sapiens OX=9606 GN=UBE2C PE=1 SV=1	UBE2C		5	3	194.2	201.5	242.5	346.2	17.6	17.6	193.5	272.5	187.4	186.5		4	3	827.5	740.9	52.9	39.1	897.3	695.8		4	2	569.1	468.3	285.4	309.8	19.9	11.7	1424	1716.1	245.7	286.3		0.0904139	0.0887352	0.123309	0.156793	0.00436638	0.00475124	0.122904	0.112306	0.0842058	0.0865389
O00764	FALSE	Pyridoxal kinase OS=Homo sapiens OX=9606 GN=PDXK PE=1 SV=1	PDXK															4	2	158.9	150	17.1	16.1	219	201.8		4	2	53.6	54.6	40.2	38.7	2.7	3.9	61.9	92.9	22	31.8
O00767	TRUE	Acyl-CoA desaturase OS=Homo sapiens OX=9606 GN=SCD PE=1 SV=2	SCD		17	4	567.1	636.5	3482.2	4440	145.5	162.4	1349.5	1631.2	2575.1	2548.2		16	3	923.2	750.8	61.4	47.6	3481.7	3327		14	3	1850.4	1695.2	846.4	716.6	56.4	39.3	2164.1	2079.8	2375.2	2760.7		0.264025	0.280298	1.77067	2.01087	0.0360971	0.0438409	0.857152	0.672272	1.15709	1.1824
O14521	TRUE	Succinate dehydrogenase [ubiquinone] cytochrome b small subunit, mitochondrial OS=Homo sapiens OX=9606 GN=SDHD PE=1 SV=1	SDHD		20	2	494.3	600.8	4655.4	5201	163.6	154.9	2433.6	2957	3750.1	3299.4		41	2	2281.7	1885.5	240.8	203.4	18481.4	15928		9	2	852.2	683.8	487.2	441.1	45.9	33	1556	1616.2	1700.9	1766.8		0.230132	0.264576	2.36723	2.35553	0.0405875	0.0418163	1.54573	1.21868	1.68506	1.53097
O14524	TRUE	Nuclear envelope integral membrane protein 1 OS=Homo sapiens OX=9606 GN=NEMP1 PE=1 SV=2	TMEM194A; NEMP1		13	3	178.5	179.9	938.2	1088.5	41.9	44.3	504.8	656.1	1388.1	960.6																								0.0831044	0.0792232	0.477067	0.49298	0.010395	0.0119591	0.32063	0.270401	0.623725	0.445733
O14530	FALSE	Thioredoxin domain-containing protein 9 OS=Homo sapiens OX=9606 GN=TXNDC9 PE=1 SV=2	TXNDC9															5	2	414.3	384.5	33	23.8	718.3	596.9
O14548	FALSE	Cytochrome c oxidase subunit 7A-related protein, mitochondrial OS=Homo sapiens OX=9606 GN=COX7A2L PE=1 SV=2	COX7A2L		16	6	217.2	252.6	1163.7	1389.8	39.2	41.7	808.3	962.6	960.2	815.7		11	3	1184.7	990.1	84.8	65.3	6374	4795.3															0.101122	0.111238	0.591732	0.629438	0.00972512	0.0112572	0.513402	0.396719	0.431454	0.378498
O14561	FALSE	Acyl carrier protein, mitochondrial OS=Homo sapiens OX=9606 GN=NDUFAB1 PE=1 SV=3	NDUFAB1		2	2	26.4	32.2	54.2	75.6	3.1	3.4	42.3	60.9	51	41.8		3	2	328.3	294.1	27.3	19.3	863.3	705.5		6	2	259.4	192.8	120.3	110.3	11.4	2.3	413.3	505.9	183.4	202.4		0.0122911	0.01418	0.0275603	0.0342391	0.000769078	0.000917852	0.0268674	0.0250989	0.0229162	0.0193959
O14562	FALSE	Ubiquitin domain-containing protein UBFD1 OS=Homo sapiens OX=9606 GN=UBFD1 PE=1 SV=2	UBFD1		4	2	59.5	71.7	127	160.2	4.6	6	62.7	87.6	51.4	73																								0.0277015	0.0315748	0.0645785	0.0725543	0.00114121	0.00161974	0.0398247	0.0361029	0.0230959	0.0338731
O14579	FALSE	Coatomer subunit epsilon OS=Homo sapiens OX=9606 GN=COPE PE=1 SV=3	COPE		6	3	317.1	347.1	254.9	339.8	23.2	21.4	374.6	566.7	224.2	203.1		24	5	1534.6	1530.1	132.8	127	2315.8	1860.5		10	4	414.1	364.7	276	288.7	27.8	25.6	680.8	808.2	200.2	229.2		0.147633	0.152854	0.129615	0.153895	0.00575568	0.00577707	0.237932	0.233556	0.100741	0.0942416
O14617	FALSE	AP-3 complex subunit delta-1 OS=Homo sapiens OX=9606 GN=AP3D1 PE=1 SV=1	AP3D1		22	9	495.1	560.2	808.4	974.6	56.5	49	763.4	1135.7	686.1	700.2		59	20	4525.6	4278	372.4	325.5	10908.2	10112.5		9	4	213	200.4	196.3	210.1	20.1	17.2	300.7	287.7	130.5	150.1		0.230504	0.246697	0.411065	0.441395	0.0140171	0.0132279	0.484883	0.46806	0.30829	0.324904
O14653	TRUE	Golgi SNAP receptor complex member 2 OS=Homo sapiens OX=9606 GN=GOSR2 PE=1 SV=2	GOSR2															3	2
O14654	FALSE	Insulin receptor substrate 4 OS=Homo sapiens OX=9606 GN=IRS4 PE=1 SV=1	IRS4		98	31	3825.4	4182.4	5212.4	6526.7	248.5	255.5	8388	12353.4	3158	2778.2		128	25	11306.3	10471.8	855.1	711.6	21141.9	18633.9		10	6	83.6	83.1	314.5	283	16.5	11.7	174.9	186	420.4	544.8		1.781	1.84182	2.65046	2.95593	0.0616503	0.0689739	5.32774	5.09125	1.41901	1.28913
O14656	FALSE	Torsin-1A OS=Homo sapiens OX=9606 GN=TOR1A PE=1 SV=1	TOR1A		6	3	237.3	275.9	625.9	701.2	32.6	28.9	538.7	721.6	405.8	463.7		4	2	605.3	487.2	38.1	25	2284.4	2207.8															0.11048	0.121499	0.318265	0.317572	0.00808772	0.00780174	0.342162	0.297395	0.182341	0.215164
O14672	TRUE	Disintegrin and metalloproteinase domain-containing protein 10 OS=Homo sapiens OX=9606 GN=ADAM10 PE=1 SV=1	ADAM10															4	2	106.2	94.6	7.9	7.5	265.9	244.8
O14681	TRUE	Etoposide-induced protein 2.4 homolog OS=Homo sapiens OX=9606 GN=EI24 PE=1 SV=4	EI24		10	5	86.1	93.7	548.7	667.8	22.8	20.9	209.2	245.8	617.6	452		14	5	197.1	166	10.8	11.2	854.6	609.2		5	3	394.8	345	197.6	195.9	14.4	11	470.8	476.7	715.5	773.7		0.0400857	0.041263	0.279009	0.302446	0.00565645	0.00564209	0.132876	0.101302	0.277511	0.209735
O14683	TRUE	Tumor protein p53-inducible protein 11 OS=Homo sapiens OX=9606 GN=TP53I11 PE=1 SV=2	TP53I11		3	2
O14734	FALSE	Acyl-coenzyme A thioesterase 8 OS=Homo sapiens OX=9606 GN=ACOT8 PE=1 SV=1	ACOT8															11	4	143.8	128.9	10.5	9.8	488.3	356
O14735	TRUE	CDP-diacylglycerol--inositol 3-phosphatidyltransferase OS=Homo sapiens OX=9606 GN=CDIPT PE=1 SV=1	CDIPT		14	5	216.7	248	1474.7	1634.7	62.3	63.6	433.1	582.7	974.7	780.3											5	2	259.2	226.1	123.5	121.2	7	6.3	307.7	315.7	216.5	247.8		0.100889	0.109213	0.749873	0.740353	0.015456	0.0171692	0.275089	0.24015	0.437969	0.362071
O14737	FALSE	Programmed cell death protein 5 OS=Homo sapiens OX=9606 GN=PDCD5 PE=1 SV=3	PDCD5		21	8	741.4	764.8	329.6	423.3	17.9	27.6	1755.2	2082.5	296	249.6		50	9	1903.1	1745	150.8	129.7	8173.9	6357.3		10	4	472.3	378	237.3	251.6	11.8	11.2	728.3	888.8	365.6	436.1		0.345174	0.336798	0.167599	0.191712	0.00444081	0.0074508	1.11484	0.858267	0.133004	0.115818
O14744	FALSE	Protein arginine N-methyltransferase 5 OS=Homo sapiens OX=9606 GN=PRMT5 PE=1 SV=4	PRMT5		32	12	3122.4	3453.7	1734.6	2060.9	138.8	113.8	2444	3368.4	1612.1	1505.9		75	17	6323.5	6004	566.7	518.4	10312.7	9162.1		63	14	4729.8	5368.9	2020.4	2058.2	172.4	137.2	4231	4787.1	1764.9	2209.6		1.4537	1.52092	0.88203	0.933379	0.0344349	0.0307211	1.55234	1.38823	0.724377	0.698761
O14757	FALSE	Serine/threonine-protein kinase Chk1 OS=Homo sapiens OX=9606 GN=CHEK1 PE=1 SV=2	CHEK1		4	3												21	10	1446.2	1395.9	91.2	77.3	8019.2	6642.1
O14773	FALSE	Tripeptidyl-peptidase 1 OS=Homo sapiens OX=9606 GN=TPP1 PE=1 SV=2	TPP1		27	5	2842.6	3298.9	533.2	638.9	23.8	31.7	3756.4	5876	597.2	630.7		49	4	2780.2	2483.3	157.4	139.1	8399.5	7000.7		14	3	334.2	325.8	1558.1	1464.9	64.7	43.6	492.8	527.8	3404.7	3995.8		1.32343	1.45275	0.271128	0.289357	0.00590454	0.00855762	2.38592	2.42169	0.268344	0.292655
O14776	FALSE	Transcription elongation regulator 1 OS=Homo sapiens OX=9606 GN=TCERG1 PE=1 SV=2	TCERG1		11	6	227.6	277.1	248.3	299.5	24.6	25.8	737.3	1064.8	208.3	200.2		47	18	2150.6	1990.2	249.9	219.2	7328.3	6340.3		10	6	258	231.4	199	177.2	7.9	5.2	318.8	383.3	177.2	195.4		0.105964	0.122027	0.126259	0.135643	0.00610301	0.00696488	0.468305	0.438839	0.0935969	0.0928959
O14787-2	FALSE	Isoform 2 of Transportin-2 OS=Homo sapiens OX=9606 GN=TNPO2	TNPO2		23	4	114	156.5	250.2	266.8	14.4	16.6	212.5	324.4	160.9	190.6		65	7	2708.8	2574.4	234.9	196.5	6359.7	6415.1															0.0530751	0.0689184	0.127225	0.120833	0.00357249	0.00448128	0.134972	0.133696	0.0722984	0.0884414
O14802	FALSE	DNA-directed RNA polymerase III subunit RPC1 OS=Homo sapiens OX=9606 GN=POLR3A PE=1 SV=2	POLR3A															4	2	264.8	241.3	23.6	13.8	479.7	437.4
O14818	FALSE	Proteasome subunit alpha type-7 OS=Homo sapiens OX=9606 GN=PSMA7 PE=1 SV=1	PSMA7		22	9	1735.3	1975.5	2724.3	3019.3	202.7	179.9	3167.9	3908.4	2026.6	1935.1		34	10	5558.4	4642.5	527.9	459.5	9837	8691.3		23	8	3467.4	3005.3	1579.6	1538.4	249.7	168.4	5567.3	6728.7	1529.5	1707.2		0.807905	0.869958	1.38528	1.36744	0.0502878	0.0485652	2.01213	1.61078	0.910627	0.897917
O14828	TRUE	Secretory carrier-associated membrane protein 3 OS=Homo sapiens OX=9606 GN=SCAMP3 PE=1 SV=3	SCAMP3		34	3	655.8	736.2	2269.2	2618.6	106.8	103.9	1052.2	1430.8	1570.5	1560											17	3	623.7	573.6	562.4	545.6	25.3	19	874	910.7	1079	1258.9		0.305321	0.324203	1.15387	1.18596	0.026496	0.0280485	0.668318	0.58968	0.705684	0.723864
O14880	TRUE	Microsomal glutathione S-transferase 3 OS=Homo sapiens OX=9606 GN=MGST3 PE=1 SV=1	MGST3		42	6	375.4	406	4232.3	5237	221.1	206.6	567.5	693.9	5715.7	4488.2		11	4	532.2	481.3	36	32.2	2073.8	1494.2		10	3	618	558.5	365.6	358.7	27	19.7	735.9	752.3	859.2	929.6		0.174775	0.178792	2.15209	2.37183	0.0548526	0.055773	0.360455	0.285979	2.56828	2.08259
O14908	FALSE	PDZ domain-containing protein GIPC1 OS=Homo sapiens OX=9606 GN=GIPC1 PE=1 SV=2	GIPC1		4	2	269.4	362.9	425.8	473.2	27.6	26.3	404.4	585.2	192.3	271.3																								0.125425	0.159812	0.216516	0.214312	0.00684728	0.00709986	0.25686	0.24118	0.0864075	0.125887
O14910	FALSE	Protein lin-7 homolog A OS=Homo sapiens OX=9606 GN=LIN7A PE=1 SV=2	LIN7A		10	3	462	513.9	1845.9	2112.6	86.7	70.8	604.7	721.6	460.4	497																								0.215094	0.226308	0.938625	0.956793	0.0215094	0.0191129	0.384083	0.297395	0.206875	0.230616
O14920	FALSE	Inhibitor of nuclear factor kappa-B kinase subunit beta OS=Homo sapiens OX=9606 GN=IKBKB PE=1 SV=1	IKBKB															6	2
O14925	TRUE	Mitochondrial import inner membrane translocase subunit Tim23 OS=Homo sapiens OX=9606 GN=TIMM23 PE=1 SV=1	TIMM23		27	6	430.6	498.2	1724.2	2065.2	73.9	79.9	1324.7	1700.1	1507.1	1308.4		54	6	2380.3	2068.9	186.7	142.8	10074	9409.5		13	4	1099.8	922.3	316.2	286.5	15.9	10.6	1891	1886.5	1335.1	1372.6		0.200475	0.219394	0.876742	0.935326	0.0183338	0.0215695	0.8414	0.700668	0.677196	0.607118
O14929	FALSE	Histone acetyltransferase type B catalytic subunit OS=Homo sapiens OX=9606 GN=HAT1 PE=1 SV=1	HAT1		31	9	1541.5	1584.1	1300.3	1687	84	76	2176	3120.3	1184.3	935.5		57	9	6063.5	5845.1	407.8	343.1	9530	6981.2		17	7	1149.9	991.8	1219.1	1409.6	100.1	77.1	2095.1	2590.2	774.8	915.7		0.717678	0.697596	0.661192	0.76404	0.0208395	0.0205167	1.38211	1.28598	0.53215	0.434087
O14949	TRUE	Cytochrome b-c1 complex subunit 8 OS=Homo sapiens OX=9606 GN=UQCRQ PE=1 SV=4	UQCRQ		29	4	488.3	564.1	816	1018.9	44.9	43.1	2520.3	3563.1	486.2	459.9		74	5	2074.6	1734.9	180	143	16868.1	14655.6		27	3	322.3	305.9	248.5	238.1	6.4	2.6	793.4	771.6	1317.7	1288.8		0.227338	0.248415	0.414929	0.461458	0.0111392	0.0116351	1.6008	1.46847	0.218468	0.213401
O14950	FALSE	Myosin regulatory light chain 12B OS=Homo sapiens OX=9606 GN=MYL12B PE=1 SV=2	MYL12B; MYL12A		19	6	1769.4	1806	2322.8	2766.3	96.6	107.6	1755.7	2377.9	1321.9	1009.9		24	6	4825.1	4456.9	388.7	322	6501.8	5363.4		24	6	1954.2	1769.9	2091.6	1973.2	120.2	98	5427.4	6057.2	1473.9	1531.2		0.823781	0.795314	1.18112	1.25285	0.0239655	0.0290473	1.11515	0.980012	0.593979	0.468609
O14964	FALSE	Hepatocyte growth factor-regulated tyrosine kinase substrate OS=Homo sapiens OX=9606 GN=HGS PE=1 SV=1	HGS															5	3	396.3	376	28.7	25.6	615.9	538.3
O14967	TRUE	Calmegin OS=Homo sapiens OX=9606 GN=CLGN PE=1 SV=1	CLGN															3	3	420.5	381.8	32.7	35.1	1095.1	1083.9
O14972	FALSE	Down syndrome critical region protein 3 OS=Homo sapiens OX=9606 GN=DSCR3 PE=2 SV=1	DSCR3															4	2
O14975	TRUE	Very long-chain acyl-CoA synthetase OS=Homo sapiens OX=9606 GN=SLC27A2 PE=1 SV=2	SLC27A2		2	2	2.5	2.2	41.2	50.5		2.4	3.9	7.4	20.7	21.9																								0.00116393	0.000968822	0.0209499	0.0228714		0.000647896	0.00247713	0.00304979	0.00930128	0.0101619
O14976	FALSE	Cyclin-G-associated kinase OS=Homo sapiens OX=9606 GN=GAK PE=1 SV=2	GAK		4	4	21.1	24	37.2	44.9			8	18.9	8.7	11.4		4	3	46.8	41.7	6	3.3	48.6	58.5															0.00982355	0.010569	0.0189159	0.0203351			0.0050813	0.00778932	0.00390923	0.00528978
O14979	FALSE	Heterogeneous nuclear ribonucleoprotein D-like OS=Homo sapiens OX=9606 GN=HNRNPDL PE=1 SV=3	HNRNPDL; HNRPDL		91	16	7811.6	8517.4	3811	5008.8	259.9	234.4	16422	22248.3	3760.7	3550.9		158	16	20411.9	19546.3	1575.4	1300.5	56042.1	42132.1		59	9	2732	2321.9	1792.4	1694.8	139.6	105.5	7330.1	8538.9	1557.4	1588.3		3.63685	3.75084	1.93786	2.26848	0.0644785	0.0632778	10.4306	9.16926	1.68982	1.64767
O14980	FALSE	Exportin-1 OS=Homo sapiens OX=9606 GN=XPO1 PE=1 SV=1	XPO1		94	28	5270.2	5623.5	6635.8	8172.4	393.2	382.6	5805.8	8553.8	6104.9	5265.7		121	25	13408.6	13457.2	1040.7	901.6	21483.6	18053.1		46	16	3052.3	2760.4	4173.8	4338.6	316.8	262.1	5530.3	6976.3	2492.1	2908.4		2.45365	2.47644	3.37425	3.70127	0.0975489	0.103285	3.68763	3.5253	2.74316	2.44337
O15042	FALSE	U2 snRNP-associated SURP motif-containing protein OS=Homo sapiens OX=9606 GN=U2SURP PE=1 SV=2	U2SURP		5	2	41.1	60.4	87.7	94.1	16.9	16.4	40	68.2	28.9	45.8		10	5	389.3	379.9	50.4	45.2	404.7	358.6		12	5	168.5	137.5	264.6	285.1	99	78.1	238.5	314.1	137.9	136.1		0.019135	0.0265986	0.0445947	0.0426178	0.00419272	0.00442729	0.0254065	0.0281075	0.0129858	0.0212519
O15067	FALSE	Phosphoribosylformylglycinamidine synthase OS=Homo sapiens OX=9606 GN=PFAS PE=1 SV=4	PFAS		27	10	445.2	645.3	650.3	915.5	61.4	65.6	540	855.8	330.5	417.8		56	16	4351.6	4116.2	445	412.2	4082.3	3877.4		24	9	956.7	898.6	1096.2	1082.2	88.3	70.7	1194.2	1490.1	689.6	860.7		0.207272	0.284173	0.330672	0.414629	0.0152327	0.0177091	0.342988	0.352704	0.148506	0.193866
O15091	FALSE	Mitochondrial ribonuclease P catalytic subunit OS=Homo sapiens OX=9606 GN=KIAA0391 PE=1 SV=2	KIAA0391		4	2	341.2	451.6	419	567.1	28.8	28.3	729.6	1128.9	273	264.7		5	3	1227.4	1108.4	72.8	61.7	2264.2	1973.1															0.158853	0.198873	0.213058	0.256839	0.00714498	0.00763977	0.463415	0.465257	0.122669	0.122825
O15111	FALSE	Inhibitor of nuclear factor kappa-B kinase subunit alpha OS=Homo sapiens OX=9606 GN=CHUK PE=1 SV=2	CHUK		4	3	149.2	161.1	158.8	211.4	12.3	11.8	193.9	280.7	85.3	85.8		7	3	1595.9	1522.3	134.1	120.6	2438.4	2017.6															0.0694632	0.0709442	0.0807485	0.0957428	0.0030515	0.00318549	0.123158	0.115686	0.0383285	0.0398125
O15118	TRUE	NPC intracellular cholesterol transporter 1 OS=Homo sapiens OX=9606 GN=NPC1 PE=1 SV=2	NPC1		11	5	1025.7	958.3	468.3	590.6	29.8	17.7	672.6	917.2	504	406.3		22	6	1855.7	1788.2	127.7	111.3	3190.8	2531.2		6	2	270.6	250.2	854.5	774.8	40.3	27.8	331.9	330.5	1318.2	1380		0.477536	0.42201	0.238127	0.267482	0.00739307	0.00477823	0.42721	0.378009	0.226466	0.18853
O15121	TRUE	Sphingolipid delta(4)-desaturase DES1 OS=Homo sapiens OX=9606 GN=DEGS1 PE=1 SV=1	DEGS1		13	3	224.5	254.1	1395.3	1753.1	64.8	60.6	400.2	526.7	858.6	903.9		9	3	122.2	104.3	14.6	13.8	344.7	331.3															0.104521	0.111899	0.709499	0.793976	0.0160762	0.0163594	0.254192	0.217071	0.385801	0.419424
O15126	TRUE	Secretory carrier-associated membrane protein 1 OS=Homo sapiens OX=9606 GN=SCAMP1 PE=1 SV=2	SCAMP1		9	4	119.4	133.1	648.4	771.2	21.6	22.2	176.8	225.7	440.5	431.5		5	2	540.9	481.2	46.2	34.8	1285.8	1180.5		7	2	250.2	248.8	241.3	238	14.1	13.9	345.5	337.9	511.9	569.9		0.0555892	0.0586137	0.329706	0.349275	0.00535874	0.00599304	0.112297	0.0930185	0.197933	0.200223
O15127	TRUE	Secretory carrier-associated membrane protein 2 OS=Homo sapiens OX=9606 GN=SCAMP2 PE=1 SV=2	SCAMP2		17	4	852	823.1	1927.6	2251.5	64.8	64.7	1357.8	1682.2	1629	1301.4		27	5	3461.9	3269.4	328.2	238.6	5104.8	4220.9		19	4	425.9	393.4	602.3	591.2	40.6	41.2	510.5	549	2692	2771.7		0.396667	0.362471	0.980169	1.0197	0.0160762	0.0174662	0.862424	0.69329	0.73197	0.60387
O15144	FALSE	Actin-related protein 2/3 complex subunit 2 OS=Homo sapiens OX=9606 GN=ARPC2 PE=1 SV=1	ARPC2		9	4	724.6	759.4	597.8	784.6	41.1	35.4	570.3	724.6	461.4	389.1		12	5	1127.2	979	101.6	86.2	1978.7	1752.2		15	6	1608.7	1411.7	748.3	828.2	78.5	53.6	1803.1	2053.2	697.5	774.3		0.337353	0.33442	0.303976	0.355344	0.0101965	0.00955646	0.362233	0.298632	0.207324	0.180548
O15155	TRUE	BET1 homolog OS=Homo sapiens OX=9606 GN=BET1 PE=1 SV=1	BET1															10	2	387.7	326.8	31	25.1	1666.2	1313.3		11	2	467.3	421.7	241.3	215.5	13.7	7.2	576.4	634.2	585	663.7
O15173	TRUE	Membrane-associated progesterone receptor component 2 OS=Homo sapiens OX=9606 GN=PGRMC2 PE=1 SV=1	PGRMC2		33	6	1012.2	1265.4	1279.7	1572.5	53.6	60.5	2066.5	3256.3	990.6	1057.7		112	10	6404.6	5786.2	612.2	529.7	22467.2	20450.5		40	4	1528.7	1373.8	672.1	652.5	42.5	22.1	2334.1	2504.7	2202.8	2350.8		0.471251	0.557249	0.650717	0.712183	0.0132976	0.0163324	1.31256	1.34203	0.445113	0.490789
O15212	FALSE	Prefoldin subunit 6 OS=Homo sapiens OX=9606 GN=PFDN6 PE=1 SV=1	PFDN6		3	3	98.7	92.4	59.4	64.3	4.8	4.7	123.1	159.4	57.8	42.5		3	2																					0.0459519	0.0406905	0.0302044	0.0291214	0.00119083	0.0012688	0.0781885	0.065694	0.0259717	0.0197207
O15226	FALSE	NF-kappa-B-repressing factor OS=Homo sapiens OX=9606 GN=NKRF PE=1 SV=2	NKRF		7	4	457.2	506.8	422.3	476	26.6	26.7	502.6	699.9	379.9	318.1		9	6	398	355	35.3	31.9	562.2	524.1															0.212859	0.223181	0.214736	0.21558	0.00659919	0.00720784	0.319233	0.288452	0.170703	0.147603
O15228	FALSE	Dihydroxyacetone phosphate acyltransferase OS=Homo sapiens OX=9606 GN=GNPAT PE=1 SV=1	GNPAT		12	6	363.4	450.1	1282.2	1744.8	69.9	66.2	797.6	1289.1	980.9	980.3		29	7	1249	1131.7	85	80.6	4635	3914.4		5	2	144.4	144.1	144.7	129	8.3	6	156.5	196.8	220.4	240.6		0.169189	0.198212	0.651988	0.790217	0.0173415	0.0178711	0.506606	0.531281	0.440755	0.454874
O15258	TRUE	Protein RER1 OS=Homo sapiens OX=9606 GN=RER1 PE=1 SV=1	RER1		21	4	372.9	393.7	1960.2	2460.7	91.5	120.3	694.9	877.4	1716.3	1443.7		19	4	1127	1011.9	73.7	61.8	5807.9	4785.9		11	3	514.6	477.3	256	254.7	9.1	4.6	698.3	736.4	882.8	1002.4		0.173611	0.173375	0.996746	1.11445	0.0227002	0.0324758	0.441374	0.361606	0.771197	0.669899
O15260	TRUE	Surfeit locus protein 4 OS=Homo sapiens OX=9606 GN=SURF4 PE=1 SV=3	SURF4		21	4	132.2	127.4	407.7	523.1	13.7	12.2	153.8	221.3	358.9	283.9		23	3	542.2	615.8	31	32.7	1298.6	1110.5		7	2	181.6	142	131.2	132.4	3.4	5.8	165	207.3	285	336.2		0.0615485	0.0561036	0.207312	0.236911	0.00339883	0.00329347	0.097688	0.0912051	0.161267	0.131734
O15269	TRUE	Serine palmitoyltransferase 1 OS=Homo sapiens OX=9606 GN=SPTLC1 PE=1 SV=1	SPTLC1		32	13	1013.2	1150.5	1398.2	1770.4	72.2	69.9	2246.2	3054.9	825.5	813.7		63	14	2863.1	2566.7	203.7	161.6	10900.1	9237.4		22	9	936.3	872	894.4	845.9	57.4	39.2	1400.6	1385	2560.9	2771.9		0.471717	0.50665	0.710973	0.801812	0.0179121	0.01887	1.4267	1.25903	0.370928	0.377569
O15270	TRUE	Serine palmitoyltransferase 2 OS=Homo sapiens OX=9606 GN=SPTLC2 PE=1 SV=1	SPTLC2		5	4	94.3	117.2	377.1	430.8	12.3	19.6	197.2	286.2	228.5	227.2		11	5	273.2	256.9	22.9	29	1121.7	928.3															0.0439033	0.0516118	0.191752	0.195109	0.0030515	0.00529115	0.125254	0.117953	0.102674	0.105424
O15294	FALSE	UDP-N-acetylglucosamine--peptide N-acetylglucosaminyltransferase 110 kDa subunit OS=Homo sapiens OX=9606 GN=OGT PE=1 SV=3	OGT		11	4	233.7	304.3	344	457	30.4	21	291.6	409.2	193.2	237.4		18	9	1704.9	1565.7	132.1	102.1	1498.7	1385.5		6	3	206	218	210.7	212.9	20.2	12.2	355.6	391	147	178.8		0.108804	0.134006	0.174921	0.206975	0.00754193	0.00566909	0.185213	0.168645	0.086812	0.110157
O15320	TRUE	Endoplasmic reticulum export factor CTAGE5 OS=Homo sapiens OX=9606 GN=CTAGE5 PE=1 SV=4	CTAGE5; MIA2															14	7	361.1	338.7	76.2	63.2	726.8	735.8
O15321	TRUE	Transmembrane 9 superfamily member 1 OS=Homo sapiens OX=9606 GN=TM9SF1 PE=2 SV=2	TM9SF1		7	4	87.5	94.4	122.4	154.6	6.1	5.9	138	209.5	115.9	119		15	4	708.3	685.2	47	43.3	2210.7	2011.3															0.0407375	0.0415713	0.0622394	0.0700181	0.00151335	0.00159274	0.0876524	0.0863419	0.0520782	0.0552179
O15344	FALSE	E3 ubiquitin-protein ligase Midline-1 OS=Homo sapiens OX=9606 GN=MID1 PE=1 SV=1	MID1		3	2	119.6	125.2	154.2	171.5	7.2	6.6	225.8	265	91.1	83.5																								0.0556823	0.0551348	0.0784094	0.0776721	0.00178625	0.00178171	0.14342	0.109215	0.0409346	0.0387453
O15347	FALSE	High mobility group protein B3 OS=Homo sapiens OX=9606 GN=HMGB3 PE=1 SV=4	HMGB3		14	4	867.1	912.1	1458.1	1655	104.2	95.1	782.4	954.6	1036.4	891.5		14	4	1239.6	1023.4	102.2	88.4	3161.7	2407.3		19	5	1978.6	1588.9	946.4	872.7	86.9	71.8	1915.5	2329.9	636.1	674.8		0.403697	0.401665	0.741432	0.749547	0.0258509	0.0256729	0.496951	0.393422	0.465693	0.41367
O15355	FALSE	Protein phosphatase 1G OS=Homo sapiens OX=9606 GN=PPM1G PE=1 SV=1	PPM1G		29	9	1069.7	1447.8	1319.4	1621.8	98.5	86.7	1788.5	2452.6	831	1068.4		51	13	5642.8	4959.4	484.2	374.5	6701.1	6581		30	7	1508.9	1382.5	1424.8	1406.3	127.3	95.2	2649.3	3239.2	1089.9	1212.9		0.498021	0.637573	0.670904	0.734511	0.0244368	0.0234052	1.13599	1.0108	0.373399	0.495754
O15371	FALSE	Eukaryotic translation initiation factor 3 subunit D OS=Homo sapiens OX=9606 GN=EIF3D PE=1 SV=1	EIF3D		22	7	818	925.8	903.9	1106.2	74.8	62.8	1156.4	1691.7	769.4	739.4		32	9	3012.9	2842.2	280.1	212.8	4698.6	4060.9		27	8	1993.1	1806.9	2032.2	2074.7	151.5	124.4	3528	4413.5	1374.6	1642.5		0.380837	0.407698	0.459626	0.500996	0.0185571	0.0169533	0.734502	0.697206	0.34572	0.343093
O15372	FALSE	Eukaryotic translation initiation factor 3 subunit H OS=Homo sapiens OX=9606 GN=EIF3H PE=1 SV=1	EIF3H		33	11	1515.8	1551	992.8	1225.9	77.3	57.4	1985.3	2645.3	874.3	777.2		70	13	5004.9	4639.5	368.4	349.7	11595.9	10021.8		20	8	563.7	501.3	482.6	525.5	35.3	29.5	1048.1	1325.4	424	482.5		0.705713	0.683019	0.504831	0.555208	0.0191773	0.0154955	1.26099	1.09022	0.392856	0.360633
O15382	FALSE	Branched-chain-amino-acid aminotransferase, mitochondrial OS=Homo sapiens OX=9606 GN=BCAT2 PE=1 SV=2	BCAT2															12	3	991.5	841.2	76.3	52.5	3912.8	3843.7		3	2	340	301.9	188.2	155.8	13.6	8.2	521.2	639.6	149.5	163
O15397	FALSE	Importin-8 OS=Homo sapiens OX=9606 GN=IPO8 PE=1 SV=2	IPO8		11	6	188.1	235.6	176.5	209.1	12.1	12.2	415.2	647.8	153.5	148.6		28	12	1935.8	1899.2	143.7	148.1	3822.1	3218.5															0.0875739	0.103752	0.0897488	0.0947011	0.00300189	0.00329347	0.26372	0.26698	0.0689733	0.0689527
O15400	TRUE	Syntaxin-7 OS=Homo sapiens OX=9606 GN=STX7 PE=1 SV=4	STX7															9	2	458	396.4	27.9	28.5	1781.9	1497.6
O15479	FALSE	Melanoma-associated antigen B2 OS=Homo sapiens OX=9606 GN=MAGEB2 PE=1 SV=3	MAGEB2		3	2	226	228.5	232.7	328.1	20.8	22.5	374.6	530.9	158.6	127.1		3	2	522.7	528	41.9	28.6	1231.6	993.6		4	2	132	127	138.8	147	8.8	8.6	201.8	246.3	100.8	123.6		0.105219	0.100625	0.118326	0.148596	0.00516027	0.00607402	0.237932	0.218802	0.0712649	0.0589764
O15498	FALSE	Synaptobrevin homolog YKT6 OS=Homo sapiens OX=9606 GN=YKT6 PE=1 SV=1	YKT6		20	8	454.4	459.6	1296.1	1809.8	63.6	74.8	760.7	985.4	1132.9	898.4		24	7	2041.4	1880.6	138.6	127.5	7119.9	5896.3		9	3	235.5	194.4	148.1	154.2	11.7	11.2	499.7	587.2	267	308.2		0.211555	0.202396	0.659056	0.819656	0.0157785	0.0201927	0.483168	0.406116	0.509054	0.416872
O15541	FALSE	E3 ubiquitin-protein ligase RNF113A OS=Homo sapiens OX=9606 GN=RNF113A PE=1 SV=1	RNF113A															3	2	82.6	93.8	11.8	8.7	127.3	110.3
O43143	FALSE	Pre-mRNA-splicing factor ATP-dependent RNA helicase DHX15 OS=Homo sapiens OX=9606 GN=DHX15 PE=1 SV=2	DHX15		53	18	1876.9	1999.7	2177.4	2725.7	155.5	124.7	2945.3	3902.3	1679.4	1432		59	17	3984	3870.2	315.8	323	5941	4895.5		32	11	960.5	892.5	1206.7	1240.8	95	66.5	1613	1842.8	842.3	970.2		0.87383	0.880615	1.10719	1.23447	0.0385779	0.0336636	1.87074	1.60827	0.754617	0.66447
O43169	TRUE	Cytochrome b5 type B OS=Homo sapiens OX=9606 GN=CYB5B PE=1 SV=2	CYB5B		75	5	1707.7	2052.3	8573.9	11238	279.8	377.1	8322.8	11713.7	7155.9	6747.2		81	6	4390.1	3506.7	173.7	113.6	40564	33201.9		29	5	1746.3	1474.3	1139.5	1094.5	53.7	26.7	2317.1	2422	5081.1	5176.7		0.795056	0.903778	4.35976	5.08967	0.0694155	0.101801	5.28633	4.8276	3.21541	3.13081
O43172-2	FALSE	Isoform 2 of U4/U6 small nuclear ribonucleoprotein Prp4 OS=Homo sapiens OX=9606 GN=PRPF4	PRPF4		5	3	384.2	373.9	312.7	366	21.7	18.7	520.2	641	317.2	261.5		5	3	62.1	54.2	2.2		100.3	97.4		5	3	461.6	404.9	420.6	420.9	32.9	19.8	842.2	951.3	242.8	295.6		0.178872	0.164656	0.159005	0.165761	0.00538355	0.00504819	0.330412	0.264177	0.14253	0.12134
O43175	FALSE	D-3-phosphoglycerate dehydrogenase OS=Homo sapiens OX=9606 GN=PHGDH PE=1 SV=4	PHGDH		186	22	6212	6580.3	44378.1	56346.1	1616.7	1894.8	10034.8	13703.3	9201	8234.7		128	18	24025.8	22192.5	1862.1	1636.4	42759.6	35472.5		128	18	10584.6	9866.3	9427.5	10974.9	767.9	620.8	17509.5	22459.8	6765.5	7771.6		2.89213	2.89779	22.5659	25.5191	0.401087	0.511514	6.37373	5.64758	4.13435	3.82103
O43242	FALSE	26S proteasome non-ATPase regulatory subunit 3 OS=Homo sapiens OX=9606 GN=PSMD3 PE=1 SV=2	PSMD3		55	18	4008.3	4555.5	3969.3	4993	293.2	252.1	4404	5817.2	3261.6	3039		62	16	9122.2	8172.4	714.8	607.9	12833.9	11629.5		56	17	5477.6	5005.6	3393.4	3599.1	258	225.1	7304.3	7616.5	3100.4	3607.5		1.86615	2.00612	2.01836	2.26132	0.0727399	0.068056	2.79726	2.39746	1.46556	1.41014
O43251-8	FALSE	Isoform 8 of RNA binding protein fox-1 homolog 2 OS=Homo sapiens OX=9606 GN=RBFOX2	RBFOX2		10	2	136.3	164.1	61.5	80.9			403.8	556.8	48.3	54.2		16	3	1446.7	1340.7	92.3	72.1	4307.7	3348.3															0.0634573	0.0722653	0.0312722	0.0366395			0.256479	0.229476	0.021703	0.0251496
O43252	FALSE	Bifunctional 3'-phosphoadenosine 5'-phosphosulfate synthase 1 OS=Homo sapiens OX=9606 GN=PAPSS1 PE=1 SV=2	PAPSS1		9	4	642.4	857.3	435.2	611.8	36.7	35	618.4	791	298.6	323.6		7	3	1237.2	1189.6	113.7	95.4	1201.2	1101.6		5	3	114.2	101.1	133.4	148	10.8	8.2	222.9	258.6	92.8	112.8		0.299083	0.377532	0.221296	0.277083	0.00910489	0.00944848	0.392785	0.325997	0.134172	0.150155
O43264	FALSE	Centromere/kinetochore protein zw10 homolog OS=Homo sapiens OX=9606 GN=ZW10 PE=1 SV=3	ZW10		15	8	143.4	186.8	302.7	401.4	15	12.5	132	219.1	147.1	152.1		15	6	1853.8	1841.8	137.1	113.8	2317.5	2011.8		2	2												0.0667629	0.0822618	0.15392	0.181793	0.00372135	0.00337446	0.0838415	0.0902984	0.0660975	0.0705768
O43290	FALSE	U4/U6.U5 tri-snRNP-associated protein 1 OS=Homo sapiens OX=9606 GN=SART1 PE=1 SV=1	SART1															2	2								3	2	167.9	167.1	157.6	155.2	9.5	8.1	289.3	369.3	134.1	146.7
O43292	TRUE	Glycosylphosphatidylinositol anchor attachment 1 protein OS=Homo sapiens OX=9606 GN=GPAA1 PE=1 SV=3	GPAA1		6	2												13	5	432	371.2	34.1	27.6	1793	1679.7		6	2	225.4	201	143.6	139.8	9.5	2.9	266.5	289.1	384.8	385.1
O43324	FALSE	Eukaryotic translation elongation factor 1 epsilon-1 OS=Homo sapiens OX=9606 GN=EEF1E1 PE=1 SV=1	EEF1E1																								3	2
O43347	FALSE	RNA-binding protein Musashi homolog 1 OS=Homo sapiens OX=9606 GN=MSI1 PE=1 SV=1	MSI1		5	2	191.1	241.6	247.1	313.2	20.8	19.6	542.4	867.1	168.7	192.7		16	6	1036.3	957.1	91.7	71.3	2837.1	2527.3		4	2	214.5	211.1	214.7	214.3	22	15.2	701.5	824.2	358.6	439.7		0.0889706	0.106394	0.125648	0.141848	0.00516027	0.00529115	0.344512	0.357361	0.0758032	0.0894158
O43390	FALSE	Heterogeneous nuclear ribonucleoprotein R OS=Homo sapiens OX=9606 GN=HNRNPR PE=1 SV=1	HNRNPR		157	21	12159.6	13800	4407	5540.1	395.5	395.2	17956.4	27152.5	4187.2	4035.2											134	20	12485	11551.1	10989.6	11140.4	711.4	614.5	23511	24985.9	7326.1	7757.7		5.66116	6.07715	2.24092	2.5091	0.0981195	0.106687	11.4052	11.1904	1.88146	1.8724
O43395	FALSE	U4/U6 small nuclear ribonucleoprotein Prp3 OS=Homo sapiens OX=9606 GN=PRPF3 PE=1 SV=2	PRPF3																								4	3	46.5	42.4	35.2	36.8	4.1		90.7	99.3	23.8	19.7
O43396	FALSE	Thioredoxin-like protein 1 OS=Homo sapiens OX=9606 GN=TXNL1 PE=1 SV=3	TXNL1		40	9	618.2	661.8	6641.3	9395.8	273.7	369.9	951.3	1257.4	1497.6	1318.4		6	3	920.9	850.6	97.1	84.5	1213.3	1086.9															0.287816	0.291439	3.37705	4.25534	0.0679022	0.0998569	0.60423	0.518216	0.672927	0.611758
O43399	FALSE	Tumor protein D54 OS=Homo sapiens OX=9606 GN=TPD52L2 PE=1 SV=2	TPD52L2		6	2	62.1	87.5	272.3	312.5	11.7	9	73.9	106.4	125.1	144.6		18	4	498.2	452.8	32	19.7	2090.5	2135.7		5	2	84.5	75.3	34.7	33.5			119.7	162.9	41.3	45		0.028912	0.0385327	0.138462	0.141531	0.00290265	0.00242961	0.0469385	0.043851	0.0562121	0.0670967
O43402	FALSE	ER membrane protein complex subunit 8 OS=Homo sapiens OX=9606 GN=EMC8 PE=1 SV=1	EMC8																								2	2	139.8	121.7	101.2	106.6	9.6	7.3	175.5	109.7	121.5	126.9
O43447	FALSE	Peptidyl-prolyl cis-trans isomerase H OS=Homo sapiens OX=9606 GN=PPIH PE=1 SV=1	PPIH		12	3	69.2	90.2	224.3	282.5	23.2	25.9	108.3	132.6	175.4	157.2		13	2								14	3	150.6	140.1	115.6	101.8	18.8	12.9	277.9	343	67.6	72.2		0.0322175	0.0397217	0.114055	0.127944	0.00575568	0.00699187	0.0687881	0.0546489	0.0788137	0.0729433
O43488	FALSE	Aflatoxin B1 aldehyde reductase member 2 OS=Homo sapiens OX=9606 GN=AKR7A2 PE=1 SV=3	AKR7A2																								3	2	205.7	170.7	145.5	145.1	8.5	6.1	416.9	477.3	113.2	138
O43491	FALSE	Band 4.1-like protein 2 OS=Homo sapiens OX=9606 GN=EPB41L2 PE=1 SV=1	EPB41L2		14	8	902.6	997.5	1391.3	1565.2	85.2	86.6	926.2	1062.5	814.6	876		14	7	1301.5	1101.6	110.8	87.1	1432.5	1473.9		14	6	1226.9	1068.3	838.4	887.3	92.2	70.6	1982	2517	748.8	749.5		0.420224	0.439273	0.707465	0.708877	0.0211372	0.0233782	0.588288	0.437892	0.36603	0.406478
O43504	FALSE	Ragulator complex protein LAMTOR5 OS=Homo sapiens OX=9606 GN=LAMTOR5 PE=1 SV=1	LAMTOR5		4	2	131	154.1	291.6	381.4	19.6	15.4	333.7	410.7	236.9	214		5	2	701.4	639	77.8	70	1726.5	1910.2															0.0609898	0.0678615	0.148276	0.172736	0.00486256	0.00415733	0.211954	0.169263	0.106448	0.0992993
O43505	TRUE	Beta-1,4-glucuronyltransferase 1 OS=Homo sapiens OX=9606 GN=B4GAT1 PE=1 SV=1	B3GNT1; B4GAT1		16	6	2192.2	2159.7	1804.3	2239.7	66.6	75.7	2475.9	3358.3	1836.4	1662.6		33	4	2417.2	2172.4	121.6	84.4	3005.1	2621.9		8	2	674.2	623	770.1	710	33.8	22	1281.5	1367.1	1376.9	1452.2		1.02062	0.951075	0.917472	1.01436	0.0165228	0.0204357	1.5726	1.38407	0.825163	0.771472
O43567	TRUE	E3 ubiquitin-protein ligase RNF13 OS=Homo sapiens OX=9606 GN=RNF13 PE=1 SV=1	RNF13		3	2	208.2	265.2	80.2	94.2	7.1	4.2	309.2	410.9	67.7	77.5		7	2	300.5	253.5	22.6	14.2	655.3	706.7															0.0969319	0.116787	0.040781	0.042663	0.00176144	0.00113382	0.196392	0.169346	0.0304201	0.0359612
O43583	FALSE	Density-regulated protein OS=Homo sapiens OX=9606 GN=DENR PE=1 SV=2	DENR		3	2	77.5	99.7	215.1	251.8	15.8	12.3	191.3	247.4	125.4	125.7		10	3	1422.9	1295	218.6	199.3	2075.3	1725.2		4	3	211.2	172	161.7	165.1	21.7	16.3	311.6	379.8	111.3	126.7		0.0360818	0.0439052	0.109377	0.11404	0.00391982	0.00332047	0.121507	0.101962	0.0563469	0.0583268
O43592	FALSE	Exportin-T OS=Homo sapiens OX=9606 GN=XPOT PE=1 SV=2	XPOT		29	9	1897.1	2197	2250.8	2802.3	135.6	145.4	2863.2	4451.9	1851.1	1642.9		43	14	3840.7	3845.7	267.8	221.9	6035.1	5241.9		24	8	1472.4	1294.5	1501.4	1656.6	101.3	78.5	2207.4	2857.8	1153.8	1298.7		0.883235	0.9675	1.14451	1.26916	0.033641	0.0392517	1.8186	1.83478	0.831768	0.762331
O43615	FALSE	Mitochondrial import inner membrane translocase subunit TIM44 OS=Homo sapiens OX=9606 GN=TIMM44 PE=1 SV=2	TIMM44		49	20	1420.4	1561	3923.9	4738.8	146.2	143.7	3067.4	4306.9	3690.1	3286.5		100	20	5987.5	5631.9	443.3	355	26397.8	23926.7		61	17	3053.2	2616.8	1519.4	1437.8	93.7	55	6822.7	7147.4	3128.9	3288.5		0.661297	0.687423	1.99527	2.1462	0.0362707	0.0387928	1.9483	1.77502	1.6581	1.52499
O43617	FALSE	Trafficking protein particle complex subunit 3 OS=Homo sapiens OX=9606 GN=TRAPPC3 PE=1 SV=1	TRAPPC3		8	3	658.8	779.4	1673	1944.5	111	85.8	1306.6	1796.6	1097.6	1076.2		6	2	854.5	761	93.8	76.9	1746.6	1699.2		10	3	732.8	649.5	424.9	432	48.7	43.3	1457	1929.2	627	708.1		0.306718	0.343227	0.850707	0.880661	0.027538	0.0231623	0.829903	0.740439	0.493193	0.499374
O43657	TRUE	Tetraspanin-6 OS=Homo sapiens OX=9606 GN=TSPAN6 PE=1 SV=1	TSPAN6		27	7	5030	5041.9	2643.9	3239.4	74.3	91	3645.4	5275	2674.1	2390.8		34	5	5247.3	4923.4	469.2	399.2	17642.9	14825.5		11	3	256.9	214	564.2	546.4	19.7	17.2	319	394.3	3063.3	3131.4		2.34182	2.22032	1.3444	1.46712	0.0184331	0.024566	2.31542	2.174	1.20157	1.10937
O43660	FALSE	Pleiotropic regulator 1 OS=Homo sapiens OX=9606 GN=PLRG1 PE=1 SV=1	PLRG1		6	2	118.2	183	201.8	232.5	17.2	11.3	224	275.6	98	138.4		15	3	2114.6	1881.8	179	141.7	3915.3	3252.9		10	3	817.7	701	699	592.3	50.7	42.5	1489.9	1735	426.5	460.7		0.0550305	0.0805883	0.102614	0.105299	0.00426714	0.00305051	0.142276	0.113584	0.044035	0.0642198
O43663	FALSE	Protein regulator of cytokinesis 1 OS=Homo sapiens OX=9606 GN=PRC1 PE=1 SV=2	PRC1															3	2	343.6	325	37.7	33.9	438.8	379.8
O43670	FALSE	BUB3-interacting and GLEBS motif-containing protein ZNF207 OS=Homo sapiens OX=9606 GN=ZNF207 PE=1 SV=1	ZNF207															8	3	179.9	127.8	15.6	12.3	233.9	232
O43676	TRUE	NADH dehydrogenase [ubiquinone] 1 beta subcomplex subunit 3 OS=Homo sapiens OX=9606 GN=NDUFB3 PE=1 SV=3	NDUFB3		7	3	80.3	77.9	135.1	176.6	4.2	3.2	301.7	391.9	104.1	87.9		16	3	774.5	663.7	34.7	35.3	6566.3	4740.2		10	3	292.7	238.4	161.5	157.8	7	8.9	476.4	518.9	901.4	839.9		0.0373854	0.0343051	0.0686972	0.0799819	0.00104198	0.000863861	0.191629	0.161515	0.046776	0.040787
O43681	FALSE	ATPase ASNA1 OS=Homo sapiens OX=9606 GN=ASNA1 PE=1 SV=2	ASNA1		59	11	1986.7	2289.1	10453.6	12603.9	1039.3	1079.7	4090	5793.8	15447.4	17137.3		67	11	7011.2	6748.6	1066.3	1016.3	21451	18927.4		25	5	1872.8	1726.6	1902.5	2169.7	121.3	114.7	3378.1	2838.4	2744.4	2948.1		0.92495	1.00806	5.31557	5.70829	0.25784	0.291472	2.59782	2.38782	6.94109	7.95197
O43683	FALSE	Mitotic checkpoint serine/threonine-protein kinase BUB1 OS=Homo sapiens OX=9606 GN=BUB1 PE=1 SV=1	BUB1															5	3	330.5	302.8	24.8	17.8	381.7	352.2
O43684	FALSE	Mitotic checkpoint protein BUB3 OS=Homo sapiens OX=9606 GN=BUB3 PE=1 SV=1	BUB3		10	4	548.7	514.6	693.7	924.7	73.9	74.8	575.6	779.4	632.5	533.2		11	4	1262.3	1114.6	119.2	105.5	1783.4	1416.4		13	5	698.6	613	654.3	633	67.5	63.1	1346.1	1612.4	436.2	490.2		0.255459	0.226616	0.352741	0.418795	0.0183338	0.0201927	0.3656	0.321217	0.284206	0.247413
O43707	FALSE	Alpha-actinin-4 OS=Homo sapiens OX=9606 GN=ACTN4 PE=1 SV=2	ACTN4		97	17	7682.9	7855	4440.2	5329.7	283.8	243.3	6908.8	9684.8	3862	3517.8		163	24	25245.5	24533.8	1722.1	1405.7	33527.4	29512.2		97	17	7447.3	7197.9	8507.8	8450.1	517.9	421.3	10648.6	12426.9	6273.5	7134.9		3.57694	3.45913	2.25781	2.41381	0.0704079	0.0656804	4.38821	3.99143	1.73534	1.63231
O43719	FALSE	HIV Tat-specific factor 1 OS=Homo sapiens OX=9606 GN=HTATSF1 PE=1 SV=1	HTATSF1		10	4	369.5	413.9	229.7	298.6	17.7	19.2	321	411.2	115.6	116.1		45	13	3867.3	3508.1	310	237.9	4366.2	4090		14	6	438.1	386.3	422.6	404.4	29.7	28.7	651	726.7	316.6	343.5		0.172028	0.182271	0.116801	0.135236	0.00439119	0.00518317	0.203887	0.169469	0.0519434	0.0538722
O43747	FALSE	AP-1 complex subunit gamma-1 OS=Homo sapiens OX=9606 GN=AP1G1 PE=1 SV=5	AP1G1		7	4	166.8	214.1	395.2	473.2	24.7	24	156.2	248.3	248.5	259.6		6	3	456.6	379.1	30.7	33.5	524.7	477															0.0776572	0.094284	0.200956	0.214312	0.00612782	0.00647896	0.0992124	0.102333	0.11166	0.120458
O43759-2	TRUE	Isoform 1B of Synaptogyrin-1 OS=Homo sapiens OX=9606 GN=SYNGR1	SYNGR1		12	3	231.9	217.1	435.8	498.6	18.6	14.4	395.9	539.4	382.7	258.2		17	4	362.2	349.8	26.8	27	1746.7	1384.1		8	2	52.4	46.8	78.3	72.2	8.7	4.8	96.8	96.9	261.4	277.7		0.107966	0.0956051	0.221601	0.225815	0.00461447	0.00388737	0.251461	0.222305	0.171961	0.119809
O43760	TRUE	Synaptogyrin-2 OS=Homo sapiens OX=9606 GN=SYNGR2 PE=1 SV=1	SYNGR2		7	2	45.2	33.8	65.7	77.5	3.2	3.5	59.7	76.7	83.8	35.4		15	2	1093	959.8	71.8	62.8	5215.9	4183.5															0.0210438	0.0148846	0.0334079	0.0350996	0.000793887	0.000944848	0.0379192	0.0316106	0.0376545	0.0164262
O43765	FALSE	Small glutamine-rich tetratricopeptide repeat-containing protein alpha OS=Homo sapiens OX=9606 GN=SGTA PE=1 SV=1	SGTA		39	12	1333.3	1434.5	6988.3	8247.1	276	305.2	1803	2363.8	3807.5	3732.6		43	10	5220.8	4842.6	353.9	273.3	10700	9676		16	5	1536.1	1273.3	911.1	970.1	64.8	48.6	2389.4	3163.1	1190.1	1374.7		0.620746	0.631716	3.55349	3.7351	0.0684728	0.0823907	1.1452	0.9742	1.71085	1.73198
O43772	TRUE	Mitochondrial carnitine/acylcarnitine carrier protein OS=Homo sapiens OX=9606 GN=SLC25A20 PE=1 SV=1	SLC25A20		40	13	5620.8	5302.7	1573.3	1832.9	42.8	61.3	1359.6	1743.8	2051.5	1526.1		69	12	8618.3	8403.5	511.1	387.5	11001.8	9011.4		14	6	414.7	363.8	543.2	519.2	23	20.7	579	616.5	690.9	722.6		2.61688	2.33517	0.80001	0.830118	0.0106182	0.0165483	0.863567	0.718678	0.921815	0.708134
O43776	FALSE	Asparagine--tRNA ligase, cytoplasmic OS=Homo sapiens OX=9606 GN=NARS PE=1 SV=1	NARS		16	9	560.2	616.1	832.2	991.9	57.5	48.3	627	857.7	739.3	605.2		25	9	2565.5	2277	216.8	192	3531.1	3379.9		34	11	2043.9	1845.2	1446.3	1502	161.7	131	3164.8	3994.9	957.9	1089.7		0.260813	0.271314	0.423167	0.44923	0.0142652	0.0130389	0.398247	0.353487	0.332195	0.280822
O43805	FALSE	Sjoegren syndrome nuclear autoantigen 1 OS=Homo sapiens OX=9606 GN=SSNA1 PE=1 SV=2	SSNA1		7	4	1988	2287.1	332.4	464.3	27.4	25.2	1888.8	2336.8	373.1	337.4		9	4	1360.7	1354.1	82.3	77.2	2872.5	2312.6															0.925555	1.00718	0.169023	0.210281	0.00679766	0.0068029	1.1997	0.963073	0.167648	0.156559
O43808	TRUE	Peroxisomal membrane protein PMP34 OS=Homo sapiens OX=9606 GN=SLC25A17 PE=1 SV=1	SLC25A17		21	4	254	273	2052.6	2330.5	96.2	87.9	431.2	566	1461.4	1321.6		19	3	996.1	927.2	79.7	69.3	3848.8	3911		8	2	321.8	271.4	135	124.7	7.5	3.2	390.3	381.6	332.1	420.3		0.118255	0.120222	1.04373	1.05548	0.0238662	0.0237292	0.273882	0.233267	0.656661	0.613243
O43809	FALSE	Cleavage and polyadenylation specificity factor subunit 5 OS=Homo sapiens OX=9606 GN=NUDT21 PE=1 SV=1	NUDT21		5	3	212.2	265.9	182.1	215.8	24.6	14.4	243.9	320.1	133.1	127.8		15	5	447.7	341.9	37.9	36.6	645.1	560.1		8	3	613	549.8	621.4	525	52.1	43.6	814.4	974.2	358.6	419.3		0.0987942	0.117095	0.0925964	0.0977355	0.00610301	0.00388737	0.154916	0.131924	0.0598068	0.0593012
O43813	FALSE	LanC-like protein 1 OS=Homo sapiens OX=9606 GN=LANCL1 PE=1 SV=1	LANCL1		6	3	228.8	260.4	340.8	365.8	16	14.1	743.1	992.4	282.4	242.4		29	6	1695.7	1436.2	109	70.7	8658.3	7701.3															0.106523	0.114673	0.173294	0.16567	0.00396944	0.00380639	0.471989	0.409001	0.126893	0.112477
O43815	FALSE	Striatin OS=Homo sapiens OX=9606 GN=STRN PE=1 SV=4	STRN		2	2	65.9	89.8	79	96	8.4	9.9	81	106	43.1	58.9																								0.0306811	0.0395455	0.0401709	0.0434783	0.00208395	0.00267257	0.0514482	0.0436861	0.0193664	0.0273305
O43818	FALSE	U3 small nucleolar RNA-interacting protein 2 OS=Homo sapiens OX=9606 GN=RRP9 PE=1 SV=1	RRP9																								13	5	1366.1	1408.7	932.4	857.2	71.3	54.7	1490.2	1797.9	508.2	552
O43819	TRUE	Protein SCO2 homolog, mitochondrial OS=Homo sapiens OX=9606 GN=SCO2 PE=1 SV=3	SCO2		13	5	408.1	402.4	643.7	744.1	28.5	27.6	994.1	1164	620.1	451.2		51	6	2200.8	1863.6	173	135.2	13467.7	11054		12	5	268.3	219.9	130.6	125.5	10.2	6.5	528.1	508.6	337.9	367.1		0.19	0.177206	0.327316	0.337002	0.00707056	0.0074508	0.631415	0.479723	0.278634	0.209364
O43823	FALSE	A-kinase anchor protein 8 OS=Homo sapiens OX=9606 GN=AKAP8 PE=1 SV=1	AKAP8		4	2	503.9	593.8	448.9	543.4	24.5	17.1	1128.3	1532.6	213.9	233.5		19	7	2495.4	2275.6	184	136.4	3589.2	3518.8															0.234601	0.261494	0.228262	0.246105	0.0060782	0.00461626	0.716654	0.631635	0.0961132	0.108348
O43826	TRUE	Glucose-6-phosphate exchanger SLC37A4 OS=Homo sapiens OX=9606 GN=SLC37A4 PE=1 SV=1	SLC37A4		3	2	28.8	30.8	94.3	114.6		3.5	74.1	98.8	80	67.3		5	3	154.5	135.9	22.9	8.7	625.4	561.9															0.0134084	0.0135635	0.0479508	0.0519022		0.000944848	0.0470655	0.0407188	0.035947	0.0312282
O43837	FALSE	Isocitrate dehydrogenase [NAD] subunit beta, mitochondrial OS=Homo sapiens OX=9606 GN=IDH3B PE=1 SV=2	IDH3B															8	4	369.2	276.9	30.1	21.5	588.1	597.9		11	4	503.3	440.5	235.2	202.5	16.7	14.9	873.7	941.3	194.1	209.4
O43847	FALSE	Nardilysin OS=Homo sapiens OX=9606 GN=NRDC PE=1 SV=3			27	11	2139.7	2320	716.3	925.6	53.1	46	1405.4	2007.5	582.7	545.3		48	13	5639.5	5577.8	370.3	306.4	4910.3	4140.8		5	4	289.7	262.1	288.1	298.2	13.1	9.6	354.4	447.4	281	317.6		0.996182	1.02167	0.364233	0.419203	0.0131736	0.012418	0.892658	0.827357	0.261829	0.253028
O43852	FALSE	Calumenin OS=Homo sapiens OX=9606 GN=CALU PE=1 SV=2	CALU		40	14	3999.8	4393.1	1780.3	2471.6	207.4	199.6	3192.4	4788.6	1684.4	1621.1		37	3	4188.7	4231.2	364.2	302.8	8563.8	6887.2		30	10	2500.1	2023.1	2948.6	3123.5	149.2	129.4	4689	4910.5	2315.5	2551		1.86219	1.9346	0.905268	1.11938	0.0514538	0.0538833	2.02769	1.97354	0.756864	0.752216
O43865	FALSE	S-adenosylhomocysteine hydrolase-like protein 1 OS=Homo sapiens OX=9606 GN=AHCYL1 PE=1 SV=2	AHCYL1		22	8	3019.8	3493.1	1648.4	1933.3	103.3	99.7	4934	6588.4	1121.2	1170.8		34	8	4660.9	4081.2	322.3	288.2	7966.4	7138.9		11	4	804.3	686.4	829.2	927.9	58.6	52.6	1328.8	1627.7	589.7	704.9		1.40593	1.53827	0.838198	0.875589	0.0256277	0.0269147	3.13389	2.7153	0.503797	0.543269
O43924	FALSE	Retinal rod rhodopsin-sensitive cGMP 3',5'-cyclic phosphodiesterase subunit delta OS=Homo sapiens OX=9606 GN=PDE6D PE=1 SV=1	PDE6D															12	3	379.6	324.4	37.9	30.7	1872.1	1580.1
O43929	FALSE	Origin recognition complex subunit 4 OS=Homo sapiens OX=9606 GN=ORC4 PE=1 SV=2	ORC4		6	3	177.6	205.6	386.9	473.9	28.5	26.3	251.2	399.8	288.4	297.1		7	3	754.3	697.2	77.6	75.8	915.9	815.3		5	2	72.1	69.7	66.7	66.2	3.5	2.3	118.2	127.2	51.7	68.5		0.0826854	0.0905408	0.196735	0.214629	0.00707056	0.00709986	0.159553	0.164771	0.129589	0.137859
O60216	FALSE	Double-strand-break repair protein rad21 homolog OS=Homo sapiens OX=9606 GN=RAD21 PE=1 SV=2	RAD21																								5	4	34.3	35.5	34.2	30.3	2.3	2.3	54.6	69.4	31.4	32.6
O60256	FALSE	Phosphoribosyl pyrophosphate synthase-associated protein 2 OS=Homo sapiens OX=9606 GN=PRPSAP2 PE=1 SV=1	PRPSAP2		16	6	542	632.5	1172.8	1413.3	72.4	61.3	674.1	908.6	855.3	763.3		13	4	787.4	705.5	65.4	55	1287.8	1038.6		15	6	1089	975.8	565	583.5	46.8	43.2	1356.3	1674.2	451.2	494.6		0.252339	0.278536	0.596359	0.640082	0.0179617	0.0165483	0.428163	0.374464	0.384318	0.354183
O60264	FALSE	SWI/SNF-related matrix-associated actin-dependent regulator of chromatin subfamily A member 5 OS=Homo sapiens OX=9606 GN=SMARCA5 PE=1 SV=1	SMARCA5		7	4	525.8	520.3	477.7	582.1	33.3	31	508.4	675.9	477.6	383.4		20	8	1616.7	1495.9	146.5	126	2363.9	2052.6		23	12	763.3	731.9	767.7	700.2	45.1	36.3	1289	1490.4	471	524.2		0.244797	0.229126	0.242907	0.263632	0.00826139	0.00836865	0.322917	0.278561	0.214603	0.177904
O60271	FALSE	C-Jun-amino-terminal kinase-interacting protein 4 OS=Homo sapiens OX=9606 GN=SPAG9 PE=1 SV=4	SPAG9		6	2	172.2	205.2	162.9	190.3	12.2	12.2	185.9	274	87.8	113.3		18	7	1911.9	1775.5	161.2	139.2	2986.5	2796															0.0801713	0.0903646	0.0828333	0.0861866	0.00302669	0.00329347	0.118077	0.112924	0.0394518	0.052573
O60313	TRUE	Dynamin-like 120 kDa protein, mitochondrial OS=Homo sapiens OX=9606 GN=OPA1 PE=1 SV=3	OPA1																								28	12	1695.8	1658.7	1481.5	1364.5	125.7	100.9	2484.8	2818.9	2106.2	2207.2
O60313-2	TRUE	Isoform 2 of Dynamin-like 120 kDa protein, mitochondrial OS=Homo sapiens OX=9606 GN=OPA1	OPA1		32	17	1224.7	1692.4	2497.4	2988.5	60.7	101.5	1951.3	2716.8	1748.6	2112.3		103	35	7167.3	6844.6	499.8	427.7	22827.4	21171															0.570185	0.745288	1.26991	1.35349	0.015059	0.0274006	1.23939	1.11968	0.785711	0.98014
O60343	FALSE	TBC1 domain family member 4 OS=Homo sapiens OX=9606 GN=TBC1D4 PE=1 SV=2	TBC1D4		8	4	280.3	363.5	385.2	485.5	27.6	23.5	321.8	524.6	182.5	198.2		10	8	685.9	675.3	49.3	48.1	978.5	846.8															0.1305	0.160076	0.195871	0.219882	0.00684728	0.00634398	0.204395	0.216205	0.082004	0.0919679
O60427	TRUE	Fatty acid desaturase 1 OS=Homo sapiens OX=9606 GN=FADS1 PE=1 SV=3	FADS1															3	2	93.4	96.9	9.6	9.7	306	247.2
O60443	FALSE	Gasdermin-E OS=Homo sapiens OX=9606 GN=GSDME PE=1 SV=2	DFNA5; GSDME															3	2	47.5	47.6			163.3	159.6
O60488	TRUE	Long-chain-fatty-acid--CoA ligase 4 OS=Homo sapiens OX=9606 GN=ACSL4 PE=1 SV=2	ACSL4		22	7	197.4	207	954.8	1149.2	46.4	38.2	368.8	509.1	559.6	543.1		18	7	504.8	472.2	51.6	38.5	1084.3	923.2		12	2												0.0919037	0.0911573	0.485508	0.520471	0.0115114	0.0103123	0.234248	0.209817	0.251449	0.252007
O60493	FALSE	Sorting nexin-3 OS=Homo sapiens OX=9606 GN=SNX3 PE=1 SV=3	SNX3		4	2	159.3	163.3	476.9	637.6	39.3	38.2	188.8	267	364.2	288.4											4	2	227.7	191.1	130.8	112.6	11.4	11.1	516.5	498.6	136.6	144.6		0.0741655	0.071913	0.2425	0.288768	0.00974993	0.0103123	0.119919	0.11004	0.163649	0.133822
O60499	TRUE	Syntaxin-10 OS=Homo sapiens OX=9606 GN=STX10 PE=1 SV=1	STX10		5	3	13.3	10.7	17	20.9			6.6	13	10.8	12.3		7	4	294.1	277.2	21.9	17	911.6	823.3															0.00619209	0.004712	0.00864436	0.00946558			0.00419207	0.00535773	0.00485284	0.00570739
O60502	FALSE	Protein O-GlcNAcase OS=Homo sapiens OX=9606 GN=OGA PE=1 SV=2	MGEA5		24	9	1253.7	1486.9	531.2	689	37.9	32	1450.8	2194.2	439.7	417.9		60	14	3536	3343.8	230.9	188.4	8984.4	7765.3		8	3	155.7	156.1	206.4	217.5	15.3	6.1	258.1	313.8	147.6	193.4		0.583686	0.654791	0.270111	0.312047	0.0094026	0.00863861	0.921494	0.904303	0.197574	0.193912
O60506-3	FALSE	Isoform 3 of Heterogeneous nuclear ribonucleoprotein Q OS=Homo sapiens OX=9606 GN=SYNCRIP	SYNCRIP		185	22	21088.8	23580.1	9858.6	12761.5	680.7	698.5	38088.8	56360.3	9024.4	8209.5											149	18	12349.7	11925.2	10123.1	10961	676.8	607.6	22039.6	22876.5	6522.7	7431.2		9.81833	10.384	5.01302	5.77966	0.168875	0.188565	24.1926	23.228	4.055	3.80934
O60518	FALSE	Ran-binding protein 6 OS=Homo sapiens OX=9606 GN=RANBP6 PE=1 SV=2	RANBP6		17	2	69.2	104.8	61	71	3.8	5.4	75.9	109.2	30.9	40.7		12	3	942	937	62.7	59.7	924.6	887.5															0.0322175	0.0461511	0.031018	0.0321558	0.000942741	0.00145777	0.0482088	0.0450049	0.0138845	0.0188854
O60566	FALSE	Mitotic checkpoint serine/threonine-protein kinase BUB1 beta OS=Homo sapiens OX=9606 GN=BUB1B PE=1 SV=3	BUB1B		5	2	263.2	387.5	563.2	810.9	40.2	46.6	286.9	463.4	199	249.8																								0.122538	0.170645	0.286383	0.367255	0.00997321	0.01258	0.182228	0.190983	0.0894181	0.115911
O60610	FALSE	Protein diaphanous homolog 1 OS=Homo sapiens OX=9606 GN=DIAPH1 PE=1 SV=2	DIAPH1		4	3												3	2	236.3	212.5	17	7.8	304.1	296.5		5	3	224.8	201.7	176.4	174.8	14.5	12.6	391.4	487.6	140.6	150.3
O60637	TRUE	Tetraspanin-3 OS=Homo sapiens OX=9606 GN=TSPAN3 PE=2 SV=1	TSPAN3		22	4	1748.7	1916.5	1343.3	1615.9	29.8	42.5	2214.6	3214	1408.9	1424.3		18	5	1542.5	1429.3	94.9	73.5	4421.8	3798.6		16	3	403	375.3	988.1	877.4	39.8	29.9	534.4	562.2	3164.9	3286		0.814144	0.843976	0.683057	0.731839	0.00739307	0.0114732	1.40663	1.3246	0.633071	0.660897
O60664	FALSE	Perilipin-3 OS=Homo sapiens OX=9606 GN=PLIN3 PE=1 SV=3	PLIN3		14	7	385.3	439.8	1919.3	2558.5	83.2	98.4	430.7	610.8	2153.9	1699.5		14	6	1492.6	1395.9	116.4	93.9	2646.3	2338.5		14	5	956.9	914.3	624	639.9	50.6	36.5	1616.1	2025.4	512.7	604.6		0.179385	0.193676	0.975948	1.15874	0.0206411	0.0265637	0.273565	0.251731	0.967827	0.788594
O60678	FALSE	Protein arginine N-methyltransferase 3 OS=Homo sapiens OX=9606 GN=PRMT3 PE=1 SV=4	PRMT3		14	6	577.9	741.2	913.9	1287	65.9	62.8	754.7	1090.1	413.6	505.1		30	8	3733.6	3391.8	306.2	253.1	5524.1	5069.1															0.269053	0.326405	0.464711	0.58288	0.0163491	0.0169533	0.479357	0.449266	0.185846	0.234374
O60716	FALSE	Catenin delta-1 OS=Homo sapiens OX=9606 GN=CTNND1 PE=1 SV=1	CTNND1		10	4	393.9	517.3	516.8	579.8	41.1	34.9	541.2	820.8	266.9	325.9		17	6	457.9	415.7	41.6	37	674.9	653		6	3	264	218.3	306.7	271.2	23.9	18.7	520.3	648.5	234.3	260.2		0.183388	0.227805	0.262789	0.262591	0.0101965	0.00942148	0.34375	0.338279	0.119928	0.151223
O60725	TRUE	Protein-S-isoprenylcysteine O-methyltransferase OS=Homo sapiens OX=9606 GN=ICMT PE=1 SV=1	ICMT		20	5	638	688.8	3035.3	3687.2	102.1	122.7	1647.6	2241.4	2384.7	2420.2		26	4	787.5	724.2	51.5	30.3	2399.8	2191.6		8	3	134.5	115.3	72.4	58.1	2.8		157	153.8	194	232.1		0.297034	0.303329	1.54343	1.66993	0.02533	0.0331237	1.04649	0.923755	1.07153	1.12301
O60749	FALSE	Sorting nexin-2 OS=Homo sapiens OX=9606 GN=SNX2 PE=1 SV=2	SNX2		34	10	2231.6	2503	3167	3673.8	138.9	144.7	4155	5746.7	3752	3769.8		49	11	4363.4	4159.1	288.5	238.6	9044.4	7667.6		15	4	749.4	739.7	827.7	950.6	104.3	45.4	1143.1	1331.2	883.8	1036.8		1.03897	1.10225	1.61039	1.66386	0.0344597	0.0390627	2.6391	2.36841	1.68591	1.74925
O60762	FALSE	Dolichol-phosphate mannosyltransferase subunit 1 OS=Homo sapiens OX=9606 GN=DPM1 PE=1 SV=1	DPM1		5	4	105.6	111	360.4	447.5	17.9	12	255.3	291.3	257.6	201.2		13	6	633	521.7	59.2	52.4	2320.4	2053		6	3	337.2	295.6	177.1	153.4	10.3	7.7	668.3	776.5	243.4	288.2		0.0491643	0.0488815	0.18326	0.202672	0.00444081	0.00323948	0.162157	0.120054	0.115749	0.0933599
O60763	FALSE	General vesicular transport factor p115 OS=Homo sapiens OX=9606 GN=USO1 PE=1 SV=2	USO1		17	10	532.4	663.6	734.1	825.8	43.9	55.3	701.9	964.8	586.5	649.3		18	11	1820.4	1633.1	118.4	108.1	2290.4	2091.4		4	2	62.4	65.9	58.7	62.7	2.2	2.7	110.3	135.8	48.9	55.1		0.24787	0.292232	0.373284	0.374004	0.0108911	0.0149286	0.445821	0.397626	0.263536	0.301285
O60784	FALSE	Target of Myb protein 1 OS=Homo sapiens OX=9606 GN=TOM1 PE=1 SV=2	TOM1		3	2	120.1	166.5	156.4	173.5	9.4	5.6	197.2	276.9	91.7	120.4		7	2	111.5	98	7.9	4.2	212.6	241															0.0559151	0.0733222	0.0795281	0.0785779	0.00233204	0.00151176	0.125254	0.11412	0.0412042	0.0558675
O60826	FALSE	Coiled-coil domain-containing protein 22 OS=Homo sapiens OX=9606 GN=CCDC22 PE=1 SV=1	CCDC22		8	3	195.2	252.2	241.3	296.5	16.4	14.1	252.9	381.5	177.6	194		15	7	1208.6	1121.9	89.2	59.4	1019.7	940.8															0.0908795	0.111062	0.122699	0.134284	0.00406867	0.00380639	0.160633	0.157229	0.0798023	0.090019
O60830	TRUE	Mitochondrial import inner membrane translocase subunit Tim17-B OS=Homo sapiens OX=9606 GN=TIMM17B PE=1 SV=1	TIMM17B		56	6	2669.5	3046.9	2425.9	2869.7	96.8	90.6	4665.5	6695.6	1929.4	1802		142	10	6102.7	5643.9	322.9	280.9	27266.1	21687.6		64	5	799	649.3	1196	1214.9	41.4	30.4	1288.5	1196.1	7087.5	6966.9		1.24284	1.34177	1.23355	1.29968	0.0240151	0.0244581	2.96335	2.75948	0.866951	0.836156
O60831	TRUE	PRA1 family protein 2 OS=Homo sapiens OX=9606 GN=PRAF2 PE=1 SV=1	PRAF2		22	3	454.6	526.2	4296	4963.8	167.8	150.5	1586.4	2115.8	3533.9	3400.3		17	3	1704.7	1498.9	124.4	100.5	8181.7	7852.7		18	3	1581.5	1517.2	1117	1055.4	89.9	66.7	2092.4	1872.4	3271	3888.9		0.211649	0.231725	2.18448	2.2481	0.0416295	0.0406285	1.00762	0.871991	1.58791	1.57779
O60832	FALSE	H/ACA ribonucleoprotein complex subunit DKC1 OS=Homo sapiens OX=9606 GN=DKC1 PE=1 SV=3	DKC1															3	2	241.7	188	28	18.6	262	314.6		9	4	879.1	613.8	514.7	572.2	108.5	87.9	1213	1429.4	449.8	377.6
O60841	FALSE	Eukaryotic translation initiation factor 5B OS=Homo sapiens OX=9606 GN=EIF5B PE=1 SV=4	EIF5B															54	16	5792	5364.8	468.8	393.5	6224.7	5793.1		17	7	1622.6	1347.9	1071.5	1159.5	139.1	106.1	1804.3	2248.4	1024.2	1114.7
O60884	FALSE	DnaJ homolog subfamily A member 2 OS=Homo sapiens OX=9606 GN=DNAJA2 PE=1 SV=1	DNAJA2		21	8	1221.2	1382	2845.8	3762.3	77.7	116.6	2027.5	3028.3	1727	1639		23	7	5249.2	5291.5	378.6	323.3	11934.3	10230.8		12	3	1286.6	1147.8	1155	1264.2	85.5	65.7	2219.1	2894.5	1701.8	1915.9		0.568555	0.608596	1.44707	1.70394	0.0192766	0.0314769	1.28779	1.24806	0.776005	0.760522
O60888	FALSE	Protein CutA OS=Homo sapiens OX=9606 GN=CUTA PE=1 SV=2	CUTA															51	5	9803.8	8497.9	736.6	556.8	30510.3	31201.7
O60925	FALSE	Prefoldin subunit 1 OS=Homo sapiens OX=9606 GN=PFDN1 PE=1 SV=2	PFDN1		3	2	411.9	462.4	168	210	8.9	12.4	322.3	351.9	185.1	123.5		3	2																					0.191769	0.203629	0.0854266	0.0951087	0.002208	0.00334746	0.204713	0.14503	0.0831723	0.0573059
O60942	FALSE	mRNA-capping enzyme OS=Homo sapiens OX=9606 GN=RNGTT PE=1 SV=1	RNGTT		4	4	69.3	89.5	58.6	73.3	38.2	30.3	275.2	375.4	59.8	57.9																								0.0322641	0.0394134	0.0297976	0.0331975	0.00947703	0.00817968	0.174797	0.154715	0.0268704	0.0268665
O75027	TRUE	ATP-binding cassette sub-family B member 7, mitochondrial OS=Homo sapiens OX=9606 GN=ABCB7 PE=1 SV=2	ABCB7		25	11	710.1	797.4	2595	3377.2	145.4	127.9	882.6	1164.9	1704.1	1737.8		34	14	1217	1071.8	87.8	65.2	4779.4	4338.4		12	5	251.1	206.1	178.9	170.2	2.6	3	356.9	358.9	300.3	335.2		0.330602	0.351154	1.31954	1.52953	0.0360722	0.0345274	0.560595	0.480094	0.765716	0.806366
O75083	FALSE	WD repeat-containing protein 1 OS=Homo sapiens OX=9606 GN=WDR1 PE=1 SV=4	WDR1		7	4	149.2	163.4	238.2	330.8	20.2	16.5	192.3	243.7	205.5	198.1		10	4	1515.8	1181.3	228.6	224.9	1853.5	2251.8		12	4	915.2	840.1	535.8	489.8	92.6	59.4	1723.8	2176.1	575.7	635		0.0694632	0.071957	0.121123	0.149819	0.00501141	0.00445428	0.122142	0.100437	0.0923388	0.0919215
O75131	FALSE	Copine-3 OS=Homo sapiens OX=9606 GN=CPNE3 PE=1 SV=1	CPNE3		21	8	1275.1	1442.9	1409.3	1719.2	138.8	132.3	1278.9	1707.7	1151.9	1047.1		35	10	3375.2	3233.8	242.4	211.4	4216.2	3527.5		18	6	607.1	547.5	617.1	580.8	48.1	40.2	905.5	1061.4	469.8	526.7		0.59365	0.635415	0.716618	0.778623	0.0344349	0.0357152	0.812309	0.7038	0.517592	0.485871
O75150	FALSE	E3 ubiquitin-protein ligase BRE1B OS=Homo sapiens OX=9606 GN=RNF40 PE=1 SV=5	RNF40		8	3	149.1	168.7	100.6	140	4.8	6.7	243.3	329.3	64.1	64.9		12	5	778.5	730.7	54.7	46.4	807.3	787.3		4	2												0.0694166	0.074291	0.0511543	0.0634058	0.00119083	0.00180871	0.154535	0.135715	0.0288025	0.0301146
O75152	FALSE	Zinc finger CCCH domain-containing protein 11A OS=Homo sapiens OX=9606 GN=ZC3H11A PE=1 SV=3	ZC3H11A															2	2	327.8	288.8	29.6	18.1	304.5	270.7
O75153	FALSE	Clustered mitochondria protein homolog OS=Homo sapiens OX=9606 GN=CLUH PE=1 SV=2	CLUH; KIAA0664		45	18	3285.4	3702	836.4	1035.5	54.2	54.7	3200.7	4545.7	761.5	711.1		164	37	15581.2	15600.5	1103	914.1	21075.9	18202.7		4	2	29.8	27.2	31	30.4			37	44.6	35.4	45		1.52959	1.63026	0.425303	0.468976	0.0134465	0.0147666	2.03296	1.87343	0.34217	0.329961
O75208	FALSE	Ubiquinone biosynthesis protein COQ9, mitochondrial OS=Homo sapiens OX=9606 GN=COQ9 PE=1 SV=1	COQ9		10	5	126.7	126.6	279.4	337.8	19.3	21	149.2	201.4	386.3	328.6		11	6	623.1	557.5	70.3	67.8	3101.6	2435.8															0.0589878	0.0557513	0.142073	0.152989	0.00478813	0.00566909	0.0947663	0.0830036	0.173579	0.152476
O75223	FALSE	Gamma-glutamylcyclotransferase OS=Homo sapiens OX=9606 GN=GGCT PE=1 SV=1	GGCT		2	2	146.3	195.1	444.2	569	31.1	22.1	167.1	161	197.5	196.6											4	2	746.6	643.8	425.8	473.6	78.5	29.3	823.4	1074.3	312.9	345.2		0.068113	0.0859169	0.225872	0.257699	0.00771559	0.00596604	0.106136	0.0663534	0.0887441	0.0912255
O75251	FALSE	NADH dehydrogenase [ubiquinone] iron-sulfur protein 7, mitochondrial OS=Homo sapiens OX=9606 GN=NDUFS7 PE=1 SV=3	NDUFS7		11	4	450.2	487.6	1368.2	1654.5	115.7	111.4	1066.2	1289.6	1159.4	1033.6		15	4	1256.9	1083.9	148.3	133.3	4452	3572.8		13	4	1251.1	1073.7	557.2	546.7	68.2	58.9	1705.1	1615.3	1212.3	1293.6		0.2096	0.214726	0.695718	0.749321	0.028704	0.0300732	0.67721	0.531487	0.520962	0.479607
O75298	TRUE	Reticulon-2 OS=Homo sapiens OX=9606 GN=RTN2 PE=1 SV=1	RTN2		9	2	123.9	144.9	969.3	1031.9	42.5	43.6	303.9	358.6	1356.4	999.8		12	2	734.7	649.3	42	42.4	4403.6	3386.3															0.0576842	0.0638101	0.492881	0.467346	0.0105438	0.0117701	0.193026	0.147791	0.609481	0.463923
O75306	FALSE	NADH dehydrogenase [ubiquinone] iron-sulfur protein 2, mitochondrial OS=Homo sapiens OX=9606 GN=NDUFS2 PE=1 SV=2	NDUFS2		12	5	621.1	858.4	1510.9	1853	71.1	65.4	1547.1	2107.7	1021.6	1200.1		11	4	1516	1291.1	112.4	83.9	3780.6	3747.9		24	7	2492.5	2218.5	1872.4	1665.7	98.5	77.3	4805.6	5512.2	2468.2	2709.2		0.289166	0.378017	0.76828	0.839221	0.0176392	0.0176552	0.98266	0.868653	0.459043	0.556865
O75312	FALSE	Zinc finger protein ZPR1 OS=Homo sapiens OX=9606 GN=ZPR1 PE=1 SV=1	ZNF259; ZPR1		4	3	214	206.4	51.5	77	4.3	11.7	140.6	220	61.9	60.4		18	5	2878.5	2783.2	240.7	188.3	3151	2885.3															0.0996322	0.0908931	0.0261873	0.0348732	0.00106679	0.00315849	0.0893039	0.0906693	0.027814	0.0280265
O75330	FALSE	Hyaluronan mediated motility receptor OS=Homo sapiens OX=9606 GN=HMMR PE=1 SV=2	HMMR															2	2	183.9	172.4	12.8	8.4	231	219.9
O75340	FALSE	Programmed cell death protein 6 OS=Homo sapiens OX=9606 GN=PDCD6 PE=1 SV=1	PDCD6		6	3	119.9	177.3	346.2	409.8	5.3	13.5	325.7	424.4	168	212.3											3	2												0.055822	0.0780782	0.17604	0.185598	0.00131488	0.00364441	0.206872	0.174909	0.0754887	0.0985105
O75347	FALSE	Tubulin-specific chaperone A OS=Homo sapiens OX=9606 GN=TBCA PE=1 SV=3	TBCA		14	6	657.1	758.5	1733.4	2092.3	128.6	126.4	656.6	775.7	1307.9	1056		26	8	3578.6	3195.5	403.3	352.1	6282	5556		12	4	2034.1	1655.4	437.9	542.8	110.4	75.5	2121.7	2809.2	585.3	596.5		0.305927	0.334023	0.88142	0.9476	0.0319043	0.0341225	0.417048	0.319692	0.587688	0.49
O75348	FALSE	V-type proton ATPase subunit G 1 OS=Homo sapiens OX=9606 GN=ATP6V1G1 PE=1 SV=3	ATP6V1G1															5	2	470	391.1	30.4	20	939.8	805.1
O75352	TRUE	Mannose-P-dolichol utilization defect 1 protein OS=Homo sapiens OX=9606 GN=MPDU1 PE=1 SV=2	MPDU1		12	2	101.8	122.5	1145.9	1326.3	34.7	52.2	206.5	291.2	836	733.1		17	2	97.8	95.1	7.3	2.5	748.7	650.3															0.0473951	0.0539457	0.582681	0.600679	0.00860871	0.0140917	0.131161	0.120013	0.375646	0.34017
O75367	FALSE	Core histone macro-H2A.1 OS=Homo sapiens OX=9606 GN=H2AFY PE=1 SV=4	H2AFY		27	7	1728.4	2230.1	2608.8	3093	185.1	165.1	1445.4	1928.2	2068.5	2352.4		58	9	8320.8	7523.3	1794.5	1478.5	6899.3	6030.7		47	10	3021.5	2736.7	2150.6	1723	145.5	121.4	5380.8	5966.5	1183.7	1251.6		0.804693	0.982077	1.32655	1.40082	0.0459214	0.0445698	0.918064	0.794675	0.929454	1.09155
O75369	FALSE	Filamin-B OS=Homo sapiens OX=9606 GN=FLNB PE=1 SV=2	FLNB		15	5	349.3	363.7	325.9	413.6	41.8	37.2	557.2	767.5	256.1	269.6		35	17	2017.8	1861.9	184	162.2	3792.1	3393.1		20	8	376.5	340.7	407.1	372.8	33.5	19.9	580.6	652.1	249	280.9		0.162624	0.160164	0.165717	0.187319	0.0103701	0.0100424	0.353913	0.316312	0.115075	0.125099
O75380	FALSE	NADH dehydrogenase [ubiquinone] iron-sulfur protein 6, mitochondrial OS=Homo sapiens OX=9606 GN=NDUFS6 PE=1 SV=1	NDUFS6																								3	2	63.8	63.8	37.1	44.3	6.7	8.2	124	127.3	40.4	41.6
O75381	FALSE	Peroxisomal membrane protein PEX14 OS=Homo sapiens OX=9606 GN=PEX14 PE=1 SV=1	PEX14		4	2	46.6	55.8	149.4	181.9	7	5.1	69.5	87.9	102.5	96.9		11	5	763.5	658.2	65	55.9	2226.6	1935.1		5	3	311.1	283.9	157.4	134.9	8.9	2.9	352.8	400.8	246.2	271.3		0.0216956	0.0245728	0.0759687	0.0823822	0.00173663	0.00137678	0.0441438	0.0362265	0.0460571	0.0449631
O75390	FALSE	Citrate synthase, mitochondrial OS=Homo sapiens OX=9606 GN=CS PE=1 SV=2	CS		44	13	2022.6	2122.1	4856.4	6027.1	315	256.7	2653.8	3910.4	4763.7	3998.5		72	14	8427.8	7409	702.3	609.6	11832.2	10146.2		93	14	7650.6	6376.5	3737.2	3545.7	256	179.5	21717.6	24344.7	2814.2	3316.4		0.941664	0.934516	2.46944	2.72966	0.0781483	0.0692978	1.68559	1.61161	2.14051	1.85537
O75396	TRUE	Vesicle-trafficking protein SEC22b OS=Homo sapiens OX=9606 GN=SEC22B PE=1 SV=4	SEC22B		29	6	826.4	877.3	3786	4513.7	159.7	148.1	1728.5	2257.1	2985.3	2503.4		45	6	2777.1	2389.6	193.5	165.4	12077.7	10946.5		39	6	2850.7	2471	1215.1	1144.9	61.5	47.5	4795.1	4503.9	3510.1	3901.5		0.384748	0.38634	1.92515	2.04425	0.0396199	0.0399806	1.09788	0.930226	1.34141	1.16162
O75400	FALSE	Pre-mRNA-processing factor 40 homolog A OS=Homo sapiens OX=9606 GN=PRPF40A PE=1 SV=2	PRPF40A		7	5	293.2	285.9	255.4	311.8	28.9	35.9	492.8	618.7	182.2	184.7		19	7	1354.2	1269.9	129.7	122.8	2116.1	1757.8		10	6	256.3	235.6	374.1	379.7	42.2	38	283.5	393.4	194.6	234.9		0.136505	0.125903	0.129869	0.141214	0.00716979	0.00969144	0.313008	0.254987	0.0818692	0.0857037
O75419	FALSE	Cell division control protein 45 homolog OS=Homo sapiens OX=9606 GN=CDC45 PE=1 SV=1	CDC45		3	2	224	267.8	150.9	174.7	7.9	9.3	233.1	308.6	113.5	104.5																								0.104288	0.117932	0.0767314	0.0791214	0.00195991	0.0025106	0.148056	0.127184	0.0509998	0.0484896
O75431	FALSE	Metaxin-2 OS=Homo sapiens OX=9606 GN=MTX2 PE=1 SV=1	MTX2		19	5	793.3	923.2	1640.1	1947	105.3	97	1786.8	2235.5	1393.8	1214.8		11	3	198.9	187.1	15.7	12	851.6	738.9		8	3	88.8	69.3	47.1	52.2	2.3	3	132.9	142.2	94.8	100		0.369337	0.406553	0.833977	0.881793	0.0261238	0.0261858	1.13491	0.921324	0.626286	0.563686
O75436	FALSE	Vacuolar protein sorting-associated protein 26A OS=Homo sapiens OX=9606 GN=VPS26A PE=1 SV=2	VPS26A		6	4	107.7	122.2	171.8	206.9	5.7	5.3	130.6	165.3	134.7	122.4		8	3	389.5	291.2	40.2	33.7	551.5	588		4	2												0.050142	0.0538136	0.0873589	0.0937047	0.00141411	0.00143077	0.0829522	0.0681256	0.0605257	0.0567955
O75438	TRUE	NADH dehydrogenase [ubiquinone] 1 beta subcomplex subunit 1 OS=Homo sapiens OX=9606 GN=NDUFB1 PE=1 SV=1	NDUFB1		5	2	67.2	81.6	629.1	766.8	34	30.9	160.8	195	418.2	397.4																								0.0312864	0.0359345	0.319892	0.347283	0.00843505	0.00834166	0.102134	0.080366	0.187913	0.1844
O75439	FALSE	Mitochondrial-processing peptidase subunit beta OS=Homo sapiens OX=9606 GN=PMPCB PE=1 SV=2	PMPCB		10	5												31	9	3450.1	3132.2	272.1	235.7	6993.9	6287.7		25	6	1060.4	960.8	1125.2	1070.3	62	42.5	1841.2	1969.6	965.1	1051.7
O75475	FALSE	PC4 and SFRS1-interacting protein OS=Homo sapiens OX=9606 GN=PSIP1 PE=1 SV=1	PSIP1		5	3	1001.4	1193.1	1658.4	2072.8	138.4	118.4	802.1	1038.6	1021.8	1067.2		19	5	6464.2	5291.8	614.1	484.5	6080.4	5600.4		28	8	5025.2	4559	3512.7	2901.2	225	178	5252	5484.6	1694.8	1860.5		0.466223	0.52541	0.843283	0.938768	0.0343356	0.0319629	0.509464	0.428042	0.459133	0.495197
O75477	TRUE	Erlin-1 OS=Homo sapiens OX=9606 GN=ERLIN1 PE=1 SV=1	ERLIN1		18	3	129	168.9	506.2	596.9	28.3	23.3	334.5	429.1	305.6	342.1		21	3	295.3	273.4	29.2	21.9	1088.2	1031															0.0600587	0.0743791	0.257399	0.270335	0.00702094	0.00628999	0.212462	0.176846	0.137317	0.15874
O75489	FALSE	NADH dehydrogenase [ubiquinone] iron-sulfur protein 3, mitochondrial OS=Homo sapiens OX=9606 GN=NDUFS3 PE=1 SV=1	NDUFS3		7	5	351	363.8	1002.9	1343.3	53.6	61.8	423.8	585.9	803.9	612.8		11	6	102	90	10	10.1	235.3	196.2		14	5	566.9	483.7	312.9	286.2	20.3	13.4	1017.9	1045.5	306.5	370.5		0.163415	0.160208	0.509966	0.608379	0.0132976	0.0166833	0.269182	0.241469	0.361222	0.284349
O75494	FALSE	Serine/arginine-rich splicing factor 10 OS=Homo sapiens OX=9606 GN=SRSF10 PE=1 SV=1	SRSF10; LOC100996657		11	4	807.4	847.7	468.1	432.9	47.8	64	1191.7	1455.1	206.9	177.4		29	5	1427.3	1310.2	131	101.5	2406.2	2204.7		6	3	89	65.7	87.7	102.1	18.8	11.8	106.5	115.1	87.9	66.9		0.375902	0.373305	0.238025	0.19606	0.0118587	0.0172772	0.756923	0.599695	0.0929679	0.0823164
O75503	TRUE	Ceroid-lipofuscinosis neuronal protein 5 OS=Homo sapiens OX=9606 GN=CLN5 PE=1 SV=2	CLN5		34	9	5315.1	5180.9	643.4	724.4	34.4	22.1	4839.9	6447.9	1037.9	784.7		50	6	6690.2	6084.1	350.1	266.9	13133.9	10520.6		15	6	294	280.4	1266.8	1315	54.1	34.4	510.7	513.8	1680.5	1931		2.47456	2.28153	0.327164	0.32808	0.00853429	0.00596604	3.07412	2.65739	0.466367	0.364113
O75521	FALSE	Enoyl-CoA delta isomerase 2, mitochondrial OS=Homo sapiens OX=9606 GN=ECI2 PE=1 SV=4	ECI2		3	2	172	223	441.1	530.3	22.2	16.9	262.5	325.3	287.2	293.9		6	2	592.3	529.9	46.3	38.2	1330.9	997.4		12	5	943.8	850.9	1016.4	974	65.3	39.2	1759.8	1960.5	706.3	785.9		0.0800782	0.0982033	0.224296	0.240172	0.00550759	0.00456227	0.16673	0.134067	0.12905	0.136374
O75531	FALSE	Barrier-to-autointegration factor OS=Homo sapiens OX=9606 GN=BANF1 PE=1 SV=1	BANF1		6	2	243.8	270.2	387.3	468.6	62.8	56.3	262	328.3	362	295.5		15	2	2156.9	2090.7	401.1	395.3	4496.7	3770.4															0.113506	0.118989	0.196939	0.212228	0.01558	0.0151986	0.166413	0.135303	0.16266	0.137117
O75533	FALSE	Splicing factor 3B subunit 1 OS=Homo sapiens OX=9606 GN=SF3B1 PE=1 SV=3	SF3B1		70	27	4569.5	5473.4	4957.8	5878.4	376	321.4	5172.9	7450	3760.1	3849.3		148	33	14732	13868.9	1156.9	1005.7	17134.3	16269.9		63	23	3432.3	3132.6	3698.3	3474	296	228.3	5857.1	7274.7	2690	3020.8		2.12743	2.41034	2.521	2.66232	0.0932817	0.086764	3.28563	3.07039	1.68955	1.78614
O75534	FALSE	Cold shock domain-containing protein E1 OS=Homo sapiens OX=9606 GN=CSDE1 PE=1 SV=2	CSDE1		29	13	1393.4	1723.8	1314.3	1648.9	113.1	96.7	1463.1	2012.1	901.7	965		63	18	8747.5	8049.3	694.9	560	7966.4	7478.7		22	12	836.8	742.6	934.6	843.2	77.5	57.8	1208.7	1519.4	489.9	589.1		0.648727	0.759116	0.668311	0.746784	0.0280589	0.0261048	0.929306	0.829253	0.405167	0.447775
O75569	FALSE	Interferon-inducible double-stranded RNA-dependent protein kinase activator A OS=Homo sapiens OX=9606 GN=PRKRA PE=1 SV=1	PRKRA															20	7	1616.9	1466.5	102.1	87.6	3113.3	3081.2		4	3	309.9	288	453.2	464.3	26.6	24	566.3	650	308.9	374.5
O75600	FALSE	2-amino-3-ketobutyrate coenzyme A ligase, mitochondrial OS=Homo sapiens OX=9606 GN=GCAT PE=1 SV=1	GCAT																								3	2	55.8	61.3	41.7	38.7		2.9	71.3	58.6	36.1	41
O75607	FALSE	Nucleoplasmin-3 OS=Homo sapiens OX=9606 GN=NPM3 PE=1 SV=3	NPM3															5	2	183.5	163.7	26.7	22.4	217.7	217.1
O75629	FALSE	Protein CREG1 OS=Homo sapiens OX=9606 GN=CREG1 PE=1 SV=1	CREG1		3	2	33.7	59.3	32.8	39.8	4.7	3.6	37.7	64.3	22.4	33.5																								0.0156897	0.0261141	0.0166785	0.0180254	0.00116602	0.000971844	0.0239456	0.0265002	0.0100652	0.0155445
O75643	FALSE	U5 small nuclear ribonucleoprotein 200 kDa helicase OS=Homo sapiens OX=9606 GN=SNRNP200 PE=1 SV=2	SNRNP200		32	14	1125.1	1374.7	1224.7	1472.2	133.1	114.7	1147.7	1684.2	852.1	926.6		62	25	6425.8	6274.2	560.7	515	5502.1	5127.5		28	12	1016	941.4	1025.2	905.1	105.9	78.1	1589.9	1868.4	641.6	745.9		0.523814	0.605381	0.62275	0.666757	0.0330207	0.030964	0.728976	0.694115	0.38288	0.429957
O75663	FALSE	TIP41-like protein OS=Homo sapiens OX=9606 GN=TIPRL PE=1 SV=2	TIPRL		16	5	935.5	1219.9	971.3	1264.8	50.4	53.8	1392	1821.8	419.1	453.3		26	5	3670.1	3408.8	265.8	191.3	5321.9	4735.2		9	3	297.3	278.7	283.6	306.5	22.5	25.6	388.9	529.2	222.9	263.5		0.435542	0.537212	0.493898	0.572826	0.0125037	0.0145237	0.884146	0.750824	0.188317	0.210338
O75694	FALSE	Nuclear pore complex protein Nup155 OS=Homo sapiens OX=9606 GN=NUP155 PE=1 SV=1	NUP155		17	8	601.2	778.1	829.2	950	60.8	49.7	938.1	1331.8	567.1	687.8		19	8	1381.8	1291.4	118.3	93.1	2171.6	2130.7		5	2	98	91.2	112.3	95.2		5.2	159.8	165.3	101	126.7		0.279901	0.342655	0.421641	0.430254	0.0150839	0.0134168	0.595846	0.548879	0.254819	0.31915
O75717	FALSE	WD repeat and HMG-box DNA-binding protein 1 OS=Homo sapiens OX=9606 GN=WDHD1 PE=1 SV=1	WDHD1																								2	2	63.7	64.3	94.2	92.3	4.7	6.7	124.6	149.6	53.5	56
O75718	FALSE	Cartilage-associated protein OS=Homo sapiens OX=9606 GN=CRTAP PE=1 SV=1	CRTAP		4	3												19	5	2008.3	1858.9	134.6	108.3	3652.3	2995
O75746	TRUE	Calcium-binding mitochondrial carrier protein Aralar1 OS=Homo sapiens OX=9606 GN=SLC25A12 PE=1 SV=2	SLC25A12		38	6	422.6	432.7	1001.6	1211.1	109.9	114.5	521.6	763.8	801.3	691		44	5	1763.8	1644.5	150.7	133.3	5159.7	4712.4		31	4	650.5	624.4	246.3	250.7	26.5	20.8	829	904.6	530	625		0.19675	0.19055	0.509305	0.548505	0.0272651	0.03091	0.331301	0.314787	0.360054	0.320635
O75787	TRUE	Renin receptor OS=Homo sapiens OX=9606 GN=ATP6AP2 PE=1 SV=2	ATP6AP2		4	3	221.4	261.6	273.7	360.4	11.9	9.6	497.9	657.9	220.8	227.9		7	3	835.3	758.5	61.4	51.1	2022.1	1786															0.103077	0.115202	0.139174	0.163225	0.00295227	0.00259158	0.316247	0.271142	0.0992137	0.105749
O75792	FALSE	Ribonuclease H2 subunit A OS=Homo sapiens OX=9606 GN=RNASEH2A PE=1 SV=2	RNASEH2A		2	2	45.9	52.9	62.9	82.8	4.5	4.4	72.7	100.1	59.5	49		2	2	157.7	129.3	10.4	7.9	270.2	241.4		3	2	107.9	86.3	73.6	78.2	9.4	5.8	226.6	273.3	75.5	90.8		0.0213697	0.0232958	0.0319841	0.0375	0.0011164	0.00118781	0.0461763	0.0412545	0.0267356	0.0227368
O75794	FALSE	Cell division cycle protein 123 homolog OS=Homo sapiens OX=9606 GN=CDC123 PE=1 SV=1	CDC123															2	2	212.4	189.7	15.5	9.9	357.3	273.8
O75821	FALSE	Eukaryotic translation initiation factor 3 subunit G OS=Homo sapiens OX=9606 GN=EIF3G PE=1 SV=2	EIF3G		23	9	1284.1	1527.2	1192.2	1565.5	107.4	92.1	2129.2	2867.7	684.5	653.5		79	15	8539	7585.7	681.9	533.1	16675.1	14525.9		40	10	3193.8	2679.7	2398.1	2302	169.6	122.9	3459.9	4221.5	1563.4	1714.6		0.59784	0.672538	0.606224	0.709013	0.0266448	0.024863	1.35239	1.18187	0.307571	0.303234
O75822	FALSE	Eukaryotic translation initiation factor 3 subunit J OS=Homo sapiens OX=9606 GN=EIF3J PE=1 SV=2	EIF3J		6	3	99	148.4	219.9	283.6	12.1	14.5	77.7	131.1	147.1	209.9		16	7	690.5	644.5	54.7	36.9	932.1	797.7		9	6	132.4	137.6	83.8	91.6	6.7	3.1	218	253.3	77.1	69.3		0.0460915	0.0653514	0.111817	0.128442	0.00300189	0.00391437	0.0493521	0.0540307	0.0660975	0.0973969
O75832	FALSE	26S proteasome non-ATPase regulatory subunit 10 OS=Homo sapiens OX=9606 GN=PSMD10 PE=1 SV=1	PSMD10		13	5	642.1	790.3	636.7	844.4	85.6	79.8	942.2	1207.3	438.5	480.1		36	8	5656.6	5229.6	565	491.6	8531.9	6953.8		14	4	1169.1	969.3	893.3	939.2	112	93	1762	2138.6	678.7	759.8		0.298943	0.348027	0.323757	0.382428	0.0212365	0.0215425	0.59845	0.497568	0.197034	0.222774
O75844	TRUE	CAAX prenyl protease 1 homolog OS=Homo sapiens OX=9606 GN=ZMPSTE24 PE=1 SV=2	ZMPSTE24		58	12	3104.8	3301.7	9731.6	12482.4	347.9	438	10696.7	15018.8	10622.3	8915.3		116	15	13565.1	12550.7	945.9	777.9	62143.8	49790.8		60	11	4056.9	3799.3	3101.3	3031.8	150.4	125.1	5002.1	5428	12355.9	14237.3		1.4455	1.45398	4.94844	5.65326	0.0863104	0.118241	6.79414	6.18975	4.77299	4.13684
O75845	TRUE	Lathosterol oxidase OS=Homo sapiens OX=9606 GN=SC5D PE=1 SV=2	SC5D; SC5DL															10	3	733.4	644.4	52.9	37.4	2613.5	2842.1
O75874	FALSE	Isocitrate dehydrogenase [NADP] cytoplasmic OS=Homo sapiens OX=9606 GN=IDH1 PE=1 SV=2	IDH1		68	16	5255.7	6452.2	2603	3348.4	172.7	182.4	8672.8	12000.7	2215.7	2273.2		42	9	5328.3	4884.5	346.3	306.7	4012.1	3831.3		18	8	1007.9	984.1	467.1	454.4	43.7	31.4	1605.3	2138.4	467	559.9		2.4469	2.84138	1.3236	1.51649	0.0428451	0.0492401	5.50864	4.94589	0.995596	1.0548
O75880	TRUE	Protein SCO1 homolog, mitochondrial OS=Homo sapiens OX=9606 GN=SCO1 PE=1 SV=1	SCO1		8	3	470.2	542.5	1629.8	1998	81	68.9	1156.2	1460.4	1152	1192.5		17	3	1063.1	936.5	59.8	38	6990.3	6160.5		10	3	927.7	806.6	334.4	336.1	16.9	3.7	1434.6	1473	1091.5	1219.2		0.218911	0.238903	0.82874	0.904891	0.0200953	0.0186	0.734375	0.601879	0.517636	0.553339
O75915	TRUE	PRA1 family protein 3 OS=Homo sapiens OX=9606 GN=ARL6IP5 PE=1 SV=1	ARL6IP5		22	3	452.6	498.2	4878.2	5929.1	186.7	168	715.7	871.2	3577	3311.5		26	4	2979.2	2601.8	206	172.5	11712.5	10147.9		29	4	3207.5	3561	1464.2	1593.6	98.4	61.9	2635.2	2040.6	3106.1	3222.8		0.210717	0.219394	2.48052	2.68528	0.0463183	0.0453527	0.454586	0.35905	1.60728	1.53659
O75934	FALSE	Pre-mRNA-splicing factor SPF27 OS=Homo sapiens OX=9606 GN=BCAS2 PE=1 SV=1	BCAS2		18	7	695.3	700.2	493.6	607.4	34.5	29.3	848.1	1149.6	362.6	302.9		13	5	855.1	797.5	54.8	43.4	1784.1	1437.3		10	5	638.6	582	446.7	458.1	32.6	26.1	1219.6	1343.4	359.6	380.5		0.323712	0.308349	0.250992	0.275091	0.00855909	0.00790973	0.538681	0.473788	0.16293	0.14055
O75935	FALSE	Dynactin subunit 3 OS=Homo sapiens OX=9606 GN=DCTN3 PE=1 SV=1	DCTN3		23	7	1995.6	2141.6	500.8	604.8	26.2	23.6	6883.6	8591.4	460.5	382.3		33	7	3454.8	3152.3	187.1	133.6	10763.7	9541.6		9	4	475.8	397.2	310.9	315.1	12.2	9.3	612.8	725.1	447.3	500.8		0.929094	0.943104	0.254653	0.273913	0.00649995	0.00637097	4.37221	3.5408	0.20692	0.177393
O75937	FALSE	DnaJ homolog subfamily C member 8 OS=Homo sapiens OX=9606 GN=DNAJC8 PE=1 SV=2	DNAJC8		3	2	44.3	46.3	38.7	44.1			57.3	77.2	31.1	26.4		20	8	2667.2	2241.9	174.6	132.3	5570.9	5022.3		13	5	2974.9	2420.5	1428.7	1332	63.7	52.5	3147.5	3275.7	1133.3	1331.1		0.0206248	0.0203893	0.0196786	0.0199728			0.0363948	0.0318167	0.0139744	0.01225
O75940	FALSE	Survival of motor neuron-related-splicing factor 30 OS=Homo sapiens OX=9606 GN=SMNDC1 PE=1 SV=1	SMNDC1															6	4	711.9	595.3	58	47.4	948.5	843.5
O75947	FALSE	ATP synthase subunit d, mitochondrial OS=Homo sapiens OX=9606 GN=ATP5PD PE=1 SV=3	ATP5H		13	4	650.3	722.8	1167.1	1529.4	73.2	80.1	695.3	975.4	1017	980.5		10	3	1832.9	1521.7	152	125.9	3970.8	3204.8		35	8	3686.7	3358.6	2100.2	1922.3	107.5	86.8	5249.1	5832.9	1931.8	2351.1		0.302761	0.318302	0.593461	0.692663	0.0181602	0.0216235	0.441629	0.401995	0.456976	0.454967
O75955	FALSE	Flotillin-1 OS=Homo sapiens OX=9606 GN=FLOT1 PE=1 SV=3	FLOT1		20	12	841.9	995.7	904.2	1077.4	47.3	43.2	1345.5	1847.7	559.7	565.3		66	18	3565.5	3169.4	229.5	154.4	16219.8	15055.7		12	4	336.9	321.4	362.9	358.5	16	11.7	610.4	703	1157.3	1223.9		0.391964	0.43848	0.459778	0.487953	0.0117346	0.0116621	0.854611	0.761499	0.251494	0.262308
O75964	FALSE	ATP synthase subunit g, mitochondrial OS=Homo sapiens OX=9606 GN=ATP5MG PE=1 SV=3	ATP5L		21	4	286.6	277.5	2067.1	2622.6	70.6	79.7	346.7	409.9	2173.1	1652.8		27	5	1850.6	1527.6	145.2	128.3	6505.2	5185.4		18	4	1888.3	1523.4	304.9	265.7	16.2	12	2006.9	1958.3	1133.2	1282.5		0.133433	0.122204	1.0511	1.18777	0.0175151	0.0215155	0.220211	0.168933	0.976455	0.766925
O75976	TRUE	Carboxypeptidase D OS=Homo sapiens OX=9606 GN=CPD PE=1 SV=2	CPD		2	2												32	11	3866	3541.4	256.4	210.2	4335	4312.1		4	3	83.4	96	167.2	135.2	7.6	7.6	134.7	157.4	176.4	203.6
O76003	FALSE	Glutaredoxin-3 OS=Homo sapiens OX=9606 GN=GLRX3 PE=1 SV=2	GLRX3		23	7	1484.3	1733.5	2489.8	3036.2	155.3	147.2	1409.1	1926.8	1401.5	1449.7		46	9	6299.5	5584.7	542.8	455.7	8553.6	8187.2		30	7	2687.2	2498.8	2610.2	2723.9	194.7	148	4274.4	4559.1	1444.1	1769		0.691047	0.763387	1.26604	1.37509	0.0385283	0.0397376	0.895008	0.794098	0.629746	0.672683
O76021	FALSE	Ribosomal L1 domain-containing protein 1 OS=Homo sapiens OX=9606 GN=RSL1D1 PE=1 SV=3	RSL1D1		32	14	924	1057.2	1424.7	1748.4	126.7	120.4	887	1131	1216.9	1073		48	13	4415.7	3921.7	559.4	464.9	6730.3	5632.5		51	17	4435.9	3993.7	3779.9	3107.5	262.2	220.7	6206.1	6875.4	2133.2	2308.2		0.430188	0.465563	0.724448	0.791848	0.031433	0.0325028	0.563389	0.466123	0.546798	0.497889
O76024	TRUE	Wolframin OS=Homo sapiens OX=9606 GN=WFS1 PE=1 SV=2	WFS1		6	3	11.6	19.2	70.2	80.4	1.9	2.3	26.8	57.8	45	61.6		9	5	95	77.9	8.5	7.8	313.5	324.4															0.00540062	0.00845517	0.0356961	0.036413	0.00047137	0.0006209	0.0170224	0.0238213	0.0202202	0.0285834
O76031	FALSE	ATP-dependent Clp protease ATP-binding subunit clpX-like, mitochondrial OS=Homo sapiens OX=9606 GN=CLPX PE=1 SV=2	CLPX		4	2	125.1	155.8	131.2	178.3	10.3	12.6	335.2	504.4	110.8	119		22	8	1379.8	1243.3	118.3	107.4	4676.8	3774.5		5	3	223.2	189.6	154.4	137.3	10.7	8.1	440.3	500.3	138.8	137.9		0.0582429	0.0686102	0.0667141	0.0807518	0.00255532	0.00340145	0.212907	0.20788	0.0497866	0.0552179
O76094	FALSE	Signal recognition particle subunit SRP72 OS=Homo sapiens OX=9606 GN=SRP72 PE=1 SV=3	SRP72		11	6	154.6	196.3	459.9	556.4	36.1	33.8	178.5	242.6	295.2	334		10	3	727.2	616	56.5	44.6	856.8	790		15	5	587.1	518.1	410.6	393.2	42	32	1026.9	1280	272.2	313.8		0.0719773	0.0864453	0.233855	0.251993	0.00895604	0.00912453	0.113377	0.0999835	0.132644	0.154981
O94760	FALSE	N(G),N(G)-dimethylarginine dimethylaminohydrolase 1 OS=Homo sapiens OX=9606 GN=DDAH1 PE=1 SV=3	DDAH1																								6	3	178.7	168.2	128.2	122	15.7	16.1	249.8	332.1	95.8	124.2
O94766	TRUE	Galactosylgalactosylxylosylprotein 3-beta-glucuronosyltransferase 3 OS=Homo sapiens OX=9606 GN=B3GAT3 PE=1 SV=2	B3GAT3															3	2	58.4	53.8	2.3	4.1	175.2	166.7
O94776	FALSE	Metastasis-associated protein MTA2 OS=Homo sapiens OX=9606 GN=MTA2 PE=1 SV=1	MTA2		6	4	361.3	400.6	545.3	639.3	41.9	39.2	387.5	511.6	377	350.6		16	6	783	717.1	74	72.3	908.8	793.9		16	6	835.1	773.1	940.8	877.5	63	53.6	1604.8	1847.3	543	616.2		0.168211	0.176414	0.277281	0.289538	0.010395	0.0105823	0.246126	0.210847	0.1694	0.162684
O94788	FALSE	Retinal dehydrogenase 2 OS=Homo sapiens OX=9606 GN=ALDH1A2 PE=1 SV=3	ALDH1A2		15	4	377.2	372	283.8	335.6	15.1	11.8	167	215.1	421.8	358.7		10	2	274.9	257.6	29.5	30.7	425.7	388.2															0.175613	0.163819	0.14431	0.151993	0.00374615	0.00318549	0.106072	0.0886499	0.18953	0.166442
O94826	TRUE	Mitochondrial import receptor subunit TOM70 OS=Homo sapiens OX=9606 GN=TOMM70 PE=1 SV=1	TOMM70A; TOMM70		57	19	2985.3	3362.7	6375.2	7703.9	401.3	411.4	6563.4	9190	5256.1	5311.7		114	22	8692.7	7931	688.9	584.6	33247.1	31759		74	20	6503	5850.1	2878.1	2689.7	178.4	140.9	9623.2	9739.8	4974.1	5328.2		1.38987	1.48084	3.24174	3.48909	0.0995584	0.11106	4.16883	3.7875	2.36176	2.46471
O94874	FALSE	E3 UFM1-protein ligase 1 OS=Homo sapiens OX=9606 GN=UFL1 PE=1 SV=2	UFL1		2	2												5	4	330.1	307.3	30.4	25.1	629.5	537		8	4	732.7	637	588.4	559.2	40.9	37.3	1346.5	1499.9	564.5	611.4
O94888	FALSE	UBX domain-containing protein 7 OS=Homo sapiens OX=9606 GN=UBXN7 PE=1 SV=2	UBXN7															11	4	644.2	531.7	56.7	55.7	1236.2	1130.8
O94901	TRUE	SUN domain-containing protein 1 OS=Homo sapiens OX=9606 GN=SUN1 PE=1 SV=3	SUN1		10	6	254.5	246.1	612.2	711.1	44.5	43.6	414.6	558.5	682.7	558.2		3	2																					0.118488	0.108376	0.311299	0.322056	0.01104	0.0117701	0.263338	0.230176	0.306763	0.259014
O94905	TRUE	Erlin-2 OS=Homo sapiens OX=9606 GN=ERLIN2 PE=1 SV=1	ERLIN2		48	12	1290.5	1512.1	8359.9	9760.7	385.1	363.1	1747.6	2307.9	6703.2	5648.8		39	9	2252.1	1941.4	185.2	163.6	7648.8	6628.2		30	8	2758.7	2560.1	1466.2	1318	130.4	94.5	4617.9	4929.7	2211.1	2471.9		0.600819	0.665889	4.25094	4.42061	0.0955393	0.0980212	1.11001	0.951162	3.012	2.62113
O94906	FALSE	Pre-mRNA-processing factor 6 OS=Homo sapiens OX=9606 GN=PRPF6 PE=1 SV=1	PRPF6		5	3	363.8	420.4	493.2	579.2	43.1	27.1	683	1049.1	407.9	406.7		9	5	814.4	721.9	71.4	58.6	1254.6	1184.8		2	2												0.169375	0.185133	0.250788	0.262319	0.0106927	0.00731582	0.433816	0.432369	0.183285	0.188715
O94919	FALSE	Endonuclease domain-containing 1 protein OS=Homo sapiens OX=9606 GN=ENDOD1 PE=1 SV=2	ENDOD1		12	7	259.8	285.5	969.6	1212.5	38.1	48.2	323.9	453.3	932	824.6		17	6	840.5	788	59.3	57.2	2952.5	2857.1		2	2	48.6	45.4	42.8	40.7		3.5	73.8	71.8	178.6	203.8		0.120955	0.125727	0.493034	0.549139	0.00945222	0.0130119	0.205729	0.18682	0.418782	0.382627
O94925	FALSE	Glutaminase kidney isoform, mitochondrial OS=Homo sapiens OX=9606 GN=GLS PE=1 SV=1	GLS		8	4	216.5	237.9	740	881.9	34.7	34	377.4	540.2	514	446.3											8	4	758.7	603.7	303	273	21	20.4	1537.1	1688.4	293.2	293.3		0.100796	0.104765	0.376284	0.399411	0.00860871	0.00917852	0.23971	0.222634	0.230959	0.20709
O94925-3	FALSE	Isoform 3 of Glutaminase kidney isoform, mitochondrial OS=Homo sapiens OX=9606 GN=GLS	GLS															23	8	1824.2	1844.5	115.7	109.3	1631.1	1329.9
O94927	FALSE	HAUS augmin-like complex subunit 5 OS=Homo sapiens OX=9606 GN=HAUS5 PE=1 SV=2	HAUS5															15	4	300.6	299.6	23.8	21.3	486	422.8
O94979	FALSE	Protein transport protein Sec31A OS=Homo sapiens OX=9606 GN=SEC31A PE=1 SV=3	SEC31A		6	4	435.9	646.4	621.1	787.2	52.3	40.6	599.5	895.7	434	591.6		13	7	2410.2	2199.7	197.3	170.9	3560.9	3396.9		9	4	535.6	478.7	438.9	429.7	38.4	28.5	869.8	1122.7	315.7	364.9		0.202942	0.284657	0.315824	0.356522	0.0129751	0.0109602	0.38078	0.369148	0.195012	0.274512
O94992	FALSE	Protein HEXIM1 OS=Homo sapiens OX=9606 GN=HEXIM1 PE=1 SV=1	HEXIM1		5	3	174.9	187.8	117.2	155.1	4.7	6.6	173.2	245.3	63	67.5		5	3	664.5	595.5	62.9	41.2	643.4	618.9		6	3	95.2	111.1	90.5	82.4	4.3	5.9	113.7	164.6	56.3	66.5		0.0814284	0.0827021	0.0595952	0.0702446	0.00116602	0.00178171	0.11001	0.101096	0.0283082	0.0313211
O95070	TRUE	Protein YIF1A OS=Homo sapiens OX=9606 GN=YIF1A PE=1 SV=2	YIF1A															8	3	348.7	331.9	18.3	21	2512.5	2152.8
O95139	TRUE	NADH dehydrogenase [ubiquinone] 1 beta subcomplex subunit 6 OS=Homo sapiens OX=9606 GN=NDUFB6 PE=1 SV=3	NDUFB6		19	3	96.5	109.6	564.5	714.1	35.7	34.3	278	373.9	420.8	394.6		23	5	1002.6	857.2	81.4	65.1	4776.3	3795.4		20	4	595.8	549.2	201.5	182.9	23.3	29.7	856.6	873.8	529.8	558.7		0.0449276	0.0482649	0.287044	0.323415	0.0088568	0.00925951	0.176575	0.154097	0.189081	0.183101
O95163	FALSE	Elongator complex protein 1 OS=Homo sapiens OX=9606 GN=ELP1 PE=1 SV=3	IKBKAP; ELP1		5	4	71	69.4	73.3	103	7.4	8	70.5	100.7	59.3	58.6		8	3	400	376.4	24.6	24.4	448.2	416.8															0.0330555	0.0305619	0.0372724	0.0466486	0.00183586	0.00215965	0.044779	0.0415018	0.0266457	0.0271913
O95167	TRUE	NADH dehydrogenase [ubiquinone] 1 alpha subcomplex subunit 3 OS=Homo sapiens OX=9606 GN=NDUFA3 PE=1 SV=1	NDUFA3		8	3	141.2	164.1	481.5	592.4	13.7	18.6	460.5	596.4	1030.7	981.4																								0.0657386	0.0722653	0.244839	0.268297	0.00339883	0.00502119	0.292492	0.245796	0.463132	0.455385
O95168	TRUE	NADH dehydrogenase [ubiquinone] 1 beta subcomplex subunit 4 OS=Homo sapiens OX=9606 GN=NDUFB4 PE=1 SV=3	NDUFB4		15	4	608.3	639.6	2146.8	2422	76.3	87.9	911.1	1102.2	1661.6	1300.7		13	3	671.5	592	47.2	30.9	3192.4	2794.2		13	3	745.2	626	356.8	346.4	15.8	12.8	1545.1	1593.5	849.4	898.2		0.283207	0.281663	1.09163	1.09692	0.0189292	0.0237292	0.578697	0.454253	0.746619	0.603545
O95169	TRUE	NADH dehydrogenase [ubiquinone] 1 beta subcomplex subunit 8, mitochondrial OS=Homo sapiens OX=9606 GN=NDUFB8 PE=1 SV=1	NDUFB8		11	3	206.3	222.7	1126	1305.3	41.2	45.7	371.8	428.8	1472.2	1069.5		7	2	142.2	127.7	11.5	8.8	601.3	456.7															0.0960473	0.0980712	0.572562	0.591168	0.0102213	0.012337	0.236153	0.176723	0.661514	0.496265
O95197	FALSE	Reticulon-3 OS=Homo sapiens OX=9606 GN=RTN3 PE=1 SV=2	RTN3		25	4	781.2	855.5	2864.4	3690.7	110.2	133.8	1950.7	2533.8	3151.1	2650.2											13	2	2218	1923.5	1001	861.7	49.7	24	2584.4	2853.1	4352.1	4442		0.363704	0.376739	1.45652	1.67151	0.0273395	0.0361202	1.23901	1.04426	1.41591	1.22973
O95197-3	FALSE	Isoform 3 of Reticulon-3 OS=Homo sapiens OX=9606 GN=RTN3	RTN3															39	4	3519.3	2982.4	314.3	285	22678	17108.2
O95202	TRUE	Mitochondrial proton/calcium exchanger protein OS=Homo sapiens OX=9606 GN=LETM1 PE=1 SV=1	LETM1		75	22	4747.1	5431.5	6281.9	7722.9	345.8	322.5	9432.1	13264.6	5859.1	5598.5		165	27	10092.9	8965	673.9	568.9	48931.3	42169.9		82	21	6553.9	5814.7	3154.8	2979.4	211.2	156.3	9181.3	10150.9	9693.5	10156.1		2.21011	2.39189	3.19429	3.49769	0.0857894	0.087061	5.99092	5.46678	2.63271	2.59779
O95218	FALSE	Zinc finger Ran-binding domain-containing protein 2 OS=Homo sapiens OX=9606 GN=ZRANB2 PE=1 SV=2	ZRANB2		6	2	120.9	129.2	167.7	132	21	23	250.2	264.3	74.4	74.6		5	3	258.9	207.7	29.9	18.4	326.2	297.6		8	3	984.3	612.6	639.9	860.2	119.5	98.7	1233.6	1551.2	585	516.9		0.0562875	0.0568962	0.0852741	0.0597826	0.00520988	0.006209	0.158918	0.108927	0.0334307	0.0346156
O95219	FALSE	Sorting nexin-4 OS=Homo sapiens OX=9606 GN=SNX4 PE=1 SV=1	SNX4															4	2	100.7	115.2	9.5	10.6	233.6	195
O95232	FALSE	Luc7-like protein 3 OS=Homo sapiens OX=9606 GN=LUC7L3 PE=1 SV=2	LUC7L3		4	2	399.3	413.1	489.8	553.4	83	81.5	429.1	497	370.8	343.4		10	4	1984	1744.9	280.6	253.4	2159.4	1863.7		4	3	117.2	76.7	60.2	64.8	16.9	13.6	167.2	217.1	50.8	42.4		0.185903	0.181918	0.249059	0.250634	0.0205914	0.0220015	0.272548	0.20483	0.166614	0.159343
O95249	TRUE	Golgi SNAP receptor complex member 1 OS=Homo sapiens OX=9606 GN=GOSR1 PE=1 SV=1	GOSR1		4	2	158	169.3	198.2	239.3	10.8	12.6	241.3	330.1	144.4	145.7		12	4	954.8	862.5	69.8	54.2	3390.9	3020.4															0.0735602	0.0745552	0.100783	0.108379	0.00267937	0.00340145	0.153265	0.136045	0.0648843	0.0676071
O95258	TRUE	Brain mitochondrial carrier protein 1 OS=Homo sapiens OX=9606 GN=SLC25A14 PE=2 SV=1	SLC25A14		5	2																					6	3	52	43.8	31.2	35.6			72.9	79.2	56.2	56.4
O95292	TRUE	Vesicle-associated membrane protein-associated protein B/C OS=Homo sapiens OX=9606 GN=VAPB PE=1 SV=3	VAPB		10	4	103.3	124.4	310.8	366.5	22.3	17.7	134.2	178.3	215.4	209.7		18	3	964.6	906.7	97.4	97.4	2898.4	2684.1		17	2	285.1	239.3	159.8	154.6	5.4	2.7	534.2	542.9	222.4	240.9		0.0480935	0.0547825	0.158039	0.165987	0.0055324	0.00477823	0.0852388	0.0734833	0.0967872	0.0973041
O95297	TRUE	Myelin protein zero-like protein 1 OS=Homo sapiens OX=9606 GN=MPZL1 PE=1 SV=1	MPZL1															3	2
O95298	TRUE	NADH dehydrogenase [ubiquinone] 1 subunit C2 OS=Homo sapiens OX=9606 GN=NDUFC2 PE=1 SV=1	NDUFC2; NDUFC2-KCTD14		8	3	324.5	352.6	1240.2	1672.2	98	118.5	987.6	1258.5	1168.1	949.2		7	2	1016.9	881.4	180.3	189.8	3875.1	2917		5	2	687.4	633.9	501.4	515.7	128.7	84.8	1693.4	568.6	1147.2	1298.1		0.151078	0.155276	0.630632	0.757337	0.0243128	0.0319898	0.627287	0.51867	0.524871	0.440444
O95299	FALSE	NADH dehydrogenase [ubiquinone] 1 alpha subcomplex subunit 10, mitochondrial OS=Homo sapiens OX=9606 GN=NDUFA10 PE=1 SV=1	NDUFA10		4	3	102.5	132.8	404.7	498.4	19.7	13.9	336	405.9	278.3	302.5		21	7	1506.5	1271.8	117.1	109.7	8892.8	7195.3		16	7	2043.8	1761.3	1065	1025.1	57.5	51.3	3049.2	3181.6	2572.1	2875.5		0.047721	0.0584816	0.205787	0.225725	0.00488737	0.0037524	0.213415	0.167285	0.125051	0.140365
O95336	FALSE	6-phosphogluconolactonase OS=Homo sapiens OX=9606 GN=PGLS PE=1 SV=2	PGLS		13	4	94	106.9	462.6	672.9	31.4	36.5	151.9	246.4	189.3	178.9		9	3	254.2	218.3	25.6	18.7	484.1	431.9		9	2	365.5	323.5	229	249.3	30.7	22.8	613.4	786.4	181.3	228.9		0.0437637	0.0470759	0.235228	0.304755	0.00779002	0.00985341	0.0964812	0.10155	0.0850595	0.0830124
O95347	FALSE	Structural maintenance of chromosomes protein 2 OS=Homo sapiens OX=9606 GN=SMC2 PE=1 SV=2	SMC2		18	9	697.4	831.1	815.2	1002.5	52.8	42	1243.7	1652.1	627.8	659.9		44	18	3310.1	2939.3	243.2	206	5658.7	5224.5		12	7	769.8	733.9	792.3	731.1	51.1	39.6	1074.1	1269.3	525.3	597.8		0.324689	0.365994	0.414523	0.454031	0.0130991	0.0113382	0.789952	0.680885	0.282094	0.306204
O95372	FALSE	Acyl-protein thioesterase 2 OS=Homo sapiens OX=9606 GN=LYPLA2 PE=1 SV=1	LYPLA2		4	2	96.4	115.8	306	390.7	15	16.9	145.9	184.5	194.5	244.7		8	4	255.9	226	31.9	25.9	390.3	309.1		8	4	158.4	150.2	103.6	114.7	7.6	8	194.9	239.5	82	103.1		0.044881	0.0509952	0.155598	0.176947	0.00372135	0.00456227	0.0926702	0.0760386	0.0873961	0.113545
O95373	FALSE	Importin-7 OS=Homo sapiens OX=9606 GN=IPO7 PE=1 SV=1	IPO7		56	15	2940.9	2997	2535.9	3093	155	134.7	4029.6	5832.5	2277.5	1909.3		169	20	14835.2	14858.4	1104.5	939.4	35753.7	30632.8		22	9	626	552.9	789.8	838.1	59.6	41.2	990	1197.2	665.4	721.4		1.3692	1.3198	1.28948	1.40082	0.0384539	0.0363631	2.55945	2.40377	1.02337	0.885945
O95376	FALSE	E3 ubiquitin-protein ligase ARIH2 OS=Homo sapiens OX=9606 GN=ARIH2 PE=1 SV=1	ARIH2		4	2	141.2	175.2	135.3	156	8.9	6.7	160.2	242.5	104.4	100.8		6	3	551.1	550.2	36.6	36.4	936.9	831.6		4	2	192.6	159	219.2	218.8	6.6	12	351.3	483.3	120.2	146.4		0.0657386	0.0771534	0.0687989	0.0706522	0.002208	0.00180871	0.101753	0.0999423	0.0469108	0.0467728
O95394	FALSE	Phosphoacetylglucosamine mutase OS=Homo sapiens OX=9606 GN=PGM3 PE=1 SV=1	PGM3		6	4	798.1	849.4	873.3	1056.2	107	127.7	893.2	1223.8	861.7	671.5		9	5	1194.6	1085.3	87.2	73.6	1476.3	1385.8		11	4	449.4	413.3	401.5	419	36.2	30.2	803.3	1007.9	311.6	381.3		0.371572	0.374053	0.444066	0.478351	0.0265456	0.0344734	0.567327	0.504369	0.387194	0.311586
O95400	FALSE	CD2 antigen cytoplasmic tail-binding protein 2 OS=Homo sapiens OX=9606 GN=CD2BP2 PE=1 SV=1	CD2BP2															6	2	55.8	44.3	5.7	5.2	46.4	55.4
O95433	FALSE	Activator of 90 kDa heat shock protein ATPase homolog 1 OS=Homo sapiens OX=9606 GN=AHSA1 PE=1 SV=1	AHSA1		21	7	1146.8	1187.1	996.4	1291.5	48.7	59.9	1243.2	1619.1	996.6	877.8		33	9	1815.8	1665.3	144.6	124.9	4315.3	3333.6		27	8	939.1	881.4	873.9	989.8	47.4	43.1	1598.2	1952	605.2	720.5		0.533917	0.522767	0.506661	0.584918	0.012082	0.0161704	0.789634	0.667285	0.447809	0.407313
O95456	FALSE	Proteasome assembly chaperone 1 OS=Homo sapiens OX=9606 GN=PSMG1 PE=1 SV=1	PSMG1		11	5	141.4	143.1	323.6	390	17.8	12.8	265.6	346.6	190.3	132.5		13	3	1593.3	1465.9	129.7	103.7	3100.7	2594.3		4	2	211.8	174	203.2	196.6	20.5	16.2	367.7	507.3	140.4	160.5		0.0658317	0.0630174	0.164548	0.17663	0.004416	0.00345544	0.168699	0.142845	0.0855089	0.0614821
O95470	TRUE	Sphingosine-1-phosphate lyase 1 OS=Homo sapiens OX=9606 GN=SGPL1 PE=1 SV=3	SGPL1		44	14	1389.1	1593.4	3306.9	4096	197.3	196.3	2368.7	3268.9	3338.6	3343.1		65	15	3345	3090.6	228.7	183.7	11816	10543.8		30	10	787.9	708.4	877.8	901.4	43.6	33	1097.9	1211.9	2514.4	2838.8		0.646725	0.701691	1.68153	1.85507	0.0489481	0.0529925	1.50451	1.34722	1.50016	1.55125
O95478	FALSE	Ribosome biogenesis protein NSA2 homolog OS=Homo sapiens OX=9606 GN=NSA2 PE=1 SV=1	NSA2															7	3	432.6	376.6	46	33.1	649.6	601.4
O95487	FALSE	Protein transport protein Sec24B OS=Homo sapiens OX=9606 GN=SEC24B PE=1 SV=2	SEC24B															2	2
O95562	TRUE	Vesicle transport protein SFT2B OS=Homo sapiens OX=9606 GN=SFT2D2 PE=1 SV=1	SFT2D2		3	2	194.4	188.8	725.6	861	37.4	31.8	220.3	268.2	544.8	480.6																								0.090507	0.0831425	0.368962	0.389946	0.00927856	0.00858462	0.139926	0.110534	0.244799	0.223006
O95563	TRUE	Mitochondrial pyruvate carrier 2 OS=Homo sapiens OX=9606 GN=MPC2 PE=1 SV=1	MPC2		23	4	69.9	60.6	1462.2	1773.5	46.7	78	88.4	103.6	2209.6	1435.1		9	2	250.7	214.7	15.9	19.2	1155.7	898.2															0.0325434	0.0266866	0.743517	0.803216	0.0115858	0.0210566	0.0561484	0.042697	0.992856	0.665909
O95573	TRUE	Long-chain-fatty-acid--CoA ligase 3 OS=Homo sapiens OX=9606 GN=ACSL3 PE=1 SV=3	ACSL3		35	13	620.9	688.7	2931.2	3577.6	182.9	196	1099.8	1545.3	2387.6	2321.1		23	8	2130.9	1971.4	183.1	163.8	5844.1	5381.8		20	5	1761.5	1684.9	1143.8	1132.1	92	64.2	3134.9	3451.8	1313.7	1527.6		0.289073	0.303285	1.49049	1.62029	0.0453756	0.0529115	0.698552	0.636869	1.07284	1.07703
O95602	FALSE	DNA-directed RNA polymerase I subunit RPA1 OS=Homo sapiens OX=9606 GN=POLR1A PE=1 SV=2	POLR1A																								2	2
O95619	FALSE	YEATS domain-containing protein 4 OS=Homo sapiens OX=9606 GN=YEATS4 PE=1 SV=1	YEATS4															4	2	105.6	79.5	6.9	8.4	144.1	135
O95628	FALSE	CCR4-NOT transcription complex subunit 4 OS=Homo sapiens OX=9606 GN=CNOT4 PE=1 SV=3	CNOT4		5	3	178.5	229.6	163.8	206.2	13.7	12	1114	1540.2	95.4	112.6		42	12	2015	1735	157.4	127.7	11048.7	9946.3		2	2												0.0831044	0.10111	0.083291	0.0933877	0.00339883	0.00323948	0.707571	0.634768	0.0428668	0.0522482
O95671	FALSE	N-acetylserotonin O-methyltransferase-like protein OS=Homo sapiens OX=9606 GN=ASMTL PE=1 SV=3	ASMTL															9	3	431.8	427.2	37.4	31.2	679.6	750.9
O95674	TRUE	Phosphatidate cytidylyltransferase 2 OS=Homo sapiens OX=9606 GN=CDS2 PE=1 SV=1	CDS2		12	4	233.8	244.6	1317.2	1707.4	70.3	75.8	645	967.3	1287.1	1113.2		20	3	791.1	689.9	35.9	41.2	4675.6	4494.8															0.108851	0.107715	0.669785	0.773279	0.0174407	0.0204627	0.40968	0.398656	0.578342	0.516542
O95684	FALSE	FGFR1 oncogene partner OS=Homo sapiens OX=9606 GN=FGFR1OP PE=1 SV=1	FGFR1OP		5	2	562.9	635.2	107.5	128.9	2.2	2	308.3	441.5	100.4	101.8																								0.26207	0.279725	0.0546629	0.0583786	0.000545797	0.000539913	0.195821	0.181957	0.0451135	0.0472368
O95716	FALSE	Ras-related protein Rab-3D OS=Homo sapiens OX=9606 GN=RAB3D PE=1 SV=1	RAB3D		11	2	76.9	92.2	439.6	585.9	26.1	16.6	78.5	123.8	294	275.2																								0.0358024	0.0406024	0.223533	0.265353	0.00647514	0.00448128	0.0498603	0.0510221	0.132105	0.127697
O95721	FALSE	Synaptosomal-associated protein 29 OS=Homo sapiens OX=9606 GN=SNAP29 PE=1 SV=1	SNAP29															4	2
O95757	FALSE	Heat shock 70 kDa protein 4L OS=Homo sapiens OX=9606 GN=HSPA4L PE=1 SV=3	HSPA4L		38	11	486.8	538.7	1000	1245.9	64.2	60	491.4	714.3	834.4	777		44	15	1573.2	1492.7	126.8	116.2	2515.5	2124.5		39	11	947	817.7	753.1	753.4	65.2	46	1477.2	1869.8	523.6	613.7		0.22664	0.237229	0.508492	0.564266	0.0159274	0.0161974	0.312119	0.294387	0.374927	0.36054
O95758-1	FALSE	Isoform 1 of Polypyrimidine tract-binding protein 3 OS=Homo sapiens OX=9606 GN=PTBP3	PTBP3		18	2	29.5	33	29.9	40.9	2.2		46.6	73.3	31	21.3																								0.0137343	0.0145323	0.0152039	0.0185236	0.000545797		0.0295986	0.0302094	0.0139295	0.00988353
O95772	TRUE	STARD3 N-terminal-like protein OS=Homo sapiens OX=9606 GN=STARD3NL PE=1 SV=1	STARD3NL															8	2	95.1	71.9	2.7	2.6	427.5	330.8
O95782	FALSE	AP-2 complex subunit alpha-1 OS=Homo sapiens OX=9606 GN=AP2A1 PE=1 SV=3	AP2A1		8	4	250.6	262	222.5	251.7	14.8	13.1	317	451.5	200.5	162.4		13	5	941.4	854.2	83.2	68.1	2563.4	2326.3		8	4	215.4	205.7	146.7	124.2	4.9	9.7	334.2	410.5	151.2	189.9		0.116672	0.115378	0.113139	0.113995	0.00367173	0.00353643	0.201347	0.186078	0.0900921	0.0753561
O95785	FALSE	Protein Wiz OS=Homo sapiens OX=9606 GN=WIZ PE=1 SV=2	WIZ															11	5	484.9	448.2	36.3	24.4	414.1	382.5
O95793	FALSE	Double-stranded RNA-binding protein Staufen homolog 1 OS=Homo sapiens OX=9606 GN=STAU1 PE=1 SV=2	STAU1		10	5	284.8	313.9	378.1	505.2	20.1	23.6	629.4	830.3	194.6	218.5		16	7	1161.4	1062.7	129.6	105.9	2087.5	1866.7		8	4	125	115.7	142.5	222	42.3	5.5	239.7	281.6	116.1	157.9		0.132595	0.138233	0.192261	0.228804	0.0049866	0.00637097	0.399771	0.342194	0.087441	0.101387
O95801	FALSE	Tetratricopeptide repeat protein 4 OS=Homo sapiens OX=9606 GN=TTC4 PE=1 SV=3	TTC4		3	2	178.8	228.7	270.3	375	9.4	14.3	328	394.4	131.8	154.5		8	4	680.3	607.3	51.4	37.4	955.5	904.4		3	2	165.7	145.1	156	153.9	9.9	8.8	310.4	406.8	112.8	138.3		0.0832441	0.100713	0.137445	0.169837	0.00233204	0.00386038	0.208333	0.162545	0.0592226	0.0716904
O95816	FALSE	BAG family molecular chaperone regulator 2 OS=Homo sapiens OX=9606 GN=BAG2 PE=1 SV=1	BAG2		4	3	73.9	72.2	90.2	117.5	9.6	9.4	70.9	91.2	50.1	39.3		4	2	488.9	455.1	34.3	28.4	744.8	620.9															0.0344057	0.031795	0.045866	0.0532156	0.00238166	0.00253759	0.045033	0.0375865	0.0225118	0.0182358
O95819	FALSE	Mitogen-activated protein kinase kinase kinase kinase 4 OS=Homo sapiens OX=9606 GN=MAP4K4 PE=1 SV=2	MAP4K4		5	3	353.5	393.9	257.1	315	9.8	18	431.1	624.2	178.1	200.4		11	2	545.3	494.7	48.3	36.8	940.3	866.7															0.164579	0.173463	0.130733	0.142663	0.00243128	0.00485922	0.273819	0.257254	0.080027	0.0929887
O95831	FALSE	Apoptosis-inducing factor 1, mitochondrial OS=Homo sapiens OX=9606 GN=AIFM1 PE=1 SV=1	AIFM1		108	22	9213.9	9969.4	9762.7	11934.5	485.3	466.6	13141	18459.1	9471.3	8844		238	23	21750.4	20218.1	1502.1	1299.5	72834.5	64616.6		118	19	8469.8	7846.4	5350.5	5193	310.5	235.1	17620.4	18929.8	13587.5	14999.8		4.28972	4.39026	4.96425	5.40512	0.120398	0.125962	8.34667	7.60761	4.25581	4.10375
O95861	FALSE	3'(2'),5'-bisphosphate nucleotidase 1 OS=Homo sapiens OX=9606 GN=BPNT1 PE=1 SV=1	BPNT1		12	6	560.8	628.7	1057.4	1340.1	70.7	73.9	769.3	1088	789.8	768.7		20	6	2027.4	1864.6	189.7	167.8	3761.2	3148.6		16	4	1050.5	907.4	631.6	683.8	67.5	53.8	1874.4	2025	527	552.4		0.261092	0.276863	0.537679	0.606929	0.0175399	0.0199498	0.488631	0.448401	0.354887	0.356689
O95864	TRUE	Fatty acid desaturase 2 OS=Homo sapiens OX=9606 GN=FADS2 PE=1 SV=1	FADS2		13	6	144.4	165.5	708.6	888.7	25	21.2	336.5	504.9	553.2	556.2		14	4	858.7	778.4	61.1	52	2983.5	2617.4		9	3	520.5	464.4	301.1	287.5	14.9	7.4	573.4	585.9	750.5	839.4		0.0672285	0.0728818	0.360317	0.402491	0.00620224	0.00572308	0.213732	0.208086	0.248573	0.258085
O95870	TRUE	Protein ABHD16A OS=Homo sapiens OX=9606 GN=ABHD16A PE=1 SV=3	ABHD16A		7	4	126.2	165.1	474.7	530.5	21.6	17.5	422.2	554.7	494.6	560		10	5	756.7	679	71.2	60.6	2901.6	2666.1															0.0587551	0.0727057	0.241381	0.240263	0.00535874	0.00472424	0.268166	0.22861	0.222242	0.259849
O95881	FALSE	Thioredoxin domain-containing protein 12 OS=Homo sapiens OX=9606 GN=TXNDC12 PE=1 SV=1	TXNDC12		12	2	581.2	642.8	1819.6	2272	93.4	93	803.7	1034	1155.5	970.6		10	2	2428.9	2201.2	171.1	142.4	6954.1	5338.4		13	3	950.6	812.1	869.3	886.6	44.4	44.8	1600.5	1785.3	628.9	696.9		0.27059	0.283072	0.925252	1.02899	0.0231716	0.025106	0.51048	0.426146	0.519209	0.450374
O95905	FALSE	Protein ecdysoneless homolog OS=Homo sapiens OX=9606 GN=ECD PE=1 SV=1	ECD		3	2	22.3	30.4	28.2	40.4			41.8	39.3	14.7	15.4																								0.0103822	0.0133874	0.0143395	0.0182971			0.0265498	0.0161968	0.00660526	0.00714584
O95983	FALSE	Methyl-CpG-binding domain protein 3 OS=Homo sapiens OX=9606 GN=MBD3 PE=1 SV=1	MBD3																								4	2	221.2	186.7	186.9	196.5	5.8	4	436.3	499	146	169.5
O96000	FALSE	NADH dehydrogenase [ubiquinone] 1 beta subcomplex subunit 10 OS=Homo sapiens OX=9606 GN=NDUFB10 PE=1 SV=3	NDUFB10		16	6	322.7	380.5	771.1	994.8	36.8	34.1	811.7	1076.3	608.9	615.4		33	9	1827.9	1507.2	109.9	112.4	10547.2	8956.2		9	4	442.1	445.7	388.7	360	25.2	21.4	732.9	654.2	614.5	666.2		0.15024	0.167562	0.392098	0.450543	0.0091297	0.00920552	0.515561	0.443579	0.273601	0.285555
O96005	TRUE	Cleft lip and palate transmembrane protein 1 OS=Homo sapiens OX=9606 GN=CLPTM1 PE=1 SV=1	CLPTM1		64	15	2154.3	2271.4	4099	5065.4	178.2	211.8	7620	10696.2	4587.5	3742.3		95	16	4784.8	4416.9	418.4	362.8	22378.5	19888		20	5	579.1	484.4	227.1	234.4	6.8	2.5	655.1	692.2	1021.8	1160.1		1.00298	1.00026	2.08431	2.29411	0.0442096	0.0571768	4.83994	4.40826	2.06133	1.73649
O96008	FALSE	Mitochondrial import receptor subunit TOM40 homolog OS=Homo sapiens OX=9606 GN=TOMM40 PE=1 SV=1	TOMM40		85	12	1984.8	2462.7	13413.9	17103.6	492.5	582.5	3724.6	5272.8	12165.7	12980.8		76	9	5718.7	4864.7	384	312	20515.9	18976		60	7	8363.5	7597.6	3264.2	2934.1	175.9	151.1	9005.6	9587.1	7169.5	7956.4		0.924065	1.08451	6.82086	7.7462	0.122184	0.15725	2.36573	2.1731	5.4665	6.02329
O96011	TRUE	Peroxisomal membrane protein 11B OS=Homo sapiens OX=9606 GN=PEX11B PE=1 SV=1	LOC101060567; PEX11B		14	5	298	360.9	2863.9	3123.3	116.4	110.1	559.4	770.6	2348.4	2086.4		14	3	861.8	791.9	52.9	50.3	3018	2941.8		5	2	476.8	420.7	247.1	218.8	17.1	14.5	491.5	398.8	554.6	576.7		0.13874	0.158931	1.45627	1.41454	0.0288776	0.0297222	0.35531	0.31759	1.05522	0.968122
O96017	FALSE	Serine/threonine-protein kinase Chk2 OS=Homo sapiens OX=9606 GN=CHEK2 PE=1 SV=1	CHEK2		2	2
O96019	FALSE	Actin-like protein 6A OS=Homo sapiens OX=9606 GN=ACTL6A PE=1 SV=1	ACTL6A		12	5	413.8	489.9	405.9	474	38.8	35.8	767.7	1128.2	299.2	315.7		25	9	2104.4	1942.3	207	177.6	3174.1	2779.8		12	4	537.1	487.3	425.6	422.4	43.8	33	1037.7	1230.2	292	364.6		0.192653	0.215739	0.206397	0.214674	0.00962588	0.00966444	0.487614	0.464969	0.134442	0.14649
P00167	TRUE	Cytochrome b5 OS=Homo sapiens OX=9606 GN=CYB5A PE=1 SV=2	CYB5A		19	5	346.7	430.2	2137.9	2469.3	107.6	99	1136.8	1426.6	1160.5	1311.5		22	4	1175.8	1002.8	87	66	6573.9	5871.7		29	4	2071.4	1760.3	667.5	647.9	29.4	27.3	2858.5	2791.4	3125.2	3122.5		0.161413	0.189449	1.0871	1.11834	0.0266945	0.0267257	0.722053	0.587949	0.521456	0.608556
P00338	FALSE	L-lactate dehydrogenase A chain OS=Homo sapiens OX=9606 GN=LDHA PE=1 SV=2	LDHA		134	18	11180.5	12694.2	16059.8	22103.2	1226.7	1205.4	13778.3	20036	13824.9	11671.4		249	20	32266.4	30222.8	3161.7	2735.5	114197	88384.7		151	16	16136.6	14142.2	9250.3	9975.5	1257.3	1024.4	27725.1	36557.7	9149.1	10257		5.20532	5.59019	8.16628	10.0105	0.304332	0.325406	8.75146	8.2575	6.21204	5.41571
P00367	FALSE	Glutamate dehydrogenase 1, mitochondrial OS=Homo sapiens OX=9606 GN=GLUD1 PE=1 SV=2	GLUD1		37	14	1831	2046.6	1641.2	1986.2	116.2	105.6	5638.6	7387.5	2313.5	2047.7		70	16	4868.9	4373.2	505.7	419	15618.7	13418		38	13	2017.9	1743.5	1091.2	1077.4	97.5	74.4	3689.2	4207.3	1705.3	1829.1		0.852461	0.901268	0.834537	0.899547	0.028828	0.0285074	3.58143	3.04463	1.03954	0.950165
P00374	FALSE	Dihydrofolate reductase OS=Homo sapiens OX=9606 GN=DHFR PE=1 SV=2	DHFR; DHFRP1		34	9	5143.1	4700.9	686.3	924.5	66.5	56.7	2533	3536.3	859.8	721.3		112	14	43497.2	42361.7	2769.4	2180.3	9081.6	7539		17	4	833.2	788.7	1233.1	963.1	67.2	44.5	786	892.1	488.9	664.5		2.39448	2.07015	0.348978	0.418705	0.016498	0.0153065	1.60887	1.45743	0.38634	0.334694
P00387	FALSE	NADH-cytochrome b5 reductase 3 OS=Homo sapiens OX=9606 GN=CYB5R3 PE=1 SV=3	CYB5R3		48	11	1435.3	1736	4558.4	5104.8	229.9	214.4	2701.9	3616.9	2812.2	2949		84	10	6605.6	5799.1	466.8	336.7	28469.1	28924.1		47	9	3117.2	2674.5	1889.4	1665	132.4	106.5	6285.7	6916	3420.3	3660.1		0.668234	0.764488	2.31791	2.31196	0.0570358	0.0578787	1.71615	1.49064	1.26363	1.36838
P00390	FALSE	Glutathione reductase, mitochondrial OS=Homo sapiens OX=9606 GN=GSR PE=1 SV=2	GSR		14	6	1225.2	1483.4	1391.7	1762.3	97.2	92.2	819.6	1110	776.9	759.5		31	8	5863.1	5592.1	452.2	392.9	3969.3	3375.3		16	6	1077.5	1333.7	1582.9	1382.3	113.4	86.6	1324.1	1242.2	831.2	1135.3		0.570418	0.65325	0.707668	0.798143	0.0241143	0.02489	0.520579	0.457468	0.34909	0.35242
P00395	TRUE	Cytochrome c oxidase subunit 1 OS=Homo sapiens OX=9606 GN=MT-CO1 PE=1 SV=1	COX1		10	2	374.1	389.6	1734.1	2253.3	64.9	63.9	801	1122.1	1407.6	1220.1																								0.17417	0.171569	0.881776	1.02052	0.016101	0.0172502	0.508765	0.462455	0.632487	0.566145
P00403	TRUE	Cytochrome c oxidase subunit 2 OS=Homo sapiens OX=9606 GN=MT-CO2 PE=1 SV=1	COX2		23	4	1257.4	1227.3	4116.2	5006.5	149.5	178.5	2204	3092.8	3193.8	2234.6		34	5	3825.3	3517.9	249.5	204.1	24656.2	20324.6		24	4	3047.3	2733.2	1375.5	1439.9	135	130.1	4832.3	5512	4565.6	4683.4		0.585409	0.54047	2.09305	2.26744	0.0370894	0.0481872	1.3999	1.27465	1.43509	1.03689
P00414	TRUE	Cytochrome c oxidase subunit 3 OS=Homo sapiens OX=9606 GN=MT-CO3 PE=1 SV=2	COX3		11	2	245.2	351.9	878.5	1022.4	44.8	47.6	867.1	1159.5	376.2	578.2		9	2	304.2	271.2	32.9	22.7	943.7	912.6															0.114158	0.154967	0.44671	0.463043	0.0111144	0.0128499	0.550749	0.477868	0.169041	0.268294
P00441	FALSE	Superoxide dismutase [Cu-Zn] OS=Homo sapiens OX=9606 GN=SOD1 PE=1 SV=2	SOD1		33	6	2820.1	7069.4	626.2	724.6	116.1	114	1220.7	1679.7	665.8	752.4		5	2	438.9	305.6	38.4	21.1	269	279		15	4	944.5	1610.1	1036.6	1177.9	105.1	65.1	1030.4	925.7	671.9	754		1.31296	3.11318	0.318418	0.32817	0.0288032	0.030775	0.775343	0.69226	0.299169	0.349125
P00491	FALSE	Purine nucleoside phosphorylase OS=Homo sapiens OX=9606 GN=PNP PE=1 SV=2	PNP		6	2	218.9	240.3	917.8	1124.9	50.8	44.6	283.5	364.9	477.9	393.3		4	2	266.9	213.8	19	16.5	377.7	305.4		4	3	101.1	88.1	100.3	118	4.7	5.6	131.8	147.6	91.2	114.6		0.101913	0.105822	0.466694	0.509466	0.012603	0.0120401	0.180069	0.150387	0.214738	0.182497
P00492	FALSE	Hypoxanthine-guanine phosphoribosyltransferase OS=Homo sapiens OX=9606 GN=HPRT1 PE=1 SV=2	HPRT1		17	7	2038.6	2002.7	3342.3	4229.8	210	206.6	2094.3	2794.1	1927.1	1559.2		30	8	6433.6	5734.5	596	504	11602	8674.4		16	7	2900.3	2407.9	1871.3	2071.9	171.5	149.6	3420.2	4530.1	1478.5	1821.7		0.949113	0.881936	1.69953	1.91567	0.0520988	0.055773	1.33022	1.15154	0.865918	0.723493
P00505	FALSE	Aspartate aminotransferase, mitochondrial OS=Homo sapiens OX=9606 GN=GOT2 PE=1 SV=3	GOT2		46	14	1255.9	1415.6	5374.8	6131.8	307.3	290.1	1504.1	1816	4774.2	3567.7		22	7	2543.8	2088.3	317.3	284.1	4122.5	3552.5		39	13	3204.6	2830.8	2758.7	2460.9	230.4	176.7	5615.7	6341.1	1635.2	1945.6		0.584711	0.623393	2.73304	2.77708	0.076238	0.0783144	0.955348	0.748434	2.14523	1.65547
P00558	FALSE	Phosphoglycerate kinase 1 OS=Homo sapiens OX=9606 GN=PGK1 PE=1 SV=3	PGK1		86	21	4180.3	4565.5	11927.5	15538	746.1	719.8	4024.7	5513.7	11233.7	10730.3		96	17	17935	15882.8	1807.9	1610.2	25225.2	21056.4		126	23	14579.7	13386.1	7296	8278.5	744.8	608.5	26256.5	34630.4	5203.5	6085.4		1.94623	2.01052	6.06504	7.03714	0.1851	0.194315	2.55634	2.27238	5.04772	4.97903
P00568	FALSE	Adenylate kinase isoenzyme 1 OS=Homo sapiens OX=9606 GN=AK1 PE=1 SV=3	AK1																								8	3	157.1	130.9	69.4	66.3	3.3	11.2	257.8	362.5	60.9	70.6
P00813	FALSE	Adenosine deaminase OS=Homo sapiens OX=9606 GN=ADA PE=1 SV=3	ADA															11	5	2058.5	1321.8	97.9	66.3	610.3	521.2
P00846	TRUE	ATP synthase subunit a OS=Homo sapiens OX=9606 GN=MT-ATP6 PE=1 SV=1	ATP6		28	2	411.1	393.2	277	354	12.8	10.6	199.7	236.7	300.7	237.4		30	2	2507.8	2157.2	150.2	117.9	6327.9	4711.2															0.191396	0.173155	0.140852	0.160326	0.00317555	0.00286154	0.126842	0.0975519	0.135116	0.110157
P00918	FALSE	Carbonic anhydrase 2 OS=Homo sapiens OX=9606 GN=CA2 PE=1 SV=2	CA2		3	2	102.2	117.8	171.4	231.1	15.3	12.9	143.5	186.1	139	126.4		12	4	1459.8	1155.8	127.2	103.2	3580.4	3067															0.0475814	0.051876	0.0871555	0.104665	0.00379577	0.00348244	0.0911458	0.076698	0.0624579	0.0586516
P01023	FALSE	Alpha-2-macroglobulin OS=Homo sapiens OX=9606 GN=A2M PE=1 SV=3	A2M		24	5	1672.8	1891.5	276.6	322.2	35	29	1641.6	1884.1	297.4	297.2		14	4	1726	1446.1	94.7	66	3415.1	3236.8		9	3	61.7	54.4	109.8	85.5	16.7	4.2	94	104.7	142.7	167.4		0.778807	0.832966	0.140649	0.145924	0.00868314	0.00782874	1.04268	0.7765	0.133633	0.137905
P01111	FALSE	GTPase NRas OS=Homo sapiens OX=9606 GN=NRAS PE=1 SV=1	NRAS		8	5	306.7	301.5	1408.5	1763	69.3	53.9	682.2	852.4	971.7	784		3	2	685.8	591.3	53.8	43.8	2544	1972.9															0.142791	0.132773	0.716211	0.79846	0.0171926	0.0145507	0.433308	0.351302	0.436621	0.363788
P01116	FALSE	GTPase KRas OS=Homo sapiens OX=9606 GN=KRAS PE=1 SV=1	KRAS																								3	2	423.1	345.5	226.5	224.2	13.7	14.8	953.6	1065.2	402.2	451.3
P01889	TRUE	HLA class I histocompatibility antigen, B-7 alpha chain OS=Homo sapiens OX=9606 GN=HLA-B PE=1 SV=3	HLA-B																								4	3	212.9	182.4	130	155.2	6.7	5.7	254.4	269.1	152	159.8
P01892	TRUE	HLA class I histocompatibility antigen, A-2 alpha chain OS=Homo sapiens OX=9606 GN=HLA-A PE=1 SV=1	HLA-A; LOC100507703															13	2	307.3	324.1	23.1	18.7	749.1	603.9		6	2	341.8	300.8	358.6	330	15.4	6.9	524.5	575.9	476.2	514.6
P02042	FALSE	Hemoglobin subunit delta OS=Homo sapiens OX=9606 GN=HBD PE=1 SV=2	HBD		4	2	40.2	49.5	69.9	84.2	4.5	5.1	40	57.2	122.3	124.4																								0.018716	0.0217985	0.0355436	0.0381341	0.0011164	0.00137678	0.0254065	0.023574	0.0549539	0.0577235
P02533	FALSE	Keratin, type I cytoskeletal 14 OS=Homo sapiens OX=9606 GN=KRT14 PE=1 SV=4	KRT14																								27	4	278.2	263.5	510.4	578.7	970.1	337.9	386	619.4	1335.5	578.9
P02538	FALSE	Keratin, type II cytoskeletal 6A OS=Homo sapiens OX=9606 GN=KRT6A PE=1 SV=3	KRT6A																								28	2	128.7	119.6	258	350.3	965	173.2	142.9	300.3	809.9	317.8
P02545	FALSE	Prelamin-A/C OS=Homo sapiens OX=9606 GN=LMNA PE=1 SV=1	LMNA		17	4	815	1037	552.6	701.7	38.8	38.5	714.3	970.8	315.8	324.8		38	13	4013.9	3720.3	282.9	216	5476.9	4728.8		25	9	803.1	746.1	586.6	482	52.6	23.1	890.8	999.7	451.2	532.4		0.37944	0.456667	0.280993	0.317799	0.00962588	0.0103933	0.453697	0.400099	0.141901	0.150712
P02768	FALSE	Serum albumin OS=Homo sapiens OX=9606 GN=ALB PE=1 SV=2	ALB		22	3	2037.4	1995.5	3311.8	4278.5	233.7	238.6	2416.1	2808.3	4579.5	4023.2		21	3	6426.1	4819.6	4282.5	515.1	5694.4	5179.2		24	3	3938.5	3466.9	1309.9	2002.7	2232.6	148.6	1486.1	1279.8	1915.2	2446.2		0.948554	0.878765	1.68402	1.93773	0.0579786	0.0644116	1.53462	1.15739	2.05774	1.86683
P02786	TRUE	Transferrin receptor protein 1 OS=Homo sapiens OX=9606 GN=TFRC PE=1 SV=2	TFRC		68	22	5333.5	5375	4322.2	5355.9	252.7	241	3774.2	4520.8	3532.6	3341.6		151	30	22167	19267.1	1394.6	1100.7	36576.5	32675.3		53	19	1797.2	1753.1	3398.7	2752.8	172.4	100.4	2787.8	3144.1	4069.5	4841.4		2.48312	2.36701	2.1978	2.42568	0.0626923	0.0650595	2.39723	1.86317	1.58733	1.55055
P03886	TRUE	NADH-ubiquinone oxidoreductase chain 1 OS=Homo sapiens OX=9606 GN=MT-ND1 PE=1 SV=1	ND1		25	3	1406.3	1702.6	4876.1	6430.3	239	237.6	1362.3	2009.3	4504.3	4861.9		13	2	1534	1275.7	81.4	52.2	4765.6	5117.5		25	2	1601	1418.9	1591.3	1448.1	94.2	75.2	2059.4	2253.7	3449.3	3876		0.654733	0.74978	2.47946	2.91227	0.0592934	0.0641417	0.865282	0.828099	2.02395	2.256
P03891	TRUE	NADH-ubiquinone oxidoreductase chain 2 OS=Homo sapiens OX=9606 GN=MT-ND2 PE=1 SV=2	ND2															5	2	495.4	349.7	28.7	25.4	2018.7	1334.6
P03905	TRUE	NADH-ubiquinone oxidoreductase chain 4 OS=Homo sapiens OX=9606 GN=MT-ND4 PE=1 SV=1	ND4		10	3												13	2	129.5	119.4	10.5	2.5	795.9	641.9
P03915	TRUE	NADH-ubiquinone oxidoreductase chain 5 OS=Homo sapiens OX=9606 GN=MT-ND5 PE=1 SV=2	ND5		11	4	171.3	189.9	1033.3	1330.2	52.2	51.1	356.5	535.6	940	744.8		12	3	375	332.1	41.5	43.4	1822.6	1610.6															0.0797523	0.0836269	0.525425	0.602446	0.0129503	0.0137948	0.226435	0.220739	0.422377	0.345599
P04040	FALSE	Catalase OS=Homo sapiens OX=9606 GN=CAT PE=1 SV=3	CAT		6	2	146.4	209.7	541.5	565.5	31.2	18.9	202.4	266.9	290	327.2		7	2	529.9	460.9	73.6	53.2	1032.4	1016.4		4	2	199.1	174.5	146	137	22.5	12.8	263.5	299.4	114.7	112.6		0.0681596	0.0923463	0.275348	0.256114	0.0077404	0.00510218	0.128557	0.109998	0.130308	0.151826
P04062	FALSE	Glucosylceramidase OS=Homo sapiens OX=9606 GN=GBA PE=1 SV=3	GBA		7	4	437	543.7	308.1	377.7	30.6	28.3	588.1	820.6	345.1	340.5		18	7	1147.5	994.4	86	60.5	1840.2	1726.1		13	5	237.5	243.8	1006.9	889.6	43.3	35.6	355	374.5	1156.9	1378.5		0.203455	0.239431	0.156666	0.17106	0.00759155	0.00763977	0.373539	0.338197	0.155066	0.157997
P04066	FALSE	Tissue alpha-L-fucosidase OS=Homo sapiens OX=9606 GN=FUCA1 PE=1 SV=4	FUCA1															11	4	770.1	656.9	53.7	38	1781	1463
P04075	FALSE	Fructose-bisphosphate aldolase A OS=Homo sapiens OX=9606 GN=ALDOA PE=1 SV=2	ALDOA		100	18	4329.9	4654.6	14442.8	18428.3	990.4	877.5	4026.7	5240.4	10647.7	9559.1		129	14	18584.3	15482	2028.9	1862.1	20677.6	17262.5		170	18	17846.8	16913.4	5712.5	6037.4	639.3	508.8	25090.6	31281.9	4145.5	4905.9		2.01588	2.04976	7.34405	8.34615	0.245708	0.236887	2.55761	2.15974	4.78441	4.43557
P04080	FALSE	Cystatin-B OS=Homo sapiens OX=9606 GN=CSTB PE=1 SV=2	CSTB		13	3	439.8	413.3	2949.3	4431.6	163.2	195.9	493.8	563.9	590.9	475.1		5	2	454.1	443.6	49.3	43	922.8	847.5															0.204758	0.182006	1.49969	2.00707	0.0404882	0.0528845	0.313643	0.232402	0.265513	0.220454
P04083	FALSE	Annexin A1 OS=Homo sapiens OX=9606 GN=ANXA1 PE=1 SV=2	ANXA1															15	6	536.2	484.2	27.9	22.8	1642.3	1715.2
P04114	FALSE	Apolipoprotein B-100 OS=Homo sapiens OX=9606 GN=APOB PE=1 SV=2	APOB		5	3	408.5	354	380.3	509.5	16.8	21.2	560.9	642.4	518.1	430.9		5	3	590.9	588.5	38.5	30.1	1332.6	1131.1															0.190186	0.155892	0.193379	0.230752	0.00416791	0.00572308	0.356263	0.264754	0.232802	0.199944
P04179	FALSE	Superoxide dismutase [Mn], mitochondrial OS=Homo sapiens OX=9606 GN=SOD2 PE=1 SV=3			4	2	107.8	125.6	221.5	255	21.7	18.7	139	161.8	148.3	160.4		5	3	174	143	22.5	17.6	280.8	296.4		20	4	2119.1	1741.9	536.4	461.4	74	66.6	2612.5	2963.4	553	597.4		0.0501886	0.0553109	0.112631	0.115489	0.00538355	0.00504819	0.0882876	0.0666832	0.0666367	0.0744281
P04181	FALSE	Ornithine aminotransferase, mitochondrial OS=Homo sapiens OX=9606 GN=OAT PE=1 SV=1	OAT		49	12	1831.1	1843.6	2690.4	3462.1	176.9	175.7	2159.2	2918.8	2654.4	2216.9		52	13	4817.2	4164.5	407.6	354.2	8478.1	7247.5		74	14	2608.1	2313.7	1631.1	1568.8	111.3	89.6	4209.8	4845.9	1182	1369		0.852507	0.811872	1.36805	1.56798	0.0438871	0.0474314	1.37144	1.20293	1.19272	1.02868
P04183	FALSE	Thymidine kinase, cytosolic OS=Homo sapiens OX=9606 GN=TK1 PE=1 SV=2	TK1															6	2	319.4	272.9	22.2	27.4	505.8	386.8
P04264	FALSE	Keratin, type II cytoskeletal 1 OS=Homo sapiens OX=9606 GN=KRT1 PE=1 SV=6	KRT1		44	14	2433.6	2299.5	1147.5	1245	2114	825.2	7537.4	816.1	2053.3	3820.8		102	20	11073.7	4459.1	15754.5	13679.4	8490.9	7102.2		137	25	2625.9	1885.3	8336.9	28640.7	21073.9	4784.5	2835.3	6912.2	13655.9	8354.8		1.13301	1.01264	0.583494	0.563859	0.524462	0.222768	4.78747	0.336342	0.922624	1.77291
P04350	FALSE	Tubulin beta-4A chain OS=Homo sapiens OX=9606 GN=TUBB4A PE=1 SV=2	TUBB4A		317	3	445.7	541	679.2	821.8	45.9	42.1	807	1245.9	388.7	377.6		268	2	651.2	601.5	65.1	61.5	645.2	567.7		155	2	184.6	184.5	359.5	408.2	34.1	30.4	466.1	472.3	703.6	855.4		0.207505	0.238242	0.345368	0.372192	0.0113873	0.0113652	0.512576	0.513477	0.174657	0.175212
P04406	FALSE	Glyceraldehyde-3-phosphate dehydrogenase OS=Homo sapiens OX=9606 GN=GAPDH PE=1 SV=3	GAPDH		78	15	5949.4	6932.7	11073.9	12962.7	1062.7	858	5902.6	7678	8197.5	8291		132	15	24497.2	17774.9	2645.4	2239.4	31623.9	26403.6		197	16	23914	22772.9	11554.1	13639.6	1121	1008.5	29917.2	32958	7873.6	9688.4		2.76987	3.05298	5.63099	5.87079	0.263645	0.231623	3.74911	3.16436	3.68344	3.84715
P04632	FALSE	Calpain small subunit 1 OS=Homo sapiens OX=9606 GN=CAPNS1 PE=1 SV=1	CAPNS1		5	3												5	2								4	2
P04637	FALSE	Cellular tumor antigen p53 OS=Homo sapiens OX=9606 GN=TP53 PE=1 SV=4	TP53		10	5	812	899.3	901.6	1281.4	103.7	107	1104.1	1781.6	613.6	572.9		13	6	1017.2	961.8	131.1	128.3	1429.2	1188.1		8	4	191.9	183.2	481.5	482.8	36.2	29.6	444.5	484.7	393.2	506		0.378044	0.396028	0.458456	0.580344	0.0257269	0.0288853	0.701283	0.734257	0.275713	0.265835
P04792	FALSE	Heat shock protein beta-1 OS=Homo sapiens OX=9606 GN=HSPB1 PE=1 SV=2	HSPB1		3	2												5	4	706.1	545.6	101.3	91.2	1207	1020		3	2	178.6	177.4	214.1	234.8	35.1	8.5	361.3	416.8	506.3	634.4
P04818	FALSE	Thymidylate synthase OS=Homo sapiens OX=9606 GN=TYMS PE=1 SV=3	TYMS															5	3	169.4	169.2	23.5	22.1	268.1	237.1
P04843	TRUE	Dolichyl-diphosphooligosaccharide--protein glycosyltransferase subunit 1 OS=Homo sapiens OX=9606 GN=RPN1 PE=1 SV=1	RPN1		79	23	4114.7	4948.2	6275.7	7688.1	308.4	305.6	5087.3	7127	4506.3	4812.2		146	27	12880.5	11547.9	877.6	693.1	27160.6	24806.3		90	18	5348.4	5381.3	4604.5	4116.9	237.2	184.2	6731.1	7068.4	9290.5	10397.6		1.91569	2.17906	3.19114	3.48193	0.0765109	0.0824987	3.23126	2.93727	2.02485	2.23294
P04844	TRUE	Dolichyl-diphosphooligosaccharide--protein glycosyltransferase subunit 2 OS=Homo sapiens OX=9606 GN=RPN2 PE=1 SV=3	RPN2		34	11	687.3	743.2	1771.2	2132.3	79.9	86.7	622.1	862.8	1476.9	1305.7		37	12	3187.8	2802.3	249.9	199.3	7366.3	6322.6		34	7	2106.2	1950.5	1050.1	969	90.8	65.5	2617.4	3179.4	1293.7	1523.6		0.319987	0.327286	0.900641	0.965716	0.0198224	0.0234052	0.395135	0.355589	0.663626	0.605865
P04899	FALSE	Guanine nucleotide-binding protein G(i) subunit alpha-2 OS=Homo sapiens OX=9606 GN=GNAI2 PE=1 SV=3	GNAI2		10	2	73.2	84.8	121.3	147.8	4.8	7.7	93.1	137.2	84	73.3		11	3	422.5	385.6	39.2	39.9	674.3	653.7															0.0340798	0.0373437	0.0616801	0.0669384	0.00119083	0.00207867	0.0591336	0.0565447	0.0377443	0.0340123
P04920	TRUE	Anion exchange protein 2 OS=Homo sapiens OX=9606 GN=SLC4A2 PE=1 SV=4	SLC4A2		9	4	53.1	65	68.4	93.5			60.5	81.5	48.7	46.9		4	2	73.7	58.6	3.7	3.9	129.4	120.2															0.0247218	0.0286243	0.0347808	0.042346			0.0384273	0.0335889	0.0218827	0.0217623
P05023	TRUE	Sodium/potassium-transporting ATPase subunit alpha-1 OS=Homo sapiens OX=9606 GN=ATP1A1 PE=1 SV=1	ATP1A1		181	35	7681.8	8187.8	25177.4	29973.5	1075	1076.2	13112.4	18322	16166.7	15236.4		271	33	21362.7	19889.6	1450.1	1308.7	71701.3	62716.4		126	30	9051.6	8447.5	7125.6	6666.8	468.2	330.5	12498.5	13725.4	14692	17375.4		3.57642	3.60569	12.8025	13.575	0.266696	0.290527	8.32851	7.5511	7.2643	7.06993
P05026	TRUE	Sodium/potassium-transporting ATPase subunit beta-1 OS=Homo sapiens OX=9606 GN=ATP1B1 PE=1 SV=1	ATP1B1		5	2	69.9	83.3	302.4	333.5	11.7	14	165	191.4	164.9	141.5		2	2								4	2	141.2	139.2	86.5	79.8	4	3.7	203.4	238.5	114.5	123.5		0.0325434	0.0366831	0.153768	0.151042	0.00290265	0.00377939	0.104802	0.0788823	0.0740957	0.0656582
P05067	TRUE	Amyloid-beta A4 protein OS=Homo sapiens OX=9606 GN=APP PE=1 SV=3	APP															16	6	3343.6	2965.1	211.6	154.7	3594.6	3493
P05091	FALSE	Aldehyde dehydrogenase, mitochondrial OS=Homo sapiens OX=9606 GN=ALDH2 PE=1 SV=2	ALDH2		20	5	331.5	351.3	508.1	621.5	44.6	32.4	430.9	547.2	579.5	463.3		47	13	2030.1	1798	222.6	200.3	8062.9	6454.1		49	15	1866.9	1616.7	4474.6	4244.9	238	193.6	2908.9	3262.8	1540	1724.9		0.154337	0.154703	0.258365	0.281476	0.0110648	0.00874659	0.273692	0.225519	0.260391	0.214978
P05141	TRUE	ADP/ATP translocase 2 OS=Homo sapiens OX=9606 GN=SLC25A5 PE=1 SV=7	SLC25A5		428	5	979.8	1143.4	11784.7	14341.1	477.7	522.2	2499.8	3371.6	8026.8	7368.2		409	5	25582.3	22410.9	1625.6	1342.8	138525	121143		305	5	28874.4	24286.5	8308.5	8269.1	499.3	320.9	32008.6	31707.3	29263.4	32296.4		0.456166	0.503523	5.99242	6.49506	0.118512	0.140971	1.58778	1.38955	3.60674	3.41896
P05165	FALSE	Propionyl-CoA carboxylase alpha chain, mitochondrial OS=Homo sapiens OX=9606 GN=PCCA PE=1 SV=4	PCCA		82	28	5554.5	6127.1	5759.1	6224.9	8415.2	7511.3	3927.8	5668.9	7057.6	6338.8		11	4	626.8	605.3	745.5	689.5	675.1	538.6		96	27	5558.5	4830	6862.9	7433.3	10876.9	8512	4824	5265.1	5240.1	5093.3		2.58601	2.69821	2.92846	2.81925	2.08772	2.02772	2.49479	2.33634	3.17124	2.9413
P05198	FALSE	Eukaryotic translation initiation factor 2 subunit 1 OS=Homo sapiens OX=9606 GN=EIF2S1 PE=1 SV=3	EIF2S1		21	9	1898.9	2135.3	1063.8	1302.8	81.4	70.4	1667.7	2171.4	856	821.7		58	14	5451.9	5063.8	424.5	368.4	7345.6	6240.3		20	6	2375.5	2064.6	1650.1	1543.9	134.7	91.9	4977.1	6265.1	1178.7	1280.1		0.884073	0.940329	0.540934	0.590036	0.0201945	0.0190049	1.05926	0.894906	0.384633	0.381282
P05204	FALSE	Non-histone chromosomal protein HMG-17 OS=Homo sapiens OX=9606 GN=HMGN2 PE=1 SV=3	HMGN2																								18	2	1255.1	968.3	400.5	268.6	29.8	19.4	1458.4	1562.8	285.8	289.1
P05386	FALSE	60S acidic ribosomal protein P1 OS=Homo sapiens OX=9606 GN=RPLP1 PE=1 SV=1	RPLP1		71	2	4343.3	5434.4	13539.3	17201.6	771.9	826.5	6386.5	8849	9206.9	9044.8		61	2	8870.8	7690.4	856.4	762.2	17322.4	15815.2		45	2	7629.4	6792.8	3893.5	3862	508.1	309.8	10205.5	12912.5	4482.5	4847.3		2.02211	2.39317	6.88462	7.79058	0.1915	0.223119	4.05647	3.64697	4.137	4.19693
P05387	FALSE	60S acidic ribosomal protein P2 OS=Homo sapiens OX=9606 GN=RPLP2 PE=1 SV=1	RPLP2		19	5	2522.2	2637.2	2627.1	2827.9	174.3	138.6	2149.8	2648.2	2183.7	1810.4		39	6	8362.6	7009.8	659.2	491	13095.2	11707.2		28	5	2862.4	2222.3	1182.6	1137.1	80.5	68.8	3723.5	4772.4	2016.6	2263.7		1.17426	1.16135	1.33586	1.28075	0.043242	0.037416	1.36547	1.09141	0.981218	0.840054
P05388	FALSE	60S acidic ribosomal protein P0 OS=Homo sapiens OX=9606 GN=RPLP0 PE=1 SV=1	RPLP0		96	11	5572	6356	10539.7	12769.4	983.1	909.8	4798	6305.9	7674.5	7727.8		102	11	14552.6	12524.8	1283.2	1096.1	21190.3	19212.6		115	13	8175.3	7635.6	4704.5	4614.5	371.6	311.9	13368.3	17244.9	3873.4	4444		2.59416	2.79901	5.35935	5.78324	0.243897	0.245606	3.04751	2.59887	3.44844	3.58582
P05455	FALSE	Lupus La protein OS=Homo sapiens OX=9606 GN=SSB PE=1 SV=2	SSB		41	16	4795.4	5771	5680.1	7240.2	497.1	421.2	3640.5	4940.1	4685.4	5161.3		82	20	14026.6	11690.2	1236	999.4	14817.1	13036		111	24	14249.3	12746.1	7361.1	7276.3	497.6	430.2	16050.2	21698.8	4810.2	5642.5		2.2326	2.5414	2.88828	3.27908	0.123325	0.113706	2.31231	2.03598	2.10532	2.39492
P05556	TRUE	Integrin beta-1 OS=Homo sapiens OX=9606 GN=ITGB1 PE=1 SV=2	ITGB1		6	4	52.2	54.7	88.4	97.9	7.9	5.3	102.5	130.5	69.1	60.9		12	4	220.9	220.6	21.8	20.5	708.8	550.9		11	4	362.8	348.3	260.5	233.5	27.3	19.8	405.3	442.2	345.5	422		0.0243028	0.0240884	0.0449507	0.0443388	0.00195991	0.00143077	0.0651042	0.0537834	0.0310492	0.0282585
P06132	FALSE	Uroporphyrinogen decarboxylase OS=Homo sapiens OX=9606 GN=UROD PE=1 SV=2	UROD		7	2	198.5	258.5	482.2	525.1	31.7	27.5	269.9	353	311.3	367.7		7	2	551.9	504.1	50.7	42.7	639.8	644.5		11	3	917	861.2	466.8	492.1	43.1	39.2	1364.9	1729.2	323.9	404.5		0.0924158	0.113837	0.245195	0.237817	0.00786444	0.0074238	0.17143	0.145483	0.139879	0.170619
P06280	FALSE	Alpha-galactosidase A OS=Homo sapiens OX=9606 GN=GLA PE=1 SV=1	GLA		73	13	5782.7	6487.2	842.8	952.1	72.2	76.2	7675.8	10157.3	1028.6	989.5		110	15	13384.6	11015.4	827.2	565.7	26779.6	22911		26	7	471.1	490.9	2176.6	2120.9	110.5	93.9	935.7	988.4	1865.5	2391		2.69226	2.85679	0.428557	0.431205	0.0179121	0.0205707	4.87538	4.18616	0.462188	0.459143
P06454	FALSE	Prothymosin alpha OS=Homo sapiens OX=9606 GN=PTMA PE=1 SV=2	PTMA		7	2	353.7	532	466.6	259.2	27.1	10	222.6	270.9	180.4	212.5		20	3	2240.7	1583	157.4	107	2106.1	2349.1		13	2	606.7	634.2	184.3	158.4	12.3	13.3	553.6	689.1	234.9	329.8		0.164672	0.234279	0.237262	0.117391	0.00672323	0.00269957	0.141387	0.111647	0.0810604	0.0986033
P06493	FALSE	Cyclin-dependent kinase 1 OS=Homo sapiens OX=9606 GN=CDK1 PE=1 SV=3	CDK1		27	9	1355.6	1762.7	1629.9	1999	114.6	110.5	2347.9	3365.8	976.9	1230.8		45	10	5849.4	5158.8	459.3	364.5	8611.3	7887.3		36	7	2558.1	2231.9	1207.5	1219.1	128.6	103.5	4150.3	5310.4	1190.3	1359.1		0.631128	0.776246	0.828791	0.905344	0.0284311	0.0298302	1.4913	1.38716	0.438958	0.57111
P06576	FALSE	ATP synthase subunit beta, mitochondrial OS=Homo sapiens OX=9606 GN=ATP5F1B PE=1 SV=3	ATP5B		90	20	5155.7	5958.6	6570	8288.3	388.9	385.2	7176.3	10427.6	5814.5	5878.8		202	24	25602.7	22718.7	1728.8	1374.8	48376.7	43274.9		151	21	13156.4	12930.5	7170	6288.2	361.3	236.8	17714.5	18916.9	7563.3	8885.4		2.40034	2.62401	3.34079	3.75376	0.0964821	0.103987	4.55812	4.29756	2.61267	2.72785
P06730	FALSE	Eukaryotic translation initiation factor 4E OS=Homo sapiens OX=9606 GN=EIF4E PE=1 SV=2	EIF4E		10	3	785.9	793	2024.5	2507.2	128.4	92.9	687.1	909.4	2154.4	1658											6	2	536.3	452.3	419	459.1	46.5	41.2	979.8	1262.4	261.8	313.3		0.365892	0.349216	1.02944	1.13551	0.0318547	0.025079	0.43642	0.374794	0.968052	0.769338
P06733	FALSE	Alpha-enolase OS=Homo sapiens OX=9606 GN=ENO1 PE=1 SV=2	ENO1		190	23	5873.4	6271.7	17939.5	24027.8	1361.7	1311.9	7933.3	11117.2	17123	15580.3		210	21	36865.5	31494.9	4375.2	4098.7	49519.3	40318.1		249	24	22260	21071.4	13875.2	15101.7	1457.9	1183.2	31123.8	41438.4	8821.7	10707.9		2.73448	2.76189	9.12209	10.8822	0.337824	0.354156	5.03894	4.58177	7.694	7.2295
P06737	FALSE	Glycogen phosphorylase, liver form OS=Homo sapiens OX=9606 GN=PYGL PE=1 SV=4	PYGL		12	8	133	162.2	145.6	171.5	10.9	10.9	130.3	171.9	113.5	112.1		39	17	3758.9	3700.3	297.1	254.3	4800.7	4119.1		40	16	757.1	737.3	631.6	711.3	50.5	49.2	1209.5	1432.5	438.3	527.7		0.0619209	0.0714286	0.0740364	0.0776721	0.00270418	0.00294253	0.0827617	0.0708457	0.0509998	0.0520161
P06744	FALSE	Glucose-6-phosphate isomerase OS=Homo sapiens OX=9606 GN=GPI PE=1 SV=4	GPI		49	16	1834.8	2005.1	5207.5	6676.4	309.8	310.5	1408.2	1815.1	7560.8	5276.5		25	9	3128	2493.3	294.3	244	4581.4	3686.5		62	16	6230.4	5774.2	3555	3975.6	270.1	235.1	7912.9	10782.1	2605.3	3216.7		0.85423	0.882993	2.64797	3.02373	0.0768582	0.0838215	0.894436	0.748063	3.39735	2.44838
P06748	FALSE	Nucleophosmin OS=Homo sapiens OX=9606 GN=NPM1 PE=1 SV=2	NPM1		134	16	15301.9	15220.5	14540.8	17291.1	1137.7	1043.9	12699	17222.2	10796.1	8784		313	17	51524.3	47787.1	4112.6	3601	65548.4	56867		220	16	15548.3	13850.3	22261.7	21031.3	1435.4	1242	24993.7	29034.8	19247.6	20966.1		7.12412	6.7027	7.39388	7.83111	0.282252	0.281808	8.06593	7.09784	4.85109	4.07591
P06753	FALSE	Tropomyosin alpha-3 chain OS=Homo sapiens OX=9606 GN=TPM3 PE=1 SV=2	TPM3		42	2	319.8	339.4	165.9	207.1		8.1	332	428.4	107.4	99.8																								0.14889	0.149463	0.0843588	0.0937953		0.00218665	0.210874	0.176558	0.0482588	0.0463088
P06753-2	FALSE	Isoform 2 of Tropomyosin alpha-3 chain OS=Homo sapiens OX=9606 GN=TPM3	TPM3		75	9	11938.7	12427.1	4072.6	5302.5	298.2	303.9	6779.4	9001.5	3352.1	2762.4		148	9	28543.2	25264.2	1827.7	1333.3	35128.4	28962.6		90	9	6860	6029.4	4591.3	4432.8	280.8	233.9	7615.5	9068.8	3730.3	4189		5.55831	5.47256	2.07088	2.40149	0.0739804	0.0820398	4.30602	3.70982	1.50622	1.2818
P06865	FALSE	Beta-hexosaminidase subunit alpha OS=Homo sapiens OX=9606 GN=HEXA PE=1 SV=2	HEXA		58	17	7339.5	8726.7	898.7	1062.2	54.1	39.4	7245	10041.9	966.4	986.8		123	18	17277.2	14123.2	979.2	705.3	34380.7	30093.2		23	8	557.1	522.6	1962.9	1865.3	104.5	80.6	1104.2	1245.8	1798.7	2173.4		3.41706	3.84301	0.456982	0.481069	0.0134217	0.0106363	4.60175	4.1386	0.434239	0.457891
P07099	TRUE	Epoxide hydrolase 1 OS=Homo sapiens OX=9606 GN=EPHX1 PE=1 SV=1	EPHX1		54	15	1822.1	1988.4	3791.2	4852.9	156.1	182.3	2955.6	4041.5	4821.4	4427.6		61	14	6342.6	5812.6	397.3	300.7	18945.1	15629.5		55	15	3441.7	2994.3	4276	4208.2	179	140.6	3527.1	3742	6796.8	7229.8		0.848317	0.875639	1.92779	2.19787	0.0387268	0.0492131	1.87729	1.66564	2.16643	2.05448
P07195	FALSE	L-lactate dehydrogenase B chain OS=Homo sapiens OX=9606 GN=LDHB PE=1 SV=2	LDHB		159	17	14667.5	16559.4	22042.6	29813.4	1701	1617.1	10694.9	14575.6	17199.7	15780.8		239	18	41522.3	38142.4	4233.1	3725.2	79870.5	67299		176	16	18635	16539.6	9896.1	10590.8	1237.9	1003.3	32055.4	42017.7	8237.2	9141		6.82876	7.29232	11.2085	13.5024	0.422001	0.436547	6.793	6.00709	7.72847	7.32254
P07196	FALSE	Neurofilament light polypeptide OS=Homo sapiens OX=9606 GN=NEFL PE=1 SV=3	NEFL		10	3	432.4	456.7	220.1	228	16.7	20.9	623.9	775.5	134.7	123.8		66	16	5224.8	4767.9	319	223.9	10060.6	9373.2															0.201313	0.201119	0.111919	0.103261	0.0041431	0.00564209	0.396278	0.319609	0.0605257	0.0574451
P07197	FALSE	Neurofilament medium polypeptide OS=Homo sapiens OX=9606 GN=NEFM PE=1 SV=3	NEFM		15	7	434.4	444.6	152.2	180.2	6	9.1	563.2	819	151.4	131.8		139	31	12439.5	11543.7	843.1	673.2	30847.3	25022		9	2												0.202244	0.19579	0.0773925	0.0816123	0.00148854	0.0024566	0.357724	0.337537	0.0680297	0.0611573
P07237	FALSE	Protein disulfide-isomerase OS=Homo sapiens OX=9606 GN=P4HB PE=1 SV=3	P4HB		88	23	7795.2	7982.7	12577.8	16010.3	649.1	644.2	9678.3	13689.4	11966.3	10877.7		169	29	24626.8	22767	1765.3	1480.6	70609.2	61604.7		122	25	14706.7	12961.6	9703.1	9664.3	578.9	459.2	19852.3	22318.4	11828.2	13004.6		3.62922	3.51537	6.39571	7.25104	0.161035	0.173906	6.14729	5.64186	5.3769	5.04742
P07305	FALSE	Histone H1.0 OS=Homo sapiens OX=9606 GN=H1F0 PE=1 SV=3	H1F0															7	2	1389.2	1369.5	443.2	414.4	1329.1	1134.7		6	3	384.9	615	711.8	375.6	54.6	57.7	499.7	472.7	281.2	355.7
P07339	FALSE	Cathepsin D OS=Homo sapiens OX=9606 GN=CTSD PE=1 SV=1	CTSD		182	16	48268.2	49181.4	2256.7	2682.7	145.7	155.9	19172.5	24868.7	5724	5037.8		615	16	103814	102118	6031.8	4684.9	115289	90203.4		130	12	1910.5	1883.4	32461.8	35948	1153.1	1165.3	2933.1	3249.8	27128.3	30705.3		22.4723	21.6582	1.14751	1.21499	0.0361467	0.0420862	12.1777	10.2492	2.57201	2.33762
P07355	FALSE	Annexin A2 OS=Homo sapiens OX=9606 GN=ANXA2 PE=1 SV=2	ANXA2		40	15	1583.4	1817.3	2326.6	2917.8	136.4	122.1	1972.5	2676.4	1554.4	1621.1		70	16	6009.6	5186.6	432.3	365.2	9531.8	8667.4		40	12	1786.7	1701.1	1455.9	1311.7	148.1	65	3262.1	3593.6	1262.7	1494		0.737185	0.800291	1.18306	1.32147	0.0338394	0.0329617	1.25286	1.10303	0.69845	0.752216
P07384	FALSE	Calpain-1 catalytic subunit OS=Homo sapiens OX=9606 GN=CAPN1 PE=1 SV=1	CAPN1																								5	4	171	157.1	172	208.9	17.3	10.3	352.5	413.4	117.2	142
P07437	FALSE	Tubulin beta chain OS=Homo sapiens OX=9606 GN=TUBB PE=1 SV=2	TUBB		543	4	6822	8736.8	11639.3	15343.9	588.7	614	18137.5	28542.4	5513	5441.5		416	4	14563.3	13658.5	1322.9	1126.4	18682	15127.1		257	4	2766.8	2649.6	6069.8	6305.8	407.5	344.9	7019.6	7712	12701.5	15413.6		3.17613	3.84745	5.91849	6.94923	0.14605	0.165753	11.5203	11.7633	2.4772	2.52494
P07477	FALSE	Trypsin-1 OS=Homo sapiens OX=9606 GN=PRSS1 PE=1 SV=1	PRSS1															23	2	448.2	485.2	355.6	348.3	600.8	419.9		8	2	132	136.4	130.9	131	98.2	93.4	159.2	143.8	109.9	129.5
P07602	FALSE	Prosaposin OS=Homo sapiens OX=9606 GN=PSAP PE=1 SV=2	PSAP		43	11	7663.4	8667.2	868.4	1095.9	51.5	41.3	6880.8	8384.6	974.1	895.4		72	13	6079.3	5970.8	312.1	229.2	23464	20902.3		32	8	378.6	310.1	2868.6	3944.3	46.7	111.7	463	467	5733.5	6192.5		3.56786	3.8168	0.441574	0.496332	0.0127766	0.0111492	4.37043	3.45557	0.437699	0.41548
P07686	FALSE	Beta-hexosaminidase subunit beta OS=Homo sapiens OX=9606 GN=HEXB PE=1 SV=3	HEXB		19	7	2163	2723.6	269.2	271.7	27.1	24.5	2366.8	3010.4	331.4	385.5		105	15	8693.9	7084.9	672.9	543.5	18981.4	16385.7		25	11	590	546.1	1280	1292.2	93.6	68.1	945.3	1097.6	1286.8	1523.8		1.00703	1.1994	0.136886	0.123053	0.00672323	0.00661394	1.5033	1.24069	0.14891	0.178878
P07711	FALSE	Cathepsin L1 OS=Homo sapiens OX=9606 GN=CTSL PE=1 SV=2	CTSL; CTSL1		3	2	199.6	245.9	15.5	21.2	3.5		397.6	463.8	37.7	34.3		12	3	2687.6	2147	151	102.3	8305.1	7346.5															0.092928	0.108288	0.00788162	0.00960145	0.000868314		0.252541	0.191147	0.01694	0.0159157
P07737	FALSE	Profilin-1 OS=Homo sapiens OX=9606 GN=PFN1 PE=1 SV=2	PFN1		64	10	6676.6	6671	3422.7	4354	449.3	465.1	11312.6	14218.6	3445.8	2732.1		134	10	27572.7	27009.6	2055	1707.8	43642.8	31143.9		52	8	4862.9	4046.3	2987.6	3507.9	718.7	602.1	8101.4	10347.6	2346.9	2630.7		3.10843	2.93773	1.74041	1.97192	0.111467	0.125557	7.18534	5.85996	1.54833	1.26774
P07741	FALSE	Adenine phosphoribosyltransferase OS=Homo sapiens OX=9606 GN=APRT PE=1 SV=2	APRT		23	9	981.6	1071.1	2165.4	2780	169.9	162.7	1024.4	1365.8	1573	1492.6		21	7	2678.4	2289.3	227.3	215	3953.7	3232.4		19	8	1222.6	1089	637	649.9	75.3	58.4	2528.1	3528.7	602.5	713.6		0.457005	0.471684	1.10109	1.25906	0.0421504	0.0439219	0.650661	0.562892	0.706807	0.69259
P07814	FALSE	Bifunctional glutamate/proline--tRNA ligase OS=Homo sapiens OX=9606 GN=EPRS PE=1 SV=5	EPRS		70	29	6116.4	6982.5	4494.5	5587.4	392	352.9	5187.2	7180.2	3557.9	3599.2		118	28	15597.6	14542.8	1290.1	1120.4	17951.3	15376.5		122	36	9690.7	10041.1	6492.6	6730.1	473.4	415.2	9226.8	11412.1	3293.9	3947.4		2.84762	3.07491	2.28542	2.53053	0.0972512	0.0952677	3.29472	2.9592	1.5987	1.67008
P07858	FALSE	Cathepsin B OS=Homo sapiens OX=9606 GN=CTSB PE=1 SV=3	CTSB		13	4	593.1	661	392.3	396.1	9.3	35.6	934	1106	258.8	232.1		70	7	4386.8	3755.4	289.8	210.6	11093	9644.9		4	2	81.8	75.2	91.2	86.7	4.7	4.7	110.7	89.6	100.8	104.9		0.27613	0.291087	0.199481	0.179393	0.00230723	0.00961045	0.593242	0.455819	0.116288	0.107698
P07900	FALSE	Heat shock protein HSP 90-alpha OS=Homo sapiens OX=9606 GN=HSP90AA1 PE=1 SV=5	HSP90AA1		288	27	22854.3	24284.6	20654.8	26357.8	1375.6	1308.8	44728.9	62682.9	19763.5	17173		624	26	76037	68869.3	5336.1	4562.7	169220	135607		331	23	14714.2	14152.2	6877	7350.4	483.3	412.8	14999.5	20657.5	6257.1	7407.2		10.6403	10.6943	10.5028	11.9374	0.341272	0.353319	28.4101	25.8337	8.88048	7.96854
P07910-2	FALSE	Isoform C1 of Heterogeneous nuclear ribonucleoproteins C1/C2 OS=Homo sapiens OX=9606 GN=HNRNPC	HNRNPC		88	15	9766.5	9758.3	4079.9	5098.4	332.4	287.3	16897.7	22443.8	4098.6	3367.6																								4.547	4.2973	2.0746	2.30906	0.082465	0.0775585	10.7328	9.24984	1.84165	1.56262
P07919	FALSE	Cytochrome b-c1 complex subunit 6, mitochondrial OS=Homo sapiens OX=9606 GN=UQCRH PE=1 SV=2	UQCRH		9	3	282	280.4	632.2	781.6	41.9	41	322.1	441	670.8	443.6		18	2	997.6	866.2	102.5	96.3	2330.5	1922.7		13	2	728.6	551.1	305.6	332.2	32.1	26.6	1034.9	1090.8	488.3	462		0.131291	0.123481	0.321469	0.353986	0.010395	0.0110682	0.204586	0.181751	0.301415	0.205837
P07954	FALSE	Fumarate hydratase, mitochondrial OS=Homo sapiens OX=9606 GN=FH PE=1 SV=3	FH		12	5	586.1	731.2	1838.7	2027.6	97.7	100.7	652.9	844	1015.3	1094.1		15	6	1319	1055.5	103.1	86.5	1715.2	1637.9		42	9	4051.5	3522	1665	1574.6	112.2	89.3	5906.8	6979.7	1231.4	1400.4		0.272871	0.322001	0.934964	0.918297	0.0242384	0.0271846	0.414698	0.34784	0.456212	0.507679
P08133	FALSE	Annexin A6 OS=Homo sapiens OX=9606 GN=ANXA6 PE=1 SV=3	ANXA6		59	23	3621.4	4548.6	6212.9	7669	474.3	415.1	3282.2	4893.5	4355.9	5343.3		117	31	15824.6	14269	1372.1	1227.8	24208.1	22079		106	24	7486.2	7281.3	5184.1	4509.5	438.8	330.9	12870.1	13639.6	5733.8	6801.9		1.68602	2.00308	3.15921	3.47328	0.117669	0.112059	2.08473	2.01677	1.95727	2.47937
P08183	TRUE	Multidrug resistance protein 1 OS=Homo sapiens OX=9606 GN=ABCB1 PE=1 SV=3	ABCB1		6	4	100.8	109.7	84.2	119.4	11.2	10.6	80.1	106	96.4	83.8		6	3	505.2	489	42.8	36	1017.5	996.7		3	2	112.8	120.5	118.5	122.3	16.9	9.6	153.3	145.7	347.2	435.5		0.0469296	0.048309	0.042815	0.0540761	0.0027786	0.00286154	0.0508765	0.0436861	0.0433161	0.0388845
P08195	TRUE	4F2 cell-surface antigen heavy chain OS=Homo sapiens OX=9606 GN=SLC3A2 PE=1 SV=3	SLC3A2		39	11	2214.2	2659.9	4230.1	5195.2	156.9	175.9	2139.5	2812.8	2359.2	2705.7		39	10	4570.7	4110.9	328.9	290	8926.8	8480		46	12	4647	4375	2888.6	2603.9	142.6	119.1	5187.8	5892.2	4340.8	4801.7		1.03087	1.17135	2.15097	2.3529	0.0389253	0.0474854	1.35893	1.15925	1.06008	1.25549
P08236	FALSE	Beta-glucuronidase OS=Homo sapiens OX=9606 GN=GUSB PE=1 SV=2	GUSB															5	2	577.3	456.1	33.8	21.4	1100.2	1083.1
P08237	FALSE	ATP-dependent 6-phosphofructokinase, muscle type OS=Homo sapiens OX=9606 GN=PFKM PE=1 SV=2	PFKM		18	8	505.5	636.7	787.1	967	78.7	66.8	822.5	1143.5	609.7	642.1		36	11	2576.9	2317.8	199.2	191.6	4372.8	3952.7		17	6	970.1	906.9	753.5	744.1	55.8	53	1265.8	1690	581.1	663.6		0.235346	0.280386	0.400234	0.437953	0.0195247	0.0180331	0.522421	0.471274	0.273961	0.297944
P08238	FALSE	Heat shock protein HSP 90-beta OS=Homo sapiens OX=9606 GN=HSP90AB1 PE=1 SV=4	HSP90AB1		310	21	10956.7	12157.7	10270.6	13294.3	732.4	770.1	15858.1	22514.6	8539.3	8391.1		635	25	38848.8	35037.8	2768.8	2395.2	74962	60758.1		391	25	45031.3	43955.8	20783.7	21830.4	1325.2	1321	46701.6	64353.9	17994.7	21845.2		5.10112	5.35393	5.22252	6.02097	0.181701	0.207894	10.0725	9.27901	3.83703	3.8936
P08240	FALSE	Signal recognition particle receptor subunit alpha OS=Homo sapiens OX=9606 GN=SRPRA PE=1 SV=2	SRPR; SRPRA		11	7	131.3	156.6	283.4	346.4	20.1	12.5	176.4	242.8	175.9	198.9		20	7	2482.3	2168.7	196.2	158.6	4143	3874.6		8	5	571.8	511.5	519.6	477.2	34.8	19.9	958.4	933.5	463.6	506		0.0611295	0.0689625	0.144107	0.156884	0.0049866	0.00337446	0.112043	0.100066	0.0790384	0.0922927
P08243	FALSE	Asparagine synthetase [glutamine-hydrolyzing] OS=Homo sapiens OX=9606 GN=ASNS PE=1 SV=4	ASNS		56	17	2622.8	3308.6	4537.5	4940.5	292.9	272.4	2469	3861.4	2206.5	2193.9		87	22	11023	10833.2	831.1	706.4	10521.9	8735.8		59	14	2284.6	2141.8	2217	2516.2	156.7	139.3	2681.6	3576.6	1454.2	1627.7		1.2211	1.45702	2.30728	2.23755	0.0726655	0.0735362	1.56822	1.59141	0.991463	1.018
P08397	FALSE	Porphobilinogen deaminase OS=Homo sapiens OX=9606 GN=HMBS PE=1 SV=2	HMBS		12	4	670.4	916.2	1027.2	1350.9	169.2	221.7	439.9	728.7	592.1	701.7		8	4	769.8	671.7	70.3	57	823.7	904		5	3	177	167.6	142.7	163.2	14	11.6	248.4	306.1	97	106.7		0.312119	0.40347	0.522323	0.611821	0.0419768	0.0598494	0.279408	0.300321	0.266053	0.3256
P08559	FALSE	Pyruvate dehydrogenase E1 component subunit alpha, somatic form, mitochondrial OS=Homo sapiens OX=9606 GN=PDHA1 PE=1 SV=3	PDHA1		19	9	534.2	573.5	1081.3	1305.1	84.3	63.2	690.7	912.8	876.1	837		15	5	1407.7	1218.9	131.3	121.5	2067.4	1735.8		47	11	1858.3	1652.4	1297.7	1194.7	108	79.6	3864.6	4302.3	817.4	976.4		0.248708	0.252554	0.549832	0.591078	0.020914	0.0170613	0.438707	0.376195	0.393664	0.388381
P08574	TRUE	Cytochrome c1, heme protein, mitochondrial OS=Homo sapiens OX=9606 GN=CYC1 PE=1 SV=3	CYC1		41	7	998.9	1182.2	5787.4	7412	168.8	250.8	2222.6	2993.6	4509.8	4269.5		64	7	3432.9	2865.8	235.9	184.3	14625.5	13958.4		28	6	1422.6	1226.9	510.7	462.6	19.7	8.6	2351.2	2669	1190.2	1309.5		0.465059	0.520609	2.94285	3.35688	0.0418775	0.0677051	1.41171	1.23376	2.02642	1.98111
P08621	FALSE	U1 small nuclear ribonucleoprotein 70 kDa OS=Homo sapiens OX=9606 GN=SNRNP70 PE=1 SV=2	SNRNP70		12	6	1235.8	1290.4	761.7	722.3	161	133.1	1052.8	1359.4	506.6	456.6		34	9	4490.7	3816.2	501.4	410.7	5370.7	4653.4		29	8	2927.7	3050.9	1514.5	1405.8	274	243.2	2449.9	2647.3	1092.6	1187.2		0.575353	0.568258	0.387318	0.327129	0.0399424	0.0359312	0.668699	0.560254	0.227634	0.21187
P08670	FALSE	Vimentin OS=Homo sapiens OX=9606 GN=VIM PE=1 SV=4	VIM		235	35	36229.4	35623.2	6215.9	7496	539.5	470.7	36850.7	49873.2	6612.1	5840.9		697	36	77036.9	73180.2	5098.3	4140.9	168796	144966		218	32	15908.5	15258.2	13842.5	13519.2	1017.9	613.5	23600.4	26456.7	16448.5	18716.7		16.8674	15.6875	3.16073	3.39493	0.133844	0.127069	23.4062	20.5544	2.97106	2.71027
P08708	FALSE	40S ribosomal protein S17 OS=Homo sapiens OX=9606 GN=RPS17 PE=1 SV=2	RPS17; RPS17L		28	5	2159	2069.8	2827.3	3731.2	221.4	220.2	1493.7	1958.8	2619.7	2047.7		70	7	9162.2	7382.1	1273.3	1005	9428.9	7477.7		33	6	1917.2	1716.5	1003.3	882.9	87.7	89.1	4130.4	4583.7	862.3	1115.4		1.00517	0.911485	1.43766	1.68986	0.0549271	0.0594444	0.948742	0.807287	1.17713	0.950165
P08754	FALSE	Guanine nucleotide-binding protein G(k) subunit alpha OS=Homo sapiens OX=9606 GN=GNAI3 PE=1 SV=3	GNAI3		12	3	549.5	689.4	808.8	1283.1	45.7	52.6	737.4	982.2	506.9	604.5											8	2	349.4	299.8	280.7	276.9	19.2	11.9	740.9	850.6	251	280.3		0.255831	0.303593	0.411268	0.581114	0.0113377	0.0141997	0.468369	0.404797	0.227769	0.280497
P08758	FALSE	Annexin A5 OS=Homo sapiens OX=9606 GN=ANXA5 PE=1 SV=2	ANXA5		60	16	2651.2	2866.6	4800.9	6159.3	275.3	260.9	2018	2599.9	2609	2990		66	14	8024.4	6451.6	643.2	492.9	10781.4	9283.8		83	16	5157.3	5248.6	2650.6	2484.1	239.2	204.9	9259.1	11796.1	2580.2	3140.4		1.23432	1.26237	2.44122	2.78954	0.0682991	0.0704317	1.28176	1.07151	1.17232	1.38741
P08865	FALSE	40S ribosomal protein SA OS=Homo sapiens OX=9606 GN=RPSA PE=1 SV=4	RPSA		18	7	1496.8	1554.5	1370.7	1877.8	119.7	114.5	1148.3	1671.2	1072.6	1056.5		36	8	5708.3	4933	511.1	421.2	6846.9	5706.7		29	9	1947.5	1782.3	1536.8	1729.5	91.9	77.2	2714.8	3059.6	983.4	1207.9		0.696867	0.684561	0.69699	0.850453	0.0296963	0.03091	0.729357	0.688757	0.481959	0.490232
P08962	TRUE	CD63 antigen OS=Homo sapiens OX=9606 GN=CD63 PE=1 SV=2	CD63		9	3	677.1	588.2	687.1	882.9	29	27.6	468.9	653.8	892.8	662.5		3	2																					0.315238	0.259028	0.349385	0.399864	0.0071946	0.0074508	0.297828	0.269453	0.401168	0.30741
P09001	FALSE	39S ribosomal protein L3, mitochondrial OS=Homo sapiens OX=9606 GN=MRPL3 PE=1 SV=1	MRPL3		6	3	383.8	517.6	790.4	987.3	50.7	54.6	630.1	855.3	585.1	586.4		9	4	1652.2	1338.9	138.8	114	2957.2	2753.8		8	3	1349.2	1152	869.9	805.7	59.3	42.9	1758	1925.1	623.3	619.8		0.178686	0.227937	0.401912	0.447147	0.0125781	0.0147396	0.400216	0.352498	0.262907	0.272099
P09012	FALSE	U1 small nuclear ribonucleoprotein A OS=Homo sapiens OX=9606 GN=SNRPA PE=1 SV=3	SNRPA		6	3	461.6	519.9	368	448.3	30.7	23.7	515.3	665.9	342.9	306.6		20	7	2293.3	1807.2	146.5	110.7	4077.8	3655.2		8	4	412.4	370.2	380.8	335.9	17.5	13.8	613.8	697.3	234.4	250.9		0.214908	0.22895	0.187125	0.203034	0.00761635	0.00639797	0.327299	0.274439	0.154078	0.142267
P09211	FALSE	Glutathione S-transferase P OS=Homo sapiens OX=9606 GN=GSTP1 PE=1 SV=2	GSTP1		157	10	2119.4	2537.5	54141.6	64579.3	2503.1	2432.8	2271.7	3021.7	11573.6	11171.8		156	8	47113.8	46046.5	3163	2624.7	17388	13876.9		67	7	5502.8	4553.5	5092.5	6490.2	522.5	438	7734.8	10210.6	2252.3	2563.7		0.986731	1.11745	27.5306	29.2479	0.620993	0.65675	1.4429	1.24534	5.20045	5.18389
P09429	FALSE	High mobility group protein B1 OS=Homo sapiens OX=9606 GN=HMGB1 PE=1 SV=3	HMGB1		20	8	1410.3	1754.3	2051.9	2416.9	161.3	138.3	1759.9	2256.4	1258.5	1418.9		43	7	7760.3	6796	714.4	610	10733	8689.3		32	7	4254	3524.8	1842	1923.5	268.1	215.9	4068.6	3919.3	1315.5	1256.7		0.656595	0.772547	1.04337	1.09461	0.0400169	0.037335	1.11782	0.929937	0.565491	0.658392
P09455	FALSE	Retinol-binding protein 1 OS=Homo sapiens OX=9606 GN=RBP1 PE=1 SV=2	RBP1		12	7	211.8	232.9	736.3	831.3	82.8	80	140.5	159.4	258.1	216.3		7	4	71.8	65	3.5	2.8	180.6	153.9															0.0986079	0.102563	0.374403	0.376495	0.0205418	0.0215965	0.0892403	0.065694	0.115974	0.100367
P09493-3	FALSE	Isoform 3 of Tropomyosin alpha-1 chain OS=Homo sapiens OX=9606 GN=TPM1	TPM1															61	2	1130.7	954.7	79.3	49.2	1296.6	1261.1
P09496-2	FALSE	Isoform Non-brain of Clathrin light chain A OS=Homo sapiens OX=9606 GN=CLTA	CLTA		15	2	489	573.3	435.8	495.4	32.4	25.9	494	666.5	288.1	319.8		22	5	1371.1	1245.3	97.7	88.8	2090.2	1870.1		21	4	580.5	465.6	322.8	353.1	35	17.7	1081.9	1372.3	271.7	305.4		0.227664	0.252466	0.221601	0.224366	0.00803811	0.00699187	0.31377	0.274687	0.129454	0.148392
P09525	FALSE	Annexin A4 OS=Homo sapiens OX=9606 GN=ANXA4 PE=1 SV=4	ANXA4															3	2	321.8	278.2	29.5	19.1	479.1	384
P09543	FALSE	2',3'-cyclic-nucleotide 3'-phosphodiesterase OS=Homo sapiens OX=9606 GN=CNP PE=1 SV=2	CNP		27	11	691	795.1	1882.4	2241.8	106.8	87.6	907.9	1152.8	1024.7	1033.7		22	9	773.7	692.5	67.5	57.2	1829.8	1790.3		21	12	507.2	431.3	299.9	243.4	18.2	9.8	1023.9	1131.1	319.7	366.7		0.32171	0.350141	0.957185	1.01531	0.026496	0.0236482	0.576664	0.475107	0.460436	0.479653
P09601	FALSE	Heme oxygenase 1 OS=Homo sapiens OX=9606 GN=HMOX1 PE=1 SV=1	HMOX1		11	2	225.2	324.2	854.6	1176.5	34.1	42	244.3	380.9	492.5	692.7		11	4	967.5	810.2	50.3	35.3	1012.8	1056.3		7	2	196	155.2	161.9	143.4	3.8	3.1	227.3	186.4	444.1	518.7		0.104847	0.142769	0.434557	0.532835	0.00845986	0.0113382	0.15517	0.156982	0.221299	0.321424
P09622	FALSE	Dihydrolipoyl dehydrogenase, mitochondrial OS=Homo sapiens OX=9606 GN=DLD PE=1 SV=2	DLD		34	9	2117.2	2242.9	2321.6	2742.6	160.1	153.9	3072.3	4223.8	1778.3	1626.1		34	7	5023.3	4552.3	493.7	435.6	7854.9	6559.2		45	11	3862.7	3585.4	2784.1	2680.2	204.7	151.9	5896.5	6384.5	2727.6	3037.7		0.985707	0.987714	1.18051	1.24212	0.0397192	0.0415463	1.95141	1.74077	0.799056	0.754536
P09651	FALSE	Heterogeneous nuclear ribonucleoprotein A1 OS=Homo sapiens OX=9606 GN=HNRNPA1 PE=1 SV=5	HNRNPA1		152	13	8968.6	11078.9	5990.7	7578.5	637.2	590.3	16988.8	23694	4240	4990.9											137	10	7954	7191.8	6121.1	5794.4	545.3	474.7	16946.6	19129.5	4819.3	5387.5		4.17552	4.87885	3.04622	3.43229	0.158083	0.159355	10.7907	9.76508	1.90519	2.31586
P09651-2	FALSE	Isoform A1-A of Heterogeneous nuclear ribonucleoprotein A1 OS=Homo sapiens OX=9606 GN=HNRNPA1	HNRNPA1															304	13	19857.6	17980.6	1597.9	1385.4	43505.4	36201.4
P09661	FALSE	U2 small nuclear ribonucleoprotein A' OS=Homo sapiens OX=9606 GN=SNRPA1 PE=1 SV=2	SNRPA1		3	3	162.8	173.5	249.6	301.4	20.6	17	205.1	274.5	159.2	168.2		4	2	785.6	611.3	48.1	37.7	976.9	832.6		5	4	379.5	330.8	243.1	224.2	19.1	8.8	564.8	665.4	227.4	266.7		0.075795	0.0764048	0.12692	0.136504	0.00511065	0.00458926	0.130272	0.113131	0.0715345	0.0780474
P09668	FALSE	Pro-cathepsin H OS=Homo sapiens OX=9606 GN=CTSH PE=1 SV=4	CTSH															7	3	646.1	513	48.6	39.4	1363.7	1347.5
P09669	TRUE	Cytochrome c oxidase subunit 6C OS=Homo sapiens OX=9606 GN=COX6C PE=1 SV=2	COX6C		11	3	118.3	130.4	1806.3	2197.5	71.3	67.3	254.3	303.4	1016.9	994.2		11	3	75.5	52.3	5.2	8.5	271.5	228.8		14	3	1041.3	864.4	711.9	700.2	25.7	21.8	1835.9	1846.9	856.4	946.5		0.0550771	0.0574247	0.918489	0.995245	0.0176888	0.0181681	0.161522	0.125041	0.456931	0.461324
P09874	FALSE	Poly [ADP-ribose] polymerase 1 OS=Homo sapiens OX=9606 GN=PARP1 PE=1 SV=4	PARP1		146	39	11423.4	13216.5	13735.3	17528.7	1508.7	1336.6	11631.7	15318.5	11031.7	11549.3		219	43	34907.6	31317.3	3966.8	3632	43265.9	37923.6		274	49	25701.4	23647.2	21611.3	21076.6	1929.9	1541.1	39109.2	46368.2	10625.4	11765.2		5.3184	5.8202	6.98429	7.93872	0.374293	0.360824	7.38802	6.31326	4.95695	5.35906
P09936	FALSE	Ubiquitin carboxyl-terminal hydrolase isozyme L1 OS=Homo sapiens OX=9606 GN=UCHL1 PE=1 SV=2	UCHL1		26	10	1736.1	1928.7	4227.9	5072.1	276.6	235.4	2130.5	2637	3016.1	2587.9		29	8	3034.8	2681.6	330.1	274.9	4519.1	4093.2		46	10	6234.5	5117.1	2560.4	2743.2	302.7	243.2	7397.7	10027.6	2084.3	2223.2		0.808278	0.849348	2.14985	2.29715	0.0686216	0.0635478	1.35321	1.0868	1.35525	1.20083
P09960	FALSE	Leukotriene A-4 hydrolase OS=Homo sapiens OX=9606 GN=LTA4H PE=1 SV=2	LTA4H		52	18	3464.9	4229.4	3227.4	3886.5	209.6	226.1	3523.8	4891.6	2839.7	2821.7		83	16	8582	7931.5	638.4	572	13942	12520.5		53	14	3602.1	3232	2569.1	2775.3	178.5	121.8	5421.6	6889.3	1920.8	2244		1.61316	1.86252	1.64111	1.76019	0.0519996	0.0610372	2.23819	2.01599	1.27598	1.30931
P09972	FALSE	Fructose-bisphosphate aldolase C OS=Homo sapiens OX=9606 GN=ALDOC PE=1 SV=2	ALDOC		36	2	710.7	894	1978.7	2478.6	137.6	121.2	654	836.2	1328.6	1319.6		29	2	1588.3	1283.4	165.9	138.3	1713	1631.5		56	2	2713.3	2578	894.2	877.4	100	69.4	3909.3	5013.5	696.2	772.5		0.330881	0.393694	1.00615	1.12255	0.0341371	0.0327187	0.415396	0.344626	0.596989	0.612315
P0CG08	TRUE	Golgi pH regulator B OS=Homo sapiens OX=9606 GN=GPR89B PE=1 SV=1	GPR89A; GPR89B		17	5	391.4	464.4	1563.1	1878.3	71.1	65.6	856.3	1204.9	1169.9	1250.4		12	4	492.7	464.6	29.6	28.9	1734.6	1785.3		4	2	148.4	141.9	95.9	81.4	4.4	3.9	181.7	186.6	191.4	258.6		0.182224	0.204509	0.794824	0.850679	0.0176392	0.0177091	0.54389	0.496579	0.52568	0.580205
P0DMV9	FALSE	Heat shock 70 kDa protein 1B OS=Homo sapiens OX=9606 GN=HSPA1B PE=1 SV=1	HSPA1B; HSPA1A		251	31	24627.1	25505.4	19720.4	26715.7	1712.2	1605.3	22186.5	30132.7	20290.7	19012.2		444	32	91147.7	81464	7074.3	6077.6	106789	87352.9		326	29	25454.2	23418.8	17227.4	17151.3	1728	1307.9	38414	46794.8	12741.5	16262.6		11.4657	11.2319	10.0277	12.0995	0.424779	0.433361	14.092	12.4187	9.11737	8.82196
P0DN79	FALSE	Cystathionine beta-synthase-like protein OS=Homo sapiens OX=9606 GN=CBSL PE=1 SV=1	CBS; LOC102724560; CBSL		34	12	1562.4	1833.1	2561.1	3435.4	128.3	136.4	1494.1	2009.1	969.2	915.2		26	8	2077.9	1840.9	162.8	133.6	3628.2	3362		19	8	1071.5	1009.2	850.9	897.4	59.4	46.4	1410.1	1872.7	819.1	968.9		0.727408	0.807249	1.3023	1.55589	0.0318299	0.0368221	0.948996	0.828017	0.435498	0.424667
P0DP25	FALSE	Calmodulin-3 OS=Homo sapiens OX=9606 GN=CALM3 PE=1 SV=1	CALM3; CALM2; CALM1		73	10	2030.8	2821	11462.7	12280.1	476.2	483.6	2938.7	6281.3	15287.2	10441.5		16	5	1528.2	1623.8	112.6	105.3	3795.1	3818.3		60	9	4268.5	4035.1	1679.9	2161.9	149.1	146.1	12675.9	9302.4	4337.2	3619.4		0.945482	1.24229	5.82869	5.56164	0.11814	0.130551	1.86655	2.58873	6.86911	4.84502
P10155	FALSE	60 kDa SS-A/Ro ribonucleoprotein OS=Homo sapiens OX=9606 GN=TROVE2 PE=1 SV=2	TROVE2		19	7	707.1	840.8	1028.7	1270.9	106.5	111.7	1128.1	1478.9	761	829.6		15	5	1591.3	1483.2	137.1	118.7	2445.5	2312.7		26	9	1550.9	1399.3	1100	1203.1	93.4	74.7	2856.7	3227.2	931.6	1162		0.329205	0.370266	0.523086	0.575589	0.0264216	0.0301541	0.716527	0.609504	0.341946	0.384947
P10253	FALSE	Lysosomal alpha-glucosidase OS=Homo sapiens OX=9606 GN=GAA PE=1 SV=4	GAA		18	6	1234.6	1291.4	275	332.4	17.1	14	1236	1424.6	406	312.4		59	12	4853.7	4281.9	284	234.9	9861.3	8214.1		10	4	128.6	120.1	257.6	261.1	21.2	14.2	219.5	232.3	306.1	352.7		0.574794	0.568698	0.139835	0.150543	0.00424233	0.00377939	0.785061	0.587125	0.182431	0.144958
P10321	TRUE	HLA class I histocompatibility antigen, Cw-7 alpha chain OS=Homo sapiens OX=9606 GN=HLA-C PE=1 SV=3	HLA-C		19	3	780	853	1485	1833.9	41.7	63.6	1045.4	1422.4	1112.9	1131.4																								0.363145	0.375639	0.75511	0.830571	0.0103453	0.0171692	0.663999	0.586218	0.500067	0.524987
P10412	FALSE	Histone H1.4 OS=Homo sapiens OX=9606 GN=HIST1H1E PE=1 SV=2	HIST1H1E		46	4	4811.5	5069.5	5576.1	8958.4	1451.6	1222.4	3024.5	2931.1	6160.2	6182.5		196	5	43480.2	36477.8	12249.3	9276.1	35645.7	32940.2		165	5	7113	8368.8	6652.3	3776.8	409.5	334.1	8181	9376.4	2491.8	2899.8		2.24009	2.23247	2.8354	4.05725	0.360127	0.329995	1.92105	1.208	2.76801	2.86878
P10515	FALSE	Dihydrolipoyllysine-residue acetyltransferase component of pyruvate dehydrogenase complex, mitochondrial OS=Homo sapiens OX=9606 GN=DLAT PE=1 SV=3	DLAT		13	4	232.1	303.6	626.9	759.1	36.8	34.6	285.5	398.8	345.8	365.5		29	7	1024.7	888.8	114.9	110.9	2488.9	2500.2		41	9	2087.9	1973.1	1542.3	1352	120.1	95.4	4742.7	4921.1	1166.8	1361.5		0.108059	0.133697	0.318774	0.343795	0.0091297	0.0093405	0.181339	0.164359	0.155381	0.169598
P10599	FALSE	Thioredoxin OS=Homo sapiens OX=9606 GN=TXN PE=1 SV=3	TXN		21	6	2191.5	2155.9	7394	10554.9	573.1	590.4	3111.5	4091.2	3041.6	2420.9		23	4	6646.8	7213.8	1315	1311.3	16455.6	13150.3		24	5	3343.1	2757.2	2004.1	2373.7	503	379.6	4057.7	5157	2009	2038.7		1.0203	0.949401	3.75979	4.7803	0.14218	0.159382	1.97631	1.68612	1.3667	1.12334
P10606	FALSE	Cytochrome c oxidase subunit 5B, mitochondrial OS=Homo sapiens OX=9606 GN=COX5B PE=1 SV=2	COX5B		19	5	1135.6	1385.4	2373.1	2925.8	264.8	241.1	1830.8	2316.4	1679.9	1570		23	5	1932.6	1780.1	220.2	206.4	5413.9	5298.1		37	6	3138.7	2631.4	1615.6	1667.3	228.9	181.1	5421.7	5521.4	2765.9	3026.4		0.528702	0.610093	1.2067	1.32509	0.0656942	0.0650865	1.16286	0.954665	0.754842	0.728504
P10619	FALSE	Lysosomal protective protein OS=Homo sapiens OX=9606 GN=CTSA PE=1 SV=2	CTSA		11	5	1824.2	1783.3	140.3	166.2	9.8	15.2	843.7	1042.8	218.2	199.4		17	5	2695.4	2457.9	139.2	117.9	3682	2756.3															0.849295	0.785318	0.0713414	0.0752717	0.00243128	0.00410334	0.535887	0.429773	0.0980454	0.0925247
P10620	TRUE	Microsomal glutathione S-transferase 1 OS=Homo sapiens OX=9606 GN=MGST1 PE=1 SV=1	MGST1		7	3	307.4	355	4392.2	5320.2	204.4	205.3	981.2	1139.8	2096.3	1976.2		7	3	981.8	798.2	153.3	122.6	5079.7	4020.4															0.143117	0.156333	2.2334	2.40951	0.0507095	0.0554221	0.623222	0.469749	0.941946	0.916988
P10644	FALSE	cAMP-dependent protein kinase type I-alpha regulatory subunit OS=Homo sapiens OX=9606 GN=PRKAR1A PE=1 SV=1	PRKAR1A		10	6	124.6	142.3	124.1	149.7	8.6	11	167.1	254.7	114.6	93.8		23	7	1813.7	1665	118.5	99.4	3027.1	2533.1															0.0580101	0.0626651	0.0631038	0.0677989	0.00213357	0.00296952	0.106136	0.10497	0.051494	0.0435247
P10768	FALSE	S-formylglutathione hydrolase OS=Homo sapiens OX=9606 GN=ESD PE=1 SV=2	ESD		17	5	453	566.6	1693.4	2133.4	111.9	86.9	645.9	793	1220.4	1287.8		8	3	1135.6	939	130.1	129.5	1785.4	1708.1		23	7	1372.9	1380.6	999	1270.3	101.4	85.8	1898	1511.9	480.7	599.5		0.210904	0.249516	0.86108	0.966214	0.0277612	0.0234592	0.410252	0.326822	0.548371	0.597559
P10809	FALSE	60 kDa heat shock protein, mitochondrial OS=Homo sapiens OX=9606 GN=HSPD1 PE=1 SV=2	HSPD1		226	35	12713.8	13307.1	24920	30982.4	1582.1	1492.5	13943.9	20459.8	24026.5	22509.1		315	34	37236.2	33209.4	2676	2367.8	68900.6	56988		458	41	45215.7	43762.6	17387.3	17482.4	1115.3	889.6	63696.1	72535	14021.7	16127.2		5.91918	5.86009	12.6716	14.0319	0.392503	0.40291	8.85664	8.43216	10.796	10.4446
P11021	FALSE	Endoplasmic reticulum chaperone BiP OS=Homo sapiens OX=9606 GN=HSPA5 PE=1 SV=2	HSPA5		96	24	11796.9	12046.9	4075.9	4861.8	302.8	280.5	9701.6	12921.4	4481	4004.2		146	26	22883.9	20770.3	1605	1333.1	26008.7	21945.4		139	27	14107.3	12772.7	6843.4	6239.3	430.1	333	14711.9	16551.7	5339.4	6363.6		5.49229	5.30513	2.07256	2.2019	0.0751216	0.0757228	6.16209	5.32534	2.01348	1.85801
P11117	TRUE	Lysosomal acid phosphatase OS=Homo sapiens OX=9606 GN=ACP2 PE=1 SV=3	ACP2		4	3	112.4	112.8	74.6	75.4	9.7	6.9	89.6	113	60.6	52.3		12	3	513.6	432.5	70.3	58.9	1011.3	981.4															0.0523302	0.0496741	0.0379335	0.0341486	0.00240647	0.0018627	0.0569106	0.0465711	0.0272298	0.024268
P11142	FALSE	Heat shock cognate 71 kDa protein OS=Homo sapiens OX=9606 GN=HSPA8 PE=1 SV=1	HSPA8		204	29	22294.6	22686.2	15518.7	20682.2	1333.5	1219.5	22718.3	31355.1	16127.8	14530.7		409	29	59330.7	50830.3	4319.7	3403.9	88231.2	73916.2		281	28	29382.6	27198.1	18548.4	18253.8	1378.2	1195.9	39715.7	49421.4	14918.3	18245.5		10.3797	9.9904	7.89113	9.36694	0.330828	0.329212	14.4298	12.9225	7.24682	6.74247
P11166	TRUE	Solute carrier family 2, facilitated glucose transporter member 1 OS=Homo sapiens OX=9606 GN=SLC2A1 PE=1 SV=2	SLC2A1		10	5	82	98	213.2	259	8.6	12.2	97	137.1	118.9	124.9																								0.0381768	0.0431566	0.10841	0.117301	0.00213357	0.00329347	0.0616108	0.0565035	0.0534262	0.0579555
P11171	FALSE	Protein 4.1 OS=Homo sapiens OX=9606 GN=EPB41 PE=1 SV=4	EPB41															14	7	779.9	757.6	46.9	49.6	1434.1	1398.5
P11172	FALSE	Uridine 5'-monophosphate synthase OS=Homo sapiens OX=9606 GN=UMPS PE=1 SV=1	UMPS		22	6	764.4	931.9	1585.6	2006.4	107.4	96.1	815.8	1192.8	1160	1386.1		14	3	1788.2	1589.2	182.4	177.8	2173.7	1999.5		22	6	1247.2	1146.1	631.7	619.9	58.9	42.8	1651.8	2068.2	436	531.6		0.355882	0.410384	0.806265	0.908696	0.0266448	0.0259428	0.518166	0.491592	0.521231	0.643172
P11177	FALSE	Pyruvate dehydrogenase E1 component subunit beta, mitochondrial OS=Homo sapiens OX=9606 GN=PDHB PE=1 SV=3	PDHB		21	7	1153.3	1092.9	1695.8	2105.7	127	125	906.6	1231	1640.3	1478.5		65	11	19554.8	18683.7	1186.7	989.8	6285	5098.8		54	11	4254.3	3753	2632.8	2677.2	238.3	208.5	11417.8	12882.6	2185	2580.4		0.536943	0.481284	0.8623	0.953668	0.0315074	0.0337446	0.575838	0.507336	0.737048	0.686047
P11233	FALSE	Ras-related protein Ral-A OS=Homo sapiens OX=9606 GN=RALA PE=1 SV=1	RALA		14	5	452.9	445.5	1005.8	1240.3	31.7	31.6	528.3	537.1	417.5	365.1		21	3	1706.6	1454.3	106.4	78.8	2565.5	2090.1		2	2												0.210857	0.196186	0.511441	0.56173	0.00786444	0.00853063	0.335556	0.221357	0.187598	0.169412
P11234	FALSE	Ras-related protein Ral-B OS=Homo sapiens OX=9606 GN=RALB PE=1 SV=1	RALB															10	2
P11279	TRUE	Lysosome-associated membrane glycoprotein 1 OS=Homo sapiens OX=9606 GN=LAMP1 PE=1 SV=3	LAMP1															29	4	1226.8	1090.4	65	58.6	5133.6	4275.5
P11310	FALSE	Medium-chain specific acyl-CoA dehydrogenase, mitochondrial OS=Homo sapiens OX=9606 GN=ACADM PE=1 SV=1	ACADM															7	3								15	7	334.4	337.1	153	129.4	18.2	11.2	636.2	643.4	128.1	146.3
P11387	FALSE	DNA topoisomerase 1 OS=Homo sapiens OX=9606 GN=TOP1 PE=1 SV=2	TOP1		23	9	1944.7	2343.5	2096.7	2422.9	180.6	166.3	1848.1	2295.2	1551.9	1638.5		32	12	5265.4	4725.9	499.6	425.1	5587.4	5389.7		69	14	5799.1	4951.8	3656.6	3472.2	334.4	289	7897.7	9076.1	2078.9	2075.1		0.905396	1.03202	1.06615	1.09733	0.044805	0.0448938	1.17384	0.945928	0.697326	0.76029
P11388	FALSE	DNA topoisomerase 2-alpha OS=Homo sapiens OX=9606 GN=TOP2A PE=1 SV=3	TOP2A		13	6	1174.1	1314.1	1204.6	1410.2	96.4	72.6	861.6	1089.7	804.3	855.4		23	5	2746.4	2553.7	252.9	215.2	2428.1	2174.1		21	5	540.4	461.4	533.8	524.1	48.6	37.3	943.2	1032.7	358.3	408		0.546627	0.578695	0.612529	0.638678	0.0239158	0.0195988	0.547256	0.449102	0.361402	0.396919
P11413	FALSE	Glucose-6-phosphate 1-dehydrogenase OS=Homo sapiens OX=9606 GN=G6PD PE=1 SV=4	G6PD		37	14	1384.1	1599.4	2106.3	2764.2	142.9	135.6	3128.6	4259	1278.5	1237.5		53	13	4697.2	4407.9	432.2	377.3	10580.4	8991.1		20	8	1229.9	1087.6	917.5	915	93.8	66.5	2278.3	2886.5	635	732.7		0.644397	0.704333	1.07104	1.2519	0.035452	0.0366061	1.98717	1.75528	0.574478	0.574219
P11498	FALSE	Pyruvate carboxylase, mitochondrial OS=Homo sapiens OX=9606 GN=PC PE=1 SV=2	PC		175	40	9272.3	10153.9	8121.9	9040.2	18542.4	15882.9	5983.8	9008.7	10056.4	10102.2		56	19	4583.5	4444.4	6014.4	5683	4231.1	3760.4		195	37	9624.4	8751.7	11899.9	12699	24218.2	19566.9	7574.4	8438	8090	8268		4.31691	4.47151	4.12992	4.09429	4.60018	4.28769	3.80069	3.71278	4.51871	4.68758
P11586	FALSE	C-1-tetrahydrofolate synthase, cytoplasmic OS=Homo sapiens OX=9606 GN=MTHFD1 PE=1 SV=3	MTHFD1		45	14	2766.7	3103.9	3966.3	5033.2	293.1	253.5	2992.5	4225.4	3270.4	3185.6		68	21	7068.8	6689.7	616.2	571.1	9584.9	8036.4		73	22	8291.4	7865.6	3286.4	3563.3	297.4	232.1	8715.2	11589.9	2721.6	3208.5		1.2881	1.36688	2.01683	2.27953	0.0727151	0.068434	1.90072	1.74143	1.46951	1.47817
P11717	TRUE	Cation-independent mannose-6-phosphate receptor OS=Homo sapiens OX=9606 GN=IGF2R PE=1 SV=3	IGF2R		15	3	576	843.2	400.6	459.7	22.2	14.5	468.5	580	233.5	294.5		44	21	2709.4	2430.6	193.4	158.5	3585.2	3218.9		4	2	140.4	149.6	613.4	472.2	28.4	15	202.8	220.4	560.6	625.9		0.268169	0.371323	0.203702	0.208197	0.00550759	0.00391437	0.297574	0.239037	0.10492	0.136653
P11766	FALSE	Alcohol dehydrogenase class-3 OS=Homo sapiens OX=9606 GN=ADH5 PE=1 SV=4	ADH5		17	8	1454.4	1781.2	2810.4	3654	233.6	224.3	1723.1	2320.5	2447.4	2436.8		56	10	11214.2	10219.4	868.3	735	12273.2	10263.1		43	10	3811.3	3347.7	3583.6	3918.9	333.7	296.5	6245.6	8223.7	3644.8	4183.4		0.677126	0.784393	1.42907	1.65489	0.0579538	0.0605513	1.09445	0.956355	1.09971	1.13071
P11802	FALSE	Cyclin-dependent kinase 4 OS=Homo sapiens OX=9606 GN=CDK4 PE=1 SV=2	CDK4		24	8	410.6	503.3	744.2	925.4	27.3	33.4	927.9	1219.3	357.5	410.2		40	8	3958.8	3553.7	304.1	231.5	8831.3	7591		7	2	290.6	261.1	278.3	238	16.3	8.6	468.9	626	241.7	274		0.191163	0.22164	0.37842	0.419112	0.00677285	0.00901655	0.589367	0.502514	0.160638	0.190339
P11940	FALSE	Polyadenylate-binding protein 1 OS=Homo sapiens OX=9606 GN=PABPC1 PE=1 SV=2	PABPC1		88	18	6139.3	6599.4	4973.4	6580.3	372.6	363	8886.1	12009.3	3925.9	3804.2		142	17	21510.5	19712.5	1624.7	1361	38908.7	32759.4		71	12	6996.8	6813	5377.2	5391.8	370.8	318.9	9900.7	11804.2	3502.9	4275.9		2.85828	2.9062	2.52893	2.98021	0.0924382	0.0979942	5.64412	4.94943	1.76405	1.76521
P12004	FALSE	Proliferating cell nuclear antigen OS=Homo sapiens OX=9606 GN=PCNA PE=1 SV=1	PCNA		48	11	1785.9	1953.2	3266.9	4072.9	206.4	190.2	3721.7	5610.4	3438.7	2847.7		178	16	8317.3	7362.9	587.1	521.5	54570.9	45702.5		44	12	1619.9	1571.6	1273.7	1543.8	143	114.4	2334.5	2155	1888.5	2085.2		0.831463	0.860137	1.66119	1.84461	0.0512057	0.0513457	2.36388	2.31223	1.54514	1.32138
P12081	FALSE	Histidine--tRNA ligase, cytoplasmic OS=Homo sapiens OX=9606 GN=HARS PE=1 SV=2	HARS		36	15	3340.8	3770.5	1227.3	1579.7	101	105	2829.4	3757.8	1049.8	1067.5		65	18	8034.4	7321.2	627.9	507.6	12924	11822.1		19	7	786.6	777.8	623.7	686.4	55.5	71.8	1032.8	1307.5	535	678.7		1.55538	1.66043	0.624072	0.715444	0.0250571	0.0283454	1.79713	1.54871	0.471714	0.495337
P12235	TRUE	ADP/ATP translocase 1 OS=Homo sapiens OX=9606 GN=SLC25A4 PE=1 SV=4	SLC25A4		342	2	199.4	205.7	1765.3	2131.1	56.4	57.7	443.9	653.8	1301.4	1077		319	2	396.6	375.5	17.9	16.7	2670.7	2183.1		200	2	564.5	451.5	187.8	170	12.9	7.8	605.5	641.1	655.3	690.7		0.0928349	0.0905848	0.897641	0.965172	0.0139923	0.0155765	0.281949	0.269453	0.584767	0.499745
P12236	TRUE	ADP/ATP translocase 3 OS=Homo sapiens OX=9606 GN=SLC25A6 PE=1 SV=4	SLC25A6		367	4	5263.6	6042.1	59026.5	74358.9	2428.2	2630.3	12528.9	16847.4	39280.7	36570.9		397	2	4445	3925.2	258.7	212	25279.7	24175.7															2.45058	2.66078	30.0145	33.677	0.602411	0.710067	7.95789	6.94337	17.6503	16.9695
P12268	FALSE	Inosine-5'-monophosphate dehydrogenase 2 OS=Homo sapiens OX=9606 GN=IMPDH2 PE=1 SV=2	IMPDH2		81	23	4892	5511.8	4220.4	5035.6	373.5	326.2	6686.6	8888.5	3738.3	3255.8		140	22	17120.4	15766.1	1471	1277.7	32108.6	26407.1		57	16	5459.5	5010.9	3108.3	3309.6	356.3	275.2	5968.9	7259.9	2520.2	2976.5		2.27757	2.42725	2.14604	2.28062	0.0926615	0.0880598	4.24708	3.66325	1.67976	1.51074
P12270	FALSE	Nucleoprotein TPR OS=Homo sapiens OX=9606 GN=TPR PE=1 SV=3	TPR		5	3	317.7	323.6	105.7	120.4	13.3	10.8	233.4	324.4	90.1	93.9		34	17	2520.1	2392.9	186.1	175	3281.3	3053.5		5	2	47.4	54.9	49.3	44.9	4	2	88.9	93.3	37.9	40.2		0.147912	0.142505	0.0537476	0.054529	0.00329959	0.00291553	0.148247	0.133696	0.0404853	0.0435711
P12277	FALSE	Creatine kinase B-type OS=Homo sapiens OX=9606 GN=CKB PE=1 SV=1	CKB		141	21	7496.2	9182	11118.3	13392.5	619.9	618.5	6841	9593.1	9107.1	9196		212	18	21304.2	19567.1	1610.1	1397.3	27243.9	24478.4		158	17	9339.5	8149.7	3883.8	4544.2	307.9	247.7	13749.2	18847.7	3469.9	3928.8		3.49001	4.04351	5.65356	6.06544	0.153791	0.166968	4.34515	3.95364	4.09216	4.26709
P12532	FALSE	Creatine kinase U-type, mitochondrial OS=Homo sapiens OX=9606 GN=CKMT1A PE=1 SV=1	CKMT1B; CKMT1A		14	4	256.1	280.8	532.4	647.2	34.1	33.1	258.7	332.2	472.8	441.2		15	4	439	394.2	46.7	40.8	874	767		17	5	1510.5	1379.4	1048.1	999.3	84.7	57.7	2386.5	2767.5	900.8	1025.6		0.119233	0.123657	0.270721	0.293116	0.00845986	0.00893556	0.164317	0.136911	0.212447	0.204724
P12814	FALSE	Alpha-actinin-1 OS=Homo sapiens OX=9606 GN=ACTN1 PE=1 SV=2	ACTN1		68	11	1361.9	1473.7	755.5	958.5	50.8	43.1	1157.3	1568.3	673.8	628.8		87	15	6080.2	5963	503.6	435.4	8376.7	7166.2		52	10	1036.3	1007	1113.2	1073.9	70	52.7	1428.1	1731.5	865	1007.1		0.634061	0.648978	0.384166	0.434103	0.012603	0.0116351	0.735074	0.646348	0.302763	0.291773
P12955	FALSE	Xaa-Pro dipeptidase OS=Homo sapiens OX=9606 GN=PEPD PE=1 SV=3	PEPD		11	5	695.8	863.3	1264.7	1533.7	67.3	64.5	749	1045.7	599.8	585.4		4	2	850.9	753.3	80	57.6	891.2	813.5		5	3	672.3	611.4	588.8	682.3	43.8	35.9	804.7	1162.4	382.2	456.7		0.323944	0.380174	0.64309	0.694611	0.0166964	0.0174122	0.475737	0.430968	0.269512	0.271635
P12956	FALSE	X-ray repair cross-complementing protein 6 OS=Homo sapiens OX=9606 GN=XRCC6 PE=1 SV=2	XRCC6		215	37	58145.6	57503.5	7801.7	9936.7	578.5	554.2	15746.8	21981.7	9137.7	8052.2		334	35	79817.1	81079.7	5090.2	4308.2	60542.6	51511.9		139	29	11644.3	10466.1	9471.1	9928.7	584.4	531.8	18247.1	23193.7	5507.3	6096.8		27.0709	25.323	3.9671	4.50032	0.14352	0.14961	10.0018	9.05939	4.10591	3.73635
P13010	FALSE	X-ray repair cross-complementing protein 5 OS=Homo sapiens OX=9606 GN=XRCC5 PE=1 SV=3	XRCC5		120	30	11632.6	12446.6	8773.6	10668.7	619.3	646.9	7177.2	10082	7855.5	6870.1		187	29	33167.7	32003.4	2546.1	2244.1	35501.8	30168.3		146	26	12251.1	11641.7	7449.5	7443.5	568.2	477.6	15522.7	19729.4	4318.3	5016.2		5.4158	5.48115	4.4613	4.83184	0.153642	0.174635	4.55869	4.15513	3.52977	3.18783
P13073	TRUE	Cytochrome c oxidase subunit 4 isoform 1, mitochondrial OS=Homo sapiens OX=9606 GN=COX4I1 PE=1 SV=1	COX4I1		46	10	728.9	742.8	2933.8	3727.9	127.7	131.1	2848	3243.6	2084.8	1857.5		93	9	6095.1	4962	329.7	298.6	41409.5	30643.5		45	8	3032.3	2751.7	963.6	950.9	64	42.7	3836.6	3553.3	2551.2	2688.6		0.339355	0.327109	1.49181	1.68836	0.0316811	0.0353913	1.80894	1.3368	0.936778	0.861909
P13473	TRUE	Lysosome-associated membrane glycoprotein 2 OS=Homo sapiens OX=9606 GN=LAMP2 PE=1 SV=2	LAMP2		8	2	245.5	297.4	166	197.7	10.9	12.1	332.6	452	123.6	113		21	3	2879.1	2384.8	175	105.8	4862.3	5143		7	2	115.8	114.8	278.7	238.7	13	9.3	125.5	158.3	483.8	523.6		0.114298	0.130967	0.0844096	0.089538	0.00270418	0.00326647	0.211255	0.186284	0.0555381	0.0524338
P13489	FALSE	Ribonuclease inhibitor OS=Homo sapiens OX=9606 GN=RNH1 PE=1 SV=2	RNH1		10	4	538.5	554.8	575.9	704.5	45.8	55.4	543.2	737.9	578.1	518.5		16	5	1804.1	1674.4	152.4	144.2	2210.8	1916.3		11	5	455.2	444.6	620.4	666.9	61.2	52.3	896.7	1077.2	393.6	411.6		0.25071	0.244319	0.29284	0.319067	0.0113625	0.0149556	0.34502	0.304113	0.259762	0.240592
P13498	FALSE	Cytochrome b-245 light chain OS=Homo sapiens OX=9606 GN=CYBA PE=1 SV=3	CYBA		6	2	23.9	29.8	106.2	123.5	7.3	4.1	59.2	78	86.5	83.1		8	2	109.3	104.8	6.1		520	511.4		5	2	86.7	69.3	46.9	42.7		2	102.9	100.2	104.5	132.2		0.0111271	0.0131231	0.0540018	0.055933	0.00181105	0.00110682	0.0376016	0.0321464	0.0388677	0.0385597
P13639	FALSE	Elongation factor 2 OS=Homo sapiens OX=9606 GN=EEF2 PE=1 SV=4	EEF2		263	39	25589.8	27873.8	25231.2	33453	1679.9	1630.7	19589	27773.6	18940.8	18095.8		515	47	90390.6	85434.5	6811.3	5793.7	105940	94906		301	41	24514.1	24548.3	21750.3	23112.5	1716.2	1300.7	30414.1	36846.2	14787.5	19078.3		11.9139	12.2749	12.8299	15.1508	0.416766	0.440218	12.4422	11.4464	8.51081	8.39673
P13645	FALSE	Keratin, type I cytoskeletal 10 OS=Homo sapiens OX=9606 GN=KRT10 PE=1 SV=6	KRT10		40	11	1150	855.1	804	821.1	863.6	782.5	8369.2	623.9	879.4	3548		58	13	3619.5	1328.6	2329.9	5628.8	2275.7	2863.8		117	20	1040.6	1204.9	7338.1	29841.7	12332.5	2465.1	1994.5	4035.9	4189.2	11114.2		0.535407	0.376563	0.408827	0.371875	0.21425	0.211241	5.3158	0.25713	0.395147	1.64633
P13667	FALSE	Protein disulfide-isomerase A4 OS=Homo sapiens OX=9606 GN=PDIA4 PE=1 SV=2	PDIA4		30	15	1014.6	1159	1774.3	2260.4	120.1	112.6	823.1	1077.6	1041.3	995.5		44	15	2893.6	2405.9	256.2	200.7	3430.3	3249.1		86	23	6012.1	5431.7	4075.3	3722.3	241.4	178.4	6657.9	7735	2613.5	3105.6		0.472368	0.510393	0.902217	1.02373	0.0297956	0.0303971	0.522802	0.444115	0.467895	0.461928
P13674	FALSE	Prolyl 4-hydroxylase subunit alpha-1 OS=Homo sapiens OX=9606 GN=P4HA1 PE=1 SV=2	P4HA1		3	2	265.3	340.5	169.1	196.3	8.7	7.4	614.7	802.2	126.7	124.8											3	2	217.1	187.4	184	163.1	9.9	6.3	349.7	413.5	146.6	153		0.123516	0.149947	0.085986	0.088904	0.00215838	0.00199768	0.390434	0.330613	0.056931	0.0579091
P13674-2	FALSE	Isoform 2 of Prolyl 4-hydroxylase subunit alpha-1 OS=Homo sapiens OX=9606 GN=P4HA1	P4HA1															26	13	1644.2	1570.8	104.1	90.1	4888.8	3834.7
P13693	FALSE	Translationally-controlled tumor protein OS=Homo sapiens OX=9606 GN=TPT1 PE=1 SV=1	TPT1		16	8	910.5	900.8	1375.8	1696.6	77.9	64.4	759.8	1036.1	1129.2	885.4		17	5	5000.9	4274.9	343.1	283	6913.8	5636.2		11	5	594.7	520.1	332.2	307.7	24.4	20.5	1032.1	1493.1	290.1	341.5		0.423902	0.396688	0.699583	0.768388	0.0193262	0.0173852	0.482597	0.427011	0.507392	0.410839
P13797	FALSE	Plastin-3 OS=Homo sapiens OX=9606 GN=PLS3 PE=1 SV=4	PLS3		94	23	8114.4	8660	10357.8	13928.3	663	667.4	8935.2	12222.2	8302.6	7478.1		188	25	27655.9	25919.1	2109	1780.5	46607	38345.3		118	28	13195.9	11979.3	13708.6	14215	846.9	717.9	18805.3	24112.8	6320.5	7400.7		3.77783	3.81363	5.26686	6.30811	0.164483	0.180169	5.6753	5.03717	3.73067	3.46995
P13798	FALSE	Acylamino-acid-releasing enzyme OS=Homo sapiens OX=9606 GN=APEH PE=1 SV=4	APEH		3	2	302.1	276.9	247.2	314.9	20.7	15.6	305.2	389.8	221.7	169.9		13	7	1453.7	1316.9	103.3	93.6	2183.6	2094.5		4	3	239.7	223.7	242.9	267	20.8	12.1	294.9	365.3	147.2	172.2		0.140649	0.121939	0.125699	0.142618	0.00513546	0.00421132	0.193852	0.16065	0.0996181	0.0788362
P13804	FALSE	Electron transfer flavoprotein subunit alpha, mitochondrial OS=Homo sapiens OX=9606 GN=ETFA PE=1 SV=1	ETFA		25	6	1246.7	1680.1	3478.3	4137.4	277.3	233.2	1381.7	2001.3	2236	2720		30	7	3710.1	3015.9	426.6	386.9	7091.6	6696.4		38	7	3900.1	3397.9	2094.5	1807.7	193.5	148.1	8339.8	9581.1	1487.3	1640.9		0.580427	0.739871	1.76869	1.87382	0.0687953	0.0629539	0.877604	0.824802	1.00472	1.26212
P13807	FALSE	Glycogen [starch] synthase, muscle OS=Homo sapiens OX=9606 GN=GYS1 PE=1 SV=2	GYS1															17	7	1067.8	1031.1	102.5	90.7	1502.7	1345.8		4	3	89.2	68.1	94.3	97.3	10.3	5.3	116.4	121.9	66.3	59.5
P13861	FALSE	cAMP-dependent protein kinase type II-alpha regulatory subunit OS=Homo sapiens OX=9606 GN=PRKAR2A PE=1 SV=2	PRKAR2A		19	8	691.4	889.4	744	931.7	47	49.5	804.5	1082	537.9	584		33	8	2807.9	2503.8	202.2	153.8	3328.8	3162.5		26	5	1591.1	1424.1	1356.4	1262.2	116.2	87.5	3128.3	3559	998	1140.4		0.321896	0.391668	0.378318	0.421966	0.0116602	0.0133628	0.510988	0.445928	0.241698	0.270985
P13984	FALSE	General transcription factor IIF subunit 2 OS=Homo sapiens OX=9606 GN=GTF2F2 PE=1 SV=2	GTF2F2		2	2	78.2	98.6	129.2	164	6.9	6.5	138.7	170.8	83.2	95.4																								0.0364077	0.0434208	0.0656971	0.0742754	0.00171182	0.00175472	0.0880971	0.0703924	0.0373849	0.0442671
P13995	FALSE	Bifunctional methylenetetrahydrofolate dehydrogenase/cyclohydrolase, mitochondrial OS=Homo sapiens OX=9606 GN=MTHFD2 PE=1 SV=2	MTHFD2															8	4	564.1	503.7	54.5	48.8	1400.3	1184.5		7	2	250.6	227.7	182.9	193.2	9.9	6.7	300.6	322.6	125.8	147.6
P14174	FALSE	Macrophage migration inhibitory factor OS=Homo sapiens OX=9606 GN=MIF PE=1 SV=4	MIF		228	3	3594.6	3867.9	16671	21083.3	987.8	981.8	3771.2	4927.9	7572.7	6347.7		94	2	4210.2	3893.4	426.1	384.4	7991.8	6130.1		213	2	13933.1	12585.5	2702.7	3406.9	296.2	249.5	5857.9	7307.6	1851	1952.6		1.67354	1.70332	8.47707	9.5486	0.245063	0.265043	2.39533	2.03095	3.4027	2.94543
P14314	FALSE	Glucosidase 2 subunit beta OS=Homo sapiens OX=9606 GN=PRKCSH PE=1 SV=2	PRKCSH		17	11	1399.3	1575.6	967.6	1187.6	101.4	90.4	1274.8	1707.6	881.8	813		29	9	4530	3862.3	437.2	362.1	6762.4	5519.9		40	14	4908.2	3963.9	3239.9	2917.3	236.4	187.9	6004.3	6752.4	3505.6	3924.2		0.651474	0.693852	0.492017	0.537862	0.0251563	0.0244041	0.809705	0.703759	0.396226	0.377245
P14324	FALSE	Farnesyl pyrophosphate synthase OS=Homo sapiens OX=9606 GN=FDPS PE=1 SV=4	FDPS		19	5	828.1	930	1134.2	1359.9	52.1	55.8	773.5	1081.5	1033.5	852.3		26	4	3303.2	3075.2	277.2	248.6	6242.7	5044.7		21	4	1574.4	1411.5	918.4	1022.1	78.8	62.6	2882.5	3289.6	720	855.1		0.385539	0.409547	0.576731	0.615897	0.0129255	0.0150636	0.491298	0.445722	0.46439	0.39548
P14406	TRUE	Cytochrome c oxidase subunit 7A2, mitochondrial OS=Homo sapiens OX=9606 GN=COX7A2 PE=1 SV=1	COX7A2		20	2	1105.1	1228.1	2166.7	2556.4	81.2	101.5	2449.3	3142.1	1361.6	1132.1		47	2	1720.5	1735.1	100.2	59.6	17288.4	19768.2		27	2	1324.5	1045.4	663.8	675.4	28.6	24.6	2925.1	2894.3	3074.5	3086		0.514503	0.540823	1.10175	1.15779	0.0201449	0.0274006	1.5557	1.29496	0.611818	0.525312
P14550	FALSE	Alcohol dehydrogenase [NADP(+)] OS=Homo sapiens OX=9606 GN=AKR1A1 PE=1 SV=3	AKR1A1		3	2	51.4	64.5	170.9	193	13.4	9.1	81.3	101	116.8	120											4	2	188.2	173.2	105.9	99.1	13	2.9	412.1	504.9	90	87.3		0.0239304	0.0284041	0.0869013	0.0874094	0.0033244	0.0024566	0.0516387	0.0416255	0.0524826	0.0556819
P14618	FALSE	Pyruvate kinase PKM OS=Homo sapiens OX=9606 GN=PKM PE=1 SV=4	PKM		217	30	12268	14714.4	15468.5	19433.9	1346.5	1245	21863.2	29191.7	13240.9	12694.8		343	30	49425.3	45023.6	4472.9	3904.2	104833	94852.9		256	32	22952.2	21569.2	13709.7	14745.6	1601.7	1239	31368.2	40933	10679.6	12666.3		5.71163	6.47983	7.86561	8.80159	0.334053	0.336096	13.8867	12.0309	5.94963	5.89059
P14625	FALSE	Endoplasmin OS=Homo sapiens OX=9606 GN=HSP90B1 PE=1 SV=1	HSP90B1		153	37	11071.6	12384.6	5878.5	7439.4	391.7	330.8	21053	29052.2	5609.1	5577.1		292	39	30325	27097.2	1926.7	1549.2	86190	72158.5		190	36	19538.5	17208.8	10201.1	9309.9	508.4	394.9	25868.1	30574.8	9944.2	11170.1		5.15462	5.45385	2.98917	3.36929	0.0971767	0.0893016	13.3721	11.9734	2.52038	2.58786
P14635	FALSE	G2/mitotic-specific cyclin-B1 OS=Homo sapiens OX=9606 GN=CCNB1 PE=1 SV=1	CCNB1		2	2	61.3	86.6	131	172.8	11.1	10.7	90.7	125.2	59	60.7																								0.0285395	0.0381363	0.0666124	0.0782609	0.0027538	0.00288853	0.0576092	0.0515991	0.0265109	0.0281657
P14678	FALSE	Small nuclear ribonucleoprotein-associated proteins B and B' OS=Homo sapiens OX=9606 GN=SNRPB PE=1 SV=2	SNRPB		17	2	132.1	164.9	153.2	180.8	19.4	14.8	148.7	199.5	110.5	99.6		16	2	1492.6	1192.1	143.1	130.3	2378.7	2094		19	3	1009.8	872.5	654.3	589.6	93	69	1372.8	1503	708.8	713.5		0.0615019	0.0726176	0.0779009	0.0818841	0.00481294	0.00399536	0.0944487	0.0822206	0.0496518	0.046216
P14735	FALSE	Insulin-degrading enzyme OS=Homo sapiens OX=9606 GN=IDE PE=1 SV=4	IDE		8	4	71.2	76.4	95.7	136.6	7.4	7.9	62.5	98.9	63.2	53.9		10	4	456.8	411.5	33.6	26.2	632.1	612.4		8	6	207.7	182.3	110.4	111.4	17.3	7.8	283.9	332.8	98.7	132.5		0.0331487	0.0336445	0.0486627	0.0618659	0.00183586	0.00213266	0.0396977	0.04076	0.0283981	0.0250104
P14854	FALSE	Cytochrome c oxidase subunit 6B1 OS=Homo sapiens OX=9606 GN=COX6B1 PE=1 SV=2	COX6B1		5	3	550.1	765.7	483.2	635.7	41.2	53.7	586.4	768.8	439.8	330.1											10	2	1350.8	995.4	890.4	946.7	89.4	63.4	2398.5	2486.4	1169.8	1138.6		0.256111	0.337194	0.245703	0.287908	0.0102213	0.0144967	0.372459	0.316848	0.197619	0.153172
P14866	FALSE	Heterogeneous nuclear ribonucleoprotein L OS=Homo sapiens OX=9606 GN=HNRNPL PE=1 SV=2	HNRNPL		85	19	7597.8	7322.3	5260.1	6131	364	352.1	9843.3	12818.1	4261.9	3306.4		156	17	22381.1	21782.8	1712.7	1471.2	41716.6	32334		56	13	3532.3	3193.8	3891.2	4036.4	321.5	254	6744.4	8021.5	2577.5	2723.3		3.53732	3.22455	2.67472	2.77672	0.0903047	0.0950517	6.2521	5.28276	1.91503	1.53422
P14868	FALSE	Aspartate--tRNA ligase, cytoplasmic OS=Homo sapiens OX=9606 GN=DARS PE=1 SV=2	DARS		22	11	858.8	952.8	1649.9	1939.9	108.3	82.5	812.4	1030.5	1345.6	1147.7		47	14	2500.7	2225	242.9	212	4096.8	3681.3		45	14	2885.9	2716.4	1715.7	1715.2	136.4	97.5	4070.3	5088.6	1172.4	1315.4		0.399832	0.419588	0.838961	0.878578	0.0268681	0.0222714	0.516006	0.424703	0.604628	0.532551
P14923	FALSE	Junction plakoglobin OS=Homo sapiens OX=9606 GN=JUP PE=1 SV=3	JUP		7	2	507.4	528.3	474.9	576.2	45.1	72.2	597.3	673.1	338.5	335.6																								0.236231	0.232649	0.241483	0.26096	0.0111888	0.0194909	0.379383	0.277407	0.152101	0.155724
P14927	FALSE	Cytochrome b-c1 complex subunit 7 OS=Homo sapiens OX=9606 GN=UQCRB PE=1 SV=2	UQCRB		26	8	237.1	220.5	3827.1	4919.1	178.8	177.4	362.3	389.1	2076	1642.3		3	2	109.2	101.9	10.7	7.3	379.7	302.1		28	7	2287.1	1731.8	517.7	524.4	27.1	14.9	2717.8	2416.5	1845.2	1839		0.110387	0.0971023	1.94605	2.22785	0.0443584	0.0478903	0.230119	0.160361	0.932824	0.762053
P15056	FALSE	Serine/threonine-protein kinase B-raf OS=Homo sapiens OX=9606 GN=BRAF PE=1 SV=4	BRAF															3	2
P15104	FALSE	Glutamine synthetase OS=Homo sapiens OX=9606 GN=GLUL PE=1 SV=4	GLUL		2	2	101.4	100	90.3	118.3	5.8		110.8	156.8	87.3	76.4											3	2												0.0472089	0.0440373	0.0459168	0.0535779	0.00143892		0.070376	0.0646225	0.0392271	0.0354508
P15121	FALSE	Aldose reductase OS=Homo sapiens OX=9606 GN=AKR1B1 PE=1 SV=3	AKR1B1		21	9	1224.9	1379.6	3487.1	4411.1	256.2	228	1577.1	2083.9	2704.3	2473.1		11	5	581.1	461.4	81.2	84.6	683.4	590.4		35	9	2043.6	1739.9	1353.3	1538.8	160.7	135.9	4017.2	5326.7	862.3	1026.1		0.570278	0.607539	1.77316	1.99778	0.0635606	0.0615501	1.00171	0.858844	1.21514	1.14756
P15170-3	FALSE	Isoform 3 of Eukaryotic peptide chain release factor GTP-binding subunit ERF3A OS=Homo sapiens OX=9606 GN=GSPT1	GSPT1		29	11	1076	1198	1523.4	2009	100.4	88.4	1210.3	1550.7	833.1	806.9		55	11	4981.8	4790.4	361	311.1	6575	5359.7		29	10	1370.3	1345.2	1551.2	1498.9	88.1	74.3	2031.3	2421.1	804.8	964.5		0.500954	0.527567	0.774636	0.909873	0.0249082	0.0238642	0.768737	0.639095	0.374343	0.374414
P15289	FALSE	Arylsulfatase A OS=Homo sapiens OX=9606 GN=ARSA PE=1 SV=3	ARSA															8	3	107.1	86.8	6.1	5.2	278.5	230.4
P15311	FALSE	Ezrin OS=Homo sapiens OX=9606 GN=EZR PE=1 SV=4	EZR		35	11	3437.7	3895.8	2017.5	2586.7	191.1	166.4	2263.6	2882.6	1687.4	1743.2		86	16	11909.3	9943.8	903.2	718.4	14187.5	13037.8		80	13	4779.7	4583.6	3995	3982.2	265.2	232.8	5389.3	6642.8	2525.8	3019.3		1.60049	1.71561	1.02588	1.17151	0.0474099	0.0449208	1.43775	1.18802	0.758212	0.808872
P15374	FALSE	Ubiquitin carboxyl-terminal hydrolase isozyme L3 OS=Homo sapiens OX=9606 GN=UCHL3 PE=1 SV=1	UCHL3		12	3	933.2	967.4	1242.2	1482.6	84.3	88.1	1969.2	2727.9	1102.1	913.7		35	7	2764.8	2455.2	209.2	161.3	12597.4	11457.8		18	4	1119.1	1007.1	745.6	859.7	73.4	58.6	2180.5	2911.2	1565.3	1628.9		0.434471	0.426017	0.631649	0.671467	0.020914	0.0237832	1.25076	1.12426	0.495215	0.423971
P15529-2	TRUE	Isoform B of Membrane cofactor protein OS=Homo sapiens OX=9606 GN=CD46	CD46		3	2	212.5	262.6	439.6	480.1	45.4	55.9	311.4	342.3	249	258.2																								0.0989338	0.115642	0.223533	0.217437	0.0112633	0.0150906	0.19779	0.141073	0.111885	0.119809
P15559	FALSE	NAD(P)H dehydrogenase [quinone] 1 OS=Homo sapiens OX=9606 GN=NQO1 PE=1 SV=1	NQO1															5	2	332	280.7	24.7	22.4	1229	1057
P15586	FALSE	N-acetylglucosamine-6-sulfatase OS=Homo sapiens OX=9606 GN=GNS PE=1 SV=3	GNS		5	3												20	7	753.7	648.9	52.7	47.4	1911.5	1571.5
P15880	FALSE	40S ribosomal protein S2 OS=Homo sapiens OX=9606 GN=RPS2 PE=1 SV=2	RPS2		70	12	5615.2	6479	10972	13782.4	810.4	762.2	7495.2	10100.8	8024.4	6980.2		122	15	24195.2	19869.1	2283.5	1917.4	36835.1	32115.3		80	11	8098.2	7798	6743.5	6645.4	726.3	598.2	16065.1	19901.7	6894.4	8838.2		2.61427	2.85318	5.57917	6.24203	0.201052	0.205761	4.76067	4.16288	3.60566	3.23892
P15924	FALSE	Desmoplakin OS=Homo sapiens OX=9606 GN=DSP PE=1 SV=3	DSP		6	2	123.7	150.1	144.6	176.5	18.2	16.6	283.1	251.5	71.7	90.2		14	6	1117.7	963	204.5	149.5	1377.1	1348.9		9	4	83.5	71.3	160.8	344.5	151.9	29.2	182.3	219.9	133.8	123.2		0.0575911	0.0661001	0.0735279	0.0799366	0.00451523	0.00448128	0.179815	0.103652	0.0322175	0.0418542
P15927	FALSE	Replication protein A 32 kDa subunit OS=Homo sapiens OX=9606 GN=RPA2 PE=1 SV=1	RPA2		5	2	53.2	49.6	72.9	91.1	5.5		88.9	109.3	58.2	55.8		10	3	406.1	365.7	25.7	24.8	843.3	698.7															0.0247684	0.0218425	0.0370691	0.0412591	0.00136449		0.056466	0.0450462	0.0261514	0.0258921
P15954	TRUE	Cytochrome c oxidase subunit 7C, mitochondrial OS=Homo sapiens OX=9606 GN=COX7C PE=1 SV=1	COX7C		5	2	86.9	83.6	385.2	502.2	22.7	20.5	147.7	194.9	431.5	300.9											4	2	402.8	312.1	158.7	156.2	14.8	14.5	471.9	524.9	433.3	470.3		0.0404581	0.0368152	0.195871	0.227446	0.00563164	0.00553411	0.0938135	0.0803248	0.193889	0.139622
P16083	FALSE	Ribosyldihydronicotinamide dehydrogenase [quinone] OS=Homo sapiens OX=9606 GN=NQO2 PE=1 SV=5	NQO2		10	4	168.1	217.9	2392.7	2635.8	136	105.3	168.2	217.2	422	489																								0.0782625	0.0959574	1.21667	1.19375	0.0337402	0.0284264	0.106834	0.0895153	0.18962	0.226904
P16104	FALSE	Histone H2AX OS=Homo sapiens OX=9606 GN=H2AFX PE=1 SV=2	H2AFX															42	2	544.1	423.9	68.8	60.6	860.8	733.6		36	3	4436	4439.9	3776.7	2558	355.3	327.7	5320.8	6035.8	2281.9	2622.1
P16152	FALSE	Carbonyl reductase [NADPH] 1 OS=Homo sapiens OX=9606 GN=CBR1 PE=1 SV=3	CBR1; SETD4		22	6	690.1	792.7	1849.5	2324.2	144.4	141.6	642.6	956.6	1508.4	1428.7		36	9	3497.7	3192.8	420.9	393.9	5377.4	4450.3		21	6	1039.4	907	563.1	655.4	68	52.1	2111.3	2670.8	462.6	542.6		0.321291	0.349084	0.940456	1.05263	0.0358242	0.0382258	0.408155	0.394247	0.67778	0.662939
P16278	FALSE	Beta-galactosidase OS=Homo sapiens OX=9606 GN=GLB1 PE=1 SV=2	GLB1		33	9	5091.2	5658.3	490.3	569.2	69.5	68.8	3036.6	4256.6	869.6	782.4		108	13	8165.2	7646.1	606.5	514.9	14829.7	12161.2		26	8	376.6	369.2	1213.3	1233.6	64.7	55.4	610.8	681.8	1883.8	2096.3		2.37032	2.49177	0.249314	0.25779	0.0172422	0.018573	1.92873	1.75429	0.390744	0.363046
P16333	FALSE	Cytoplasmic protein NCK1 OS=Homo sapiens OX=9606 GN=NCK1 PE=1 SV=1	NCK1		3	2												3	2
P16402	FALSE	Histone H1.3 OS=Homo sapiens OX=9606 GN=HIST1H1D PE=1 SV=2	HIST1H1D		38	4	271.7	325.9	333.5	582.7	82.7	63.6	145.3	122.1	379	447.1		146	5	5062.7	4326.6	1369.1	995.5	4389.4	4120.8		115	6	2027.1	2440.6	2232.7	1202	102.6	98.9	2697	3010.9	962.6	1115.4		0.126496	0.143518	0.169582	0.263904	0.020517	0.0171692	0.0922891	0.0503215	0.170299	0.207461
P16403	FALSE	Histone H1.2 OS=Homo sapiens OX=9606 GN=HIST1H1C PE=1 SV=2	HIST1H1C		47	3												171	5	11277.5	9181.7	2944.2	2170.9	9308.3	8757.2		147	6	15450.9	17009.1	15023.7	8473.2	893.3	760.1	18130.2	19896.4	5675.9	6661.6
P16435	TRUE	NADPH--cytochrome P450 reductase OS=Homo sapiens OX=9606 GN=POR PE=1 SV=2	POR		29	11	1081.5	1085	1325.6	1638.5	67	71.6	1614.7	2147.5	1307.7	1105.9		86	26	5164	4842.6	305.3	249.9	21971.5	18519		32	12	914.9	810.8	824.7	813	44.6	23.3	1772.3	1915.6	2667.6	2797.4		0.503515	0.477805	0.674057	0.742074	0.016622	0.0193289	1.0256	0.885056	0.587598	0.513155
P16591	FALSE	Tyrosine-protein kinase Fer OS=Homo sapiens OX=9606 GN=FER PE=1 SV=2	FER		3	2	74.5	97.2	60.9	80.4			427.5	566.8	58.4	72.3		10	4	190.7	181	13.1	14.3	1065	928.1															0.034685	0.0428043	0.0309672	0.036413			0.271532	0.233597	0.0262413	0.0335483
P16615	TRUE	Sarcoplasmic/endoplasmic reticulum calcium ATPase 2 OS=Homo sapiens OX=9606 GN=ATP2A2 PE=1 SV=1	ATP2A2		184	43	7522.4	8168.3	25125.5	31572.5	992.8	1123.2	14155.4	21179.3	32053.6	29445.3		224	46	21549.2	20314.5	1426.6	1165.5	89917.5	79179.5		119	31	7606.1	7409.1	4773.1	4516.7	269	224.1	8736.3	8734	13491	15353.6		3.50221	3.5971	12.7761	14.2991	0.246303	0.303215	8.99098	8.72869	14.4029	13.6631
P16949	FALSE	Stathmin OS=Homo sapiens OX=9606 GN=STMN1 PE=1 SV=3	STMN1		3	2	280.4	304.6	126.3	141.7	7.6	6.4	206.1	233.5	90.4	85.3		17	3	1391.8	1184.9	97.3	76.5	2336.8	2140.4		9	4	972.5	713.2	339	358.9	25	9	988.5	1231.8	321.7	376.3		0.130546	0.134138	0.0642225	0.0641757	0.00188548	0.00172772	0.130907	0.0962331	0.0406201	0.0395805
P16989	FALSE	Y-box-binding protein 3 OS=Homo sapiens OX=9606 GN=YBX3 PE=1 SV=4	CSDA; YBX3		8	2	412.3	520.7	113.4	130.2	11.7	13.3	442.6	555.1	106.8	119.5		60	4	5813.7	4980.9	544.1	441.3	8467.7	7267.6		12	2	80.5	70.7	60.1	47.9	3.5	2.8	112.1	120	40.7	57.6		0.191955	0.229302	0.057663	0.0589674	0.00290265	0.00359042	0.281123	0.228775	0.0479892	0.0554499
P17152	TRUE	Transmembrane protein 11, mitochondrial OS=Homo sapiens OX=9606 GN=TMEM11 PE=1 SV=1	TMEM11		14	4	116.6	127.7	1089.6	1285.5	55.4	51.6	316.8	436.8	890.8	740.1		14	2	200.3	179.5	15.2	6.8	782.1	698.7		6	3	201.9	178.6	100.5	97.7	13	7	329.2	338.3	211.1	229.2		0.0542856	0.0562357	0.554053	0.582201	0.0137442	0.0139298	0.20122	0.18002	0.40027	0.343418
P17174	FALSE	Aspartate aminotransferase, cytoplasmic OS=Homo sapiens OX=9606 GN=GOT1 PE=1 SV=3	GOT1															10	2	1240.6	987.1	152.4	119.5	1575.4	1566.3		12	2	1362.1	1009.7	640.5	698.9	95.3	81	1189.4	1895.9	520	657.9
P17302	TRUE	Gap junction alpha-1 protein OS=Homo sapiens OX=9606 GN=GJA1 PE=1 SV=2	GJA1		4	3	112	124.1	118.6	139.6	6.9	9.1	166.9	204.5	77.5	84.1		8	3	432.4	391.5	33.5	30.8	990.2	876.6															0.052144	0.0546503	0.0603071	0.0632246	0.00171182	0.0024566	0.106009	0.0842812	0.0348236	0.0390237
P17480	FALSE	Nucleolar transcription factor 1 OS=Homo sapiens OX=9606 GN=UBTF PE=1 SV=1	UBTF		5	3	196.3	202.8	243.2	231	23.7	35.4	322.4	362.6	104.8	103.4											14	9	216.5	171.9	218.2	290.5	69.3	49.1	358.2	372.3	192.2	177.5		0.0913916	0.0893077	0.123665	0.10462	0.00587973	0.00955646	0.204776	0.149439	0.0470905	0.0479792
P17568	FALSE	NADH dehydrogenase [ubiquinone] 1 beta subcomplex subunit 7 OS=Homo sapiens OX=9606 GN=NDUFB7 PE=1 SV=4	NDUFB7		6	4	139.3	173.4	1134.6	1322.5	47	38.2	208.4	253.1	718.9	838.8																								0.064854	0.0763608	0.576935	0.598958	0.0116602	0.0103123	0.132368	0.104311	0.323029	0.389216
P17612	FALSE	cAMP-dependent protein kinase catalytic subunit alpha OS=Homo sapiens OX=9606 GN=PRKACA PE=1 SV=2	PRKACA		4	3	119.5	125.3	158.4	180.4	14.6	13.9	148.7	185.1	119.1	94		5	2	301.3	248.6	28.1	22.7	595.5	549.7		9	4	701	619.7	327.5	298.2	22.9	18.1	1012.1	1329.7	291.7	313.6		0.0556357	0.0551788	0.0805451	0.0817029	0.00362211	0.0037524	0.0944487	0.0762859	0.0535161	0.0436175
P17655	FALSE	Calpain-2 catalytic subunit OS=Homo sapiens OX=9606 GN=CAPN2 PE=1 SV=6	CAPN2		8	4	270.5	346.2	333.5	395.1	22.6	24.9	353.2	435.2	263.4	263.2		4	2	178.7	173.5	17.3	13.8	267.4	258.6		5	3	100.5	83.9	67.6	64.8	6.6	5.8	171.3	185.2	58.8	74.3		0.125937	0.152457	0.169582	0.17894	0.00560683	0.00672192	0.224339	0.17936	0.118355	0.122129
P17812	FALSE	CTP synthase 1 OS=Homo sapiens OX=9606 GN=CTPS1 PE=1 SV=2	CTPS1		56	15	2625.3	2942.7	2972.4	3719.1	223.7	210.7	8084.3	11499.6	2275.1	1893.3		131	17	15178.1	14362.6	1132.4	897.9	36968.8	30411.9		19	5	1256.8	1043.5	1522.4	1606.6	125.4	89.3	1828.5	2184.3	1097.6	1223.4		1.22226	1.29589	1.51144	1.68437	0.0554977	0.0568798	5.13485	4.73937	1.02229	0.878521
P17844	FALSE	Probable ATP-dependent RNA helicase DDX5 OS=Homo sapiens OX=9606 GN=DDX5 PE=1 SV=1	DDX5		116	23	10151.7	11188.9	7253.1	8919.8	524.8	506.2	15473.8	20946.2	6156.1	6192.5		198	24	29806.8	28023.6	2147	1796.6	46195.9	39431.2		111	18	2069.8	1839.1	1975.1	1921.2	171.3	148.6	4945.8	6156.7	1360.1	1532.1		4.72634	4.92729	3.68814	4.03976	0.130197	0.136652	9.82838	8.63262	2.76616	2.87342
P17858	FALSE	ATP-dependent 6-phosphofructokinase, liver type OS=Homo sapiens OX=9606 GN=PFKL PE=1 SV=6	PFKL		9	4	341	423.2	599.5	689	48.6	43.5	427.1	588.5	810.8	850		25	8	1554.5	1477.6	122.8	115.3	2317.2	2130.9		12	5	741.3	687.8	429.1	470.4	39.5	29.6	817.6	1033.4	295.4	370.9		0.15876	0.186366	0.304841	0.312047	0.0120572	0.0117431	0.271278	0.24254	0.364323	0.394413
P17900	FALSE	Ganglioside GM2 activator OS=Homo sapiens OX=9606 GN=GM2A PE=1 SV=4	GM2A		11	4	619.6	637.8	375.7	504.3	13.1	22.4	1772.8	2097.4	300.9	242.4		26	5	2776.8	2471.5	162.5	131.7	10632.8	9106.2		6	2	168.6	162.3	515.1	486.2	35	28.2	326.1	412.4	1601.1	1731.5		0.288468	0.28087	0.19104	0.228397	0.00324998	0.00604703	1.12602	0.864408	0.135206	0.112477
P17980	FALSE	26S proteasome regulatory subunit 6A OS=Homo sapiens OX=9606 GN=PSMC3 PE=1 SV=3	PSMC3		23	11	1499.9	1780.1	1798.2	2393.7	105.6	112.7	1476.2	2131.3	1449	1485.6		57	12	4410	4028.1	338.4	298.4	9419.4	8526.1		50	14	2754.8	2607.1	1407.6	1477.8	96.9	81.3	4774.2	5908.5	1132.2	1334.1		0.69831	0.783909	0.91437	1.0841	0.0261983	0.0304241	0.937627	0.878379	0.65109	0.689342
P17987	FALSE	T-complex protein 1 subunit alpha OS=Homo sapiens OX=9606 GN=TCP1 PE=1 SV=1	TCP1		73	23	3617.5	3696.7	5497.8	6645.9	347.5	323.3	4653.8	6258.3	4609.3	3701.4		123	24	10035.9	9294.9	815.5	718.5	22355.9	18395.5		71	18	4553	4339.2	2985.3	3162.1	229.3	177.5	6745.9	8472.8	2950.5	3818.6		1.6842	1.62793	2.79559	3.00992	0.0862112	0.0872769	2.95592	2.57925	2.07113	1.71751
P18031	FALSE	Tyrosine-protein phosphatase non-receptor type 1 OS=Homo sapiens OX=9606 GN=PTPN1 PE=1 SV=1	PTPN1		44	16	1442.3	1533.7	6940.2	8214.8	322.7	279.9	2808.6	3681.3	5362.1	4807.9		42	13	3355.4	3133.5	267.4	234.3	10387.4	8937.9		16	7	1933	1735.2	1331.7	1191.4	76.3	61.4	3373.8	3729.9	2325.3	2561.8		0.671493	0.675401	3.52903	3.72047	0.0800585	0.0755608	1.78392	1.51719	2.40939	2.23094
P18077	FALSE	60S ribosomal protein L35a OS=Homo sapiens OX=9606 GN=RPL35A PE=1 SV=2	RPL35A		18	5	398	459.2	661.4	834.1	104	91.3	538.1	637.4	572.1	521.5		33	6	2812.6	2190.9	553.2	486.5	4967.3	4090.8		9	3	838.7	901.1	678.7	461.6	119.2	102.4	1437.7	1666.9	766.4	765		0.185297	0.202219	0.336316	0.377763	0.0258013	0.024647	0.341781	0.262694	0.257066	0.241984
P18085	FALSE	ADP-ribosylation factor 4 OS=Homo sapiens OX=9606 GN=ARF4 PE=1 SV=3	ARF4		36	5	979	1002.5	2748.2	3412.9	137.2	124.6	2413.5	3363.7	2734.1	2014.3		54	4	4972.5	4516.5	405.6	310.5	20823.3	15906.1		35	3	867.6	713.6	521.2	563.6	46.6	31.8	1642.3	1871.7	812.8	945.2		0.455794	0.441474	1.39744	1.5457	0.0340379	0.0336366	1.53296	1.38629	1.22853	0.934667
P18124	FALSE	60S ribosomal protein L7 OS=Homo sapiens OX=9606 GN=RPL7 PE=1 SV=1	RPL7		9	5	605.6	707.5	672.5	747.6	95	70	636	781	528.4	508.9		26	8	6300	4573.7	879.7	730.9	7341.2	5804		35	7	4529	4198.8	2561.9	2180.8	289.8	234.9	6752.6	7657.3	1854.6	2175.6		0.28195	0.311564	0.341961	0.338587	0.0235685	0.018897	0.403963	0.321876	0.23743	0.236138
P18206	FALSE	Vinculin OS=Homo sapiens OX=9606 GN=VCL PE=1 SV=4	VCL		23	11	771.7	957.5	1141.3	1374.9	77.6	61.9	810.6	1050.3	795.9	861.7		44	17	3579.1	3338.7	298.5	228.7	4355.7	4118.5		41	16	2296.1	2240.1	1176.1	1161.7	97.3	81.2	2073.6	2726.8	895.1	1015.1		0.359281	0.421658	0.580342	0.62269	0.0192518	0.0167103	0.514863	0.432864	0.357627	0.399842
P18583	FALSE	Protein SON OS=Homo sapiens OX=9606 GN=SON PE=1 SV=4	SON		2	2												5	2	24.5	21.3			37.1	31.9
P18621	FALSE	60S ribosomal protein L17 OS=Homo sapiens OX=9606 GN=RPL17 PE=1 SV=3	RPL17		28	9	3672.9	3961.9	6687.9	8522.4	565.6	476.1	3628.3	4715.4	4785.9	4127.5		57	8	14555	12784.3	2391.3	2005	22842.9	20481.1		40	7	4538.1	3917.3	2971.1	2772.1	285.3	244.3	8460.8	9702.7	2814.1	2957.6		1.71	1.74472	3.40074	3.85978	0.14032	0.128526	2.30456	1.94337	2.15048	1.91522
P18669	FALSE	Phosphoglycerate mutase 1 OS=Homo sapiens OX=9606 GN=PGAM1 PE=1 SV=2	PGAM1; LOC643576		49	10	1929.2	2334	3933.3	5288.3	219.5	203.4	1804.1	2371.4	2295.9	2466		68	10	8415.7	6586	712.2	556.3	11457.5	9561.3		72	13	4391.4	4283.3	2190.7	2435.3	150.9	142.6	5676.2	7598.5	1679.1	2215.8		0.89818	1.02783	2.00005	2.39506	0.0544557	0.0549092	1.1459	0.977333	1.03163	1.14426
P18754	FALSE	Regulator of chromosome condensation OS=Homo sapiens OX=9606 GN=RCC1 PE=1 SV=1	RCC1		5	3	177.2	185.2	327.7	436.7	19.9	20.1	186.8	236.7	285.5	281.1		17	5	892.6	799.4	104.6	81.4	1314.2	1158.5		16	6	615.1	542.3	387.1	392.5	37.9	34.5	1263.7	1505.5	300.4	300		0.0824992	0.0815572	0.166633	0.197781	0.00493699	0.00542613	0.118648	0.0975519	0.128286	0.130435
P18887	FALSE	DNA repair protein XRCC1 OS=Homo sapiens OX=9606 GN=XRCC1 PE=1 SV=2	XRCC1															4	2	189.7	156.2	16.2	12.8	251.8	241.7		4	2	298.3	273.6	251.8	230.6	17.5	14.5	395.6	473.5	139	171.5
P19022	TRUE	Cadherin-2 OS=Homo sapiens OX=9606 GN=CDH2 PE=1 SV=4	CDH2															5	3	313.5	260.8	24.3	22.6	602.5	516.4		3	2	144.8	128.8	117.7	103.3	18.7	16	164.7	160	126.7	123.7
P19338	FALSE	Nucleolin OS=Homo sapiens OX=9606 GN=NCL PE=1 SV=3	NCL		121	33	17827.9	18826.6	12242.2	10298.4	1507.2	1773.1	15106.8	13724.1	6891.9	7087.8		293	42	70372.7	60015.7	7686.1	6563.2	51654.8	47618.4		229	38	30921.9	20948.3	21436.9	25768.3	7298.4	5503.7	26712.2	35623.8	16325.3	13024.6		8.30015	8.29073	6.22506	4.66413	0.373921	0.47866	9.59527	5.65616	3.09679	3.28885
P19367	FALSE	Hexokinase-1 OS=Homo sapiens OX=9606 GN=HK1 PE=1 SV=3	HK1		19	10	354.3	469.6	898.3	1015.9	58	47.8	522.5	744.6	712.8	722.9		55	19	4441.3	4138.8	351.9	282.7	13183.9	11688.4		37	15	1919.8	1793.6	1614.4	1549.1	135.2	98.2	3337.8	3537.8	3579.8	4028.3		0.164952	0.206799	0.456778	0.4601	0.0143892	0.0129039	0.331872	0.306874	0.320288	0.335437
P19388	FALSE	DNA-directed RNA polymerases I, II, and III subunit RPABC1 OS=Homo sapiens OX=9606 GN=POLR2E PE=1 SV=4	POLR2E		9	2	276.1	388.4	384.2	466.4	33.3	28.2	340.8	495.4	221.9	261		9	2	898.5	786.4	127.2	93.4	1371.9	1472.1		8	2	334.2	295.6	269.8	253.4	24.2	21.1	678.1	824.1	246.9	292.4		0.128544	0.171041	0.195363	0.211232	0.00826139	0.00761277	0.216463	0.204171	0.0997079	0.121108
P19404	FALSE	NADH dehydrogenase [ubiquinone] flavoprotein 2, mitochondrial OS=Homo sapiens OX=9606 GN=NDUFV2 PE=1 SV=2	NDUFV2																								6	2	70.7	64	28.7	24.9	3.4	3.1	104.9	107.1	22.2	23.7
P19525	FALSE	Interferon-induced, double-stranded RNA-activated protein kinase OS=Homo sapiens OX=9606 GN=EIF2AK2 PE=1 SV=2	EIF2AK2															6	5	656.6	605.8	53.5	47.5	933.1	815.8
P19623	FALSE	Spermidine synthase OS=Homo sapiens OX=9606 GN=SRM PE=1 SV=1	SRM		23	9	2106.9	2384.4	2544.4	3176.3	243	250.2	2742	4100.1	2109.9	1915.6		32	8	5695.1	5449	834.5	741.9	7460.4	6285.7		26	8	1731.3	1591.2	1780.5	2050.5	228.7	197.9	3282.7	4091.1	1259.5	1518.8		0.980912	1.05003	1.29381	1.43854	0.0602858	0.0675431	1.74162	1.68979	0.948057	0.888868
P19784	FALSE	Casein kinase II subunit alpha' OS=Homo sapiens OX=9606 GN=CSNK2A2 PE=1 SV=1	CSNK2A2																								6	4	299.1	274.8	268.1	260.5	20.3	15.1	407.4	507.4	174.7	200.7
P20020	TRUE	Plasma membrane calcium-transporting ATPase 1 OS=Homo sapiens OX=9606 GN=ATP2B1 PE=1 SV=4			8	5	382	463.9	1108.4	1248.1	57.1	50.4	573.4	813.9	704.5	711.2		16	4	1688.8	1527.6	141.7	116.9	4338.1	3753.3		4	2	332.9	291.5	245.2	228.1	24.1	13.3	516.3	600.8	370.3	434.2		0.177848	0.204289	0.563612	0.565263	0.0141659	0.0136058	0.364202	0.335435	0.316558	0.330008
P20042	FALSE	Eukaryotic translation initiation factor 2 subunit 2 OS=Homo sapiens OX=9606 GN=EIF2S2 PE=1 SV=2	EIF2S2		13	5	1588.8	1774	1410.8	1790.4	156.1	151	1279.9	1664.8	1302.7	1241.4		29	8	6754.3	5940.8	635	506.9	8287.5	7176.4		20	6	2574.6	2296.6	1886	1811	193.4	176.4	3312	3897.1	1321.7	1437.3		0.739699	0.781222	0.71738	0.81087	0.0387268	0.0407634	0.812945	0.686119	0.585352	0.576029
P20073	FALSE	Annexin A7 OS=Homo sapiens OX=9606 GN=ANXA7 PE=1 SV=3	ANXA7		25	8	1335.2	1587.4	999.4	1136	61.4	57.6	2712.1	3743.6	869.7	916.5		27	7	2771.6	2529.4	195.4	165.6	6820.4	5439.7		10	4	555.4	512.8	496.7	493.4	36.3	27.4	1149.3	1342.9	429.3	519.2		0.62163	0.699049	0.508187	0.514493	0.0152327	0.0155495	1.72262	1.54286	0.390789	0.42527
P20248	FALSE	Cyclin-A2 OS=Homo sapiens OX=9606 GN=CCNA2 PE=1 SV=2	CCNA2		4	2	65.6	66	83	105.2	4.1	5.1	99.4	129	38.2	55.4											4	2												0.0305415	0.0290646	0.0422048	0.0476449	0.00101717	0.00137678	0.0631352	0.0531652	0.0171647	0.0257065
P20290	FALSE	Transcription factor BTF3 OS=Homo sapiens OX=9606 GN=BTF3 PE=1 SV=1	BTF3															14	4	1592.3	854.2	164.6	96.1	1266	1382		14	2	2326.4	1826.9	571.9	505.2	30.8	24.7	1896.2	2225.3	424	542
P20338	FALSE	Ras-related protein Rab-4A OS=Homo sapiens OX=9606 GN=RAB4A PE=1 SV=3	RAB4A		11	3	21.3	23.7	69.9	100.2	3.8	3.8	28.1	33.7	43.3	37.9																								0.00991666	0.0104369	0.0355436	0.0453804	0.000942741	0.00102583	0.0178481	0.0138889	0.0194563	0.0175862
P20339	FALSE	Ras-related protein Rab-5A OS=Homo sapiens OX=9606 GN=RAB5A PE=1 SV=2	RAB5A		30	4	212.9	265.7	1548	1786.3	59.5	53	287.6	372.5	828.5	892.6		13	2	300.2	254.9	18	15.4	792.9	785.6		16	2	246.2	227.3	224.5	208.9	17.2	9.6	364.2	351.2	237.5	274.4		0.0991201	0.117007	0.787145	0.809013	0.0147613	0.0143077	0.182673	0.15352	0.372276	0.41418
P20618	FALSE	Proteasome subunit beta type-1 OS=Homo sapiens OX=9606 GN=PSMB1 PE=1 SV=2	PSMB1		74	9	5811.3	6569.3	1658.9	1959.8	150.4	138.4	10659.4	14849.7	1434.1	1290.9		121	10	14509.8	14240.5	982.1	832.6	25771.3	18482.7		39	6	1812.6	1550.3	1657.3	2047.2	188.2	153.7	1922.7	2309.9	1312.2	1522.1		2.70557	2.89295	0.843537	0.887591	0.0373127	0.037362	6.77045	6.12005	0.644395	0.598998
P20645	TRUE	Cation-dependent mannose-6-phosphate receptor OS=Homo sapiens OX=9606 GN=M6PR PE=1 SV=1	M6PR		24	5	1233.2	1715.2	3129.3	3574.3	160.7	147	1005.6	1171.3	1782.3	2245.2		36	3	4762.1	3896.4	299.5	234.1	7978.8	8872.6		19	4	1491.2	1411.5	2117.3	1619.9	116.1	68.2	2071.7	2060.6	3189	3467.2		0.574142	0.755329	1.59122	1.6188	0.039868	0.0396836	0.63872	0.482732	0.800854	1.04181
P20674	FALSE	Cytochrome c oxidase subunit 5A, mitochondrial OS=Homo sapiens OX=9606 GN=COX5A PE=1 SV=2	COX5A		11	5	410.2	468	1275.9	1759.7	86	85.5	565	791.7	710	702.2		16	6	739.1	670.9	56.3	45.9	3295.1	2986		32	8	1108.6	937.4	545.4	566.6	56.8	39.8	2415.9	2369.1	820.6	982.3		0.190977	0.206095	0.648785	0.796966	0.0213357	0.0230813	0.358867	0.326286	0.319029	0.325832
P20700	FALSE	Lamin-B1 OS=Homo sapiens OX=9606 GN=LMNB1 PE=1 SV=2	LMNB1		81	20	4372.6	4483.5	8250.3	9836	440	382.6	3445.9	4559.6	6387.5	5835		107	22	13098.2	12080.6	901.5	689.7	21046.9	18835.3		77	19	4645.3	4463.7	3461.1	3023.1	224.1	149.6	6717.4	7783.8	3508.2	3913.4		2.03576	1.97441	4.19521	4.45471	0.109159	0.103285	2.18871	1.87916	2.87014	2.70753
P20810	FALSE	Calpastatin OS=Homo sapiens OX=9606 GN=CAST PE=1 SV=4	CAST		6	4	66.6	93.9	219.8	300.7	12.8	12.5	75.1	108.7	64.8	74.6		3	3	222.4	167.6	19.6	14.9	218.7	196.6		5	4	325.4	274.6	225.4	195.7	21.3	14.4	279.4	369.8	133.6	175.1		0.031007	0.0413511	0.111767	0.136187	0.00317555	0.00337446	0.0477007	0.0447989	0.0291171	0.0346156
P20839	FALSE	Inosine-5'-monophosphate dehydrogenase 1 OS=Homo sapiens OX=9606 GN=IMPDH1 PE=1 SV=2	IMPDH1															16	2
P21266	FALSE	Glutathione S-transferase Mu 3 OS=Homo sapiens OX=9606 GN=GSTM3 PE=1 SV=3	GSTM3		23	9	648.2	702	1556.6	2195.2	84.7	92.8	345.5	495.4	918.9	773		20	6	2215.5	2086.5	185.9	158.7	4703.2	3789		13	5	1213.3	969.5	1311.5	1461.6	112.9	96.3	1467.1	1932.2	500.4	584.2		0.301783	0.309142	0.791518	0.994203	0.0210132	0.025052	0.219449	0.204171	0.412896	0.358684
P21281	FALSE	V-type proton ATPase subunit B, brain isoform OS=Homo sapiens OX=9606 GN=ATP6V1B2 PE=1 SV=3	ATP6V1B2		6	4	400.3	481.5	338.8	392	27.2	25.7	388.8	568.8	252.3	286.9		13	5	815.5	710.6	61.4	46.5	1001.1	968.2		16	5	607.1	603.2	501.4	474.4	39.1	19.1	863.4	1111.1	388.4	476.3		0.186368	0.21204	0.172277	0.177536	0.00674804	0.00693788	0.246951	0.234421	0.113368	0.133126
P21283	FALSE	V-type proton ATPase subunit C 1 OS=Homo sapiens OX=9606 GN=ATP6V1C1 PE=1 SV=4	ATP6V1C1																								4	2	337.8	292.7	239.7	271.9	20.4	13	532.1	686.2	193.9	210.1
P21333	FALSE	Filamin-A OS=Homo sapiens OX=9606 GN=FLNA PE=1 SV=4	FLNA		51	22	1768.6	2035.8	2339.9	2851.1	203	178.9	1740.3	2393.1	1743.4	1752.3		111	36	11443	10716.3	1122	1014.7	12894.9	11316.5		71	22	3229.5	3091	4177.8	3835	364.2	264.8	4833.9	5780.5	2126.3	2552.2		0.823409	0.896512	1.18982	1.29126	0.0503622	0.0482952	1.10537	0.986276	0.783375	0.813095
P21397	TRUE	Amine oxidase [flavin-containing] A OS=Homo sapiens OX=9606 GN=MAOA PE=1 SV=1	MAOA		3	2												4	2
P21399	FALSE	Cytoplasmic aconitate hydratase OS=Homo sapiens OX=9606 GN=ACO1 PE=1 SV=3	ACO1																								3	2	24.1	23.9	17.7	21.9			33.8	40.9	13.9	14
P21796	TRUE	Voltage-dependent anion-selective channel protein 1 OS=Homo sapiens OX=9606 GN=VDAC1 PE=1 SV=2	VDAC1		343	17	22340.6	21860.2	32756.5	40637.8	1383.9	1569.3	13619.5	18986.4	58322.1	39700.8		591	17	35703.4	31748.1	2161.6	1829.5	203701	156447		263	17	16040.4	14404.9	7446.6	7348.2	465.3	403.7	20608.6	22512.7	50688.7	57043.9		10.4011	9.62665	16.6564	18.4048	0.343331	0.423643	8.6506	7.82493	26.2063	18.4218
P21912	FALSE	Succinate dehydrogenase [ubiquinone] iron-sulfur subunit, mitochondrial OS=Homo sapiens OX=9606 GN=SDHB PE=1 SV=3	SDHB		37	10	2146.1	2383.1	2105.9	2683	152.4	156	13094.5	16491.1	1621	1508.6		87	10	4809.2	4049.7	359.6	289.9	33697.8	26722.6		20	7	1553.5	1285.1	599.1	585.6	74.9	52.3	3174.9	2642.2	1666.2	1740.5		0.999162	1.04945	1.07083	1.21513	0.0378089	0.0421132	8.31714	6.79653	0.728376	0.700014
P21926	TRUE	CD9 antigen OS=Homo sapiens OX=9606 GN=CD9 PE=1 SV=4	CD9		6	2	39.2	36	223.8	263.6	9.9	4.7	98.5	118.4	190.7	147											8	2	570.2	443.2	323.8	294.5	21.6	13.7	794.5	894	823.6	847.3		0.0182504	0.0158534	0.1138	0.119384	0.00245609	0.0012688	0.0625635	0.0487966	0.0856886	0.0682103
P21964	TRUE	Catechol O-methyltransferase OS=Homo sapiens OX=9606 GN=COMT PE=1 SV=2	COMT		37	13	702.4	852.9	4193.9	5212.5	236.1	237.5	1440.3	2147.3	2900	2898.1		40	11	2598	2445.3	321.2	307	11561.1	9766.5		22	12	1178.9	1122.4	730.5	775.2	54.8	44.9	1644.3	1562.9	1895	1986.7		0.327017	0.375595	2.13256	2.36073	0.058574	0.0641147	0.914825	0.884974	1.30308	1.34476
P22033	FALSE	Methylmalonyl-CoA mutase, mitochondrial OS=Homo sapiens OX=9606 GN=MUT PE=1 SV=4	MUT		2	2																					11	5	669.4	597.6	414.4	340.1	32.2	21.9	1314.9	1510.1	326.6	376.4
P22059	FALSE	Oxysterol-binding protein 1 OS=Homo sapiens OX=9606 GN=OSBP PE=1 SV=1	OSBP		16	7	570.5	632.6	552.5	720.3	39.5	37.7	565	762.2	435.2	372.2		26	8	2255.9	2116.2	204.6	161.3	3041.6	2710.3		10	4	109.2	102.5	85.8	85	6.5	4.8	131.9	150.4	59.8	74.7		0.265608	0.27858	0.280942	0.326223	0.00979954	0.0101774	0.358867	0.314128	0.195552	0.172707
P22061	FALSE	Protein-L-isoaspartate(D-aspartate) O-methyltransferase OS=Homo sapiens OX=9606 GN=PCMT1 PE=1 SV=4	PCMT1		30	9	2031.2	2383.2	4987.8	6231.4	379.8	383.2	2774.5	3699.4	3101.9	2956.4		44	9	5247.4	4694.2	591.5	484.6	7514.5	6087.6		28	7	1962.5	1837.2	1664.7	1737.2	189.4	156	3197	3898.9	975.6	1164.8		0.945668	1.0495	2.53626	2.82219	0.0942245	0.103447	1.76226	1.52465	1.3938	1.37182
P22087	FALSE	rRNA 2'-O-methyltransferase fibrillarin OS=Homo sapiens OX=9606 GN=FBL PE=1 SV=2	FBL		12	4	698.3	837.3	872.3	1060.9	64.7	41.2	1163.1	1021	560.7	604.8		9	3	358.8	285.9	28.6	25	468.7	445.8		15	5	991.6	1016.2	783.1	752	57.3	48.7	1447.3	1432.8	491.7	566.4		0.325108	0.368725	0.443557	0.48048	0.0160514	0.0111222	0.738758	0.420788	0.251943	0.280637
P22102	FALSE	Trifunctional purine biosynthetic protein adenosine-3 OS=Homo sapiens OX=9606 GN=GART PE=1 SV=1	GART		62	23	1764.4	2087.6	2404.3	2997.9	153.3	142.7	1949.6	2589.4	1706.4	1758.2		103	30	14272.2	13369.8	1082.1	943.6	16897.1	15543.9		63	24	2800.6	2626.1	2898.7	2874.9	219.6	143.6	4065.7	5142.4	1604.3	2002.2		0.821454	0.919324	1.22257	1.35774	0.0380322	0.0385228	1.23831	1.06718	0.766749	0.815832
P22234	FALSE	Multifunctional protein ADE2 OS=Homo sapiens OX=9606 GN=PAICS PE=1 SV=3	PAICS		56	16	2040.1	2357	6885.9	8159.1	435.4	419.5	2570.6	3542.4	4635.2	3977.2		68	16	7568.6	6920	852.5	813.5	11812.1	9536.9		63	16	4639.8	4010.7	3590.6	3890.3	328.1	280.3	6576.7	8349.5	1931.7	2291.5		0.949811	1.03796	3.50142	3.69524	0.108018	0.113247	1.63275	1.45994	2.08277	1.84548
P22307	FALSE	Non-specific lipid-transfer protein OS=Homo sapiens OX=9606 GN=SCP2 PE=1 SV=2	SCP2		51	11	962.7	1075.7	9113.6	10853.6	374.3	394.5	1291.5	1605.9	6632.7	5954.6		36	8	1890.9	1592.3	159.9	134.3	5381.7	4591.6		22	7	1288.9	1100.3	845.2	794.9	66.3	41.9	2396.4	2552.7	890.3	921.9		0.448205	0.47371	4.63419	4.91558	0.09286	0.106498	0.820312	0.661845	2.98032	2.76303
P22314	FALSE	Ubiquitin-like modifier-activating enzyme 1 OS=Homo sapiens OX=9606 GN=UBA1 PE=1 SV=3	UBA1		151	32	7510.6	8167.1	19363	22851.9	1375.6	1258.2	7869.1	11320.2	14293.4	12466.2		143	27	18192.3	16985	1778.5	1618.9	25787.5	21422.4		175	30	18874	17717.5	9916.7	10549.5	891.4	706.9	22523.8	29055.1	7075.9	8338.7		3.49672	3.59657	9.84593	10.3496	0.341272	0.339659	4.99816	4.66543	6.42256	5.78451
P22392-2	FALSE	Isoform 3 of Nucleoside diphosphate kinase B OS=Homo sapiens OX=9606 GN=NME2	NME1-NME2; NME1; NME2		75	6	5115.8	5647.9	12734.3	11495.1	647.2	538.6	4901.8	6034.1	6389.9	6090.1		77	5	13180.1	11553	1348.6	1177.2	16514.3	13972.7		99	5	8153.8	7088.5	6865.4	6827.1	501.3	442.5	12586.4	14968.8	3966.1	4690		2.38177	2.48719	6.47529	5.20611	0.160564	0.145399	3.11344	2.48685	2.87122	2.8259
P22626	FALSE	Heterogeneous nuclear ribonucleoproteins A2/B1 OS=Homo sapiens OX=9606 GN=HNRNPA2B1 PE=1 SV=2	HNRNPA2B1		251	20	32256.9	34640.8	12271.5	15641.7	1154.2	1097.3	63070.3	83605.1	11606.4	11162.7		623	21	95705	89796.5	6784.5	5677.5	264322	199242		183	19	15465.2	13569.3	12502	12648.7	1173.2	1033.7	37036.9	42178.7	11321.3	11735.5		15.0179	15.2549	6.23996	7.0841	0.286345	0.296223	40.0599	34.4564	5.21519	5.17967
P22695	FALSE	Cytochrome b-c1 complex subunit 2, mitochondrial OS=Homo sapiens OX=9606 GN=UQCRC2 PE=1 SV=3	UQCRC2		80	19	5707.1	7015.1	4206.9	4851	294.1	273	8240.5	10850.9	3518.5	3614.5		175	20	13341.1	11625.7	1008.7	760.7	41837.7	38890.1		55	14	4998.4	4472.7	3391.9	3185.1	328	281	7124.3	8463.2	3249.3	3482.8		2.65706	3.08926	2.13917	2.19701	0.0729632	0.0736981	5.23406	4.47202	1.58099	1.67718
P22830	FALSE	Ferrochelatase, mitochondrial OS=Homo sapiens OX=9606 GN=FECH PE=1 SV=2	FECH		42	9	5114	5554.5	3332.6	3815.8	158.7	153.4	1118.7	1484.1	3623.9	3321		27	7	2993.8	2696.7	184.8	167.1	7175.8	6705.3		8	3	309.7	289.5	277.2	245.1	21.5	14.9	482	523.7	336	359.3		2.38093	2.44605	1.6946	1.72817	0.0393718	0.0414113	0.710556	0.611647	1.62835	1.541
P23193	FALSE	Transcription elongation factor A protein 1 OS=Homo sapiens OX=9606 GN=TCEA1 PE=1 SV=2	TCEA1		7	4	481.6	490.4	396.1	466.2	58.4	48	553.7	697.6	335.5	302.7		11	4	974.9	885.8	111.3	93.4	1586.9	1256.3		7	4	554	548.1	552.6	553.2	101.5	88.4	794.6	1111.3	364	424.7		0.224219	0.215959	0.201414	0.211141	0.0144884	0.0129579	0.35169	0.287504	0.150753	0.140458
P23246	FALSE	Splicing factor, proline- and glutamine-rich OS=Homo sapiens OX=9606 GN=SFPQ PE=1 SV=2	SFPQ		106	26	10941	11739	4379.5	5199.3	367.6	319.2	13540.7	18245.6	4170	3854.4		164	23	22984.4	21225	1721.1	1400	33562.3	29963		100	22	6594.4	6177.6	6571.2	6349.7	463.3	361.5	12169.5	14578.1	4811.6	5309.3		5.09381	5.16954	2.22694	2.35476	0.0911978	0.0861701	8.60055	7.51962	1.87374	1.7885
P23258	FALSE	Tubulin gamma-1 chain OS=Homo sapiens OX=9606 GN=TUBG1 PE=1 SV=2	TUBG1		4	2	120.3	129.9	195.1	279	10.2	11.4	149.7	225.1	154.4	146.6		4	2	315.6	258.4	34.5	23.2	373.5	324.1		2	2												0.0560082	0.0572045	0.0992068	0.126359	0.00253052	0.0030775	0.0950838	0.0927712	0.0693777	0.0680247
P23284	FALSE	Peptidyl-prolyl cis-trans isomerase B OS=Homo sapiens OX=9606 GN=PPIB PE=1 SV=2	PPIB		31	9	1579.8	1620.7	2909.6	3671.8	209.3	182.3	1266.8	1772.2	2784.8	2361.8		51	10	1932.9	1597.5	230.8	211.9	3637.2	2875.5		57	12	4267	3775	2372.3	1877.6	185.9	150.8	6015.7	5926.2	2085.8	2307		0.735509	0.713713	1.47951	1.66295	0.0519252	0.0492131	0.804624	0.730382	1.25131	1.09591
P23368	FALSE	NAD-dependent malic enzyme, mitochondrial OS=Homo sapiens OX=9606 GN=ME2 PE=1 SV=1	ME2		7	3	30.4	31.2	62.6	81.1	2.2	2.7	38.3	52.5	45.2	44		11	3	621.2	604.4	47.6	43.2	592.9	527.6		11	3	289.3	256.7	161.8	155.6	16.2	10.5	445.2	526.2	108.9	129.1		0.0141534	0.0137397	0.0318316	0.0367301	0.000545797	0.000728883	0.0243267	0.021637	0.02031	0.0204167
P23378	FALSE	Glycine dehydrogenase (decarboxylating), mitochondrial OS=Homo sapiens OX=9606 GN=GLDC PE=1 SV=2	GLDC															3	2	158.8	154.1	14.1	12.7	247.6	199.7		3	2
P23381	FALSE	Tryptophan--tRNA ligase, cytoplasmic OS=Homo sapiens OX=9606 GN=WARS PE=1 SV=2	WARS		19	10	709.6	813.7	1480.1	1750.4	90.2	85	603.3	818.2	1174	1121.6		18	8	1869.3	1625.6	160.4	125	2837.7	2421.5		23	8	1455.7	1313.6	857.8	927.6	64.7	55.9	2090.3	2840.2	562	680.6		0.330369	0.358332	0.752619	0.792754	0.0223777	0.0229463	0.383194	0.337207	0.527522	0.52044
P23396	FALSE	40S ribosomal protein S3 OS=Homo sapiens OX=9606 GN=RPS3 PE=1 SV=2	RPS3		91	17	25287	28394.1	5627.1	7272	413.6	409	16552.2	20959.9	5493.9	5192.6		242	17	63324.4	58719.1	4375.8	3388.4	98274.1	82741		114	16	17955.9	16004.4	13869.6	15688.3	867.2	781	18232.2	21787.4	8863.8	9886.4		11.7729	12.504	2.86133	3.29348	0.10261	0.110412	10.5133	8.63827	2.46861	2.40945
P23434	FALSE	Glycine cleavage system H protein, mitochondrial OS=Homo sapiens OX=9606 GN=GCSH PE=1 SV=2	GCSH																								4	2	114.9	93.6	53.3	57.5	7.1	4.1	304.3	353	54.7	60.8
P23526	FALSE	Adenosylhomocysteinase OS=Homo sapiens OX=9606 GN=AHCY PE=1 SV=4	AHCY		53	16	4724.9	5401.1	6852.5	8335.3	601.2	528.5	5552.9	7349.7	5188.2	4938.1		112	16	27388.3	23850.7	2411.7	1973.4	29844	25735.6		75	17	6902.1	5915.9	5368.3	6102.5	682.9	572.6	10325.9	12103.9	3251.7	3733.3		2.19978	2.3785	3.48444	3.77505	0.149152	0.142672	3.52699	3.02906	2.33125	2.29136
P23528	FALSE	Cofilin-1 OS=Homo sapiens OX=9606 GN=CFL1 PE=1 SV=3	CFL1		45	8	4536	4696.2	5959.5	8322.1	616.3	651.6	3826.5	5066.4	4674.9	4031.3		63	7	9315.5	9398.7	1182.4	1153.9	13364.6	9896.4		71	9	6584.6	5507	3673.6	4252.7	403.9	342.6	9774.1	12035.3	2418.6	2931.4		2.11183	2.06808	3.03036	3.76907	0.152898	0.175904	2.43045	2.08803	2.10061	1.87059
P23588	FALSE	Eukaryotic translation initiation factor 4B OS=Homo sapiens OX=9606 GN=EIF4B PE=1 SV=2	EIF4B		10	5	317.1	280.9	126.1	158.9	12.5	10.1	290.4	360.7	120.6	89.5		36	11	3159.8	2831.2	299.1	189.7	3920.2	3404.6		10	4	513.2	449.1	351.5	369.2	23.1	14.1	555.5	659.8	245.6	301.8		0.147633	0.123701	0.0641208	0.0719656	0.00310112	0.00272656	0.184451	0.148656	0.0541901	0.0415294
P23786	FALSE	Carnitine O-palmitoyltransferase 2, mitochondrial OS=Homo sapiens OX=9606 GN=CPT2 PE=1 SV=2	CPT2		36	11	2390.5	2821.7	1254.2	1577	66.5	80.1	3325.8	5249.7	1128.1	1017		92	20	4026.1	3596.7	265.4	215.3	18570.2	15269.9		24	7	1124.6	1025.1	960.3	926.7	72.4	54.5	1487.5	1610.1	1515	1683.1		1.11295	1.2426	0.63775	0.714221	0.016498	0.0216235	2.11242	2.16358	0.506897	0.471904
P23919	FALSE	Thymidylate kinase OS=Homo sapiens OX=9606 GN=DTYMK PE=1 SV=4	DTYMK		2	2																					3	2
P23921	FALSE	Ribonucleoside-diphosphate reductase large subunit OS=Homo sapiens OX=9606 GN=RRM1 PE=1 SV=1	RRM1		26	12	1474.2	1766.4	1933.6	2533.1	154	132	2161.5	3014.9	1183.6	1233.3		45	16	2592.1	2423.1	208.4	177.5	3250.9	2874.3		17	6	1708.9	1605.4	1323.4	1368.2	87.8	82	2338	2990	745.2	932.4		0.686345	0.777876	0.98322	1.14724	0.0382058	0.0356343	1.3729	1.24254	0.531836	0.57227
P24390	TRUE	ER lumen protein-retaining receptor 1 OS=Homo sapiens OX=9606 GN=KDELR1 PE=1 SV=1	KDELR1		49	4	2126.3	2206.9	1370.6	1599	37.3	44.5	1643.4	2082.7	1180.5	957.4											9	3	700.6	526.7	433.7	432	17.6	18.5	744.8	706.4	1582.2	1810		0.989944	0.97186	0.696939	0.724185	0.00925375	0.0120131	1.04383	0.85835	0.530443	0.444249
P24468	FALSE	COUP transcription factor 2 OS=Homo sapiens OX=9606 GN=NR2F2 PE=1 SV=1	NR2F2		3	2	114.1	129.7	192.6	236.4	12.2	14.6	283.1	357	104.3	102.9																								0.0531217	0.0571164	0.0979355	0.107065	0.00302669	0.00394137	0.179815	0.147132	0.0468659	0.0477472
P24534	FALSE	Elongation factor 1-beta OS=Homo sapiens OX=9606 GN=EEF1B2 PE=1 SV=3	EEF1B2		36	7	2024.6	2193.9	3406.2	4417.1	227.7	215.8	1748.7	2371.9	3272.3	3142.1		87	7	17911.8	15613.4	1200	1053.5	26632.9	23041.1		59	7	5361.9	4525.1	4616.7	5562.8	231.1	233.6	8905.6	11641.7	2671.9	3263.8		0.942595	0.966135	1.73202	2.0005	0.05649	0.0582566	1.11071	0.977539	1.47037	1.45798
P24539	FALSE	ATP synthase F(0) complex subunit B1, mitochondrial OS=Homo sapiens OX=9606 GN=ATP5PB PE=1 SV=2	ATP5F1		32	9	1099.9	1206	2863.2	3503	111.6	123.6	4190.9	5027.1	2478.2	2185		85	10	3411.2	2624.7	151.7	145.3	28075.9	20366.3		30	9	1397.7	1254.4	458.3	380.8	19.3	12.5	2271	2571.4	1111.4	1203		0.512082	0.53109	1.45591	1.5865	0.0276868	0.0333666	2.6619	2.07183	1.11355	1.01387
P24666	FALSE	Low molecular weight phosphotyrosine protein phosphatase OS=Homo sapiens OX=9606 GN=ACP1 PE=1 SV=3	ACP1		14	5	1089.1	1127.1	646.9	802.4	100.7	111.2	1247.4	1586.8	595.1	513.4		30	3	1832.5	1679.7	191.1	179.2	2617.9	2193.8		8	3	612	521.1	518.9	591.7	88.9	71.1	1107.2	1313.5	487.8	512.3		0.507053	0.496345	0.328943	0.363406	0.0249826	0.0300192	0.792302	0.653973	0.267401	0.238226
P24752	FALSE	Acetyl-CoA acetyltransferase, mitochondrial OS=Homo sapiens OX=9606 GN=ACAT1 PE=1 SV=1	ACAT1		32	10	1642.4	1854	3742.5	4508.3	298.4	264.8	2326.7	3161.6	3055.4	2878.3		28	11	3640.5	3258	335.3	295.4	6687.1	5270.2		36	9	2588.6	2366.8	2161	1859.7	188.4	123.7	5685.9	5673.4	1381.2	1578.4		0.764654	0.816452	1.90303	2.0418	0.07403	0.0714845	1.47783	1.303	1.3729	1.33558
P24941	FALSE	Cyclin-dependent kinase 2 OS=Homo sapiens OX=9606 GN=CDK2 PE=1 SV=2	CDK2		12	4	361.1	463.4	402	493.4	43.4	36.5	437.8	586	306.8	295.6		11	3	1183.9	1011.5	88.1	80	1774.3	1542.6		10	4	369.9	335.5	293.6	295.6	52.5	43.3	616	713.9	218	241.9		0.168118	0.204069	0.204414	0.22346	0.0107671	0.00985341	0.278074	0.24151	0.137857	0.137163
P25205	FALSE	DNA replication licensing factor MCM3 OS=Homo sapiens OX=9606 GN=MCM3 PE=1 SV=3	MCM3		76	23	4260.9	5326.5	6538.8	7647.7	437	431.7	3744	5554.5	3634.6	3814		86	20	14980.7	13945.5	1094.8	911.1	14148.2	13267.5		59	18	4359	4248.9	3378.9	3418.6	339.8	281.8	6013.8	7543.2	2024.9	2462.5		1.98375	2.34565	3.32493	3.46363	0.108415	0.11654	2.37805	2.28919	1.63316	1.76976
P25325	FALSE	3-mercaptopyruvate sulfurtransferase OS=Homo sapiens OX=9606 GN=MPST PE=1 SV=3	MPST		19	5	731.6	840.4	1764.9	2061.5	83.9	86.4	1010.8	1267.9	884.1	880.4		32	9	2317	2056.8	188.5	157.9	4892.1	4983.7		28	4	705.2	619	634.1	673.7	47.6	36.9	1110.7	1358.4	522.4	593.9		0.340612	0.37009	0.897437	0.93365	0.0208147	0.0233242	0.642022	0.522544	0.397259	0.408519
P25398	FALSE	40S ribosomal protein S12 OS=Homo sapiens OX=9606 GN=RPS12 PE=1 SV=3	RPS12		23	5	2273.7	2468.4	2913	3811.4	400.9	377.8	2495.6	3312.6	2197.3	1966.8		36	5	3511.8	3313.9	571.3	561.3	5150.9	4125.8		33	5	2761.6	2169.5	1683.6	1890.2	311.1	255.7	4077.5	4995.9	1433	1716.5		1.05857	1.08702	1.48124	1.72618	0.0994592	0.10199	1.58511	1.36523	0.987329	0.912626
P25685	FALSE	DnaJ homolog subfamily B member 1 OS=Homo sapiens OX=9606 GN=DNAJB1 PE=1 SV=4	DNAJB1		7	4	37.2	39.6	53.1	57.3	3		68	100.9	43.3	45.8		4	2								7	3	156.5	137.4	114.7	114.2	9.6	8.5	341.7	270.8	151.4	177.1		0.0173192	0.0174388	0.0270009	0.0259511	0.000744269		0.0431911	0.0415842	0.0194563	0.0212519
P25705	FALSE	ATP synthase subunit alpha, mitochondrial OS=Homo sapiens OX=9606 GN=ATP5F1A PE=1 SV=1	ATP5A1		65	20	6344.4	6514.2	4509	5553.4	332.9	301.6	3140.7	4331.8	4169.4	3887.7		96	21	11363.2	9431.3	838	760.6	17053.3	14592.1		105	20	10042.6	9880.3	4572.7	3877.6	336.6	238.2	14865.1	16421.5	4458.9	4920		2.95377	2.86868	2.29279	2.51513	0.0825891	0.0814189	1.99486	1.78528	1.87347	1.80395
P25786	FALSE	Proteasome subunit alpha type-1 OS=Homo sapiens OX=9606 GN=PSMA1 PE=1 SV=1	PSMA1		23	7	1570.4	1615.3	1851.8	2291.9	236.2	239.9	1919	2547.5	1519	1368.5		57	8	6606.4	6294.9	768.1	752	8206.6	6509.4		24	6	1838.5	1683	1138.5	1230.2	241	190.3	2700	3371.7	874.8	914.2		0.731133	0.711335	0.941625	1.038	0.0585988	0.0647626	1.21888	1.04991	0.682543	0.635005
P25787	FALSE	Proteasome subunit alpha type-2 OS=Homo sapiens OX=9606 GN=PSMA2 PE=1 SV=2	PSMA2		24	6	654.6	754.2	719.8	900.3	33.4	37.8	1791.2	2665.4	607.3	541.2		33	6	2430.1	2275.2	153.5	150.1	5031.9	4233.8		12	4	281.2	244	156.5	160.4	15.2	13.2	500.8	619.4	150.2	180.4		0.304763	0.33213	0.366012	0.407745	0.0082862	0.0102044	1.1377	1.0985	0.272882	0.251125
P25788	FALSE	Proteasome subunit alpha type-3 OS=Homo sapiens OX=9606 GN=PSMA3 PE=1 SV=2	PSMA3		27	10	1544	1694.4	1523.3	1927.5	112.6	109.9	2146.5	2980.7	1235.9	1109		41	11	6172.7	5828.3	516.8	433.8	9162.1	6961.7		19	8	1329	1193.1	847.7	952.9	108.2	92.7	2267.5	2945	937	1042.4		0.718842	0.746169	0.774586	0.872962	0.0279349	0.0296682	1.36338	1.22845	0.555336	0.514593
P25789	FALSE	Proteasome subunit alpha type-4 OS=Homo sapiens OX=9606 GN=PSMA4 PE=1 SV=1	PSMA4		36	10	2195.2	2279	2130.4	2641.1	198.7	175.4	2175.9	2848.5	1923.6	1590.2		44	9	3396.3	3047.2	349.7	283.9	6428.7	5397.8		23	7	782.9	697.7	387.7	414	91	77.6	1300.9	1458.1	403	467.5		1.02202	1.00361	1.08329	1.19615	0.0492954	0.0473504	1.38205	1.17396	0.864345	0.737878
P26038	FALSE	Moesin OS=Homo sapiens OX=9606 GN=MSN PE=1 SV=3	MSN		21	4	117	157.9	91.8	109.4	7.3		78.3	109.7	69.6	66.3		42	7	827.1	733	62.6	58.3	1010.1	937.8		53	11	729.6	747	608.4	647.5	43.8	31.2	756.8	918.5	392.4	534.5		0.0544718	0.069535	0.0466795	0.0495471	0.00181105		0.0497332	0.045211	0.0312739	0.0307642
P26196	FALSE	Probable ATP-dependent RNA helicase DDX6 OS=Homo sapiens OX=9606 GN=DDX6 PE=1 SV=2	DDX6		67	15	1330.9	1461.7	16024.6	16982.9	743.6	679.8	1422.9	1856.9	8682.8	7795		28	6	4470.4	3821.7	379.1	306.3	4788.2	4902.6		15	4	2051.9	1787.8	1325.7	1303.1	90.7	69.7	3326.6	3984.7	885.4	1060.1		0.619628	0.643694	8.14838	7.69153	0.18448	0.183516	0.903773	0.76529	3.90151	3.617
P26358	FALSE	DNA (cytosine-5)-methyltransferase 1 OS=Homo sapiens OX=9606 GN=DNMT1 PE=1 SV=2	DNMT1		2	2	36.7	46	63	87	5.7	4.3	41.4	61.3	39.3	39.7		4	3	542.9	470	44.2	40.6	468.4	496.3		5	4	70.7	71.7	66	78.4	6.9	2.1	118.4	157.3	43.5	53.8		0.0170865	0.0202572	0.032035	0.0394022	0.00141411	0.00116081	0.0262957	0.0252638	0.017659	0.0184214
P26368	FALSE	Splicing factor U2AF 65 kDa subunit OS=Homo sapiens OX=9606 GN=U2AF2 PE=1 SV=4	U2AF2		35	8	1466.6	1617.4	1080	1315.5	144.8	140.2	1650.5	2308.7	1170.1	1119.8		120	12	8784	7972.1	806.5	692.5	30140.9	27445.6		62	8	3067.9	2600.2	3421.6	3603.1	337	277.9	5790.6	6890.2	2396.1	2604.7		0.682806	0.71226	0.549171	0.595788	0.0359234	0.0378479	1.04834	0.951492	0.525769	0.519605
P26373	FALSE	60S ribosomal protein L13 OS=Homo sapiens OX=9606 GN=RPL13 PE=1 SV=4	RPL13		18	7	866.9	1088.1	1524.2	2028.9	294.1	278.2	893	1116.7	1313.6	1246.9		29	8	6436.3	4828.9	1104.5	922.6	8225.8	7315.4		33	7	4013.7	3563.4	1849.2	1478.7	253.5	245	6170.9	6992	1693.4	1850.8		0.403604	0.47917	0.775043	0.918886	0.0729632	0.0751019	0.5672	0.460229	0.590249	0.578581
P26583	FALSE	High mobility group protein B2 OS=Homo sapiens OX=9606 GN=HMGB2 PE=1 SV=2	HMGB2		9	4	579.1	703	951.8	1072.4	81	62.9	587.9	757.8	560.7	607.5		14	4	2182.8	1813.3	216.6	183	2808.2	2333.4		19	4	1844.7	1497.5	751.2	777.8	69.1	37.3	1901.2	2220	530.2	550.4		0.269612	0.309583	0.483983	0.485688	0.0200953	0.0169803	0.373412	0.312315	0.251943	0.281889
P26599	FALSE	Polypyrimidine tract-binding protein 1 OS=Homo sapiens OX=9606 GN=PTBP1 PE=1 SV=1	PTBP1		79	11	3610.5	4023	4530.5	5808.7	294	265.7	4903.9	7144.1	3827.6	3381.1		148	12	14155.3	13420.9	1169.3	1098.6	25176.8	20674		77	11	3937.7	3622.4	4452.2	4471.7	318.2	248.5	6985.3	8685.4	2795.4	3222.4		1.68094	1.77162	2.30372	2.63075	0.0729384	0.0717275	3.11477	2.94432	1.71988	1.56888
P26639	FALSE	Threonine--tRNA ligase, cytoplasmic OS=Homo sapiens OX=9606 GN=TARS PE=1 SV=3	TARS		35	15	2108.2	2168.5	3516.3	4247.3	223.2	211.5	2124.8	2967.6	3438.6	2764.3		38	12	7375.6	7011.8	752.9	667	9314.8	7694.5		51	16	3987.6	3819.2	2361.2	2573.7	189.3	179.3	5395.9	6406.3	1520.7	1834		0.981517	0.95495	1.78801	1.9236	0.0553736	0.0570958	1.34959	1.22305	1.54509	1.28268
P26640	FALSE	Valine--tRNA ligase OS=Homo sapiens OX=9606 GN=VARS PE=1 SV=4	VARS; VARS2		12	9	306.3	364.9	510.6	610.3	47.6	40.7	343.9	500.8	408.6	375.7		74	23	7712.5	7285.2	582	510.1	6561.8	6026.2		34	11	1152.8	1123.7	953.9	964.9	72.8	56.7	1632	1810.5	614	761.6		0.142604	0.160692	0.259636	0.276404	0.0118091	0.0109872	0.218432	0.206396	0.183599	0.174331
P26641	FALSE	Elongation factor 1-gamma OS=Homo sapiens OX=9606 GN=EEF1G PE=1 SV=3	EEF1G		117	25	5819.7	6059.9	11347.3	14964.7	796.8	792.1	5545	7653.1	8880.6	7877.2		142	22	21007.6	18580.5	1866	1576.2	28526.1	24897.6		183	25	14064.6	12456.7	10351.5	10936.4	836.7	620.9	18748.8	25103.1	6719.4	7909.6		2.70948	2.66862	5.77001	6.77749	0.197678	0.213833	3.52198	3.1541	3.99038	3.65514
P26885	FALSE	Peptidyl-prolyl cis-trans isomerase FKBP2 OS=Homo sapiens OX=9606 GN=FKBP2 PE=1 SV=2	FKBP2															3	2	38.4	35.7	5.9	4.8	52.8	45.2		3	2
P27105	FALSE	Erythrocyte band 7 integral membrane protein OS=Homo sapiens OX=9606 GN=STOM PE=1 SV=3	STOM		9	4	536.7	532.9	386.2	460.6	15	18.4	651	809.1	342.2	309.7																								0.249872	0.234675	0.19638	0.208605	0.00372135	0.0049672	0.413491	0.333457	0.153763	0.143706
P27144	FALSE	Adenylate kinase 4, mitochondrial OS=Homo sapiens OX=9606 GN=AK4 PE=1 SV=1	AK4; LOC100507855																								6	3	695.1	583.4	368.1	350.4	28.6	16.8	1512.1	1611.5	269.6	295.2
P27348	FALSE	14-3-3 protein theta OS=Homo sapiens OX=9606 GN=YWHAQ PE=1 SV=1	YWHAQ		102	11	3874.9	3822.7	4792.1	5678.8	282.8	276.5	5765.9	7270.7	4835.3	3960.7		214	13	14680.7	13195.4	1116.5	932.4	39616.4	31413.8		108	10	6997.6	5870.9	5130.8	5193.9	426.8	362.5	10602.4	13658.7	3797.3	4248.5		1.80404	1.68342	2.43674	2.57192	0.0701598	0.074643	3.66228	2.9965	2.17268	1.83783
P27361	FALSE	Mitogen-activated protein kinase 3 OS=Homo sapiens OX=9606 GN=MAPK3 PE=1 SV=4	MAPK3		15	3	254.3	258.4	359.7	406.2	15.1	20.6	592.4	774.6	274	251.2		10	2	211.4	205	22.2	15.3	428.9	395.4															0.118395	0.113792	0.182905	0.183967	0.00374615	0.0055611	0.37627	0.319238	0.123118	0.116561
P27544	TRUE	Ceramide synthase 1 OS=Homo sapiens OX=9606 GN=CERS1 PE=1 SV=1	CERS1		4	3	70.3	82.9	146	160.4	7.6	2.9	121.7	170.8	117.1	118.1		8	3	699.1	642.3	49.5	42.7	2179.7	1793.8															0.0327296	0.036507	0.0742398	0.0726449	0.00188548	0.000782874	0.0772993	0.0703924	0.0526174	0.0548002
P27635	FALSE	60S ribosomal protein L10 OS=Homo sapiens OX=9606 GN=RPL10 PE=1 SV=4	RPL10		35	10	1433	1429.5	2678.7	3332.3	219.3	207.6	1664.6	2122.9	2082.7	1400.4		33	5	5670.2	5641.6	680.1	597.5	8030.8	6278.7		31	7	2796.5	2414.1	1771.8	1858.5	250.8	193.6	3816.5	4409.4	1294.5	1350.3		0.667163	0.629514	1.3621	1.50919	0.0544061	0.056043	1.05729	0.874918	0.935835	0.649807
P27694	FALSE	Replication protein A 70 kDa DNA-binding subunit OS=Homo sapiens OX=9606 GN=RPA1 PE=1 SV=2	RPA1		22	6	1161.2	1594.1	1823.1	2228.4	159.8	131.5	1542.9	2395.8	1454.3	1646.1		52	13	4222.8	3918.9	381.9	334.4	7337.3	6133.4		31	10	2396	2208.8	1892.9	1748.3	140.8	116.9	4128.3	5112.9	1071.3	1309		0.540621	0.701999	0.927031	1.00924	0.0396447	0.0354993	0.979992	0.987389	0.653471	0.763816
P27695	FALSE	DNA-(apurinic or apyrimidinic site) lyase OS=Homo sapiens OX=9606 GN=APEX1 PE=1 SV=2	APEX1		27	10	1650.5	1946.4	2622	3631.7	239.2	229.8	1772.1	2191.3	2385	2269.5		40	10	5876.3	4988.1	1391.2	1153.9	7229.9	6844.4		40	10	4272.6	4187.4	3047.2	3017.9	386.6	271.1	6231.7	6119.2	1883.6	2231.3		0.768425	0.857143	1.33327	1.64479	0.0593431	0.062036	1.12557	0.903107	1.07167	1.05308
P27707	FALSE	Deoxycytidine kinase OS=Homo sapiens OX=9606 GN=DCK PE=1 SV=1	DCK															3	2	109.5	89.1	9.2	6.7	302.3	277.6
P27708	FALSE	CAD protein OS=Homo sapiens OX=9606 GN=CAD PE=1 SV=3	CAD		27	13	878.9	980.2	974.9	1143.1	72.6	67.5	1289	1912.1	850.2	782.9		50	20	3391.4	3243.5	347.1	309.5	4906.5	4470.8		7	5	201.1	155.9	231.9	233.8	17.7	11.1	236.6	303.4	155.2	215.8		0.40919	0.431654	0.495729	0.517708	0.0180113	0.0182221	0.818725	0.78804	0.382027	0.363278
P27797	FALSE	Calreticulin OS=Homo sapiens OX=9606 GN=CALR PE=1 SV=1	CALR		65	16	7557.5	7953	4383.6	5794.5	394.5	361.6	5166.4	7020.7	4342	4093.3		93	15	15868.3	13138.9	1294.4	1033	17739.8	15799.1		109	17	12019.8	10742.1	7725.3	7146.6	547.5	449.4	18924.9	22032.1	6071.8	7293.4		3.51855	3.50229	2.22902	2.62432	0.0978714	0.0976163	3.2815	2.89346	1.95102	1.89936
P27816	FALSE	Microtubule-associated protein 4 OS=Homo sapiens OX=9606 GN=MAP4 PE=1 SV=3	MAP4		14	6	549.4	651.3	1158.9	1592.1	79.1	86.1	605.2	771.1	437.6	457.9		31	12	2579.4	2268.4	224.7	185.5	2380.6	2114		18	9	1200	1138	1428	1331.7	99.3	85.6	1292	1600.3	608.1	751.8		0.255785	0.286815	0.589291	0.72106	0.0196239	0.0232433	0.3844	0.317796	0.19663	0.212473
P27824	TRUE	Calnexin OS=Homo sapiens OX=9606 GN=CANX PE=1 SV=2	CANX		126	23	9441.7	10912.1	17771	21989.2	1035.7	1032.8	13396.6	19817.9	13500.5	14115.2		241	30	20051.9	17748.7	1631	1278.5	83324	77617.6		167	22	12263.1	11274.5	6035	5514.9	415.9	288.5	16426	17482.6	14152.9	15788.5		4.39578	4.8054	9.03641	9.95888	0.256947	0.278811	8.50902	8.16761	6.06628	6.54967
P28066	FALSE	Proteasome subunit alpha type-5 OS=Homo sapiens OX=9606 GN=PSMA5 PE=1 SV=3	PSMA5		31	7	1224.3	1462	2624.2	3190.3	129.5	130.1	2088.1	2876.1	2470.9	2371.8		41	7	4785	4060	350.8	301.9	7018.5	6219.2		36	6	1303.8	1266	768.9	833.2	70.4	53.5	2971	4091.3	883.4	1076.1		0.569999	0.643826	1.33438	1.44488	0.0321276	0.0351213	1.32628	1.18534	1.11027	1.10055
P28070	FALSE	Proteasome subunit beta type-4 OS=Homo sapiens OX=9606 GN=PSMB4 PE=1 SV=4	PSMB4		55	8	3254.7	3749.7	669	836.5	47.7	51.5	6597.3	8499.7	635.7	610.3		48	7	5596.4	5718.8	339.4	267.9	4180.1	3229.5		15	4	525.6	502.1	1056.7	1186.5	60.1	47.9	592	806.9	517.4	618.3		1.51529	1.65127	0.340181	0.37885	0.0118339	0.0139028	4.19036	3.50301	0.285644	0.283189
P28072	FALSE	Proteasome subunit beta type-6 OS=Homo sapiens OX=9606 GN=PSMB6 PE=1 SV=4	PSMB6		20	6	1332.3	1259.6	470.8	560	31.9	25.9	3856.7	5000.5	880.5	679.7		45	8	5398.8	5349.8	336.3	296.8	16128.5	11979.3															0.62028	0.554694	0.239398	0.253623	0.00791406	0.00699187	2.44963	2.06087	0.395641	0.315391
P28074	FALSE	Proteasome subunit beta type-5 OS=Homo sapiens OX=9606 GN=PSMB5 PE=1 SV=3	PSMB5		111	13	9498.1	11126.7	2714.6	3341.6	165.4	153.4	14735.2	20369.8	2531.1	2381.1		121	13	15281.8	14518.4	1073	865.6	16105.7	13853.1		34	10	1241.5	1044.6	1092.5	1228.6	116.9	84.3	1852.6	2210.8	1231.3	1417.6		4.42204	4.8999	1.38035	1.51341	0.041034	0.0414113	9.35925	8.39507	1.13732	1.10487
P28161	FALSE	Glutathione S-transferase Mu 2 OS=Homo sapiens OX=9606 GN=GSTM2 PE=1 SV=2	GSTM2		4	2	762.8	967.7	1272.8	1614.1	63.8	73.4	353.9	490.9	838	798.7		6	2	1030.8	898.3	88.7	66.3	1403.5	1073.8		6	2	228	187.4	305.8	397.3	18.8	14.8	372.9	486	87.5	103.6		0.355138	0.426149	0.647208	0.731024	0.0158281	0.0198148	0.224784	0.202316	0.376545	0.370609
P28288	TRUE	ATP-binding cassette sub-family D member 3 OS=Homo sapiens OX=9606 GN=ABCD3 PE=1 SV=1	ABCD3		43	12	959.2	1008	5866.5	7457.5	282.5	270.1	2090.5	2935.5	6175.4	5194.2		50	13	3334.4	3110.5	274.2	231.6	11713.7	10649.8		28	7	2811.2	2646.7	1382.3	1301.8	87.9	71.3	2950.8	3318.8	2549	2985.5		0.446576	0.443896	2.98307	3.37749	0.0700853	0.0729153	1.32781	1.20982	2.77484	2.41019
P28331	FALSE	NADH-ubiquinone oxidoreductase 75 kDa subunit, mitochondrial OS=Homo sapiens OX=9606 GN=NDUFS1 PE=1 SV=3	NDUFS1		6	2	189.1	182.3	330.6	415.9	29	17.6	238.5	322.6	270.9	236.6		8	4	374	335.8	39	34	809.1	645.6		17	7	777.5	740.9	499.8	463.4	49.7	44.1	1151.7	1266.1	420.5	504		0.0880395	0.0802801	0.168107	0.188361	0.0071946	0.00475124	0.151486	0.132954	0.121725	0.109786
P28482	FALSE	Mitogen-activated protein kinase 1 OS=Homo sapiens OX=9606 GN=MAPK1 PE=1 SV=3	MAPK1		29	8	718.4	889.5	1276.9	1534.1	80.2	69.8	2010.2	2685.3	905.3	815		18	4	1102.5	1001.8	94.4	81.5	2021.6	1747.1		28	9	1094.1	1029.7	847.8	926	77.2	60.3	2031.8	2469.5	590.5	735.7		0.334466	0.391712	0.649293	0.694792	0.0198968	0.018843	1.2768	1.1067	0.406785	0.378173
P28838	FALSE	Cytosol aminopeptidase OS=Homo sapiens OX=9606 GN=LAP3 PE=1 SV=3	LAP3		7	4	73.8	91.2	159.3	202.6	15.4	13.8	86.7	113.9	121.4	134.1		6	4	250.8	174.4	24.2	21.7	322.1	325.3		27	10	2409.5	2279.1	1420.8	1319.4	123.5	80.5	3445.9	3975	894.1	1063.9		0.0343591	0.0401621	0.0810027	0.0917572	0.00382058	0.0037254	0.0550686	0.046942	0.0545495	0.0622245
P29372	FALSE	DNA-3-methyladenine glycosylase OS=Homo sapiens OX=9606 GN=MPG PE=1 SV=3	MPG		7	3	35.5	43.2	101	132.8		4.9	54.1	74.5	36	39.6		3	2	343	294.3	33.8	28.6	435.3	398.8															0.0165278	0.0190241	0.0513577	0.0601449		0.00132279	0.0343623	0.0307039	0.0161761	0.018375
P29401	FALSE	Transketolase OS=Homo sapiens OX=9606 GN=TKT PE=1 SV=3	TKT		22	10	628	736	1818	2103.6	166.6	148.3	820.6	1060.4	1339.2	1224.5		42	14	5559.1	4474.3	671.6	611.6	7642.2	6885.7		65	20	7158.2	6573.5	3797.1	4087.5	412.6	366.5	9811.1	13140.2	2943.9	3503.9		0.292379	0.324115	0.924438	0.952717	0.0413317	0.0400346	0.521214	0.437026	0.601752	0.568187
P29558	FALSE	RNA-binding motif, single-stranded-interacting protein 1 OS=Homo sapiens OX=9606 GN=RBMS1 PE=1 SV=3	RBMS1		8	2	233	292.4	298.9	378.9	25.2	23.4	722.5	951.9	211.3	245.1		13	3	790.1	658.9	51.1	40.2	2169.9	2091.2															0.108478	0.128765	0.151988	0.171603	0.00625186	0.00631698	0.458905	0.39231	0.094945	0.11373
P29692	FALSE	Elongation factor 1-delta OS=Homo sapiens OX=9606 GN=EEF1D PE=1 SV=5	EEF1D		40	7	4467.1	5180	3024.7	3866.7	173.9	144.9	2776.6	3660.1	2453.1	2732.5		100	5	4626.9	4041	325.1	269	6848.4	6326.3		42	7	3543	3023.5	2758.8	2968.2	139	98.3	7299.1	9276.8	1779.9	2070.4		2.07975	2.28113	1.53804	1.75122	0.0431428	0.0391167	1.76359	1.50845	1.10227	1.26792
P29966	FALSE	Myristoylated alanine-rich C-kinase substrate OS=Homo sapiens OX=9606 GN=MARCKS PE=1 SV=4	MARCKS		34	5	1013.5	1332.9	5519.7	7004.3	283.5	292.5	966.2	1236.5	2642.5	2632		47	5	4580.6	3493.5	339.5	228.9	7647.7	6718.5		40	6	5107.7	4332.2	2415.7	2044.2	126.6	99.5	4363.9	4200.2	1918.6	2174.5		0.471856	0.586974	2.80672	3.17224	0.0703334	0.0789623	0.613694	0.509603	1.18737	1.22129
P30040	FALSE	Endoplasmic reticulum resident protein 29 OS=Homo sapiens OX=9606 GN=ERP29 PE=1 SV=4	ERP29		15	6	680.3	860	1382.9	1438.1	78.7	74	1328.7	1681.6	815.7	814.9		25	5	608.3	519.3	31	21.9	2004.3	1704		21	7	1236.1	1081.1	582.9	549.4	38.8	16.5	1645.3	1748.6	596.8	701.2		0.316728	0.378721	0.703193	0.651313	0.0195247	0.0199768	0.843941	0.693043	0.366524	0.378126
P30041	FALSE	Peroxiredoxin-6 OS=Homo sapiens OX=9606 GN=PRDX6 PE=1 SV=3	PRDX6		30	11	1458.3	1705.8	4674.8	6085.6	269.5	244	1852.3	2469	2529.7	2358.3		51	11	5168.6	4179.7	417.3	327.5	9352.5	7334.4		43	11	4880.7	4403.1	2856.7	3202.7	219.2	172.8	4883.4	6805.8	1775.1	2171		0.678942	0.751189	2.3771	2.75616	0.0668602	0.0658694	1.17651	1.01756	1.13669	1.09429
P30043	FALSE	Flavin reductase (NADPH) OS=Homo sapiens OX=9606 GN=BLVRB PE=1 SV=3	BLVRB		3	2												4	2	433.8	394.3	38.7	39.8	308.9	293.3		3	2	41.3	28.7	54.8	69.1	4.9	4.9	60	69.7	37.7	48.2
P30044	FALSE	Peroxiredoxin-5, mitochondrial OS=Homo sapiens OX=9606 GN=PRDX5 PE=1 SV=4	PRDX5		25	7	323	386.1	1907	2547.6	106.9	115.6	435	542.4	849.8	868.1		18	4	930.5	685.7	87.5	71.9	1642.9	1521.3		29	5	2422.1	2084.9	1000.1	1006.8	75.7	62	3379.2	3941.9	874	957.5		0.150379	0.170028	0.969694	1.1538	0.0265208	0.031207	0.276296	0.223541	0.381847	0.402812
P30046	FALSE	D-dopachrome decarboxylase OS=Homo sapiens OX=9606 GN=DDT PE=1 SV=3	DDT		16	3	174.2	189.5	3034.2	4112	155.3	199.7	190.9	219.9	716.4	693.5											5	3	539.6	591.1	140.7	152	24.7	18.6	365.8	463.2	128.5	155.4		0.0811025	0.0834508	1.54287	1.86232	0.0385283	0.0539103	0.121253	0.0906281	0.321905	0.321795
P30048	FALSE	Thioredoxin-dependent peroxide reductase, mitochondrial OS=Homo sapiens OX=9606 GN=PRDX3 PE=1 SV=3	PRDX3		29	7	2163	2427.9	3714.9	4713	189.4	208.7	3206.5	4071.1	1964	1886.3		65	7	8655.1	7548.5	605	467.2	22914	18918.5		51	10	5494.7	4701.1	2423.5	2302.9	158.5	104.5	5994.5	6467.2	1886.3	1981.1		1.00703	1.06918	1.889	2.13451	0.0469882	0.0563399	2.03665	1.67784	0.882498	0.875273
P30049	FALSE	ATP synthase subunit delta, mitochondrial OS=Homo sapiens OX=9606 GN=ATP5F1D PE=1 SV=2	ATP5D																								7	2	795.1	648.8	273.3	282.4	20.2	13.6	1333.7	1489.6	333.2	395.4
P30050	FALSE	60S ribosomal protein L12 OS=Homo sapiens OX=9606 GN=RPL12 PE=1 SV=1	RPL12		28	6	1172.5	1324.3	2616.1	3533.6	270.5	272.6	1461.6	2068.1	2213.2	1972.6		30	5	1269.2	905.5	184.5	136.6	1843.4	1605.3		35	7	1766.8	1464.3	787.7	831.9	119.9	110.6	2465.4	3045.3	610.7	651		0.545882	0.583187	1.33027	1.60036	0.0671083	0.0735902	0.928354	0.852333	0.994473	0.915317
P30084	FALSE	Enoyl-CoA hydratase, mitochondrial OS=Homo sapiens OX=9606 GN=ECHS1 PE=1 SV=4	ECHS1		28	11	1005.4	1113.8	3181	3811.7	211.5	203.6	1880.8	2593	2367.6	2085.2		23	8	3295.4	2839.1	332.8	319.9	8100.9	6945.7		31	9	4040.8	3469.7	1911.9	1924.4	218.6	172.3	6986.4	7682.6	1565.8	1696		0.468085	0.490488	1.61751	1.72631	0.052471	0.0549632	1.19461	1.06866	1.06385	0.967565
P30085	FALSE	UMP-CMP kinase OS=Homo sapiens OX=9606 GN=CMPK1 PE=1 SV=3	CMPK1		8	3	377.8	406.6	623.8	760.7	42	36.9	685.6	869.2	510.6	419.1		6	3	710	634.9	75.2	64.3	1250.8	1006.7		4	2	406.2	328	144.2	154.6	18	20.4	487.5	618.4	147.9	149.9		0.175893	0.179056	0.317197	0.34452	0.0104198	0.0099614	0.435467	0.358226	0.229432	0.194469
P30086	FALSE	Phosphatidylethanolamine-binding protein 1 OS=Homo sapiens OX=9606 GN=PEBP1 PE=1 SV=3	PEBP1		28	7	1875.8	1793.1	3116.7	4086.6	211.6	204.5	4895.7	4711.7	2405.4	1816.8		96	9	9212.1	8532.4	696.2	574	28121.5	22695.7		36	8	3520.7	3083.8	3499.2	4556	256.1	259.2	3132	3484.6	2931.5	3416.9		0.873318	0.789634	1.58482	1.85082	0.0524958	0.0552061	3.10957	1.94185	1.08084	0.843024
P30101	FALSE	Protein disulfide-isomerase A3 OS=Homo sapiens OX=9606 GN=PDIA3 PE=1 SV=4	PDIA3		45	19	2244.5	2380.8	4106.9	5411	275.6	266.9	2211.3	2995	2727.7	2626		86	18	8158.5	7148.3	748.4	623.7	13374.5	12136		95	27	8287.8	7659.1	4955.8	4629.6	310.5	222.2	11779.3	13320.8	4238.7	4976.2		1.04497	1.04844	2.08833	2.45063	0.0683735	0.0720514	1.40454	1.23434	1.22566	1.2185
P30153	FALSE	Serine/threonine-protein phosphatase 2A 65 kDa regulatory subunit A alpha isoform OS=Homo sapiens OX=9606 GN=PPP2R1A PE=1 SV=4	PPP2R1A		52	18	3012.5	3021.6	2883.2	3827	204	206.2	2884.4	4172.2	2803.8	2297.9		81	17	10914.2	10921	783.5	708.9	21200.1	16933		43	14	3244.7	2958.6	2791.5	3084.7	204.4	173	5822.9	7418.8	1851.6	2163.2		1.40253	1.33063	1.46608	1.73324	0.0506103	0.055665	1.83206	1.7195	1.25985	1.06626
P30154	FALSE	Serine/threonine-protein phosphatase 2A 65 kDa regulatory subunit A beta isoform OS=Homo sapiens OX=9606 GN=PPP2R1B PE=1 SV=3	PPP2R1B															14	2	469.5	436.1	44.8	33.2	779	659.6
P30260	FALSE	Cell division cycle protein 27 homolog OS=Homo sapiens OX=9606 GN=CDC27 PE=1 SV=2	CDC27		10	5	277.5	356.1	225.8	268.6	26.6	17.4	494.6	565.4	150.9	177.8		16	8	584.4	556.1	44.7	45.3	768	651.4															0.129196	0.156817	0.114817	0.121649	0.00659919	0.00469724	0.314151	0.23302	0.067805	0.082502
P30307	FALSE	M-phase inducer phosphatase 3 OS=Homo sapiens OX=9606 GN=CDC25C PE=1 SV=2	CDC25C		3	2	168.1	183.6	236.2	330.8	7.3	11.2	283.5	422.2	102.1	96.4																								0.0782625	0.0808526	0.120106	0.149819	0.00181105	0.00302351	0.180069	0.174003	0.0458773	0.0447311
P30405	FALSE	Peptidyl-prolyl cis-trans isomerase F, mitochondrial OS=Homo sapiens OX=9606 GN=PPIF PE=1 SV=1	PPIF		8	3	166.6	173.6	455.2	518.7	39.9	29.9	184.1	243.2	364.5	294.7		4	2								14	3	755.7	624.2	364.5	337.5	43.8	31.3	1410.5	1478.9	297.5	316.8		0.0775641	0.0764488	0.231465	0.234918	0.00989878	0.0080717	0.116933	0.100231	0.163783	0.136745
P30419	FALSE	Glycylpeptide N-tetradecanoyltransferase 1 OS=Homo sapiens OX=9606 GN=NMT1 PE=1 SV=2	NMT1		28	7	2426.3	3285.3	1499.6	1913.9	150.1	124.5	2322.8	3411.1	1001.9	1105.9		52	9	6723.6	5913.2	536.3	448	10127.9	10068.5		39	7	1968.3	2023.2	4420.8	4677.5	245.8	207.3	2154.9	2163.4	2118	2333.2		1.12961	1.44676	0.762534	0.866803	0.0372383	0.0336096	1.47536	1.40583	0.450191	0.513155
P30519	FALSE	Heme oxygenase 2 OS=Homo sapiens OX=9606 GN=HMOX2 PE=1 SV=2	HMOX2		135	19	9555.7	10108.1	11934.7	15057	458.2	549.8	9105	12578.1	13100.1	11248.8		346	22	35479.4	33629.6	2174.4	1744.7	74257.6	61564		103	18	3299.9	3067.9	5612.5	5369.3	221.3	173.8	4637.1	4738.2	13280.4	14649.5		4.44886	4.45134	6.0687	6.81929	0.113675	0.148422	5.78316	5.18385	5.88636	5.21962
P30520	FALSE	Adenylosuccinate synthetase isozyme 2 OS=Homo sapiens OX=9606 GN=ADSS PE=1 SV=3	ADSS		22	11	548.5	636	838.4	1118.9	49.3	56.7	610.2	789.5	489.8	496.9		39	12	2495.3	2367.2	169.8	151.7	3287.7	2697.9		12	6	730.3	626.8	491.4	484.3	32.4	29.1	1155.9	1566.7	347	397.8		0.255366	0.280078	0.42632	0.506748	0.0122308	0.0153065	0.387576	0.325379	0.220085	0.230569
P30536	TRUE	Translocator protein OS=Homo sapiens OX=9606 GN=TSPO PE=1 SV=3	TSPO		13	2	146.1	161.5	672.5	726.8	16.6	20.5	1138.6	1415.4	597.8	407.5		16	3	1896.1	1769	100.1	71.7	4472.4	3365															0.0680199	0.0711203	0.341961	0.329167	0.00411829	0.00553411	0.723196	0.583333	0.268614	0.189086
P30566	FALSE	Adenylosuccinate lyase OS=Homo sapiens OX=9606 GN=ADSL PE=1 SV=2	ADSL		16	5	957.6	1074.5	2113.4	2592.8	138.6	137.1	950.3	1365.3	1242.8	1163.2		14	3	2130	1962.7	229.2	199.7	3201.4	2876.1		10	6	1146.7	1026.2	738.7	771.7	66.6	51.7	1781.8	2306.6	626	693.9		0.445831	0.473181	1.07465	1.17428	0.0343852	0.037011	0.603595	0.562685	0.558436	0.539743
P30626	FALSE	Sorcin OS=Homo sapiens OX=9606 GN=SRI PE=1 SV=1	SRI		14	7	559.4	700.3	908	1053	51.6	53.5	957.8	1210	718.6	702.3		16	5	1643.1	1525.6	151.8	137.1	3550.8	2812.2		5	3	307.1	279.5	253	289	16.7	15.1	679.8	778.5	179.9	219.4		0.26044	0.308394	0.461711	0.476902	0.0128014	0.0144427	0.608359	0.498681	0.322894	0.325878
P30825	TRUE	High affinity cationic amino acid transporter 1 OS=Homo sapiens OX=9606 GN=SLC7A1 PE=1 SV=1	SLC7A1		18	4	602.6	640.3	1085.8	1286.1	48.8	56	636.1	870.3	853.8	764.6		16	5	776.9	703.9	52.6	49.1	2216.8	1759.4		7	2												0.280553	0.281971	0.55212	0.582473	0.0121068	0.0151176	0.404027	0.35868	0.383644	0.354786
P30837	FALSE	Aldehyde dehydrogenase X, mitochondrial OS=Homo sapiens OX=9606 GN=ALDH1B1 PE=1 SV=3	ALDH1B1		134	20	24093.6	27812.3	4910.3	5726	322.7	297.4	9641.4	13366.6	6652.3	6224.6		116	19	15538.4	15735.9	1079.8	899.3	13531.5	11326.9		37	9	1550.1	1372.3	2587.6	2586.4	200.4	129.2	2714.3	3077.1	1127.3	1328.2		11.2173	12.2478	2.49685	2.5933	0.0800585	0.0802851	6.12386	5.50882	2.98913	2.88831
P30876	FALSE	DNA-directed RNA polymerase II subunit RPB2 OS=Homo sapiens OX=9606 GN=POLR2B PE=1 SV=1	POLR2B		5	4	81.3	78.9	84.6	121.3	5.8	8.6	116.9	168.7	81.2	64.7		13	6	1447.6	1360	109.4	96.3	2253.3	2098.3															0.0378509	0.0347455	0.0430184	0.0549366	0.00143892	0.00232163	0.0742505	0.0695269	0.0364862	0.0300218
P31040	FALSE	Succinate dehydrogenase [ubiquinone] flavoprotein subunit, mitochondrial OS=Homo sapiens OX=9606 GN=SDHA PE=1 SV=2	SDHA		19	9	538.7	622.9	1736	2098.3	90.3	94.9	815.6	1100.7	1537	1294.8		17	7	1689.5	1466.3	144.2	139.4	3696.8	3093.3		24	8	2326.1	2184.7	1168.4	1174.9	105.5	87.9	4079.3	4422.1	1259.8	1434.1		0.250803	0.274309	0.882742	0.950317	0.0224025	0.0256189	0.518039	0.453635	0.690631	0.600807
P31150	FALSE	Rab GDP dissociation inhibitor alpha OS=Homo sapiens OX=9606 GN=GDI1 PE=1 SV=2	GDI1		39	5	933.9	1095.9	956.6	1241	63	62.2	661.5	977.7	855.4	813.5		39	4	1535	1524.7	138.5	122.5	2661	2136.1		39	5	851.9	736.6	468.1	479.3	47.8	30.1	1704.2	2277	339.9	413.2		0.434797	0.482605	0.486423	0.562047	0.0156297	0.0167913	0.42016	0.402943	0.384363	0.377477
P31153	FALSE	S-adenosylmethionine synthase isoform type-2 OS=Homo sapiens OX=9606 GN=MAT2A PE=1 SV=1	MAT2A		15	6	802.4	920.4	1786.4	2436.4	107.9	104.8	1055	1323.4	978.5	1050.2		14	5	1412.4	1183	134.9	109.5	1687.2	1618.2		24	8	2506.8	2201	1348.6	1341	106	97.1	3819.1	4835.3	900.5	1052		0.373574	0.40532	0.90837	1.10344	0.0267689	0.0282914	0.670097	0.545417	0.439676	0.487309
P31350	FALSE	Ribonucleoside-diphosphate reductase subunit M2 OS=Homo sapiens OX=9606 GN=RRM2 PE=1 SV=1	RRM2		39	12	1297.5	1637.3	840.3	980.8	40.1	40	6613.4	10052.7	656.9	622.9		29	8	3620.3	3299.9	233.6	184.4	6179.6	5411.2		9	5	255.1	229.6	186.8	204.8	18.7	11.6	411.1	502.5	221.5	290.9		0.604078	0.721023	0.427286	0.444203	0.0099484	0.0107983	4.20058	4.14305	0.29517	0.289035
P31483	FALSE	Nucleolysin TIA-1 isoform p40 OS=Homo sapiens OX=9606 GN=TIA1 PE=1 SV=3	TIA1															8	3	57.5	60.3	4.4	3.6	127.8	119.4
P31689	FALSE	DnaJ homolog subfamily A member 1 OS=Homo sapiens OX=9606 GN=DNAJA1 PE=1 SV=2	DNAJA1		40	11	1955	2098.3	4927.7	6630.6	257.9	249.5	3267.8	4467.2	3112.4	2826		73	12	8180.2	8005.7	692.3	600	16832.1	15042.6		27	10	1501.4	1356.7	1454.1	1447.8	97.5	69.4	2711.6	3251.7	1898	2267.7		0.910191	0.924036	2.5057	3.00299	0.0639823	0.0673542	2.07558	1.84108	1.39852	1.31131
P31749	FALSE	RAC-alpha serine/threonine-protein kinase OS=Homo sapiens OX=9606 GN=AKT1 PE=1 SV=2	AKT1		2	2	320.4	362.8	191.7	269.7	9.5	7.4	452.1	717.4	117.3	113.7																								0.149169	0.159767	0.0974779	0.122147	0.00235685	0.00199768	0.287157	0.295664	0.0527073	0.0527586
P31930	FALSE	Cytochrome b-c1 complex subunit 1, mitochondrial OS=Homo sapiens OX=9606 GN=UQCRC1 PE=1 SV=3	UQCRC1		62	14	2452.5	2892.6	5099.5	6250.6	391.6	362.6	5377.4	7502	4138.6	4086.6		82	12	8280.4	7425.5	694.8	609	18422.1	16868.3		79	10	4999	4634.7	4730.7	4836	1232.9	1119.3	7937.7	8768.6	4947.4	5413.1		1.14181	1.27382	2.59305	2.83089	0.0971519	0.0978862	3.41552	3.09182	1.85963	1.89625
P31937	FALSE	3-hydroxyisobutyrate dehydrogenase, mitochondrial OS=Homo sapiens OX=9606 GN=HIBADH PE=1 SV=2	HIBADH																								5	2	466.9	384.5	196.7	181.6	41.1	36.2	1042.8	1136.7	174.3	170.3
P31939	FALSE	Bifunctional purine biosynthesis protein PURH OS=Homo sapiens OX=9606 GN=ATIC PE=1 SV=3	ATIC		61	16	4342.3	5557.1	3770.1	4834	257.7	256.8	2023.6	3063.5	2834.7	3068.3		107	20	12298.5	11343.5	984.7	790.5	24533.7	22925.1		81	14	4134.3	3566.2	2338	2511.7	231.8	185.9	6560.4	9469	2470.8	2918.9		2.02165	2.4472	1.91706	2.18931	0.0639327	0.0693248	1.28532	1.26257	1.27374	1.42374
P31942	FALSE	Heterogeneous nuclear ribonucleoprotein H3 OS=Homo sapiens OX=9606 GN=HNRNPH3 PE=1 SV=2	HNRNPH3		76	9	3982.7	4575.9	2319	2830.3	125.4	114.8	8024.2	11231	2133.1	2104.4		118	9	9137.3	8790.8	562.8	476.5	23647	18685.3		35	7	1559.4	1393.8	1593.3	1621.9	107	80.3	4638.3	5450.4	1602	1685.5		1.85423	2.0151	1.17919	1.28184	0.0311104	0.030991	5.09667	4.62867	0.958481	0.976474
P31943	FALSE	Heterogeneous nuclear ribonucleoprotein H OS=Homo sapiens OX=9606 GN=HNRNPH1 PE=1 SV=4	HNRNPH1		234	7	10844.2	11454.4	5274.1	6721.3	346.8	265.6	16678.8	23625	5079.3	4436		504	8	31021.9	31139	2107.9	1834.3	61097.9	48721.6		89	5	3025.9	3042.2	4231	4316	299.8	219.7	8137.3	8926.3	3181.1	3698.3		5.04875	5.04421	2.68184	3.04407	0.0860375	0.0717005	10.5938	9.73665	2.28232	2.05837
P31946	FALSE	14-3-3 protein beta/alpha OS=Homo sapiens OX=9606 GN=YWHAB PE=1 SV=3	YWHAB		116	6	3311	3417.7	5029.7	5960.7	250.8	225.1	4720.8	5950.9	5322.8	4270.8		215	6	8379.8	7535.2	541.8	437	22168.4	19229.4		111	6	3838.8	3272.2	1950.2	1956.3	154.8	114.5	6163.3	8471.2	1873.6	1986.9		1.54151	1.50506	2.55756	2.69959	0.0622209	0.0607672	2.99848	2.45256	2.39173	1.98172
P31948	FALSE	Stress-induced-phosphoprotein 1 OS=Homo sapiens OX=9606 GN=STIP1 PE=1 SV=1	STIP1		145	41	12914.4	14241.1	12492.2	16249.8	942.2	880.9	18375.6	24744.3	9905	10190.4		227	40	28648.2	26583.7	2229.5	1913.2	54717.5	48873.4		181	41	14738.9	13609.9	9345.7	10006.3	752.5	601	22228.8	25287.3	7304.4	8524.5		6.01257	6.2714	6.35218	7.35951	0.23375	0.237805	11.6715	10.1979	4.45069	4.7285
P31949	FALSE	Protein S100-A11 OS=Homo sapiens OX=9606 GN=S100A11 PE=1 SV=2	S100A11		3	2	53	46.1	186.3	252.7	7.7	10.6	31.1	42.4	127.8	79.7		2	2	159	155.9	14.3	13.9	350.2	254.7															0.0246753	0.0203012	0.094732	0.114447	0.00191029	0.00286154	0.0197536	0.0174744	0.0574253	0.036982
P32119	FALSE	Peroxiredoxin-2 OS=Homo sapiens OX=9606 GN=PRDX2 PE=1 SV=5	PRDX2		36	9	4669.5	4712.4	4357.7	5756.8	250.8	247.5	3710.7	4740.7	3256.9	2659.6		50	8	8207.9	7440.3	605.8	499.3	15652.4	13080.1		43	8	3545.4	3059.1	3102	3385.9	216	172.6	5112.7	6359.8	1848.1	2113.1		2.17398	2.07522	2.21585	2.60725	0.0622209	0.0668142	2.3569	1.9538	1.46345	1.2341
P32189-1	FALSE	Isoform 1 of Glycerol kinase OS=Homo sapiens OX=9606 GN=GK	GK		5	3	161.4	175.6	188	224.6	13.9	8.2	248.6	329	157.9	141.1		2	2	52.7	36.7	4.5	3.8	205	160.2															0.0751432	0.0773296	0.0955965	0.101721	0.00344845	0.00221364	0.157901	0.135592	0.0709503	0.0654726
P32322	FALSE	Pyrroline-5-carboxylate reductase 1, mitochondrial OS=Homo sapiens OX=9606 GN=PYCR1 PE=1 SV=2	PYCR1		5	2	133.7	150.5	724.8	841.8	51.2	37.9	219.8	297.8	451.7	465.5		12	3	615	504.6	69.4	59.9	1396.1	1225		23	7	589.6	527.2	400.8	365.9	32.2	18.8	1355.2	1521.1	325	345.9		0.0622468	0.0662762	0.368555	0.38125	0.0127022	0.0102314	0.139609	0.122733	0.202966	0.215999
P32929	FALSE	Cystathionine gamma-lyase OS=Homo sapiens OX=9606 GN=CTH PE=1 SV=3	CTH		4	2	499.5	743.4	287.4	325.6	19.7	23	425	627.7	276.4	291.4		5	2	901.5	798.7	68.5	68.6	1566.5	1393		7	4	716.6	659.1	684.7	802.6	51.2	47.7	874.3	1202.6	503.9	552.4		0.232553	0.327374	0.146141	0.147464	0.00488737	0.006209	0.269944	0.258696	0.124197	0.135214
P32969	FALSE	60S ribosomal protein L9 OS=Homo sapiens OX=9606 GN=RPL9 PE=1 SV=1	RPL9		6	4	227.7	278	429	555.4	23.2	30.4	227.9	275.5	364.5	362.9		10	3								14	7	1574.9	1467.7	889.4	853.4	139.9	118.7	3415	3746.3	666.8	779.2		0.106011	0.122424	0.218143	0.25154	0.00575568	0.00820668	0.144754	0.113543	0.163783	0.168391
P33121	TRUE	Long-chain-fatty-acid--CoA ligase 1 OS=Homo sapiens OX=9606 GN=ACSL1 PE=1 SV=1	ACSL1		8	5												14	7	198	181.6	20.7	15	603.7	562.3		4	3
P33176	FALSE	Kinesin-1 heavy chain OS=Homo sapiens OX=9606 GN=KIF5B PE=1 SV=1	KIF5B		12	8	340.3	421	340.9	452.6	23.1	26.7	287.7	408	209.4	219.8		40	11	4934.7	4823.7	350.1	302.3	5836.9	5182.7		13	6	430.8	381.6	384.4	367.6	23.8	21.7	532.8	703.9	260.3	298.4		0.158434	0.185397	0.173345	0.204982	0.00573087	0.00720784	0.182736	0.16815	0.0940912	0.101991
P33240	FALSE	Cleavage stimulation factor subunit 2 OS=Homo sapiens OX=9606 GN=CSTF2 PE=1 SV=1	CSTF2		13	5	473.7	553.1	819.6	1018.1	59.6	39.3	819.6	1092.4	473	503.1		12	3	510.8	453.1	44.3	36.6	1276	1160.2		10	3	301.4	308.3	264.8	261.9	21.6	13.7	633.7	756.6	248.8	296.4		0.220541	0.243571	0.41676	0.461096	0.0147861	0.0106093	0.520579	0.450214	0.212537	0.233446
P33316	FALSE	Deoxyuridine 5'-triphosphate nucleotidohydrolase, mitochondrial OS=Homo sapiens OX=9606 GN=DUT PE=1 SV=4	DUT		34	6	828.3	1032.5	3040.4	4185.9	216.4	222	970.3	1268.7	1490.5	1492.1		22	6	1209.9	1114.5	155.3	140	1605.4	1251.9		21	3	690.4	567.3	313.4	352.6	49.5	34.2	847.7	1037.1	244.9	297.3		0.385632	0.454686	1.54602	1.89579	0.0536866	0.0599304	0.616298	0.522873	0.669737	0.692358
P33897	TRUE	ATP-binding cassette sub-family D member 1 OS=Homo sapiens OX=9606 GN=ABCD1 PE=1 SV=2	ABCD1		12	5	370.2	427.8	1109.7	1316.4	59.3	58.9	715.9	934.9	941.1	898.7		23	9	934.2	894.9	73.5	50.7	3158.4	2974.6															0.172354	0.188392	0.564273	0.596196	0.0147117	0.0159004	0.454713	0.385303	0.422871	0.417011
P33908	TRUE	Mannosyl-oligosaccharide 1,2-alpha-mannosidase IA OS=Homo sapiens OX=9606 GN=MAN1A1 PE=1 SV=3	MAN1A1		8	4	15	18.2	36.9	45.4	3.2	2.3	7.9	15.4	17.2	21.5		8	4	482.7	438.7	41.8	31	938.4	942.2															0.00698357	0.0080148	0.0187633	0.0205616	0.000793887	0.0006209	0.00501778	0.00634685	0.0077286	0.00997634
P33981	FALSE	Dual specificity protein kinase TTK OS=Homo sapiens OX=9606 GN=TTK PE=1 SV=2	TTK		5	3	149.8	164.1	288.2	385.3	15.9	16.7	200.3	273.9	109.6	113.2																								0.0697425	0.0722653	0.146547	0.174502	0.00394463	0.00450827	0.127223	0.112883	0.0492474	0.0525266
P33991	FALSE	DNA replication licensing factor MCM4 OS=Homo sapiens OX=9606 GN=MCM4 PE=1 SV=5	MCM4		42	16	3884.9	4611	2083	2569.1	175.3	149.4	2750.4	3752.3	1801.8	1942.1		86	24	9228.3	8465.9	810.4	691.1	12903.1	11773.9		36	13	3234.4	3109	2216.6	2267.7	235.4	192.4	4535	5605	1520.4	1802.9		1.8087	2.03056	1.05919	1.16354	0.0434901	0.0403315	1.74695	1.54645	0.809616	0.901165
P33992	FALSE	DNA replication licensing factor MCM5 OS=Homo sapiens OX=9606 GN=MCM5 PE=1 SV=5	MCM5		24	11	814.4	842.1	1015.1	1238.4	60.4	59.7	731	1002.4	1008.5	884.8		52	16	2726.8	2647.5	283.2	240.2	3405.3	2791.6		29	12	618	559.9	483.5	495.2	50.9	37.7	1057.7	1352.8	367.6	389.5		0.379161	0.370838	0.51617	0.56087	0.0149846	0.0161164	0.464304	0.413122	0.453157	0.410561
P33993	FALSE	DNA replication licensing factor MCM7 OS=Homo sapiens OX=9606 GN=MCM7 PE=1 SV=4	MCM7		42	20	2444.7	2559.3	1435.1	1873.5	145.4	133.2	1580.9	2296.1	1440.7	1362.4		59	21	6740	6416	556.6	484.9	6178	5710.7		47	17	1832.4	1749.5	2381.3	2422.5	148.2	125.5	3939.5	4920.8	1199.9	1417.7		1.13818	1.12705	0.729737	0.848505	0.0360722	0.0359582	1.00413	0.946299	0.64736	0.632175
P34059	FALSE	N-acetylgalactosamine-6-sulfatase OS=Homo sapiens OX=9606 GN=GALNS PE=1 SV=1	GALNS															3	2
P34897	FALSE	Serine hydroxymethyltransferase, mitochondrial OS=Homo sapiens OX=9606 GN=SHMT2 PE=1 SV=3	SHMT2		75	19	6303.7	7256	4098.6	4929.5	265.5	223.2	4958.1	7163.9	3995.8	3603.1		68	16	9094.3	8487.3	763.2	659.3	11139.3	9970.5		68	17	3823.1	3495.7	2719.9	2662.9	201.4	164.2	6716.2	7718.1	1956.1	2188.3		2.93482	3.19535	2.0841	2.23256	0.0658678	0.0602543	3.1492	2.95248	1.79546	1.67189
P34932	FALSE	Heat shock 70 kDa protein 4 OS=Homo sapiens OX=9606 GN=HSPA4 PE=1 SV=4	HSPA4		86	31	5407.2	6023.5	8676.6	11165.6	639.5	620.1	5069.1	6970.4	7982.8	7378.3		104	28	12164.9	11306.1	1147.6	992.8	16177.2	13226.4		113	28	11450.7	10600.5	5667.8	6234.9	668.4	547.4	13416	16489.8	3897.1	4622.2		2.51744	2.65259	4.41198	5.05688	0.158653	0.1674	3.2197	2.87273	3.58697	3.42365
P34949	FALSE	Mannose-6-phosphate isomerase OS=Homo sapiens OX=9606 GN=MPI PE=1 SV=2	MPI		9	6	147	200.9	101.6	119.6	3.9	7.1	94.6	143.3	72.5	84.7		48	10	4977.4	4698.2	372.9	320	3583.1	2987.7		11	3	592.9	538.9	448.3	500.2	48.4	32.5	1116	1354.6	366.8	443.2		0.0684389	0.088471	0.0516628	0.0541667	0.00096755	0.00191669	0.0600864	0.0590587	0.0325769	0.0393021
P35080	FALSE	Profilin-2 OS=Homo sapiens OX=9606 GN=PFN2 PE=1 SV=3	PFN2															10	2	60.5	58.7	7.2	7.5	180	123.6
P35080-2	FALSE	Isoform IIb of Profilin-2 OS=Homo sapiens OX=9606 GN=PFN2	PFN2		10	3	620.7	702.3	527.8	695.7	63.2	64.2	1490	1898.5	394.3	388.3		21	3	2218	2065.2	283	233.9	4656.7	3941.1															0.28898	0.309274	0.268382	0.315082	0.0156793	0.0173312	0.946392	0.782435	0.177174	0.180177
P35221	FALSE	Catenin alpha-1 OS=Homo sapiens OX=9606 GN=CTNNA1 PE=1 SV=1	CTNNA1		7	6	328.1	383.8	322.8	407.8	19.8	18.3	318.6	422.5	217.2	235.5		19	9	1323	1194.5	103.2	88.2	1884.4	1590.8		4	3	568.4	524.2	535.7	525.7	34.8	29.2	926.6	1108.1	367.3	414.5		0.152754	0.169015	0.164141	0.184692	0.00491218	0.0049402	0.202363	0.174126	0.097596	0.109276
P35222	FALSE	Catenin beta-1 OS=Homo sapiens OX=9606 GN=CTNNB1 PE=1 SV=1	CTNNB1		7	2	38	67.5	46.1	49.1			56.7	88.1	14.6	36		10	3	1013.7	927.7	91.3	83.3	1335.7	1211.7		7	2	414.4	370	506.7	521.7	156.5	42.3	780.3	1017.3	406.3	387		0.0176917	0.0297252	0.0234415	0.0222373			0.0360137	0.0363089	0.00656032	0.0167046
P35232	FALSE	Prohibitin OS=Homo sapiens OX=9606 GN=PHB PE=1 SV=1	PHB		90	17	2036.8	2185.7	17369	21858.3	605.3	674.9	2763.7	3609.3	14152.5	12414.4		128	16	9475.4	7767.2	751.6	632.8	48917.5	41495.2		104	15	13514.2	11657.6	3951.2	3614	187.2	153.8	17864.6	18231.9	16697.3	18210.5		0.948275	0.962524	8.83199	9.89959	0.150169	0.182194	1.7554	1.48751	6.35925	5.76048
P35237	FALSE	Serpin B6 OS=Homo sapiens OX=9606 GN=SERPINB6 PE=1 SV=3	SERPINB6		4	2	310.2	337	892	1165.9	58.8	56.1	320.5	416.4	638.2	540.1											12	4	259.2	238	144.9	157.5	14.9	10.8	459.8	607.1	116	124.1		0.14442	0.148406	0.453575	0.528034	0.0145877	0.0151446	0.20357	0.171612	0.286767	0.250615
P35241	FALSE	Radixin OS=Homo sapiens OX=9606 GN=RDX PE=1 SV=1	RDX		20	2	79.7	87.7	56.6	74.8	9	10.2	26.2	44.2	51.3	42.3		32	2	606.5	549.8	55.4	44.8	627.3	582.9		53	9	591.1	585.8	495.5	495.3	33.9	24.3	616.1	716.5	330.7	414.8		0.037106	0.0386208	0.0287806	0.0338768	0.00223281	0.00275356	0.0166413	0.0182163	0.023051	0.0196279
P35249	FALSE	Replication factor C subunit 4 OS=Homo sapiens OX=9606 GN=RFC4 PE=1 SV=2	RFC4		18	9	662.6	796.8	1692.6	1814.5	114.6	108.2	660.7	907.2	1120.4	972		22	7	1401	1228.3	173.5	151.2	2453.1	2135.7		22	8	1246.3	1079.2	914.7	827.7	80.3	58.9	2223.9	2664.9	762.9	925.3		0.308487	0.35089	0.860673	0.821784	0.0284311	0.0292093	0.419652	0.373887	0.503437	0.451023
P35250	FALSE	Replication factor C subunit 2 OS=Homo sapiens OX=9606 GN=RFC2 PE=1 SV=3	RFC2		24	7	1107.2	1360	1349.8	1656.6	89.7	84.9	4650.9	6217.1	832	899.1		13	5	452.3	401	34.5	25.7	751.6	645.8		11	5	674.3	585.8	548.6	584.5	42.9	40.5	1253.6	1470.4	375.3	440		0.51548	0.598908	0.686362	0.750272	0.0222536	0.0229193	2.95408	2.56227	0.373849	0.417196
P35251	FALSE	Replication factor C subunit 1 OS=Homo sapiens OX=9606 GN=RFC1 PE=1 SV=4	RFC1															4	3	238.1	238.8	24.8	20.2	234.1	249.2
P35268	FALSE	60S ribosomal protein L22 OS=Homo sapiens OX=9606 GN=RPL22 PE=1 SV=2	RPL22		10	3	545.5	507.6	613.7	807	45.7	41.6	529.8	659.7	554.1	407.7		21	4	4260.6	3726.6	574.9	488.9	6971.5	5405.3		18	4	1941.2	1775	1175.5	1068.6	80.2	74.4	2943.2	3597.7	1116.5	1264.6		0.253969	0.223534	0.312061	0.365489	0.0113377	0.0112302	0.336509	0.271884	0.248978	0.189179
P35269	FALSE	General transcription factor IIF subunit 1 OS=Homo sapiens OX=9606 GN=GTF2F1 PE=1 SV=2	GTF2F1															2	2
P35270	FALSE	Sepiapterin reductase OS=Homo sapiens OX=9606 GN=SPR PE=1 SV=1	SPR		3	2	155.9	194.8	299.8	375.1	20.8	19.3	109.8	137	238.7	213.6		6	2	427.5	372.2	36.9	36.3	640.6	607															0.0725825	0.0857847	0.152446	0.169882	0.00516027	0.00521016	0.0697409	0.0564622	0.107257	0.0991137
P35527	FALSE	Keratin, type I cytoskeletal 9 OS=Homo sapiens OX=9606 GN=KRT9 PE=1 SV=3	KRT9		14	5	267.8	343.2	106.6	86.1	228	48.7	209.2	54.3	177.6	286.2		72	15	5638.1	2033.7	11118.6	4736.9	4386.5	2569.5		67	17	1042.7	451.6	2360	879.9	6172	1623.9	643.3	2447.3	6539	1185.9		0.12468	0.151136	0.0542052	0.0389946	0.0565645	0.0131469	0.132876	0.0223788	0.0798023	0.132801
P35573	FALSE	Glycogen debranching enzyme OS=Homo sapiens OX=9606 GN=AGL PE=1 SV=3	AGL															30	13	1563	1457	132.8	116.9	3232.7	3040.9		3	2	101	95.9	78.3	82.9	5.9	7.2	129	184	59.5	64.7
P35579	FALSE	Myosin-9 OS=Homo sapiens OX=9606 GN=MYH9 PE=1 SV=4	MYH9		63	18	6721	7334.9	3043.7	3635.5	308.1	266.8	4571.9	6816	2839.8	2547		187	46	24942.5	23964.5	2057.2	1782.8	29819.8	27753.8		52	14	1492.6	1379.5	1702.9	1589.2	188.3	123.9	2282	2666	1117.7	1293.7		3.1291	3.2301	1.5477	1.64651	0.0764364	0.0720244	2.9039	2.8091	1.27603	1.18185
P35580	FALSE	Myosin-10 OS=Homo sapiens OX=9606 GN=MYH10 PE=1 SV=3	MYH10		38	11	788.2	866.2	327.9	399.3	38.2	35.4	526.9	713.5	296.1	287.5		151	37	12870.8	12290.4	1082	884.2	15281.1	14519.7		47	17	2174.1	1957.2	2364.7	2169	199.8	163.5	3250.4	3514.6	1634.1	1848.5		0.366963	0.381451	0.166734	0.180842	0.00947703	0.00955646	0.334667	0.294057	0.133049	0.133404
P35606	FALSE	Coatomer subunit beta' OS=Homo sapiens OX=9606 GN=COPB2 PE=1 SV=2	COPB2		24	11	2137.1	2568.6	2079.7	2622.1	177.3	162.4	2505.9	3684.3	1724.4	1785.2		61	18	6608.4	6116.9	538.8	470.6	8183.2	7839.1		25	10	1841.3	1697.8	1735.6	1657.8	131.1	101	3085.5	3694.9	1198.4	1375.8		0.994972	1.13114	1.05751	1.18755	0.0439863	0.0438409	1.59165	1.51842	0.774837	0.828361
P35610	TRUE	Sterol O-acyltransferase 1 OS=Homo sapiens OX=9606 GN=SOAT1 PE=1 SV=3	SOAT1		36	7	1200.7	1414.4	8826.6	10700.1	438.4	393.1	2581	3653.2	9193.7	9311.4		35	4	4433.2	3973.9	431.8	382.9	16474.2	14825.9		31	4	2847.5	2761.5	2285.7	2244.9	123	96.2	2512.1	2512.8	6180.8	7147.5		0.559011	0.622864	4.48825	4.84606	0.108763	0.10612	1.63935	1.50561	4.13107	4.32063
P35611	FALSE	Alpha-adducin OS=Homo sapiens OX=9606 GN=ADD1 PE=1 SV=2	ADD1		3	2	181.7	221.3	217.9	253.7	9.3	9.3	294.7	379.2	134.2	147.4		13	6	1017.2	890.1	78.4	67.4	1504.9	1444.3															0.0845943	0.0974546	0.1108	0.1149	0.00230723	0.0025106	0.187182	0.156281	0.0603011	0.0683959
P35613	TRUE	Basigin OS=Homo sapiens OX=9606 GN=BSG PE=1 SV=2	BSG		36	10	5304.8	5578.6	6882.9	8243.7	337.7	313.8	4448.5	5539.2	3757.2	3682.3		131	11	13329.1	11437.2	724.7	572.1	52502.5	44114.3		49	8	5160.4	4604.1	2697	2572.2	158.2	105	5155.6	5309.8	5328.5	5718.3		2.46976	2.45667	3.4999	3.73356	0.0837799	0.0847124	2.82552	2.28289	1.68825	1.70864
P35637	FALSE	RNA-binding protein FUS OS=Homo sapiens OX=9606 GN=FUS PE=1 SV=1	FUS		90	7	11827.9	15221.2	2655.8	3050.6	283.5	222.8	23921	31475.9	2308	2691.2		202	8	33898.5	30642.8	2276.5	1823.6	68888.7	63935.1		55	5	8396.5	7301.4	9482.2	9003.9	693.6	546.5	12317	14230.5	6155.6	6114.8		5.50673	6.70301	1.35045	1.38161	0.0703334	0.0601463	15.1937	12.9723	1.03707	1.24876
P35659	FALSE	Protein DEK OS=Homo sapiens OX=9606 GN=DEK PE=1 SV=1	DEK		14	7	809	899.7	1830	1998	126.8	116.7	905	901.1	1025.9	1016.3		16	7	882.3	759.3	87	68.2	841.9	769.8		28	10	1588.8	1128.6	862.1	1046.3	176.5	134.5	2050.7	2491.8	713.8	533.1		0.376647	0.396204	0.93054	0.904891	0.0314578	0.0315039	0.574822	0.371373	0.460975	0.471579
P35790	FALSE	Choline kinase alpha OS=Homo sapiens OX=9606 GN=CHKA PE=1 SV=3	CHKA															2	2	179.3	148.9	17.1	12.1	259.2	349.6
P35813	FALSE	Protein phosphatase 1A OS=Homo sapiens OX=9606 GN=PPM1A PE=1 SV=1	PPM1A															7	2	635.8	568.9	53.3	46.2	1646.2	1866
P35908	FALSE	Keratin, type II cytoskeletal 2 epidermal OS=Homo sapiens OX=9606 GN=KRT2 PE=1 SV=2	KRT2		12	8	363.8	307.4	383.4	424.3	259	362.2	2477.2	236.5	462.5	1748.5		33	7	2224.4	1181.7	1518.2	3752.3	1588.5	3288.9		73	15	477.3	679.3	3014.5	5961.5	4140.6	681.8	976.6	1905	1211.3	8087.4		0.169375	0.135371	0.194956	0.192165	0.0642552	0.0977783	1.57342	0.0974695	0.207818	0.811331
P35998	FALSE	26S proteasome regulatory subunit 7 OS=Homo sapiens OX=9606 GN=PSMC2 PE=1 SV=3	PSMC2		25	12	1216.7	1362.9	1911.9	2353.5	168.9	164.8	1868.6	2598.1	1523.3	1521.5		51	12	7786.3	6869.3	693	612.5	12920.9	11715.4		40	13	3238.7	2988.1	1695.9	1792.9	202.2	175.5	5641.6	6628.7	1585.2	1911		0.56646	0.600185	0.972185	1.0659	0.0419024	0.0444888	1.18686	1.07076	0.684475	0.706
P36404	FALSE	ADP-ribosylation factor-like protein 2 OS=Homo sapiens OX=9606 GN=ARL2 PE=1 SV=4	ARL2															7	4	683.3	572.1	66.4	71.2	1730.2	1440.8
P36405	FALSE	ADP-ribosylation factor-like protein 3 OS=Homo sapiens OX=9606 GN=ARL3 PE=1 SV=2	ARL3		7	3	300	318.2	1219.4	1381.1	66.9	56.6	339.4	518.5	642.3	548		8	4	621.9	588	62.7	58.7	1459	1077.3															0.139671	0.140127	0.620055	0.625498	0.0165972	0.0152795	0.215574	0.213691	0.288609	0.254281
P36507	FALSE	Dual specificity mitogen-activated protein kinase kinase 2 OS=Homo sapiens OX=9606 GN=MAP2K2 PE=1 SV=1	MAP2K2		12	2	118.9	128.2	245.5	280.2	13	11	155.8	194.5	175.4	180.9											7	2	101.1	86.6	59.9	54.2	4.4	4.2	175.6	210.8	45.8	55.8		0.0553564	0.0564559	0.124835	0.126902	0.00322517	0.00296952	0.0989583	0.0801599	0.0788137	0.0839404
P36542	FALSE	ATP synthase subunit gamma, mitochondrial OS=Homo sapiens OX=9606 GN=ATP5F1C PE=1 SV=1	ATP5C1		19	7	565.6	677.2	2202	2840.7	100.1	102.1	1196	1624.2	1593.9	1606		25	8	3113.4	2500	307.4	174.9	7565.2	6407.7															0.263327	0.298221	1.1197	1.28655	0.0248338	0.0275626	0.759654	0.669387	0.716199	0.745209
P36543	FALSE	V-type proton ATPase subunit E 1 OS=Homo sapiens OX=9606 GN=ATP6V1E1 PE=1 SV=1	ATP6V1E1															9	3	728	602.6	63.9	45.8	1602.4	1561
P36551	FALSE	Oxygen-dependent coproporphyrinogen-III oxidase, mitochondrial OS=Homo sapiens OX=9606 GN=CPOX PE=1 SV=3	CPOX		21	6	404.7	462.2	1501.8	1777.1	62.5	68.2	591.5	767.1	905.4	885.5		29	6	1541.3	1347.3	124.4	104	2875.1	2755.7		23	5	711.9	633.1	537.4	517.3	77.3	29.8	1049	1205.4	736.2	743.5		0.188417	0.203541	0.763653	0.804846	0.0155056	0.018411	0.375699	0.316147	0.40683	0.410886
P36578	FALSE	60S ribosomal protein L4 OS=Homo sapiens OX=9606 GN=RPL4 PE=1 SV=5	RPL4		101	20	13542.3	14924.1	11673.4	12521.2	797.1	699.8	4902.2	6151.5	9464.7	6656.3		98	17	17199.8	14352.5	1891.1	1656.5	21993.6	17322.8		78	18	9237.8	8537.5	6184.1	5983.6	509.5	449.2	11882.2	14637.9	3928	4651.9		6.3049	6.57218	5.93583	5.67083	0.197752	0.188916	3.11369	2.53524	4.25284	3.08863
P36639	FALSE	7,8-dihydro-8-oxoguanine triphosphatase OS=Homo sapiens OX=9606 GN=NUDT1 PE=1 SV=3	NUDT1		5	2	193.9	216.6	166.7	199.1	4.7	5.3	277.4	381.2	107.7	89.5		39	5	6338.9	6293.9	409.3	325.9	8358.1	6662.2		30	4	307.4	277.1	4826.6	5586.9	193.7	184.7	407.3	478.9	2295.2	2455		0.0902742	0.0953849	0.0847656	0.0901721	0.00116602	0.00143077	0.176194	0.157105	0.0483936	0.0415294
P36776	FALSE	Lon protease homolog, mitochondrial OS=Homo sapiens OX=9606 GN=LONP1 PE=1 SV=2	LONP1		11	7	469.9	525.7	486.5	574.5	34.3	29.4	621.3	975.2	413.3	410.4		19	9	1338.7	1226.1	139.4	109.1	2667.1	2341.7		33	12	2623.9	2361.4	1726.2	1667.5	147.8	99.2	4328.3	5214.3	1535.5	1649.4		0.218772	0.231504	0.247381	0.26019	0.00850948	0.00793672	0.394627	0.401912	0.185711	0.190432
P36957	FALSE	Dihydrolipoyllysine-residue succinyltransferase component of 2-oxoglutarate dehydrogenase complex, mitochondrial OS=Homo sapiens OX=9606 GN=DLST PE=1 SV=4	DLST															5	2	774.4	619.6	75.8	59.3	1320	1236.4		6	2	408.5	400.1	199.6	174.4	14.7	10	461.2	489.4	165.4	173.9
P37108	FALSE	Signal recognition particle 14 kDa protein OS=Homo sapiens OX=9606 GN=SRP14 PE=1 SV=2	SRP14		2	2	94.3	96.3	286	351.8	16.3	13.2	125.1	141	167.6	135.5		2	2	178.6	146.2	21.4	19.2	314	219.8		3	2	51.8	48.1	36.6	30.5		4.4	103.4	103.4	25.8	28.7		0.0439033	0.042408	0.145429	0.15933	0.00404386	0.00356343	0.0794588	0.0581108	0.0753089	0.0628741
P37198	FALSE	Nuclear pore glycoprotein p62 OS=Homo sapiens OX=9606 GN=NUP62 PE=1 SV=3	NUP62		4	2	63.1	76	107.9	103.4	18.8	18.3	58.3	51.5	63.2	66.9		4	2	1297.1	1269.8	90.3	70.9	2468.9	2447.5															0.0293775	0.0334684	0.0548663	0.0468297	0.00466409	0.0049402	0.03703	0.0212249	0.0283981	0.0310426
P37235	FALSE	Hippocalcin-like protein 1 OS=Homo sapiens OX=9606 GN=HPCAL1 PE=1 SV=3	HPCAL1															9	3	769.4	693	50.5	41.8	3949.7	3368.4
P37268	TRUE	Squalene synthase OS=Homo sapiens OX=9606 GN=FDFT1 PE=1 SV=1	FDFT1		36	10	815.1	909	3567.4	4722.2	136.4	168.4	1921.4	2793.8	2899.2	2913.9		60	12	4419.3	4158.3	305.3	225.2	13657.1	12739.4		7	3	112.6	97.8	108.6	96.7	7.1	3.4	229.2	227.5	342	427.9		0.379487	0.400299	1.81399	2.13868	0.0338394	0.0454607	1.2204	1.15142	1.30272	1.3521
P37802	FALSE	Transgelin-2 OS=Homo sapiens OX=9606 GN=TAGLN2 PE=1 SV=3	TAGLN2		54	15	4927.3	5041.2	4961	6354.4	294.4	293.4	4532.1	6123.8	5686	4521.2		47	11	7122.5	6640.2	554	510.9	11888.3	8556.4		57	12	5629.3	5083	3229	4229.5	230	246.3	7096.4	9453.4	2299	2693.6		2.29401	2.22001	2.52263	2.8779	0.0730376	0.0792052	2.87862	2.52382	2.55493	2.09791
P37837	FALSE	Transaldolase OS=Homo sapiens OX=9606 GN=TALDO1 PE=1 SV=2	TALDO1		10	5	417	469.1	653.1	919.4	63.1	55.1	331.5	467.8	647	641.9		14	7	1757.1	1306.9	153.2	120.4	2205.3	1950.4		30	9	3383.1	2955.9	1696.8	1821.2	151	126.9	3671.6	5028.5	1164.7	1449.6		0.194143	0.206579	0.332096	0.416395	0.0156545	0.0148746	0.210556	0.192796	0.290721	0.297852
P38117	FALSE	Electron transfer flavoprotein subunit beta OS=Homo sapiens OX=9606 GN=ETFB PE=1 SV=3	ETFB		10	6	933.8	1074.4	1226.8	1508.4	124.9	106.5	1639.9	2224.4	1073.3	1003.2		27	7	2230.9	1912.8	207.5	181.7	5729.9	4996.2		23	10	1430.1	1272.3	785.3	722.5	104	67.9	2703.5	2782.7	1121.6	1079.4		0.43475	0.473137	0.623818	0.683152	0.0309864	0.0287504	1.0416	0.916749	0.482274	0.4655
P38159	FALSE	RNA-binding motif protein, X chromosome OS=Homo sapiens OX=9606 GN=RBMX PE=1 SV=3	RBMX		81	6	8264.4	8813	2189.9	2727	198.8	184.3	13025.6	17504.2	2009.5	1943.6		142	7	17110.3	15843.7	1161.8	919.2	34573.5	27996.8		55	6	4049.5	3646.9	4904.3	4691.9	284.6	232.9	7744.3	8629.2	4067.9	4316.7		3.84767	3.88101	1.11355	1.23505	0.0493202	0.049753	8.27337	7.21406	0.902943	0.901861
P38435	TRUE	Vitamin K-dependent gamma-carboxylase OS=Homo sapiens OX=9606 GN=GGCX PE=1 SV=2	GGCX		6	3	215.3	236.7	480.7	540.2	21.2	19.8	372.2	509.4	389.6	411.9		8	5	275.8	268	26.1	22.4	770.8	771.1		4	2	244.9	223.7	135.3	111.8	6.8	4.6	281.9	270.8	314.9	374.5		0.100237	0.104236	0.244432	0.244656	0.0052595	0.00534514	0.236408	0.209941	0.175062	0.191128
P38571	FALSE	Lysosomal acid lipase/cholesteryl ester hydrolase OS=Homo sapiens OX=9606 GN=LIPA PE=1 SV=2	LIPA		24	4	5456.8	5714.5	413.2	471	34.2	23.8	2936.6	4470	618	547.8		26	5	6134.2	5672.2	357.5	270.8	11594.1	10015.1		12	4	316.3	282.2	1444.5	1399.4	60.6	61.5	541.7	612	1404.2	1487.1		2.54053	2.51651	0.210109	0.213315	0.00848467	0.00642497	1.86522	1.84224	0.27769	0.254188
P38606	FALSE	V-type proton ATPase catalytic subunit A OS=Homo sapiens OX=9606 GN=ATP6V1A PE=1 SV=2	ATP6V1A		18	8	1237.9	1626.1	1726.5	2080.2	146	116	1396	1996.2	1007.1	1179.7		38	14	5231.1	4765.8	444.6	359.5	10296.6	10416.2		18	8	1088.1	1238.2	1084.4	1010.5	89.6	71.4	1461.1	1676.5	827	1149.1		0.57633	0.716091	0.877911	0.94212	0.0362211	0.031315	0.886687	0.8227	0.452528	0.547399
P38646	FALSE	Stress-70 protein, mitochondrial OS=Homo sapiens OX=9606 GN=HSPA9 PE=1 SV=2	HSPA9		75	23	3461.8	3810	4502.3	5614.9	321	278.5	5250	7073.8	4136.3	3578.8		133	31	11506.8	10166.4	892.6	767.4	20751.5	17934.5		141	32	10854.2	9503.2	6361.4	6092.2	370.6	306.1	15373.6	17586.3	3830.5	4340.7		1.61171	1.67782	2.28938	2.54298	0.0796368	0.0751829	3.3346	2.91535	1.85859	1.66062
P38919	FALSE	Eukaryotic initiation factor 4A-III OS=Homo sapiens OX=9606 GN=EIF4A3 PE=1 SV=4	EIF4A3		48	12	1659.6	1737.5	1677.3	1991.2	135.4	112.2	1429.9	2061.2	1619.1	1409.8		81	12	4841.2	4323	403.9	345.4	6498.8	5450.1		74	12	2467.7	2287.1	1977.8	1934.5	177	142.7	4423.4	5303.9	1543.8	1790.4		0.772662	0.765149	0.852893	0.901812	0.0335913	0.0302891	0.908219	0.849489	0.727522	0.654169
P39019	FALSE	40S ribosomal protein S19 OS=Homo sapiens OX=9606 GN=RPS19 PE=1 SV=2	RPS19		11	6	1579.3	1837.6	1888.4	2480.9	230.8	185.6	1378.6	1770.3	1448.9	1511.4		35	6	9668.3	5724.9	1042.7	742.1	7977.6	7070		29	7	2741.4	2488.2	1475.9	1343.3	126.4	102.5	4032.4	4524.5	1152.3	1430.7		0.735276	0.80923	0.960236	1.1236	0.0572591	0.0501039	0.875635	0.729599	0.651045	0.701313
P39023	FALSE	60S ribosomal protein L3 OS=Homo sapiens OX=9606 GN=RPL3 PE=1 SV=2	RPL3		51	19	2870.7	3157.9	3353.1	4286.5	528.2	502.5	2844.2	3557.7	3318.8	2461.7		139	23	15808.2	13831.3	2187.4	1987	32505.6	26236.9		58	17	5043.5	4325.7	3204.1	3285	245.9	221.3	7292.8	8670.6	3755.4	3470.2		1.33651	1.39066	1.70502	1.94135	0.131041	0.135653	1.80653	1.46625	1.49126	1.14227
P39656	TRUE	Dolichyl-diphosphooligosaccharide--protein glycosyltransferase 48 kDa subunit OS=Homo sapiens OX=9606 GN=DDOST PE=1 SV=4	DDOST		12	4	135.2	168.1	413.8	535.6	4.2	17.2	205	300	272.3	330.8		27	8	1219.5	1028.4	89	62.7	2801.6	2643.4		26	7	745.8	729.6	559	470.5	26.1	22.1	1565.9	1683	709.3	863.9		0.0629452	0.0740268	0.210414	0.242572	0.00104198	0.00464325	0.130208	0.12364	0.122355	0.153496
P39687	FALSE	Acidic leucine-rich nuclear phosphoprotein 32 family member A OS=Homo sapiens OX=9606 GN=ANP32A PE=1 SV=1	ANP32A		29	5	3084.8	3212.8	1713.5	2030.6	138.1	132.3	2466.2	2868.1	1497.4	1424.4		61	5	13072.6	12370.7	1348.5	1115.6	12424.3	10598.8		42	5	2912.5	2465.2	2000.7	2284.6	187.1	183.1	5644.7	6164.9	1627.2	1711.5		1.43619	1.41483	0.871301	0.919656	0.0342612	0.0357152	1.56644	1.18204	0.672838	0.660944
P39748	FALSE	Flap endonuclease 1 OS=Homo sapiens OX=9606 GN=FEN1 PE=1 SV=1	FEN1		23	5	1480.4	1663.3	3593.2	4459.8	266	253.5	1773.5	2903.5	3189.5	3197		13	5	1995.4	1709.2	202.4	172.8	2375.1	2224.2		35	9	2551.4	2142.6	1260.2	1277	111	88	6258.2	6867.5	1167	1459.7		0.689231	0.732473	1.82711	2.01984	0.0659919	0.068434	1.12646	1.19663	1.43316	1.48346
P40222	FALSE	Alpha-taxilin OS=Homo sapiens OX=9606 GN=TXLNA PE=1 SV=3	TXLNA		7	5	179.2	179.6	177.5	238.9	5.4	9.2	169.3	255.9	136.6	119		11	7	1387.5	1284.2	100.9	83.6	1849.8	1642.1															0.0834303	0.0790911	0.0902573	0.108197	0.00133968	0.0024836	0.107533	0.105465	0.0613795	0.0552179
P40227	FALSE	T-complex protein 1 subunit zeta OS=Homo sapiens OX=9606 GN=CCT6A PE=1 SV=3	CCT6A		80	18	3979.2	4601.8	4021.6	5039.7	346.2	302.1	6915.8	9522	3312.1	3284.8		142	23	20439.5	18696.2	1648.2	1420.7	38263.3	33041.6		95	18	9285.6	8276	5345.3	5494.3	533.2	403.4	15328.3	19520.7	5042	6028.7		1.8526	2.02651	2.04495	2.28247	0.0858887	0.0815539	4.39266	3.92433	1.48825	1.5242
P40429	FALSE	60S ribosomal protein L13a OS=Homo sapiens OX=9606 GN=RPL13A PE=1 SV=2	RPL13A		13	4	1442.1	1574.7	1664.6	2152	257.8	261.9	1366.5	1722.5	1660.6	1317.8		28	7	4207.3	3574.4	774.3	716.7	6683.2	5073.9		16	5	1652.2	1461.7	772.5	614	115.9	93.6	1827.3	2198.6	712	788.4		0.6714	0.693456	0.846435	0.974638	0.0639575	0.0707016	0.86795	0.709899	0.746169	0.61148
P40616	FALSE	ADP-ribosylation factor-like protein 1 OS=Homo sapiens OX=9606 GN=ARL1 PE=1 SV=1	ARL1		18	5	511.5	601	2474.8	3255	76.1	127.6	1355.5	2049.9	1719.1	1573.3		14	5	1363	1238.7	76.8	67.3	5240	3968.8															0.23814	0.264664	1.25842	1.47418	0.0188796	0.0344465	0.860963	0.844832	0.772456	0.730036
P40763	FALSE	Signal transducer and activator of transcription 3 OS=Homo sapiens OX=9606 GN=STAT3 PE=1 SV=2	STAT3		6	3	152.5	191.9	182.1	279.5	12.6	24.3	172.3	254.5	114	120		4	3	65.2	70.3	3.8	2.9	99.5	76.1															0.0709996	0.0845077	0.0925964	0.126585	0.00312593	0.00655994	0.109439	0.104888	0.0512244	0.0556819
P40855	FALSE	Peroxisomal biogenesis factor 19 OS=Homo sapiens OX=9606 GN=PEX19 PE=1 SV=1	PEX19		25	8	1508.9	1665.1	2707.5	3422.8	116.7	117.9	4399.4	5756.1	2495.9	2362.2		80	12	6418.6	5718.4	385.1	292.6	29535.8	26021.6		20	9	1027.9	875.5	785.4	815.8	49.4	31.7	2591.7	3027	1267.1	1359.4		0.7025	0.733266	1.37674	1.55018	0.0289521	0.0318279	2.79433	2.37228	1.1215	1.0961
P40925	FALSE	Malate dehydrogenase, cytoplasmic OS=Homo sapiens OX=9606 GN=MDH1 PE=1 SV=4	MDH1		24	9	1827.3	1973.9	3636.4	4977.3	471.3	422.3	1611.2	2089.5	3660.8	3350.2		23	9	4440	3749.8	499.6	466.4	6001.9	4906.7		41	10	5136.2	4705.4	2649.4	2800	539.5	439.2	6880.4	9502.2	2028.4	2316.3		0.850738	0.869253	1.84908	2.25421	0.116925	0.114003	1.02337	0.861152	1.64493	1.55455
P40926	FALSE	Malate dehydrogenase, mitochondrial OS=Homo sapiens OX=9606 GN=MDH2 PE=1 SV=3	MDH2		79	17	2291.6	2487.7	9318	10915.4	771.6	794	1959.3	2893.4	7316.2	6500.7		81	15	8150.4	6839.3	1408.4	1328.6	12986.4	10651.9		135	18	13287.4	11572.6	5983.3	5902.9	935	754.4	28600.4	32296.4	5896.9	6110.4		1.0669	1.09552	4.73813	4.94357	0.191426	0.214345	1.24447	1.19247	3.28744	3.01643
P40937	FALSE	Replication factor C subunit 5 OS=Homo sapiens OX=9606 GN=RFC5 PE=1 SV=1	RFC5		8	3	219.1	235.7	258.9	326.9	9.3	13.9	219.4	313.4	250.8	223.6		24	4	1361.1	1238.5	107.5	95.8	2505	2185		8	4	195.6	180.9	155.1	170	13.4	13.2	465.6	569.6	226.3	260.7		0.102007	0.103796	0.131649	0.148053	0.00230723	0.0037524	0.139355	0.129163	0.112694	0.103754
P40938	FALSE	Replication factor C subunit 3 OS=Homo sapiens OX=9606 GN=RFC3 PE=1 SV=2	RFC3		12	8	724	886.2	857.6	1009.5	74.9	58.4	996.9	1407.6	564.8	599.1		20	9	1649.7	1539.3	133.7	119.8	2813	2458.7		9	6	275.1	230.8	324.7	324	26.3	25.3	551.3	661.8	221.3	269.5		0.337073	0.390259	0.436083	0.457201	0.0185819	0.0157655	0.633194	0.580119	0.253786	0.277992
P40939	FALSE	Trifunctional enzyme subunit alpha, mitochondrial OS=Homo sapiens OX=9606 GN=HADHA PE=1 SV=2	HADHA		179	35	12514.5	13384.4	15617.3	18508.2	716.5	718.1	11125.8	14885.3	36522.1	31225.5		244	37	18033.8	17071.3	1258.9	1128	65365.5	52152.1		136	29	10151.1	9343.7	10006.1	10916.6	599	500.1	15036.6	15409.8	7928.3	8721.2		5.82639	5.89413	7.94127	8.38234	0.177756	0.193856	7.06669	6.13473	16.4107	14.4891
P41091	FALSE	Eukaryotic translation initiation factor 2 subunit 3 OS=Homo sapiens OX=9606 GN=EIF2S3 PE=1 SV=3	EIF2S3		29	10	1005.5	1029	2282.6	2687	139.7	149	1467	1951.3	2001.7	1629.7		59	14	7455.4	6521.5	561.7	444.6	13828.5	12200.8		19	8	1853.5	1606.5	1202.1	1103.5	81.4	64.2	2052.6	2550.9	1116.2	1299.6		0.468132	0.453144	1.16068	1.21694	0.0346581	0.0402235	0.931784	0.804196	0.899438	0.756206
P41208	FALSE	Centrin-2 OS=Homo sapiens OX=9606 GN=CETN2 PE=1 SV=1	CETN2		5	3	159.6	181.5	147.6	184.3	10.5	12	263.3	332.6	112.4	124.6		10	5	1068.3	983.6	86	68.3	3492.2	3284.8		20	5	762.8	634.4	427.8	462.1	26.1	21.3	1368.4	1696.4	3393.5	4657.2		0.0743051	0.0799278	0.0750534	0.0834692	0.00260494	0.00323948	0.167238	0.137076	0.0505055	0.0578163
P41223	FALSE	Protein BUD31 homolog OS=Homo sapiens OX=9606 GN=BUD31 PE=1 SV=2	BUD31		8	3	189.9	244.2	408	493.8	94.5	88.3	229.5	336.4	278.1	301.6		7	2	2277.1	2067.9	547.2	497.3	3594.5	3316.9		5	2	742.9	608.6	406.3	413.7	124.9	91.4	1275.3	1565.8	394.3	408		0.0884119	0.107539	0.207465	0.223641	0.0234445	0.0238372	0.14577	0.138642	0.124961	0.139947
P41227	FALSE	N-alpha-acetyltransferase 10 OS=Homo sapiens OX=9606 GN=NAA10 PE=1 SV=1	NAA10		13	7	562.7	703.3	733.1	935.2	49.4	39.9	872.5	1133.3	332.3	369.1		35	10	2888.4	2405.2	195.7	165.6	3557.3	3389.2		14	6	1570.9	1525.8	1045.1	1010.1	64.4	49.6	1859.9	2265.4	821.1	1030.5		0.261977	0.309715	0.372775	0.423551	0.0122556	0.0107713	0.554179	0.467071	0.149315	0.171268
P41240	FALSE	Tyrosine-protein kinase CSK OS=Homo sapiens OX=9606 GN=CSK PE=1 SV=1	CSK		12	8	636.7	709	380.7	496.5	30.5	24.4	821.5	1177.9	334.3	326.9		24	9	3287.5	3054.5	222.2	191	4457	3780.6		10	5	22.9	17.3	21.6	20.8	3.8		36.8	46.2	16.7	20.2		0.296429	0.312225	0.193583	0.224864	0.00756674	0.00658694	0.521786	0.485452	0.150213	0.151687
P41247	FALSE	Patatin-like phospholipase domain-containing protein 4 OS=Homo sapiens OX=9606 GN=PNPLA4 PE=2 SV=3	PNPLA4		7	2	13.5	17.6	316.9	409.1	4.6	16.1	19.6	27.8	207	175.3																								0.00628521	0.00775057	0.161141	0.185281	0.00114121	0.0043463	0.0124492	0.0114573	0.0930128	0.0813419
P41250	FALSE	Glycine--tRNA ligase OS=Homo sapiens OX=9606 GN=GARS PE=1 SV=3	GARS		20	11	1150.5	1454.2	1391.6	1755.5	118.1	99.8	1209	1692.6	995	1034.6		34	12	2918.6	2690.9	256.7	215.8	3904.3	3691.4		26	11	1787.3	1621	1136.4	1185.6	88.7	69.8	2279.4	2947.6	756.6	850.4		0.535639	0.640391	0.707617	0.795063	0.0292994	0.0269417	0.767912	0.697577	0.447091	0.480071
P41252	FALSE	Isoleucine--tRNA ligase, cytoplasmic OS=Homo sapiens OX=9606 GN=IARS PE=1 SV=2	IARS		24	13	1622.3	1948	1761.2	2073.1	161	139.5	1792.3	2604.2	1449.8	1420.9		93	23	11279	10320	989	911.9	16505.9	14741.8		65	17	5587.8	5334.5	5005.9	5141.5	328.6	292.1	7844.1	9698.6	2935.7	3394.2		0.755296	0.857847	0.895556	0.938904	0.0399424	0.0376589	1.1384	1.07328	0.651449	0.65932
P41440	TRUE	Folate transporter 1 OS=Homo sapiens OX=9606 GN=SLC19A1 PE=1 SV=3	SLC19A1		5	2	107.2	134.8	225.1	322.8	4	6.2	128.2	174.1	151.9	190																								0.0499092	0.0593623	0.114462	0.146196	0.000992359	0.00167373	0.0814278	0.0717524	0.0682543	0.088163
P41567	FALSE	Eukaryotic translation initiation factor 1 OS=Homo sapiens OX=9606 GN=EIF1 PE=1 SV=1	EIF1		8	3	326.2	394.8	986.4	1182.2	49	42.7	546.8	693.4	660.2	700.7											5	3	388.3	308.8	205.3	206	21	8.5	783.6	838.9	160.6	184.1		0.151869	0.173859	0.501576	0.535417	0.0121564	0.0115271	0.347307	0.285773	0.296652	0.325136
P41732	TRUE	Tetraspanin-7 OS=Homo sapiens OX=9606 GN=TSPAN7 PE=1 SV=2	TSPAN7		3	2	84.4	92.9	106.3	134.5	3.2	3.3	114.5	136.7	95.7	105.6																								0.0392942	0.0409107	0.0540527	0.0609149	0.000793887	0.000890857	0.0727261	0.0563386	0.0430016	0.049
P42126	FALSE	Enoyl-CoA delta isomerase 1, mitochondrial OS=Homo sapiens OX=9606 GN=ECI1 PE=1 SV=1	ECI1		6	3	340.9	377.4	533.9	601.4	51.7	44.1	320.8	439.6	445.2	359.8		6	3	653.6	554.8	108.1	88	1123.7	975.1		23	6	961.3	862.2	697.3	622.3	84.2	54.3	1435.6	1647.4	474.6	484.2		0.158713	0.166197	0.271484	0.272373	0.0128262	0.0119051	0.20376	0.181174	0.200045	0.166953
P42166	FALSE	Lamina-associated polypeptide 2, isoform alpha OS=Homo sapiens OX=9606 GN=TMPO PE=1 SV=2	TMPO		36	6	442.4	504.2	634.1	747.3	46.8	44.8	630.6	898.4	418.4	370.8		100	7	1276.5	1182.8	85.9	79.5	1903.3	1728.1		44	5	427.1	389.3	864.5	888.2	36.1	45.2	820.2	955	452.3	563.3		0.205969	0.222036	0.322435	0.338451	0.0116106	0.0120941	0.400534	0.37026	0.188003	0.172057
P42167	TRUE	Lamina-associated polypeptide 2, isoforms beta/gamma OS=Homo sapiens OX=9606 GN=TMPO PE=1 SV=2	TMPO		81	5	2908.1	2951.2	6688.2	7981.6	268.8	285.6	9396.5	12695.7	5868.6	5007.8		225	5	11352.9	9897	907.7	704.6	65555.9	56264.1		85	10	4875.1	4503.5	2554	2474.5	124.1	92.5	7472.7	8229.2	8361.2	8788.7		1.35393	1.29963	3.40089	3.61486	0.0666865	0.0770996	5.96831	5.23232	2.63698	2.3237
P42224	FALSE	Signal transducer and activator of transcription 1-alpha/beta OS=Homo sapiens OX=9606 GN=STAT1 PE=1 SV=2	STAT1															3	3
P42285	FALSE	Exosome RNA helicase MTR4 OS=Homo sapiens OX=9606 GN=MTREX PE=1 SV=3	SKIV2L2		24	9	821.2	916.4	695.4	860.1	58.2	50.9	966.8	1283.2	637.4	589.1		32	12	3063.1	2962.4	295.3	271.1	2943.8	2533.8		25	9	727.9	636.8	525.5	474.3	47.5	40.5	1379.8	1646	397.5	456.8		0.382327	0.403558	0.353605	0.389538	0.0144388	0.0137408	0.614075	0.528849	0.286408	0.273352
P42575	FALSE	Caspase-2 OS=Homo sapiens OX=9606 GN=CASP2 PE=1 SV=2	CASP2															5	3	402.4	371.1	34.6	25.9	555.1	551.6
P42677	FALSE	40S ribosomal protein S27 OS=Homo sapiens OX=9606 GN=RPS27 PE=1 SV=3	RPS27		18	2	885	1354.9	2196.2	2901.7	198.3	170.9	2078.9	2637	1288.4	1615.3		45	2	3587.1	3147.8	437	383.9	7639	7596.6		21	2	1283.6	1097.3	794.5	766.8	124.7	90.6	1975.1	2325.4	1031.8	1074.7		0.41203	0.596662	1.11675	1.31418	0.0491962	0.0461356	1.32044	1.0868	0.578926	0.749524
P42704	FALSE	Leucine-rich PPR motif-containing protein, mitochondrial OS=Homo sapiens OX=9606 GN=LRPPRC PE=1 SV=3	LRPPRC		89	34	3227.6	3706.9	4297.7	5326	303.4	281	3541.8	5283	3713.4	3700.9		205	48	23333	22407.9	1795.6	1583.4	31695.1	27914.5		165	38	11109.2	9838.1	8258.2	7717	575.3	434.8	19428.9	21386.9	5420.3	5991.2		1.50268	1.63242	2.18535	2.41214	0.0752704	0.0758578	2.24962	2.1773	1.66857	1.71728
P42765	FALSE	3-ketoacyl-CoA thiolase, mitochondrial OS=Homo sapiens OX=9606 GN=ACAA2 PE=1 SV=2	ACAA2		3	2												12	6	2658.8	2392.1	175.3	172.6	1301.1	1302.7		12	6	512.8	501.3	1184.8	1183	77.5	62.6	1432	1400.5	805	914.1
P42766	FALSE	60S ribosomal protein L35 OS=Homo sapiens OX=9606 GN=RPL35 PE=1 SV=2	RPL35															10	4	278.8	238	44.9	43.4	257.8	196.3		6	2	181	147.6	100.9	82	5.1	5	225.9	258.4	68.5	83.3
P42771	FALSE	Cyclin-dependent kinase inhibitor 2A OS=Homo sapiens OX=9606 GN=CDKN2A PE=1 SV=2	CDKN2A															4	2	136.3	127.9	12	8.5	276.9	253.1		9	3	585.7	494.3	480.5	492.5	52.8	35.3	1086.9	1415.1	381.8	452
P42785	FALSE	Lysosomal Pro-X carboxypeptidase OS=Homo sapiens OX=9606 GN=PRCP PE=1 SV=1	PRCP		45	11	5195.1	5758.6	460.2	358.5	70.4	13	2690.2	4363.6	593.3	606.9		62	8	7906.8	8032.8	469.9	384.8	7534.2	6347.8		34	7	374.6	338.4	2534.6	2963.5	111.7	111.3	528.4	615.4	2134.2	2265.1		2.41869	2.53593	0.234008	0.162364	0.0174655	0.00350943	1.70871	1.79838	0.266592	0.281611
P42892	TRUE	Endothelin-converting enzyme 1 OS=Homo sapiens OX=9606 GN=ECE1 PE=1 SV=2	ECE1		25	12	2687.2	3039.3	568.5	662.3	26.9	36.7	2392	3267.2	604.9	613.1		37	13	5680.7	5239.9	363.4	294.9	7640.7	6768.4		8	5	262.1	276.3	850.3	723.5	30.3	22.1	385.3	420.5	1271.4	1359.8		1.25108	1.33843	0.289078	0.299955	0.00667361	0.0099074	1.51931	1.34652	0.271804	0.284488
P43003	TRUE	Excitatory amino acid transporter 1 OS=Homo sapiens OX=9606 GN=SLC1A3 PE=1 SV=1	SLC1A3		14	6	607.6	699.5	2338.7	3017.6	124	124	583.1	803.9	1717	1936.7		17	5	1284.8	1108	107.3	79.2	4080.6	3794.2		9	3	678.8	594.1	458.9	374.8	27.4	13.2	812	882.8	935.7	1097.6		0.282881	0.308041	1.18921	1.36667	0.0307631	0.0334746	0.370363	0.331314	0.771512	0.898659
P43034	FALSE	Platelet-activating factor acetylhydrolase IB subunit alpha OS=Homo sapiens OX=9606 GN=PAFAH1B1 PE=1 SV=2	PAFAH1B1		5	3												9	4	385.4	359.5	30.9	29.3	686	538.2		12	7	91	83.1	68.3	75	7.1	5	128.3	170.4	53.3	54.3
P43243	FALSE	Matrin-3 OS=Homo sapiens OX=9606 GN=MATR3 PE=1 SV=2	MATR3		90	23	4963.2	5466.4	3029.4	3891.1	248.5	223.2	6299.9	9001.5	2670.3	2641.4		167	27	16396.4	15458.9	1228.2	1060.7	24317.2	20950.7		68	18	3253.4	3037.1	4298.1	3856.9	281.1	229.4	7858.3	9339.8	3059.1	3468.7		2.31072	2.40726	1.54043	1.76227	0.0616503	0.0602543	4.00146	3.70982	1.19987	1.22565
P43246	FALSE	DNA mismatch repair protein Msh2 OS=Homo sapiens OX=9606 GN=MSH2 PE=1 SV=1	MSH2		33	9	1131.9	1386.5	869.8	1200.6	107.2	87.6	1164.1	1783.5	694.1	715.1		44	15	3097.4	2973	276.5	239.1	4289.1	3562		19	6	388.8	354.1	315.3	313.9	61.2	69.2	540.4	656.9	224.2	259.8		0.52698	0.610578	0.442286	0.54375	0.0265952	0.0236482	0.739393	0.73504	0.311885	0.331818
P43304	FALSE	Glycerol-3-phosphate dehydrogenase, mitochondrial OS=Homo sapiens OX=9606 GN=GPD2 PE=1 SV=3	GPD2		20	8	166.7	218.3	521.4	624.1	25	25.2	346.5	488.3	394.9	436.9		21	8	689.6	622.9	48.3	37.1	2156.2	1891.6		16	6	556.2	536.2	535.9	371.8	51.2	110.3	723.6	757.6	614.3	667.8		0.0776107	0.0961335	0.265128	0.282654	0.00620224	0.0068029	0.220084	0.201245	0.177443	0.202728
P43307	TRUE	Translocon-associated protein subunit alpha OS=Homo sapiens OX=9606 GN=SSR1 PE=1 SV=3	SSR1		26	4	1173.7	1310.1	2687.2	3211.3	79.9	104.8	3229.7	4475.6	2534.8	2350.3		64	4	5127.2	4613.1	269.2	199.2	36035.7	31931.9		31	4	1708.7	1766.7	1040	961.4	44	36.6	3211.6	2840.2	4024.5	4179.4		0.546441	0.576933	1.36642	1.45439	0.0198224	0.0282914	2.05138	1.84454	1.13898	1.09058
P43487	FALSE	Ran-specific GTPase-activating protein OS=Homo sapiens OX=9606 GN=RANBP1 PE=1 SV=1	RANBP1		30	10	2152.1	2227.1	2482.4	3301	173.9	163.8	1833	2387.1	2136.9	1787.8		36	9	4908.5	4738.4	422.7	353	6913.3	5457		50	9	4088.4	3345.3	2108.3	2364.1	146.1	126.3	5928.6	7847	1686.9	1906.1		1.00196	0.980756	1.26228	1.49502	0.0431428	0.0442189	1.16425	0.983803	0.960189	0.829567
P43490	FALSE	Nicotinamide phosphoribosyltransferase OS=Homo sapiens OX=9606 GN=NAMPT PE=1 SV=1	NAMPT		52	15	2007.4	2348.1	1840.3	2290.1	140.1	133.3	8323.9	11482	1341.8	1278.3		192	21	15168.4	13915.3	969.3	815.1	59768.4	49157.3		42	11	2649.7	2477.6	1815.1	1973.2	134.1	106.8	3863.7	4703.4	1470.3	1713.3		0.934587	1.03404	0.935777	1.03718	0.0347574	0.0359852	5.28703	4.73211	0.602921	0.593151
P43686	FALSE	26S proteasome regulatory subunit 6B OS=Homo sapiens OX=9606 GN=PSMC4 PE=1 SV=2	PSMC4		22	8	1329.8	1560.7	1004	1314.8	67.6	68.3	1417	1995.5	820.6	826.8		50	10	5855.1	5288.7	470.8	404.1	8473.1	7591.2		34	11	2942.9	2814.8	1687.5	1712	115.1	90	5333.9	6544.2	1485.1	1740.4		0.619116	0.687291	0.510526	0.595471	0.0167709	0.018438	0.900025	0.822412	0.368726	0.383648
P43897	FALSE	Elongation factor Ts, mitochondrial OS=Homo sapiens OX=9606 GN=TSFM PE=1 SV=2	TSFM		17	7	367	400.8	734.1	919.6	48.2	45.4	660.7	943.7	724.9	650.5		15	3	693.2	567.6	70.7	65.3	1331.4	1203.2		23	9	1092	913.9	596	563.6	47.3	33.9	2218.9	2576.4	478.4	556		0.170865	0.176502	0.373284	0.416486	0.0119579	0.012256	0.419652	0.38893	0.325725	0.301842
P45880	TRUE	Voltage-dependent anion-selective channel protein 2 OS=Homo sapiens OX=9606 GN=VDAC2 PE=1 SV=2	VDAC2		257	14	17052.1	17470.8	26191.5	32815.4	1073.3	1184.7	20606.1	28036.7	28418.3	21516.7		676	13	39625.1	35177.1	2604.1	2032.1	165596	135123		177	13	9697.3	8908.8	7989.7	7408.7	375.6	251.7	13105	13091.5	36879.8	40888.2		7.93896	7.69368	13.3182	14.862	0.266275	0.319818	13.0882	11.5549	12.7694	9.98408
P45954	FALSE	Short/branched chain specific acyl-CoA dehydrogenase, mitochondrial OS=Homo sapiens OX=9606 GN=ACADSB PE=1 SV=1	ACADSB															2	2	99.3	83.9	8.9	4.7	369	322		8	4	311.7	266.8	226.7	169.4	13	5	506.7	623.7	372.8	402.6
P45973	FALSE	Chromobox protein homolog 5 OS=Homo sapiens OX=9606 GN=CBX5 PE=1 SV=1	CBX5		6	2	786.4	854	960.5	1068.1	74.6	69.5	1132.6	1261.3	695.8	636.3		7	3	1402.5	1351.5	149.2	131.4	2130.5	1743.4		15	4	2804.8	2341.9	1991.9	2142.8	257.8	205.5	3690.8	3021.8	1535	1299.2		0.366125	0.376079	0.488406	0.483741	0.0185075	0.018762	0.719385	0.519824	0.312649	0.295253
P45974	FALSE	Ubiquitin carboxyl-terminal hydrolase 5 OS=Homo sapiens OX=9606 GN=USP5 PE=1 SV=2	USP5		20	10	943.8	1042.4	1187.4	1495.9	70.2	90.9	1351.6	1834.6	1010.3	945.9		18	7	2379.2	2242.2	188.9	172.2	3651.7	3308.8		17	6	920.9	855.4	764	862.5	89	69.7	1552.7	2086	533	647.2		0.439406	0.459045	0.603783	0.677491	0.0174159	0.024539	0.858486	0.7561	0.453965	0.438912
P45984	FALSE	Mitogen-activated protein kinase 9 OS=Homo sapiens OX=9606 GN=MAPK9 PE=1 SV=2	MAPK9		3	2	35.4	53.7	86.3	106	5		66.8	108.7	43.2	45.8		4	2								4	2												0.0164812	0.0236481	0.0438828	0.0480072	0.00124045		0.0424289	0.0447989	0.0194114	0.0212519
P46013	FALSE	Proliferation marker protein Ki-67 OS=Homo sapiens OX=9606 GN=MKI67 PE=1 SV=2	MKI67		3	2												4	4	206.8	210.3	16.8	14.5	314.3	261.5
P46060	FALSE	Ran GTPase-activating protein 1 OS=Homo sapiens OX=9606 GN=RANGAP1 PE=1 SV=1	RANGAP1		32	13	1416.8	1618.2	2018.5	2651	151.7	142.1	1322	1805.4	1691.6	1721		34	14	5560.7	5138.8	500.7	420.5	5459.2	4914.4		37	13	3572.1	3306.4	2277	2232.3	190.6	149.7	6664.6	8569.4	2084.6	2393.7		0.659621	0.712612	1.02639	1.20063	0.0376352	0.0383608	0.839685	0.744065	0.760099	0.798571
P46063	FALSE	ATP-dependent DNA helicase Q1 OS=Homo sapiens OX=9606 GN=RECQL PE=1 SV=3	RECQL		7	3	263.9	330.1	576.5	693.4	34.5	40.9	215.6	287.8	367.3	416.2		7	3	1009.8	885.7	87.2	80	994.2	950.6		5	3	233.4	206.3	255.1	227.8	11.2	8.1	476.4	556.3	99.1	132.6		0.122864	0.145367	0.293146	0.31404	0.00855909	0.0110412	0.136941	0.118612	0.165042	0.193123
P46087	FALSE	Probable 28S rRNA (cytosine(4447)-C(5))-methyltransferase OS=Homo sapiens OX=9606 GN=NOP2 PE=1 SV=2	NOP2															14	7	1214.1	1066.9	110.3	99.6	1012.2	999.7
P46087-2	FALSE	Isoform 2 of Probable 28S rRNA (cytosine(4447)-C(5))-methyltransferase OS=Homo sapiens OX=9606 GN=NOP2	NOP2																								12	7	1111	1007.1	976.9	850	89.5	87.8	1513.7	1519.6	583.7	618.2
P46108	FALSE	Adapter molecule crk OS=Homo sapiens OX=9606 GN=CRK PE=1 SV=2	CRK															24	9	2095.3	1993.3	139.1	103.9	4250.9	3653.4
P46109	FALSE	Crk-like protein OS=Homo sapiens OX=9606 GN=CRKL PE=1 SV=1	CRKL		14	5	729.2	894.3	1950.2	2616	25.2	64.7	1107.8	1451.3	446	461.9		26	8	2902.7	2747.2	154.9	138.4	5308	4153.2															0.339494	0.393826	0.991661	1.18478	0.00625186	0.0174662	0.703633	0.598129	0.200404	0.214329
P46379	FALSE	Large proline-rich protein BAG6 OS=Homo sapiens OX=9606 GN=BAG6 PE=1 SV=2	BAG6		93	24	1766.4	1887.8	8076.2	9444.6	382.5	354	1973.2	2628.7	7044.7	7138.2		55	15	3749.2	3530.4	304.1	240.7	5945.4	5863.3		13	7	262.3	239.3	221.8	205.4	9.7		342.7	398.2	350.2	451.2		0.822385	0.831337	4.10668	4.27745	0.0948943	0.0955646	1.2533	1.08337	3.16545	3.31224
P46459	FALSE	Vesicle-fusing ATPase OS=Homo sapiens OX=9606 GN=NSF PE=1 SV=3	NSF		3	2	103.1	100.7	117.7	132.7	10.7	9.9	96.4	140.7	93	91.9		5	3								9	7	372.4	313.2	254.7	254.2	24.7	11.7	671.5	790.7	231.5	254.7		0.0480004	0.0443456	0.0598495	0.0600996	0.00265456	0.00267257	0.0612297	0.0579871	0.0417884	0.042643
P46734	FALSE	Dual specificity mitogen-activated protein kinase kinase 3 OS=Homo sapiens OX=9606 GN=MAP2K3 PE=1 SV=2	MAP2K3		7	2												6	2	252.4	252.3	17.3	23	426	342.6
P46776	FALSE	60S ribosomal protein L27a OS=Homo sapiens OX=9606 GN=RPL27A PE=1 SV=2	RPL27A		8	2	141.3	120.7	204.8	257.1	18	18.4	149.6	167.5	227.2	130.5		14	3	2859	2485.3	326.9	300.2	5325.8	4322.2		5	2	43.6	45	32.3	28.8	3.2	3.5	87.2	121	36.2	34.9		0.0657852	0.0531531	0.104139	0.11644	0.00446561	0.0049672	0.0950203	0.0690323	0.102089	0.060554
P46777	FALSE	60S ribosomal protein L5 OS=Homo sapiens OX=9606 GN=RPL5 PE=1 SV=3	RPL5		40	11	1819.1	2256.1	2119.2	2643.2	205.4	193.1	2060.3	2573.6	1583.2	1638.3		91	14	7985	6503	939.3	829.5	13111	11396		54	11	2809.5	2463.6	1308.9	1192.9	173.9	138.8	4440.6	5102.4	1259.4	1314		0.84692	0.993527	1.0776	1.1971	0.0509576	0.0521286	1.30863	1.06067	0.711391	0.760197
P46778	FALSE	60S ribosomal protein L21 OS=Homo sapiens OX=9606 GN=RPL21 PE=1 SV=2	RPL21		15	5	592.3	656.6	698.9	903.7	105.3	103.8	532.2	696.8	571.5	509.9		28	7	4061.3	3226.6	666	560.2	6106.5	5203.8		26	8	1574.4	1503.5	934.8	810.8	137.9	104.4	2901.4	3235.3	971	1024.1		0.275758	0.289149	0.355385	0.409284	0.0261238	0.0280215	0.338034	0.287174	0.256796	0.236602
P46779	FALSE	60S ribosomal protein L28 OS=Homo sapiens OX=9606 GN=RPL28 PE=1 SV=3	RPL28		8	5	748.8	826.5	1062.6	1414	208.1	171.1	905	1089.9	1054.3	863.7		29	6	4079.9	3409.7	790.8	686.2	8729.2	6755.3		15	4	1747	1836.2	1221.1	1004.5	232.7	207.5	2465.1	2967.1	1400.3	1474.2		0.34862	0.363969	0.540323	0.640399	0.0516275	0.0461896	0.574822	0.449184	0.473736	0.40077
P46781	FALSE	40S ribosomal protein S9 OS=Homo sapiens OX=9606 GN=RPS9 PE=1 SV=3	RPS9		20	8	1577.7	1442.8	1389	2125.3	135.1	147.2	1218.3	1598	1319.4	903.7		42	10	8344.8	7260.9	1061	910	11526.2	9159.9		34	9	3250.6	2831.3	2245.8	2158.4	225.2	209.2	5096.3	6199.3	1771.6	2079.6		0.734531	0.635371	0.706295	0.962545	0.0335169	0.0397376	0.773819	0.658589	0.592856	0.419331
P46782	FALSE	40S ribosomal protein S5 OS=Homo sapiens OX=9606 GN=RPS5 PE=1 SV=4	RPS5		19	5	1311.5	1368.9	2252.7	2811.3	144.5	128.3	1234.6	1556	1757.7	1410		25	6	5032.8	4381.8	397	341.1	6333.3	5148		26	7	2345.6	1960.6	1244.8	1423.4	91.3	95.9	4496.3	5015.3	1028.9	1347.2		0.610596	0.602827	1.14548	1.27323	0.035849	0.0346354	0.784172	0.641279	0.7898	0.654262
P46783	FALSE	40S ribosomal protein S10 OS=Homo sapiens OX=9606 GN=RPS10 PE=1 SV=1	RPS10		62	11	8665.9	8880.2	2884.4	3788.9	215.2	199	7758.7	9828.6	2401.5	2241.5		123	9	18471.3	16102.4	1402.5	1056.2	20077.3	17110.5		35	8	1890.3	1634.3	1453	1482.2	102.1	85.9	3630	4365.8	1381.8	1755		4.03459	3.9106	1.46669	1.71599	0.0533889	0.0537214	4.92804	4.05069	1.07908	1.04009
P46821	FALSE	Microtubule-associated protein 1B OS=Homo sapiens OX=9606 GN=MAP1B PE=1 SV=2	MAP1B															6	3	480.4	415.2	53.3	49.5	584.2	551		3	2	291.6	272.8	200	172.5	16.1	12.6	528.9	614.9	142.3	158.7
P46926	FALSE	Glucosamine-6-phosphate isomerase 1 OS=Homo sapiens OX=9606 GN=GNPDA1 PE=1 SV=1	GNPDA1															8	3	342.6	292.4	44.2	35.8	492.7	488.7		4	2	28.6	26.3	19.5	24.6	3.6		43	46.7	16.6	20.3
P46940	FALSE	Ras GTPase-activating-like protein IQGAP1 OS=Homo sapiens OX=9606 GN=IQGAP1 PE=1 SV=1	IQGAP1		8	6	428.4	496.2	301.4	371.6	24.1	16.8	609	845.1	269.9	285.4		18	9	1684.7	1557.1	121.3	97.1	2491.1	2166.5		11	7	572	560.5	673.4	663.3	49.2	38.2	905.6	1105.5	427.1	519.4		0.199451	0.218513	0.153259	0.168297	0.00597896	0.00453527	0.386814	0.348294	0.121276	0.13243
P46977	TRUE	Dolichyl-diphosphooligosaccharide--protein glycosyltransferase subunit STT3A OS=Homo sapiens OX=9606 GN=STT3A PE=1 SV=2	STT3A		65	14	2905.5	2917.1	7117.3	8797.9	249.5	286.9	7089.7	9635.3	6940.3	5594.6		71	12	4769.4	4426.1	298.6	234.2	20668.5	17340.5		25	8	1031.1	974.1	729.1	748.2	47	25.5	1529.5	1574.8	2138.5	2520.4		1.35272	1.28461	3.61909	3.98456	0.0618984	0.0774505	4.50311	3.97103	3.11854	2.59598
P47755	FALSE	F-actin-capping protein subunit alpha-2 OS=Homo sapiens OX=9606 GN=CAPZA2 PE=1 SV=3	CAPZA2															14	3	135.4	127.2	10.1	7.7	216.1	181.3
P47756-2	FALSE	Isoform 2 of F-actin-capping protein subunit beta OS=Homo sapiens OX=9606 GN=CAPZB	CAPZB		34	11	2168.9	2439.5	2956.5	3716.7	175.3	164.9	5439	7037.6	1886.7	1740		22	8	2147	1896	157.3	137.3	3138.1	2785.8		31	10	2259.6	2057	2715.4	2706.7	152.8	117.2	3023.3	3682.9	1584.3	1857.9		1.00978	1.07429	1.50336	1.68329	0.0434901	0.0445158	3.45465	2.90043	0.847765	0.807387
P47813	FALSE	Eukaryotic translation initiation factor 1A, X-chromosomal OS=Homo sapiens OX=9606 GN=EIF1AX PE=1 SV=2	EIF1AX; LOC101060318; LOC107984923		11	5	589.5	670.7	624.6	834.8	36.4	46.8	745.9	953.5	499.7	503.1		21	7	1431	1123.3	111.7	89.9	2161.9	1819.5		21	6	1321.6	1158.2	639.7	699.2	66.6	46.9	2583.3	3322.4	659.2	727.9		0.274454	0.295358	0.317604	0.37808	0.00903047	0.012634	0.473768	0.392969	0.224534	0.233446
P47897	FALSE	Glutamine--tRNA ligase OS=Homo sapiens OX=9606 GN=QARS PE=1 SV=1	QARS		15	9	643.6	683.2	763.7	958.9	43.9	39	684.6	915.9	636.8	581.6		12	10	539.1	487.9	51.2	39	628.1	518.5		11	7	1120.5	1072.8	753.2	755.2	51.3	32.7	1243.7	1578.6	471.9	559.8		0.299642	0.300863	0.388335	0.434284	0.0108911	0.0105283	0.434832	0.377473	0.286138	0.269871
P47914	FALSE	60S ribosomal protein L29 OS=Homo sapiens OX=9606 GN=RPL29 PE=1 SV=2	RPL29		11	3	417.5	452.6	444.7	608.2	44.9	41	457.5	527	317.7	276.5		30	5	2671.2	2212.6	353	300.7	3573	3106.2		19	4	1459.8	1326.4	868.5	780.5	74.1	70.2	1595.9	1801.8	646.6	694.8		0.194376	0.199313	0.226126	0.275453	0.0111392	0.0110682	0.290587	0.217194	0.142754	0.1283
P47985	TRUE	Cytochrome b-c1 complex subunit Rieske, mitochondrial OS=Homo sapiens OX=9606 GN=UQCRFS1 PE=1 SV=2	UQCRFS1		40	8	1601.7	2003.6	2512.1	3110.6	191.1	197.6	4605.7	6430.8	1725.4	1553.9		23	8	1626.4	1376.7	179.6	148.3	4098.5	3431.2		28	5	992.5	876.6	653.8	650.4	76.7	61.6	1638.9	1858.8	849.8	881		0.745705	0.882332	1.27738	1.40879	0.0474099	0.0533434	2.92537	2.65035	0.775286	0.721034
P48047	FALSE	ATP synthase subunit O, mitochondrial OS=Homo sapiens OX=9606 GN=ATP5PO PE=1 SV=1	ATP5O		6	2	137.4	191.4	417.3	539.8	20.8	15.9	197.1	243.5	314.7	361.5											14	3	863.9	800.5	239.2	175.4	14.9	4.9	1299.1	1539.4	187.1	226.9		0.0639695	0.0842875	0.212194	0.244475	0.00516027	0.00429231	0.125191	0.100354	0.141406	0.167742
P48147	FALSE	Prolyl endopeptidase OS=Homo sapiens OX=9606 GN=PREP PE=1 SV=2	PREP		31	12	1707.5	2028.9	2233.5	2715.7	143	127.6	2730.7	4010.8	1727	1689.2		119	25	16206	15396.8	1045.3	844.5	20953	18656.9		23	9	1118.9	1022.6	879.3	981.1	82.8	65.2	1467.8	1829	722.6	834.3		0.794963	0.893474	1.13572	1.22994	0.0354768	0.0344465	1.73444	1.65298	0.776005	0.783815
P48444	FALSE	Coatomer subunit delta OS=Homo sapiens OX=9606 GN=ARCN1 PE=1 SV=1	ARCN1		22	10	483.7	604.2	824.4	979.4	76	59.9	686.5	851.2	650	657.9		19	9	2051.8	1746.1	203.2	163.3	2306.1	2298.6		18	9	330.9	303.1	229.6	228.1	23	13.2	674.8	763.8	170.3	195.3		0.225197	0.266074	0.419201	0.443569	0.0188548	0.0161704	0.436039	0.350808	0.292069	0.305276
P48449	FALSE	Lanosterol synthase OS=Homo sapiens OX=9606 GN=LSS PE=1 SV=1	LSS		22	12	811.3	830.7	1907.1	2346.6	87.4	72.8	1033	1391.2	1801.4	1460.1		13	5	713.5	724.4	54.9	44	1352.9	1304.7		13	4	238.9	210.4	310	318.6	15.1	9.6	268.2	286.7	239.6	287.9		0.377718	0.365818	0.969745	1.06277	0.021683	0.0196528	0.656123	0.57336	0.809436	0.677509
P48507	FALSE	Glutamate--cysteine ligase regulatory subunit OS=Homo sapiens OX=9606 GN=GCLM PE=1 SV=1	GCLM		3	2	40.3	42.7	89.1	127.4	7.6	4.9	53.6	71.9	35.7	40.4		3	2																					0.0187625	0.0188039	0.0453066	0.0576993	0.00188548	0.00132279	0.0340447	0.0296324	0.0160413	0.0187462
P48509	TRUE	CD151 antigen OS=Homo sapiens OX=9606 GN=CD151 PE=1 SV=3	CD151		2	2	60.5	41.6	137.3	159.7	4	4	58.8	81.6	127	75.2																								0.028167	0.0183195	0.0698159	0.0723279	0.000992359	0.00107983	0.0373476	0.0336301	0.0570658	0.034894
P48556	FALSE	26S proteasome non-ATPase regulatory subunit 8 OS=Homo sapiens OX=9606 GN=PSMD8 PE=1 SV=2	PSMD8		18	8	1124	1293	3412	3631.5	147.1	130.2	2027.7	2604.5	1786.8	1587.2		20	4	2794.7	2643.1	237.8	225	5400	4390.5		16	6	1771.8	1619	651.1	727.2	52.9	44.7	2940.5	3642.7	633.9	746.6		0.523302	0.569403	1.73497	1.6447	0.036494	0.0351483	1.28792	1.0734	0.802876	0.736486
P48634	FALSE	Protein PRRC2A OS=Homo sapiens OX=9606 GN=PRRC2A PE=1 SV=3	PRRC2A															8	3	485.5	449.4	40.6	30.9	584.1	546.8
P48643	FALSE	T-complex protein 1 subunit epsilon OS=Homo sapiens OX=9606 GN=CCT5 PE=1 SV=1	CCT5		165	29	15125.8	16574.7	9742.5	12352.8	748	702.1	15543	22192.8	8279.4	7542.5		223	31	34711	32384.3	2732.2	2343.2	58822.8	49836.2		135	27	11789.2	11196.4	10851.9	11440.9	838.6	711.7	16132.1	20139.7	9228.2	10926.8		7.04213	7.29906	4.95398	5.59457	0.185571	0.189536	9.87233	9.14639	3.72024	3.49984
P48651	TRUE	Phosphatidylserine synthase 1 OS=Homo sapiens OX=9606 GN=PTDSS1 PE=1 SV=1	PTDSS1		19	6	419	484.3	1453	1751.5	79.4	63	1094.9	1456.2	1216.9	1106.8		22	4	490.5	434.9	51	44.8	1695.9	1479.1		6	3	121.4	105.6	114.3	108.9	6.6	6.8	131.6	109.8	360.5	397.4		0.195074	0.213273	0.738839	0.793252	0.0196983	0.0170073	0.69544	0.600148	0.546798	0.513572
P48723	FALSE	Heat shock 70 kDa protein 13 OS=Homo sapiens OX=9606 GN=HSPA13 PE=1 SV=1	HSPA13															10	3	1149.9	1060.9	71.7	70.1	2990.4	2537.6
P48729	FALSE	Casein kinase I isoform alpha OS=Homo sapiens OX=9606 GN=CSNK1A1 PE=1 SV=2	CSNK1A1		6	3	346.1	402.9	221.7	264.6	14	15	422.9	508.1	192.4	169											4	3	162.2	136.6	172.4	164.3	9.7	9.9	338.4	401.3	129.9	142.8		0.161134	0.177426	0.112733	0.119837	0.00347326	0.00404935	0.26861	0.209405	0.0864525	0.0784186
P48735	FALSE	Isocitrate dehydrogenase [NADP], mitochondrial OS=Homo sapiens OX=9606 GN=IDH2 PE=1 SV=2	IDH2		42	13	2773.7	3184.5	1257.5	1480.2	361.6	388.9	3899.9	5731.5	1136.3	1084		16	6	2031.7	1930.8	162.1	153.9	2369	2091.3		9	4	1253.3	1016.4	799.2	739.7	62.6	49.2	2490.8	2809.7	509.9	520.5		1.29135	1.40237	0.639428	0.67038	0.0897092	0.104986	2.47707	2.36214	0.510582	0.502993
P48739	FALSE	Phosphatidylinositol transfer protein beta isoform OS=Homo sapiens OX=9606 GN=PITPNB PE=1 SV=2	PITPNB		42	13	1746.6	1935.4	3950.3	5021.8	765.8	210	3577.3	4614	4594.8	3812.4		71	13	6156.6	5416.3	564	401.5	24887	19191.6		44	7	3277.2	2978.3	1909.9	2052.3	228.4	136.2	7006.7	8803.8	2531.2	2734.2		0.813166	0.852299	2.0087	2.27437	0.189987	0.0566909	2.27217	1.90158	2.06461	1.76901
P49005	FALSE	DNA polymerase delta subunit 2 OS=Homo sapiens OX=9606 GN=POLD2 PE=1 SV=1	POLD2		2	2
P49006	FALSE	MARCKS-related protein OS=Homo sapiens OX=9606 GN=MARCKSL1 PE=1 SV=2	MARCKSL1		24	7	304	421.8	1441.8	1821.7	60.2	60.8	318.2	439.4	815.5	969.3		23	5	812.2	570.4	67.9	38.4	1502.7	1509.1		21	6	1296.9	1086	562.2	455.1	20.4	20.7	1377.3	1469.3	590.8	725.4		0.141534	0.18575	0.733143	0.825045	0.014935	0.0164134	0.202109	0.181091	0.366435	0.44977
P49023	FALSE	Paxillin OS=Homo sapiens OX=9606 GN=PXN PE=1 SV=3	PXN															2	2	119.7	113.8	13	11.1	128.4	128.3
P49069	TRUE	Calcium signal-modulating cyclophilin ligand OS=Homo sapiens OX=9606 GN=CAMLG PE=1 SV=1	CAMLG		8	5	128.5	145.6	515.3	650.8	20.8	25.4	303.4	384	490.7	436.2		9	3	305.8	265.8	18.3	14.8	1519.8	1363.8															0.0598259	0.0641184	0.262026	0.294746	0.00516027	0.0068569	0.192708	0.158259	0.22049	0.202404
P49137	FALSE	MAP kinase-activated protein kinase 2 OS=Homo sapiens OX=9606 GN=MAPKAPK2 PE=1 SV=1	MAPKAPK2		4	3	329.9	424.2	398.9	534.5	19.5	24	767.4	1016.6	244	250.9		7	4	635.8	580.7	52.1	33.9	1418.9	1244.5															0.153592	0.186806	0.202837	0.242074	0.00483775	0.00647896	0.487424	0.418975	0.109638	0.116422
P49189	FALSE	4-trimethylaminobutyraldehyde dehydrogenase OS=Homo sapiens OX=9606 GN=ALDH9A1 PE=1 SV=3	ALDH9A1		36	13	736.8	759.3	1291.5	1510.5	85.2	66.1	2527.7	3570.3	1825.1	1560.8		38	13	2362.7	2126.5	220	193.8	6834.1	6384.9		16	5	928.9	841.4	602.1	609.4	84.8	61.9	1600.7	1917.5	706.6	814		0.343033	0.334376	0.656717	0.684103	0.0211372	0.0178441	1.6055	1.47144	0.820085	0.724236
P49207	FALSE	60S ribosomal protein L34 OS=Homo sapiens OX=9606 GN=RPL34 PE=1 SV=3	RPL34		18	6	1604.4	1960.7	3581.3	4785.8	516.4	452.5	2254.2	2393.4	2767.9	2592.6		59	6	12715.5	10262.2	2352.3	1995.5	20929.6	17373.1		19	5	3073.5	3203.7	2160.3	1485.3	356.2	284.7	4489.7	5456.4	2048	1953.9		0.746962	0.86344	1.82106	2.16748	0.128114	0.122155	1.43178	0.9864	1.24372	1.20301
P49257	TRUE	Protein ERGIC-53 OS=Homo sapiens OX=9606 GN=LMAN1 PE=1 SV=2	LMAN1		20	6	311	411.9	769.9	944.9	53.2	53	593.5	805.4	445.9	487.2		62	13	3056.9	2683.6	180.7	171.8	10114.4	9106		14	3	432.7	441.6	350.8	275.6	20.1	5.7	519.2	424.2	341.1	407.4		0.144793	0.18139	0.391488	0.427944	0.0131984	0.0143077	0.376969	0.331932	0.200359	0.226068
P49281-3	TRUE	Isoform 3 of Natural resistance-associated macrophage protein 2 OS=Homo sapiens OX=9606 GN=SLC11A2	SLC11A2															3	2	395.6	411.1	265.3	193.7	639.5	597.1
P49321	FALSE	Nuclear autoantigenic sperm protein OS=Homo sapiens OX=9606 GN=NASP PE=1 SV=2	NASP		99	26	6057.4	6638.2	3401.4	4344.1	596.7	498.1	10167.8	14483	2869.5	2680.7		302	42	24433.8	22102.2	1559.4	1269.3	72754.9	60742.5		107	26	6515.6	5519.2	4056.4	4157.9	234	188.6	7564.5	10069.1	7175.6	8966.1		2.82015	2.92329	1.72958	1.96744	0.148035	0.134465	6.45821	5.96893	1.28937	1.24389
P49327	FALSE	Fatty acid synthase OS=Homo sapiens OX=9606 GN=FASN PE=1 SV=3	FASN		223	66	19832.3	23118	13363.7	16727.3	1046.7	956.6	27415	41058.7	10586.7	10532.9		431	78	46620.5	45517.5	3659.6	3165.4	99807.2	94350.8		107	34	7059	6822.1	8933.9	9046.9	800	573.5	11872.4	14401.3	7573.4	9860.1		9.23334	10.1806	6.79533	7.57577	0.259675	0.25824	17.413	16.9217	4.757	4.88743
P49356	FALSE	Protein farnesyltransferase subunit beta OS=Homo sapiens OX=9606 GN=FNTB PE=1 SV=1	FNTB; CHURC1-FNTB		3	2	57.2	50.3	63.5	62.7	5.4	4	116.4	180.6	103.4	71.6		13	2	609.5	556.8	36.1	32.2	2596.9	2007.2															0.0266307	0.0221508	0.0322892	0.0283967	0.00133968	0.00107983	0.0739329	0.0744313	0.0464615	0.0332235
P49366	FALSE	Deoxyhypusine synthase OS=Homo sapiens OX=9606 GN=DHPS PE=1 SV=1	DHPS															18	4	302	270.6	18.3	14.4	965.3	885.5
P49368	FALSE	T-complex protein 1 subunit gamma OS=Homo sapiens OX=9606 GN=CCT3 PE=1 SV=4	CCT3		153	32	18386.2	22217.1	14408	17882.5	1003.9	962.2	12891.7	18328.3	13797.7	12925.2		203	32	29047.2	26787.6	2274.5	2066.6	63574	58798.5		172	29	16729.7	15170.8	13143.2	13205.6	1022.5	816.9	24524.7	29264.7	11404.8	13609.8		8.56008	9.78382	7.32635	8.09896	0.249057	0.259752	8.18833	7.5537	6.19982	5.99749
P49406	FALSE	39S ribosomal protein L19, mitochondrial OS=Homo sapiens OX=9606 GN=MRPL19 PE=1 SV=2	MRPL19																								4	2	95.7	82.2	65.6	59.6	3	4.7	148.5	140.4	46.5	55.5
P49411	FALSE	Elongation factor Tu, mitochondrial OS=Homo sapiens OX=9606 GN=TUFM PE=1 SV=2	TUFM		53	14	4984.9	5647.5	5140.4	6064.5	397.5	374.1	4623.7	6277.5	4436.1	4077.7		91	20	11926.4	10723.5	992.6	902.3	20923.5	18115.4		133	24	11150.3	9807.6	6448.8	6269.9	588.2	421.1	20080.5	22110.4	6123.2	6899.6		2.32082	2.48701	2.61385	2.7466	0.0986157	0.100991	2.9368	2.58717	1.9933	1.89212
P49419	FALSE	Alpha-aminoadipic semialdehyde dehydrogenase OS=Homo sapiens OX=9606 GN=ALDH7A1 PE=1 SV=5	ALDH7A1		10	2	137.4	155.9	123.9	146.8	8.8	8.7	277.3	341.8	114.8	93.4		12	7	902.1	798.1	86.9	75.7	1517.7	1407.3		23	8	1020.4	915.3	820.4	861.8	60.8	41.2	1244.2	1584.6	543.1	669.4		0.0639695	0.0686542	0.0630021	0.0664855	0.00218319	0.00234862	0.176131	0.140867	0.0515839	0.0433391
P49427	FALSE	Ubiquitin-conjugating enzyme E2 R1 OS=Homo sapiens OX=9606 GN=CDC34 PE=1 SV=2	CDC34															4	2	598.6	525.6	42.4	28.8	676.8	627.8
P49458	FALSE	Signal recognition particle 9 kDa protein OS=Homo sapiens OX=9606 GN=SRP9 PE=1 SV=2	SRP9; SRP9P1		14	5	1188	1283.6	1007.8	1213.5	56.1	52.3	1073.3	1268.3	623	555.7		10	3	2376.3	2073.6	169.9	136.8	6969	5269.1															0.553098	0.565263	0.512458	0.549592	0.0139178	0.0141187	0.68172	0.522709	0.279937	0.257853
P49585	FALSE	Choline-phosphate cytidylyltransferase A OS=Homo sapiens OX=9606 GN=PCYT1A PE=1 SV=2	PCYT1A															6	3	768.3	705.4	51.5	48.6	1162.4	1040.2
P49588	FALSE	Alanine--tRNA ligase, cytoplasmic OS=Homo sapiens OX=9606 GN=AARS PE=1 SV=2	AARS		37	16	3067.4	3896.9	3864.9	4988.8	278.6	264.7	2589.7	3855.2	2846.6	3198.3		70	21	13248.5	12414.7	1053.9	913.4	14637.5	13143.5		82	25	7362.4	7364.8	5765.7	6385.9	427.2	362.7	12001.7	15271.4	3829.5	4573.6		1.42809	1.71609	1.96527	2.25942	0.0691178	0.0714575	1.64488	1.58886	1.27908	1.48406
P49589	FALSE	Cysteine--tRNA ligase, cytoplasmic OS=Homo sapiens OX=9606 GN=CARS PE=1 SV=3	CARS		3	2	102.6	135.3	202.9	227.8	11.7	8.1	107.3	150.7	106.8	120.2		7	3	435.7	404.2	26	21.6	800.6	830.4		20	7	708.4	697.2	699.1	727.8	49.7	32.8	1070.1	1381.7	376.8	427.8		0.0477676	0.0595825	0.103173	0.10317	0.00290265	0.00218665	0.0681529	0.0621085	0.0479892	0.0557747
P49591	FALSE	Serine--tRNA ligase, cytoplasmic OS=Homo sapiens OX=9606 GN=SARS PE=1 SV=3	SARS		17	5	345.3	380.3	823.8	940.9	45.9	43.4	414.7	601.1	589.3	501.9		15	5	973	863	122.6	105.2	1752	1492.5		24	6	2284.4	2008.6	1201.4	1299.6	115	91.1	2857	3602.7	943.9	1045.5		0.160762	0.167474	0.418896	0.426132	0.0113873	0.0117161	0.263402	0.247733	0.264794	0.232889
P49593	FALSE	Protein phosphatase 1F OS=Homo sapiens OX=9606 GN=PPM1F PE=1 SV=3	PPM1F		2	2	63.6	79.2	68.6	84.9	4.9		74.8	102.5	42.1	55.1		6	2	735.6	619.2	58.8	44	725.1	751.9		4	2	317.1	316.7	267.2	269.2	28.9	27.1	452.4	644.6	204.6	257.2		0.0296103	0.0348776	0.0348825	0.0384511	0.00121564		0.0475102	0.0422437	0.0189171	0.0255673
P49643	FALSE	DNA primase large subunit OS=Homo sapiens OX=9606 GN=PRIM2 PE=1 SV=2	PRIM2		3	2												11	6	725.1	652.5	51.1	42.4	685.8	607.7		6	4	274	257.8	258.6	266.9	21.5	15	431.9	512.6	148	185.1
P49674	FALSE	Casein kinase I isoform epsilon OS=Homo sapiens OX=9606 GN=CSNK1E PE=1 SV=1	CSNK1E; LOC400927-CSNK1E															9	3	824.9	771.6	61.1	61.2	1223.4	983.6
P49720	FALSE	Proteasome subunit beta type-3 OS=Homo sapiens OX=9606 GN=PSMB3 PE=1 SV=2	PSMB3		25	6	1136	1317.9	854.5	1119.2	69	49.2	3036	4596.8	860	829.7		69	7	19031.1	19303.4	1268.1	1027.9	13579.1	10170.2		10	5	413.2	402.9	351.5	405.4	31.2	29.4	628.9	730.9	322.1	367.5		0.528889	0.580368	0.434506	0.506884	0.0171182	0.0132819	1.92835	1.89449	0.38643	0.384994
P49721	FALSE	Proteasome subunit beta type-2 OS=Homo sapiens OX=9606 GN=PSMB2 PE=1 SV=1	PSMB2		33	8	3049.2	3200.4	1299.4	1639.9	59.2	72.3	10087.3	14494	1392	1092.8		60	9	9531	9547.2	553.6	442.6	17776.8	12741.6		10	3	383.4	310.8	381.6	465	28.4	15	484.9	553.6	859.1	888.5		1.41962	1.40937	0.660734	0.742708	0.0146869	0.0195179	6.40708	5.97346	0.625477	0.507076
P49736	FALSE	DNA replication licensing factor MCM2 OS=Homo sapiens OX=9606 GN=MCM2 PE=1 SV=4	MCM2		51	17	2070.3	2235.7	1404.7	1741.2	174.8	197.9	2064.1	2935.6	1277.6	1267.9		100	20	10852.8	10226.2	846	734.5	11061.6	9920.1		56	14	2503.4	2316.9	2112.3	2330.8	183.7	158.1	4579	5825.7	1703.6	2086.5		0.963872	0.984543	0.714278	0.788587	0.0433661	0.0534244	1.31104	1.20986	0.574073	0.588325
P49748	FALSE	Very long-chain specific acyl-CoA dehydrogenase, mitochondrial OS=Homo sapiens OX=9606 GN=ACADVL PE=1 SV=1	ACADVL																								3	2
P49750-1	FALSE	Isoform 1 of YLP motif-containing protein 1 OS=Homo sapiens OX=9606 GN=YLPM1	YLPM1															4	2	235.8	215.3	21.7	21.3	301.5	288.1
P49755	TRUE	Transmembrane emp24 domain-containing protein 10 OS=Homo sapiens OX=9606 GN=TMED10 PE=1 SV=2	TMED10		36	9	2511	2857.3	5723.1	7196.8	230.2	269.2	3363.5	4316.8	3835.6	3589.1		57	9	5604.7	5083.3	433.5	332.8	20802.9	19175.5		24	10	1895.2	1697.4	1200.6	1137.7	53.4	39.1	2707.5	2658.2	2497.8	2827		1.16905	1.25828	2.91015	3.25942	0.0571103	0.0726723	2.13637	1.7791	1.72348	1.6654
P49756	FALSE	RNA-binding protein 25 OS=Homo sapiens OX=9606 GN=RBM25 PE=1 SV=3	RBM25		5	4	303.1	350.8	329.5	399	32.1	24.9	345.2	440.3	249.8	264.6		25	8	2475.7	2189.2	196	156.9	2479.3	2217.6		17	8	947.6	820.5	857.6	792.8	68.1	57.9	1615.5	1893.5	524.9	596.3		0.141115	0.154483	0.167548	0.180707	0.00796368	0.00672192	0.219258	0.181462	0.112244	0.122779
P49770	FALSE	Translation initiation factor eIF-2B subunit beta OS=Homo sapiens OX=9606 GN=EIF2B2 PE=1 SV=3	EIF2B2		4	2	357.2	360.2	260.7	304.5	19.4	13.5	411.5	551.7	219.8	196.2		23	5	1210.9	1153.5	88.5	83.4	3076.5	2546.1															0.166302	0.158623	0.132564	0.137908	0.00481294	0.00364441	0.261369	0.227374	0.0987643	0.0910399
P49773	FALSE	Histidine triad nucleotide-binding protein 1 OS=Homo sapiens OX=9606 GN=HINT1 PE=1 SV=2	HINT1		7	2	146.5	186.7	238.9	281.4	20.5	15.1	160	235	140.6	169.1		10	3	958.9	843.3	72.5	62.2	905.9	694.9		6	2												0.0682062	0.0822177	0.121479	0.127446	0.00508584	0.00407634	0.101626	0.0968513	0.0631768	0.078465
P49790	FALSE	Nuclear pore complex protein Nup153 OS=Homo sapiens OX=9606 GN=NUP153 PE=1 SV=2	NUP153															8	3	759.7	656	67.8	54.7	1067.1	959.3
P49792	FALSE	E3 SUMO-protein ligase RanBP2 OS=Homo sapiens OX=9606 GN=RANBP2 PE=1 SV=2	RANBP2		12	6	350.1	421	574.8	685.5	40.1	33.5	402.3	629.4	445.5	415.8		22	8	3548	3406	315.7	268.7	4922.2	4199.1		4	2	62.3	59.2	144	149.5	12.1	9.1	130.4	149.4	105.7	143.3		0.162996	0.185397	0.292281	0.310462	0.0099484	0.00904354	0.255526	0.259397	0.20018	0.192938
P49821	FALSE	NADH dehydrogenase [ubiquinone] flavoprotein 1, mitochondrial OS=Homo sapiens OX=9606 GN=NDUFV1 PE=1 SV=4	NDUFV1															5	3	468.6	392.9	59.9	54.5	1092.1	958.2		12	4	714.9	673.4	462.1	395.8	67.4	41.1	1441.1	1662	367.1	409.6
P49840	FALSE	Glycogen synthase kinase-3 alpha OS=Homo sapiens OX=9606 GN=GSK3A PE=1 SV=2	GSK3A															7	3	208.8	208.3	16.6	10.4	384	318.8
P49841	FALSE	Glycogen synthase kinase-3 beta OS=Homo sapiens OX=9606 GN=GSK3B PE=1 SV=2	GSK3B															9	3	679.2	646.2	49.3	38.3	956.6	871.3
P49902	FALSE	Cytosolic purine 5'-nucleotidase OS=Homo sapiens OX=9606 GN=NT5C2 PE=1 SV=1	NT5C2		4	2	138	188.7	58	80.4	3.1	5	185.2	266.9	47	44.8		9	2	469.8	425.8	23.1	16.3	657	714.9															0.0642488	0.0830985	0.0294925	0.036413	0.000769078	0.00134978	0.117632	0.109998	0.0211188	0.0207879
P49903	FALSE	Selenide, water dikinase 1 OS=Homo sapiens OX=9606 GN=SEPHS1 PE=1 SV=2	SEPHS1															3	2	31	30.4	5.7	5.3	47.5	47.3		7	2	215.1	202.4	124	134.8	18.1	9	263.7	339.8	88.2	97.9
P49915	FALSE	GMP synthase [glutamine-hydrolyzing] OS=Homo sapiens OX=9606 GN=GMPS PE=1 SV=1	GMPS		57	19	2124.6	2805.5	3101	4069.7	239	231.8	2364.2	3520.3	1783.9	2066.4		95	26	10545	9654.6	831.7	738.9	21633	19275.4		43	15	2248.2	2224.1	1852.7	1840.9	161.4	159.6	3155.5	3733.3	1231.3	1429.4		0.989152	1.23547	1.57683	1.84316	0.0592934	0.0625759	1.50165	1.45083	0.801573	0.958842
P49916	FALSE	DNA ligase 3 OS=Homo sapiens OX=9606 GN=LIG3 PE=1 SV=2	LIG3																								2	2
P49959	FALSE	Double-strand break repair protein MRE11 OS=Homo sapiens OX=9606 GN=MRE11 PE=1 SV=3	MRE11A; MRE11															3	2	73.9	61.8	7.4	6.3	185.5	136.1		3	2	97	93.1	89.9	86.6	12	10.7	166.9	183.7	71.5	78.2
P50148	FALSE	Guanine nucleotide-binding protein G(q) subunit alpha OS=Homo sapiens OX=9606 GN=GNAQ PE=1 SV=4	GNAQ																								4	2	259.4	238.4	187.4	182.4	9.4	8	668.9	794.4	252.2	285.8
P50213	FALSE	Isocitrate dehydrogenase [NAD] subunit alpha, mitochondrial OS=Homo sapiens OX=9606 GN=IDH3A PE=1 SV=1	IDH3A		14	7	426.1	488.5	1107.2	1279.8	69.8	56.4	453.5	609.4	806.1	736.9		2	2	64.7	60	6.6	3.8	92.1	85.5		23	7	1138.1	979.9	654.4	657.1	57.3	52	2485.3	2731.1	446.2	477.4		0.19838	0.215122	0.563002	0.57962	0.0173167	0.0152255	0.288046	0.251154	0.362211	0.341933
P50225	FALSE	Sulfotransferase 1A1 OS=Homo sapiens OX=9606 GN=SULT1A1 PE=1 SV=3	SULT1A1		6	4	53.8	60.3	1076.9	1251.7	53.2	50.1	72.3	91.3	206.9	196.4																								0.0250477	0.0265545	0.547595	0.566893	0.0131984	0.0135248	0.0459223	0.0376278	0.0929679	0.0911327
P50336	FALSE	Protoporphyrinogen oxidase OS=Homo sapiens OX=9606 GN=PPOX PE=1 SV=1	PPOX		7	2	67.3	86.2	398.7	445	16	15.3	112.3	139.9	446.2	537																								0.0313329	0.0379602	0.202736	0.20154	0.00396944	0.00413034	0.0713288	0.0576574	0.200494	0.249176
P50395	FALSE	Rab GDP dissociation inhibitor beta OS=Homo sapiens OX=9606 GN=GDI2 PE=1 SV=2	GDI2		70	15	3605.3	3986.7	3942.5	5402.6	244.6	247.7	3229.3	4684.4	3976.2	3490		92	14	6827.2	6487.3	596.6	545.5	17215.1	14342.4		48	9	2695.3	2560.4	1475.4	1571.1	198.5	128.4	4321.3	5712	1191.2	1340.8		1.67852	1.75564	2.00473	2.44683	0.0606827	0.0668682	2.05113	1.9306	1.78665	1.61941
P50402	TRUE	Emerin OS=Homo sapiens OX=9606 GN=EMD PE=1 SV=1	EMD		45	10	1496.1	1634.6	3010.8	3749.5	116.9	120.2	3810.8	5052.2	2596.6	2511.4		103	10	6013.9	5514.5	404.1	370.1	24023	21491		60	12	3045.9	2721.3	1434.4	1443.4	66.5	54.6	5113.2	4609.2	4134.1	4367.8		0.696541	0.719834	1.53097	1.69814	0.0290017	0.0324488	2.42048	2.08218	1.16675	1.16533
P50416	TRUE	Carnitine O-palmitoyltransferase 1, liver isoform OS=Homo sapiens OX=9606 GN=CPT1A PE=1 SV=2	CPT1A		3	2	35.8	53.4	91.8	99.3			79.5	106	72.2	71.8		6	2	88.9	80.7	9.3		429.5	410.8															0.0166674	0.0235159	0.0466795	0.0449728			0.0504954	0.0436861	0.0324421	0.0333163
P50454	FALSE	Serpin H1 OS=Homo sapiens OX=9606 GN=SERPINH1 PE=1 SV=2	SERPINH1		20	8	1455	1757.4	2690.5	3247.9	154.3	136.5	1511.7	2134.6	2045.9	2187.7		10	5	1363.2	1185.5	120.7	90.7	2326.6	2200.9		51	13	3968.3	3373	2341.5	2224.4	151.9	110.2	8035.1	9000.9	2357.2	2677.1		0.677406	0.773912	1.3681	1.47097	0.0382802	0.0368491	0.960175	0.87974	0.919299	1.01513
P50502	FALSE	Hsc70-interacting protein OS=Homo sapiens OX=9606 GN=ST13 PE=1 SV=2	ST13		53	10	2723.2	3183.8	13190.6	15792.9	613.4	584.9	3133.7	4232.3	4493.7	4694.8		73	11	10260.6	9155.3	716.9	594.4	20032.5	17344.9		63	14	6818.4	6006.4	3530.8	3925.1	238.1	239.2	10116.3	12069.3	4460	5133.3		1.26784	1.40206	6.70731	7.15258	0.152178	0.157898	1.99041	1.74427	2.01919	2.17846
P50570	FALSE	Dynamin-2 OS=Homo sapiens OX=9606 GN=DNM2 PE=1 SV=2	DNM2		9	4	633.9	750.1	555.2	683.7	40.7	35.4	822.3	1121.6	418.3	437		24	10	1954.1	1763.9	139	104.2	3937	3777.5		4	2	230.6	205.6	199.7	215.1	16.5	11.3	374	478.5	149.6	188.9		0.295125	0.330324	0.282315	0.309647	0.0100973	0.00955646	0.522294	0.462249	0.187958	0.202775
P50579	FALSE	Methionine aminopeptidase 2 OS=Homo sapiens OX=9606 GN=METAP2 PE=1 SV=1	METAP2		3	2	116.4	93.9	206.3	239.7	14.9	10.1	124.8	162	192	138.4		19	3	3975.1	3536.6	337.9	263.1	2465.5	2133.9		2	2	81.5	71.7	80.7	93.9	5.4	6.5	146.5	168.4	53.8	85.1		0.0541925	0.0413511	0.104902	0.10856	0.00369654	0.00272656	0.0792683	0.0667656	0.0862727	0.0642198
P50897	FALSE	Palmitoyl-protein thioesterase 1 OS=Homo sapiens OX=9606 GN=PPT1 PE=1 SV=1	PPT1		27	8	3223.6	3263.9	281.5	332.4	8.1	4.7	3464.2	4648.3	507.5	428.1		139	10	11567.7	10518.3	654.8	502.1	32097.9	25689.9		18	7	239.2	210.4	355.7	353.1	18.4	19.9	420.2	433.7	581	640.2		1.50081	1.43733	0.14314	0.150543	0.00200953	0.0012688	2.20033	1.91572	0.228039	0.198645
P50914	FALSE	60S ribosomal protein L14 OS=Homo sapiens OX=9606 GN=RPL14 PE=1 SV=4	RPL14		19	5	716.8	836.7	2295.5	2788.7	194	164.1	890.8	1136.5	1751.3	1442.5		38	7	4081.5	3040	525.6	446.1	6190.1	5319.1		30	4	3837.4	3289.5	2420.6	2098.6	182.7	160.3	4675	5978.8	1546	1684.9		0.333721	0.36846	1.16724	1.263	0.0481294	0.0442999	0.565803	0.468389	0.786924	0.669342
P50990	FALSE	T-complex protein 1 subunit theta OS=Homo sapiens OX=9606 GN=CCT8 PE=1 SV=4	CCT8		159	30	10395.9	11799.2	18983.2	24472.4	1595	981.2	21238.3	29360.4	11615	10874.7		285	31	40453.8	36474.4	3108.8	2449	82884.1	72843.9		174	30	20323.4	18957	16481.8	17221.1	996.7	854.5	30076.6	37269.6	12400.4	14599.3		4.84003	5.19605	9.6528	11.0835	0.395703	0.264881	13.4898	12.1004	5.21905	5.04603
P50991	FALSE	T-complex protein 1 subunit delta OS=Homo sapiens OX=9606 GN=CCT4 PE=1 SV=4	CCT4		101	21	5812.9	6598.2	7662.5	10495.9	548	541.6	8201	11424	6866.5	6923.3		157	25	25407.4	21952.5	1984.3	1686.3	34094.7	30891.6		102	20	9036.1	8899.3	4655.1	4875.4	421.5	353	11844.1	15133.2	3467.7	4253.4		2.70632	2.90567	3.89632	4.75358	0.135953	0.146208	5.20897	4.70821	3.08537	3.21252
P50995	FALSE	Annexin A11 OS=Homo sapiens OX=9606 GN=ANXA11 PE=1 SV=1	ANXA11		41	14	1290.3	1587.8	1227	1482.9	95.1	74.6	2825.5	3882.8	892.2	970.4		92	19	4412.1	4204.9	346.5	303.3	11084.7	8742.4		13	7	405.1	385.8	345.1	337.6	56.7	50	728.6	802.7	342.6	391.1		0.600726	0.699225	0.623919	0.671603	0.0235933	0.0201388	1.79465	1.60023	0.400899	0.450281
P51003	FALSE	Poly(A) polymerase alpha OS=Homo sapiens OX=9606 GN=PAPOLA PE=1 SV=4	PAPOLA															2	2	32.3	33	4.7	3.1	39.4	44.8
P51114	FALSE	Fragile X mental retardation syndrome-related protein 1 OS=Homo sapiens OX=9606 GN=FXR1 PE=1 SV=3	FXR1		21	10	1392.2	1612.3	975	1224.5	63.7	67.1	2313.5	2960.6	617.7	604.9		85	17	14326.4	13582.5	942.1	758.1	14571.4	12793.6		7	3	311.8	278.4	447.1	418.1	30	28	499.1	675	234.2	263.4		0.648168	0.710014	0.49578	0.554574	0.0158033	0.0181141	1.46945	1.22016	0.277556	0.280683
P51116	FALSE	Fragile X mental retardation syndrome-related protein 2 OS=Homo sapiens OX=9606 GN=FXR2 PE=1 SV=2	FXR2		4	2												28	8	1980.6	1805.6	113.9	101.4	1908.1	1917.1
P51148	FALSE	Ras-related protein Rab-5C OS=Homo sapiens OX=9606 GN=RAB5C PE=1 SV=2	RAB5C		55	5	990.7	1183.6	5900.8	7086.8	314.2	308.7	1332.2	1809.8	3436.6	3433		40	5	2971.6	2555.7	270.4	244.9	6992.5	6091		39	4	2185.9	1886.9	1961.2	1811.6	115	88.2	3584	4008.3	2632.1	2900.7		0.461241	0.521226	3.00051	3.2096	0.0779498	0.0833356	0.846164	0.745879	1.54419	1.59297
P51149	FALSE	Ras-related protein Rab-7a OS=Homo sapiens OX=9606 GN=RAB7A PE=1 SV=1	RAB7A		53	12	3443.9	3656.1	11642.2	13630.5	524.8	480.1	4022.2	5161.5	6701.7	6560.7		49	11	7963.3	7140	668.2	580.6	23815.7	20853		48	9	4194.8	3622.5	3101.2	3022.5	283.6	184.5	9605	10004	5926.5	6420.8		1.60338	1.61005	5.91996	6.17323	0.130197	0.129606	2.55475	2.12723	3.01132	3.04427
P51151	FALSE	Ras-related protein Rab-9A OS=Homo sapiens OX=9606 GN=RAB9A PE=1 SV=1	RAB9A		10	5	889.1	1017.8	2381.8	2763.7	108.1	92.2	1008.2	1293.9	1327.6	1257.4		7	3	984.3	858.9	101.8	74.6	2236.3	2023.9		3	2	196.9	155.7	211.8	173.5	10.8	7.8	346.4	427.2	448.3	461.1		0.413939	0.448212	1.21113	1.25168	0.0268185	0.02489	0.640371	0.533259	0.59654	0.583453
P51153	FALSE	Ras-related protein Rab-13 OS=Homo sapiens OX=9606 GN=RAB13 PE=1 SV=1	RAB13		18	6	362.2	366.4	1544.4	2001.5	73.6	81.7	458.9	604.1	1238.7	907.1		12	2	96.2	87.3	19.3	12.5	231.5	169.2															0.16863	0.161353	0.785315	0.906476	0.0182594	0.0220554	0.291476	0.24897	0.556594	0.420909
P51398	FALSE	28S ribosomal protein S29, mitochondrial OS=Homo sapiens OX=9606 GN=DAP3 PE=1 SV=1	DAP3		6	3	85.2	101.9	191.5	203.5	9.4	10.5	129.8	179.6	124.7	134.7		8	4	704.1	632.2	57.5	51.9	1625.6	1407.7		17	8	1358.7	1217.9	864.7	821.1	55.3	41.4	2716.5	3061.2	624.3	712		0.0396667	0.0448741	0.0973762	0.0921649	0.00233204	0.00283454	0.0824441	0.0740191	0.0560324	0.0625029
P51532	FALSE	Transcription activator BRG1 OS=Homo sapiens OX=9606 GN=SMARCA4 PE=1 SV=2	SMARCA4		3	2	56.4	74.8	74.3	93.9	5.1	5	78.6	115.1	58.3	59.6		13	6	1102.9	1013.6	104.2	83.3	1512.8	1441.7		5	2	91.2	82.6	88	77.9	6.6	5.2	131.2	156.5	69.9	87.9		0.0262582	0.0329399	0.0377809	0.0425272	0.00126526	0.00134978	0.0499238	0.0474365	0.0261964	0.0276553
P51553	FALSE	Isocitrate dehydrogenase [NAD] subunit gamma, mitochondrial OS=Homo sapiens OX=9606 GN=IDH3G PE=1 SV=1	IDH3G																								9	4	336.5	309.1	209.8	218.8	20.6	17	527.9	398.6	169.6	165.5
P51570	FALSE	Galactokinase OS=Homo sapiens OX=9606 GN=GALK1 PE=1 SV=1	GALK1																								2	2	45.5	42.1	31.2	24.1			78.1	82.7	28.7	42.1
P51571	TRUE	Translocon-associated protein subunit delta OS=Homo sapiens OX=9606 GN=SSR4 PE=1 SV=1	SSR4		19	3	257.6	282.7	1195.2	1563.1	51.8	53	498.7	665.3	993.4	722.2		26	3	714.3	601	66.3	61.1	3244.9	2551.2		19	3	1481.6	1277.8	469	489	25.3	25.4	1670.1	1465.5	1352	1482.8		0.119931	0.124494	0.607749	0.707926	0.012851	0.0143077	0.316756	0.274192	0.446372	0.335112
P51572	TRUE	B-cell receptor-associated protein 31 OS=Homo sapiens OX=9606 GN=BCAP31 PE=1 SV=3	BCAP31		96	21	2550.5	2716.2	20448.3	24481	872.1	870.9	3849.4	4728.3	16778.4	14612.3		190	22	9425.3	7866.3	522	399.8	58421.9	46656.5		79	15	5872.9	5662.7	2972	2768.8	139.8	89.1	8400.9	8179.7	10905.8	12176.8		1.18744	1.19614	10.3978	11.0874	0.216359	0.235105	2.44499	1.94869	7.53916	6.78034
P51580	FALSE	Thiopurine S-methyltransferase OS=Homo sapiens OX=9606 GN=TPMT PE=1 SV=1	TPMT		5	2
P51610	FALSE	Host cell factor 1 OS=Homo sapiens OX=9606 GN=HCFC1 PE=1 SV=2	HCFC1		12	7	506.2	640.8	1126.7	1496.5	81.6	78.2	628	849.8	454.7	506.3		19	8	2107.3	1956.3	176.1	170.7	2196.3	1813.6		16	6	376.7	390.4	362.3	301	22.9	19	487.2	600.8	194.1	215.6		0.235672	0.282191	0.572918	0.677763	0.0202441	0.0211106	0.398882	0.350231	0.204314	0.234931
P51617	FALSE	Interleukin-1 receptor-associated kinase 1 OS=Homo sapiens OX=9606 GN=IRAK1 PE=1 SV=2	IRAK1		3	2	82.7	97.3	141	159.7	7.5	10.7	232.4	304.7	62.2	58.4		5	2	310	279.6	22.3	23.8	454.7	422.3															0.0385027	0.0428483	0.0716973	0.0723279	0.00186067	0.00288853	0.147612	0.125577	0.0279488	0.0270985
P51648	TRUE	Fatty aldehyde dehydrogenase OS=Homo sapiens OX=9606 GN=ALDH3A2 PE=1 SV=1	ALDH3A2		33	10	1483.9	1666	5346.5	6598.7	223.4	258.8	2871.1	4208.7	3989.2	3704.4		86	11	5473.7	5334.3	423.5	341.5	36324.6	31538.9		44	8	2803.2	2623.9	2931.6	2826.4	141.6	114.3	3805.5	3869.8	7388.2	8048.6		0.690861	0.733662	2.71865	2.98854	0.0554232	0.0698648	1.82362	1.73455	1.7925	1.7189
P51649	FALSE	Succinate-semialdehyde dehydrogenase, mitochondrial OS=Homo sapiens OX=9606 GN=ALDH5A1 PE=1 SV=2	ALDH5A1		3	2	32.4	36	85.7	88.1	2.4	2.3	45.3	64.1	77.4	56.2											3	2	26.4	20.4	11.1	10.1			42.2	43.5	9.1	6.8		0.0150845	0.0158534	0.0435777	0.0399004	0.000595415	0.0006209	0.0287729	0.0264177	0.0347787	0.0260777
P51659	FALSE	Peroxisomal multifunctional enzyme type 2 OS=Homo sapiens OX=9606 GN=HSD17B4 PE=1 SV=3	HSD17B4		74	25	1739	1991.5	8842	11415.9	416.9	436.8	2926.1	4059.4	6626.8	5958.7		59	18	5218	4499	1039.6	376.4	16009.7	14175.6		41	14	2248.3	2234.3	1357.3	1280.1	346.4	77.9	3118.1	3189	1608.6	1747.6		0.809628	0.877004	4.49608	5.17024	0.103429	0.117917	1.85855	1.67301	2.97767	2.76493
P51665	FALSE	26S proteasome non-ATPase regulatory subunit 7 OS=Homo sapiens OX=9606 GN=PSMD7 PE=1 SV=2	PSMD7															5	2	720	606.8	63.5	48.8	1298.5	1175.9		12	4	378.1	374.2	289.5	301.5	15.9	19.7	454.5	565.2	204.9	255.6
P51790	TRUE	H(+)/Cl(-) exchange transporter 3 OS=Homo sapiens OX=9606 GN=CLCN3 PE=1 SV=2	CLCN3															6	2	610.3	611.3	43.9	31.6	1421.9	1136.1
P51798	TRUE	H(+)/Cl(-) exchange transporter 7 OS=Homo sapiens OX=9606 GN=CLCN7 PE=1 SV=2	CLCN7		6	4	383.1	411.7	271.8	305.3	9.8	9.2	453.8	598.8	188.1	203.3		4	2	624.7	580.2	32.5	21.8	1291.2	1176.4															0.17836	0.181302	0.138208	0.13827	0.00243128	0.0024836	0.288237	0.246785	0.0845203	0.0943344
P51809	TRUE	Vesicle-associated membrane protein 7 OS=Homo sapiens OX=9606 GN=VAMP7 PE=1 SV=3	VAMP7		18	4	503.1	519.5	1482.6	1861.3	74.5	82.3	548.9	770.4	942.5	857		10	3	490.1	428.7	50.8	34.2	1110.8	959		9	3	253	239.4	220.7	237.6	14.2	11.5	486.7	466	361	450.8		0.234229	0.228774	0.75389	0.84298	0.0184827	0.0222174	0.348641	0.317507	0.4235	0.397661
P51812	FALSE	Ribosomal protein S6 kinase alpha-3 OS=Homo sapiens OX=9606 GN=RPS6KA3 PE=1 SV=1	RPS6KA3		29	9	2126.7	2404.5	642	823.3	46.3	47.1	1260.9	1792.2	536.1	505.9		34	6	4269.9	4322.8	417.3	379.3	4563.4	3532.8		8	3	68.3	67.4	84.7	95.9	4.3	4.9	103.3	141.1	48.8	59.6		0.99013	1.05888	0.326452	0.372871	0.0114866	0.012715	0.800877	0.738625	0.24089	0.234745
P51858	FALSE	Hepatoma-derived growth factor OS=Homo sapiens OX=9606 GN=HDGF PE=1 SV=1	HDGF		15	6	604.2	949.2	873.7	1009.6	54.8	46.5	680.5	949.2	329	434.1		44	12	5227.8	4026.4	385.4	272.8	4835.2	4956.1		39	10	2956.4	2351.4	1872.1	1808.9	118.8	76.2	2615.6	3221.5	969.3	1179.4		0.281298	0.418002	0.444269	0.457246	0.0135953	0.012553	0.432228	0.391197	0.147832	0.201429
P51970	FALSE	NADH dehydrogenase [ubiquinone] 1 alpha subcomplex subunit 8 OS=Homo sapiens OX=9606 GN=NDUFA8 PE=1 SV=3	NDUFA8		5	2	490.5	505.1	891.7	1166.2	67	60.3	758	1035.6	847.7	632.6		5	2	904	780.3	84.2	72.3	2666.4	1998.3															0.228363	0.222433	0.453422	0.52817	0.016622	0.0162784	0.481453	0.426805	0.380903	0.293536
P51991	FALSE	Heterogeneous nuclear ribonucleoprotein A3 OS=Homo sapiens OX=9606 GN=HNRNPA3 PE=1 SV=2	HNRNPA3		97	18	8759.8	10626.8	4046.3	5001.7	399.4	380.2	17725.7	24188.8	3300.5	3583.1		240	16	17744.9	16614.5	1387.9	1181.5	41764.9	33120.3		75	14	6711.1	5957.8	6010.6	5984.5	646.9	560.2	14215.6	16255.1	4620	4779.1		4.07831	4.67976	2.05751	2.26526	0.099087	0.102637	11.2587	9.96901	1.48304	1.66261
P52209	FALSE	6-phosphogluconate dehydrogenase, decarboxylating OS=Homo sapiens OX=9606 GN=PGD PE=1 SV=3	PGD		27	9	972.7	925.1	1611.1	2011.6	106.7	103.8	914.6	1024.5	1520.9	1159.1		25	8	1574.7	1385.4	140.6	140.6	2428.3	1983.2		35	10	1076.7	959.4	751.2	783.7	59.9	55.3	1998.8	2217.2	533	632.7		0.452861	0.407389	0.819231	0.911051	0.0264712	0.0280215	0.58092	0.42223	0.683397	0.53784
P52272	FALSE	Heterogeneous nuclear ribonucleoprotein M OS=Homo sapiens OX=9606 GN=HNRNPM PE=1 SV=3	HNRNPM		151	30	5558.7	6203.7	8497.4	10354.2	611.7	581.6	10500.4	15359.5	6652	6645.9		227	32	25929.7	24419.3	2644.9	2327.3	46935.4	42151.3		221	28	7933.4	7377.7	9216.5	9481.9	920.6	722.7	27701.3	32747.2	10131.3	11204.8		2.58797	2.73194	4.32086	4.6894	0.151756	0.157007	6.66946	6.33016	2.98899	3.0838
P52292	FALSE	Importin subunit alpha-1 OS=Homo sapiens OX=9606 GN=KPNA2 PE=1 SV=1	KPNA2		54	12	2178.9	2254.5	984.8	1231.7	106.6	106.1	3823.3	5309.7	1082.2	928.5		159	17	15725	14882.1	1084	912	27905.9	23955.1		41	8	1560.7	1619.2	1035.6	1005.1	51	49.6	1810.5	2040.6	863.4	1019.3		1.01443	0.992822	0.500763	0.557835	0.0264464	0.0286424	2.42842	2.1883	0.486273	0.430838
P52294	FALSE	Importin subunit alpha-5 OS=Homo sapiens OX=9606 GN=KPNA1 PE=1 SV=3	KPNA1		2	2	140.2	155.1	142.8	156	15.8	18	164.7	214.8	114.9	98.2		8	4	1094.4	1070.5	102.3	99.7	1380.5	1266.2		3	2	68.7	78.7	71.9	87.9	5	7.2	127	156.7	57.7	49.1		0.0652731	0.0683019	0.0726126	0.0706522	0.00391982	0.00485922	0.104611	0.0885262	0.0516288	0.0455663
P52298	FALSE	Nuclear cap-binding protein subunit 2 OS=Homo sapiens OX=9606 GN=NCBP2 PE=1 SV=1	NCBP2																								4	2	374.7	294.6	221	179.8	27.6	20.3	1120.4	1279.4	197.5	208
P52306	FALSE	Rap1 GTPase-GDP dissociation stimulator 1 OS=Homo sapiens OX=9606 GN=RAP1GDS1 PE=1 SV=3	RAP1GDS1		5	4	121.6	151.3	307.7	404.2	22.4	22.2	131.5	209.1	390.8	389.9		4	2	297.5	272.4	26.4	23.8	401.7	346.7															0.0566134	0.0666285	0.156463	0.183062	0.00555721	0.00599304	0.0835239	0.0861771	0.175601	0.18092
P52434	FALSE	DNA-directed RNA polymerases I, II, and III subunit RPABC3 OS=Homo sapiens OX=9606 GN=POLR2H PE=1 SV=4	POLR2H															5	3	276.1	225.3	22.2	19.1	475.1	388.1
P52564	FALSE	Dual specificity mitogen-activated protein kinase kinase 6 OS=Homo sapiens OX=9606 GN=MAP2K6 PE=1 SV=1	MAP2K6		11	4	200.3	225.3	201.5	270	9.7	11.8	250.1	367.6	161.2	164.2		9	4	1612.8	1542.8	134.2	98.7	2507.2	2146.8		4	2	42.9	34.7	31.8	33.3	4.8		72.4	88.3	24.1	26.9		0.0932539	0.0992161	0.102461	0.122283	0.00240647	0.00318549	0.158854	0.1515	0.0724332	0.0761914
P52565	FALSE	Rho GDP-dissociation inhibitor 1 OS=Homo sapiens OX=9606 GN=ARHGDIA PE=1 SV=3	ARHGDIA		25	5	1229.7	1359.2	2724.9	3417.2	124	134.9	1300.3	1657	1932.7	1706.6		53	5	2814.4	2248.4	219	178.3	4753.2	4124.2		28	5	1512.3	1341.9	854.8	868.6	57.9	56.2	1984.9	2698	713.5	883.8		0.572513	0.598556	1.38559	1.54764	0.0307631	0.0364171	0.825902	0.682905	0.868434	0.791889
P52569	TRUE	Cationic amino acid transporter 2 OS=Homo sapiens OX=9606 GN=SLC7A2 PE=1 SV=2	SLC7A2		11	3	263.6	282.2	332	446.4	15.8	24.8	192.8	292.9	274.2	236.9		10	2	265.3	241.1	19.6	16.7	587.8	465.5															0.122725	0.124273	0.168819	0.202174	0.00391982	0.00669492	0.122459	0.120714	0.123208	0.109925
P52597	FALSE	Heterogeneous nuclear ribonucleoprotein F OS=Homo sapiens OX=9606 GN=HNRNPF PE=1 SV=3	HNRNPF		84	11	5319.8	5185.6	3291.5	4377.5	202.2	197.1	7743.6	11103.3	2956.4	2277.6		153	11	7817.2	8041.1	481.9	425.7	17649.9	13103.1		46	6	1421.2	1216.5	1886.2	2082.9	132.4	119.7	3698.6	4468.1	1393.1	1510.3		2.47674	2.2836	1.6737	1.98256	0.0501637	0.0532084	4.91845	4.57604	1.32842	1.05684
P52701	FALSE	DNA mismatch repair protein Msh6 OS=Homo sapiens OX=9606 GN=MSH6 PE=1 SV=2	MSH6		21	8	570.1	687.4	578.4	680.3	35.2	32.8	978.1	1429.4	426.9	449.2		28	9	1932.9	1753.6	144.6	117.3	2297.1	2273		12	6	217.4	197.6	307.1	289.6	17.6	19.3	433.3	497	203.3	232.5		0.265422	0.302713	0.294112	0.308107	0.00873276	0.00885457	0.621253	0.589103	0.191822	0.208436
P52732	FALSE	Kinesin-like protein KIF11 OS=Homo sapiens OX=9606 GN=KIF11 PE=1 SV=2	KIF11		2	2	112.3	151	77.8	121	4.9	5.2	203.8	280.1	59.7	59.6		11	6	1261.8	1087.4	85.2	72.7	1795.1	1924.3		3	2												0.0522836	0.0664964	0.0395607	0.0548007	0.00121564	0.00140377	0.129446	0.115439	0.0268254	0.0276553
P52756	FALSE	RNA-binding protein 5 OS=Homo sapiens OX=9606 GN=RBM5 PE=1 SV=2	RBM5															4	3	533.2	485.1	35.9	24.8	782.5	724.6
P52788	FALSE	Spermine synthase OS=Homo sapiens OX=9606 GN=SMS PE=1 SV=2	SMS		5	2	25.5	34.6	111.8	118.7	5.4	3.6	32.8	54.8	80.4	78.3		4	2	164.4	162.1	27.3	24.9	252	223.6		5	3	38.4	32.2	32.6	32.3	5.5	4	66.3	88	20.9	23.9		0.0118721	0.0152369	0.0568494	0.0537591	0.00133968	0.000971844	0.0208333	0.0225849	0.0361267	0.0363324
P52789	FALSE	Hexokinase-2 OS=Homo sapiens OX=9606 GN=HK2 PE=1 SV=2	HK2		30	13	483.1	544	708.4	830.1	42.7	33.2	847.5	1163.9	587.3	522.5		80	18	5581.1	5196.4	459.8	381.7	10234.8	9461		45	14	984.2	900.1	1219	1201.1	76.8	58.1	1451.3	1656.9	2785.7	3101.6		0.224917	0.239563	0.360216	0.375951	0.0105934	0.00896256	0.5383	0.479682	0.263896	0.242448
P52815	FALSE	39S ribosomal protein L12, mitochondrial OS=Homo sapiens OX=9606 GN=MRPL12 PE=1 SV=2	MRPL12		3	2	150.6	172.8	302.6	385.5	19.1	17.9	195.9	236.5	240.4	232.8		6	2	755.2	575.1	59	42.9	1262.8	1148.2		16	5	3706.3	2835.2	620.2	527.8	26.5	26.3	3777.2	3904.8	712.5	740.6		0.070115	0.0760965	0.15387	0.174592	0.00473851	0.00483222	0.124428	0.0974695	0.108021	0.108023
P52888	FALSE	Thimet oligopeptidase OS=Homo sapiens OX=9606 GN=THOP1 PE=1 SV=2	THOP1		7	4	789.7	860.7	1197.6	981.2	171.3	43	1000.2	1403.7	566.6	553.2		12	6	2309.3	2081.9	188.6	158.4	3043.1	2637.3		9	5	774	715.9	729	731.5	46.6	39.5	1094	1389.4	543.3	645.4		0.367661	0.379029	0.60897	0.444384	0.0424978	0.0116081	0.63529	0.578511	0.254594	0.256693
P52907	FALSE	F-actin-capping protein subunit alpha-1 OS=Homo sapiens OX=9606 GN=CAPZA1 PE=1 SV=3	CAPZA1		10	5	411.8	455.7	449.2	583.4	43.5	40.7	580.4	791.2	353.1	335.8		51	10	3607.7	3303.9	330.2	264.6	5876.4	5045.7		21	9	775.8	688	595.9	603.9	61.5	38.4	1486.2	1828.1	563.2	645.2		0.191722	0.200678	0.228415	0.264221	0.0107919	0.0109872	0.368648	0.32608	0.158661	0.155816
P52926	FALSE	High mobility group protein HMGI-C OS=Homo sapiens OX=9606 GN=HMGA2 PE=1 SV=1	HMGA2																								5	2	181.9	212.8	206	149.9	20.3	16.7	216.8	241.6	125.1	162.6
P52948	FALSE	Nuclear pore complex protein Nup98-Nup96 OS=Homo sapiens OX=9606 GN=NUP98 PE=1 SV=4	NUP98		6	5												11	6	632.4	573.3	51.7	51.6	839.8	733.3		2	2
P53004	FALSE	Biliverdin reductase A OS=Homo sapiens OX=9606 GN=BLVRA PE=1 SV=2	BLVRA		8	5	61.7	75	112.6	133			80.9	104.1	71	75.7		9	4	265.4	226.3	16.7	12.4	314.2	308.6		8	4	281	240.7	205.9	205.2	14.3	15.8	583.8	664.5	177.5	222.2		0.0287257	0.033028	0.0572562	0.0602355			0.0513847	0.0429031	0.0319029	0.035126
P53007	TRUE	Tricarboxylate transport protein, mitochondrial OS=Homo sapiens OX=9606 GN=SLC25A1 PE=1 SV=2	SLC25A1		41	11	292.3	330	2789.8	3161	131.8	125.7	654.2	821.9	1960.6	1831.9		33	5	421.2	359.5	30	30.7	2682.6	2436		17	5	1533.5	1299.9	467.4	475.4	30	27.7	2107.6	2051.6	1390.2	1504.3		0.136086	0.145323	1.41859	1.43161	0.0326982	0.0339335	0.415523	0.338732	0.880971	0.85003
P53041	FALSE	Serine/threonine-protein phosphatase 5 OS=Homo sapiens OX=9606 GN=PPP5C PE=1 SV=1	PPP5C		23	9	958.8	1111.6	1047.3	1388.5	63.2	59.8	1210.2	1769.7	750.6	743.1		31	10	2938.2	2750.5	215	162	3442.5	2980.8		16	5	599.7	574	498	525.1	42.7	30.1	803.6	902.3	300.1	350.9		0.446389	0.489519	0.532543	0.62885	0.0156793	0.0161434	0.768674	0.729352	0.337273	0.34481
P53350	FALSE	Serine/threonine-protein kinase PLK1 OS=Homo sapiens OX=9606 GN=PLK1 PE=1 SV=1	PLK1		10	4	190.5	212.4	211.8	294.1	17.2	11.5	292.6	395.6	95.6	121.1		22	6	1876.2	1695.7	122.4	97.6	2441.1	2209.1															0.0886913	0.0935353	0.107699	0.133197	0.00426714	0.0031045	0.185849	0.16304	0.0429566	0.0561923
P53365	FALSE	Arfaptin-2 OS=Homo sapiens OX=9606 GN=ARFIP2 PE=1 SV=1	ARFIP2		16	8	188.6	205	796.4	1000.2	36.9	31.1	249.8	290.9	325.1	274.7		14	5	345.4	308.8	34.3	20.8	627	628		5	2												0.0878067	0.0902766	0.404963	0.452989	0.00915451	0.00839565	0.158664	0.11989	0.14608	0.127465
P53597	FALSE	Succinate--CoA ligase [ADP/GDP-forming] subunit alpha, mitochondrial OS=Homo sapiens OX=9606 GN=SUCLG1 PE=1 SV=4	SUCLG1															12	3	1058.2	900.4	99.4	92.8	2275.1	2112.8		15	3	905.2	750.9	352.2	379.8	36.9	21.1	1716.6	1902.7	411.4	435.6
P53609	FALSE	Geranylgeranyl transferase type-1 subunit beta OS=Homo sapiens OX=9606 GN=PGGT1B PE=1 SV=2	PGGT1B															6	2	2083.1	2128.8	108.5	87.3	961.5	815.6
P53611	FALSE	Geranylgeranyl transferase type-2 subunit beta OS=Homo sapiens OX=9606 GN=RABGGTB PE=1 SV=2	RABGGTB		4	3	224.8	206	405.5	589.4	23.3	23.5	494.5	692.6	206.3	160.2		26	7	1471.2	1407.1	136.4	123	5257.3	4263.3		3	3	128	121.7	228.6	280.7	20.6	18.5	187.3	219.4	354.7	446.8		0.10466	0.0907169	0.206193	0.266938	0.00578049	0.00634398	0.314088	0.285443	0.0926983	0.0743353
P53618	FALSE	Coatomer subunit beta OS=Homo sapiens OX=9606 GN=COPB1 PE=1 SV=3	COPB1		23	11	1431.3	1523.2	2240.3	2928.2	155	140.5	1750.2	2448	2084.3	1803.7		34	14	4935.3	4811.6	443.2	398.7	6485.2	5383.9		28	12	1133.5	1013.3	912.5	915.5	78	61.6	1828	2207.2	696	821.3		0.666372	0.670777	1.13917	1.32618	0.0384539	0.0379289	1.11166	1.0089	0.936554	0.836945
P53621	FALSE	Coatomer subunit alpha OS=Homo sapiens OX=9606 GN=COPA PE=1 SV=2	COPA		46	20	1589.7	1936.3	2284.7	2735.5	169.5	162.4	1389.1	2040.9	1853	1940.6		74	19	6734.5	6348.3	600.3	554.7	9967.7	8909.8		40	12	1236.3	1135.7	1135.1	1136.4	96.7	74.8	1942.9	2308.9	799.8	955.3		0.740118	0.852695	1.16175	1.2389	0.0420512	0.0438409	0.882304	0.841123	0.832622	0.900469
P53634	FALSE	Dipeptidyl peptidase 1 OS=Homo sapiens OX=9606 GN=CTSC PE=1 SV=2	CTSC		9	4	954.6	1038.6	192	262.4	13.9	13.8	948.2	1191.7	186	162.1		26	6	3098.9	2717.6	204.5	179.8	6490.5	5433.7															0.444434	0.457372	0.0976304	0.118841	0.00344845	0.0037254	0.602261	0.491139	0.0835767	0.0752169
P53680	FALSE	AP-2 complex subunit sigma OS=Homo sapiens OX=9606 GN=AP2S1 PE=1 SV=2	AP2S1															4	2	167.8	150.9	19	15.1	310.6	253.9
P53701	FALSE	Cytochrome c-type heme lyase OS=Homo sapiens OX=9606 GN=HCCS PE=1 SV=1	HCCS		55	14	1578.8	1713.5	5027.8	6175.9	232	243.5	5197.4	6824.8	3156.1	2745.5		65	12	3640.4	3302.9	257.1	232.4	15174.1	13264.7		42	12	3230	2696.3	2665.9	2363.4	147.7	125.7	4644.1	4895.6	6490.2	6544.5		0.735044	0.75458	2.5566	2.79706	0.0575568	0.0657344	3.30119	2.81273	1.41815	1.27395
P53985	TRUE	Monocarboxylate transporter 1 OS=Homo sapiens OX=9606 GN=SLC16A1 PE=1 SV=3	SLC16A1		33	8	3264.4	3520.5	9181.4	11410.8	492.8	499.1	2382.6	3028.5	5111.4	5542.2		37	5	9613.1	8327.5	789.1	592.6	24171.8	21647.4		30	5	6132.9	5841.6	2643.7	2531	158.8	115	6774.9	6782	4795.9	6085.1		1.51981	1.55033	4.66867	5.16793	0.122259	0.134735	1.51334	1.24815	2.29674	2.57167
P53990	FALSE	IST1 homolog OS=Homo sapiens OX=9606 GN=IST1 PE=1 SV=1	IST1															3	2	299.7	268.6	25.8	24	474.6	407.2
P53992	FALSE	Protein transport protein Sec24C OS=Homo sapiens OX=9606 GN=SEC24C PE=1 SV=3	SEC24C		10	5	289.8	355.5	807.5	986.8	53.8	56.1	519.1	708.6	269.3	335.2		11	5	524.1	464	39.8	32.6	959.9	903.9															0.134922	0.156553	0.410607	0.44692	0.0133472	0.0151446	0.329713	0.292038	0.121007	0.155538
P53999	FALSE	Activated RNA polymerase II transcriptional coactivator p15 OS=Homo sapiens OX=9606 GN=SUB1 PE=1 SV=3	SUB1		18	4	1598.6	1456.2	3320.9	1851	287.7	351.9	3852.4	2555.2	950.1	900.9		28	6	5839.4	5139.8	971.8	778.2	6005.8	6151.8		26	5	3709.9	1476.9	1229.7	1744.3	407.2	333.6	3274.7	3824.2	2074.9	1041.6		0.744262	0.641272	1.68865	0.838315	0.0713754	0.0949977	2.4469	1.05308	0.426915	0.418032
P54105	FALSE	Methylosome subunit pICln OS=Homo sapiens OX=9606 GN=CLNS1A PE=1 SV=1	CLNS1A		9	3	395.8	366.5	140.3	189.2	13.3	8.7	372.4	524.9	140.3	97.4		17	5	1764	1657.3	135.5	110.5	2751.4	2364.8															0.184273	0.161397	0.0713414	0.0856884	0.00329959	0.00234862	0.236535	0.216329	0.063042	0.0451951
P54136	FALSE	Arginine--tRNA ligase, cytoplasmic OS=Homo sapiens OX=9606 GN=RARS PE=1 SV=2	RARS		74	27	4558.7	5225.2	9390.2	12242.5	528.7	480.7	4927.3	6722.7	6015.7	5571.6		107	26	15019.8	14076.2	1226.2	1030.8	18510.9	15650.8		68	22	5240.4	4823.8	3575.4	3618.4	275.6	222	8019.4	10137.3	2200.2	2678.2		2.1224	2.30104	4.77484	5.54461	0.131165	0.129768	3.12964	2.77065	2.70308	2.58531
P54577	FALSE	Tyrosine--tRNA ligase, cytoplasmic OS=Homo sapiens OX=9606 GN=YARS PE=1 SV=4	YARS		22	11	1184.3	1601	2236.4	2858.3	252.5	151.3	1473.4	2213.2	1531.9	1817.3		24	10	2830.3	2474.6	244.9	232.8	3851.7	3546.8		40	16	3589.1	3308.9	2412	2456.8	219.5	147.2	4962.6	5920.4	1960.4	2435.4		0.551376	0.705038	1.13719	1.29452	0.0626427	0.0408444	0.935849	0.912133	0.68834	0.843256
P54578	FALSE	Ubiquitin carboxyl-terminal hydrolase 14 OS=Homo sapiens OX=9606 GN=USP14 PE=1 SV=3	USP14		6	5	308	359.1	348.5	452.5	23.6	23	367.8	510.2	317.2	311.1		12	6	536.2	465.3	47	46.3	853.9	762.1		12	7	259.8	233.5	151.8	176.6	8.9	8.9	404	524.8	132.6	182.8		0.143396	0.158138	0.177209	0.204937	0.00585492	0.006209	0.233613	0.21027	0.14253	0.144355
P54619	FALSE	5'-AMP-activated protein kinase subunit gamma-1 OS=Homo sapiens OX=9606 GN=PRKAG1 PE=1 SV=1	PRKAG1															7	2	901.7	804.3	70.4	54.9	2261.9	2104.9
P54709	TRUE	Sodium/potassium-transporting ATPase subunit beta-3 OS=Homo sapiens OX=9606 GN=ATP1B3 PE=1 SV=1	ATP1B3		16	5	122.8	128	589.2	659.2	41.6	36.1	195.8	253.1	261.3	277		14	5	843.2	762.8	105.7	108.1	2748.7	2237.4		18	6	701	622.2	242.4	247.2	20.2	18.3	722	796.5	532.7	629.2		0.0571721	0.0563678	0.299603	0.298551	0.0103205	0.00974543	0.124365	0.104311	0.117412	0.128532
P54727	FALSE	UV excision repair protein RAD23 homolog B OS=Homo sapiens OX=9606 GN=RAD23B PE=1 SV=1	RAD23B		8	4	426.1	521.8	432.3	517.3	30.4	18.5	665.8	855.8	349.1	376		21	7	3131.3	2886.8	205.8	158.3	8322.2	7317.9		11	4	1080.5	852.5	488.2	495.3	31.9	25.4	1301.1	1330.3	717.2	799.9		0.19838	0.229787	0.219821	0.234284	0.00754193	0.0049942	0.422891	0.352704	0.156864	0.17447
P54802	FALSE	Alpha-N-acetylglucosaminidase OS=Homo sapiens OX=9606 GN=NAGLU PE=1 SV=2	NAGLU		5	3	310.9	394.5	79	98.2	3.3	4.3	320.8	452.9	67.2	76.8		62	13	5515.1	5088.6	349.1	280.5	8111.5	6912.8															0.144746	0.173727	0.0401709	0.0444746	0.000818696	0.00116081	0.20376	0.186655	0.0301955	0.0356364
P54819	FALSE	Adenylate kinase 2, mitochondrial OS=Homo sapiens OX=9606 GN=AK2 PE=1 SV=2	AK2		24	10	1464.9	1740.2	3397.5	4122.7	216.4	167.6	1911.7	2436.2	2535.2	2612.5		26	8	4479.1	3583	355.8	273.7	9272.6	8454.7		32	9	5146.7	4437.7	2298	2140.1	124.7	126	6461.5	7396.5	2166	2425.4		0.682015	0.766338	1.7276	1.86716	0.0536866	0.0452447	1.21424	1.00404	1.13916	1.21224
P54886	FALSE	Delta-1-pyrroline-5-carboxylate synthase OS=Homo sapiens OX=9606 GN=ALDH18A1 PE=1 SV=2	ALDH18A1		58	21	1689.4	1864.8	4233	4849.2	249.5	213.9	3624.9	5395.3	2838.9	2283		56	20	5737.1	5351.1	590.9	572	12976.4	11775		34	10	1513.2	1404.3	1152	1076.4	91.4	66.9	2312.6	2612	1144.2	1356.9		0.786536	0.821208	2.15245	2.1962	0.0618984	0.0577437	2.3024	2.22358	1.27562	1.05935
P54920	FALSE	Alpha-soluble NSF attachment protein OS=Homo sapiens OX=9606 GN=NAPA PE=1 SV=3	NAPA		16	7	733.1	990.5	1238.2	1446.1	188.6	164	982.4	1322	858.5	1126.2		22	7	2566.1	2368.1	202.2	174.4	5261.2	4947.1		20	10	1082.5	947.8	613.2	589.7	65.3	62	2897.5	3153.5	668.2	740.3		0.34131	0.43619	0.629615	0.654937	0.0467897	0.0442729	0.623984	0.54484	0.385756	0.522574
P55010	FALSE	Eukaryotic translation initiation factor 5 OS=Homo sapiens OX=9606 GN=EIF5 PE=1 SV=2	EIF5		44	16	4171.9	4223.8	1273	1565.7	125.1	124.4	4322	6038.1	1112.6	1056		122	22	12384	12484.2	826.4	681	21262.6	17906.9		19	2	930.7	877.9	765.4	763.3	41	40.6	1531.5	2069.9	784.9	990.5		1.94232	1.86005	0.64731	0.709103	0.031036	0.0335826	2.74517	2.4885	0.499933	0.49
P55011	TRUE	Solute carrier family 12 member 2 OS=Homo sapiens OX=9606 GN=SLC12A2 PE=1 SV=1	SLC12A2															2	2
P55036	FALSE	26S proteasome non-ATPase regulatory subunit 4 OS=Homo sapiens OX=9606 GN=PSMD4 PE=1 SV=1	PSMD4															10	4	563.6	493.4	47.9	47.4	822.9	756.7		4	3	107.1	91.4	54.1	59.6	3.4		172.2	235.8	54	54.1
P55039	FALSE	Developmentally-regulated GTP-binding protein 2 OS=Homo sapiens OX=9606 GN=DRG2 PE=1 SV=1	DRG2		7	3	42.2	60.2	189.9	233.9	12	12.9	44.8	73.5	110.8	131.3		11	3	410.1	372.1	32.1	34.5	625.1	596.1		13	5	1576.3	1355.1	824.4	841.5	120.6	73.4	2290.3	2914.3	585.3	688.8		0.0196471	0.0265105	0.0965626	0.105933	0.00297708	0.00348244	0.0284553	0.0302918	0.0497866	0.0609252
P55060	FALSE	Exportin-2 OS=Homo sapiens OX=9606 GN=CSE1L PE=1 SV=3	CSE1L		215	41	10914	12637.3	11377.4	14168.9	687.2	670.6	43798.5	63881.5	11242.5	10187.7		336	43	28119.2	26926.3	2273.8	1936.8	110823	92799.1		134	29	7952.1	7108.2	7619.4	8680.7	532.3	497	12466.3	14874.5	6018.7	6875		5.08124	5.56513	5.78531	6.41707	0.170487	0.181033	27.8192	26.3277	5.05167	4.72725
P55061	TRUE	Bax inhibitor 1 OS=Homo sapiens OX=9606 GN=TMBIM6 PE=1 SV=2	TMBIM6		4	2	87.8	86.4	793.5	949.3	44.7	38	151.3	201.8	653.9	668.8																								0.0408771	0.0380483	0.403488	0.429937	0.0110896	0.0102583	0.0961001	0.0831685	0.293822	0.310334
P55072	FALSE	Transitional endoplasmic reticulum ATPase OS=Homo sapiens OX=9606 GN=VCP PE=1 SV=4	VCP		171	36	8995.1	9686.8	16417.5	18515.1	889.7	783.4	8685.4	12307.5	17873.1	14243.6		171	36	23335.1	21986.2	1840.4	1608.7	36291	32494.4		169	34	11553.7	10551.3	6842.2	6976	561.7	412.1	16777.4	20239	6157.8	7137.3		4.18786	4.26581	8.34816	8.38546	0.220725	0.211484	5.51664	5.07233	8.03105	6.60925
P55081	FALSE	Microfibrillar-associated protein 1 OS=Homo sapiens OX=9606 GN=MFAP1 PE=1 SV=2	MFAP1															6	3	379.6	306.8	32.6	26.4	478.4	494.2		2	2	94.9	84.7	94.1	84.1	3.3	2	184.1	223.3	51.1	66.9
P55084	FALSE	Trifunctional enzyme subunit beta, mitochondrial OS=Homo sapiens OX=9606 GN=HADHB PE=1 SV=3	HADHB		57	19	967.2	1225.1	8271.5	9826.2	528.3	510.3	1289.6	1691.6	6827.7	6776.4		24	10	1490.9	1251.5	265.5	211.7	3567.9	3182.8		44	16	5663.4	4893.1	2063.7	1974	313	241.1	7436.9	7341.6	2465	2737.6		0.4503	0.539501	4.20599	4.45027	0.131066	0.137759	0.819106	0.697165	3.06794	3.14436
P55145	FALSE	Mesencephalic astrocyte-derived neurotrophic factor OS=Homo sapiens OX=9606 GN=MANF PE=1 SV=3	MANF																								9	3	132.2	116	99.2	94.1	12.6	12.5	189.5	115.8	64.9	78
P55209	FALSE	Nucleosome assembly protein 1-like 1 OS=Homo sapiens OX=9606 GN=NAP1L1 PE=1 SV=1	NAP1L1		91	11	4904.1	4867.4	1779.6	2289.1	137.8	147.5	11621.8	18108.2	1827.6	1432.5		89	10	7903.2	8181.1	573	531.2	16405.9	12860		45	6	963.5	887.6	1051	1215.3	82.4	63.6	2037.4	2761.9	728.9	865.4		2.28321	2.14347	0.904912	1.03673	0.0341868	0.0398186	7.38173	7.46299	0.821209	0.664702
P55263	FALSE	Adenosine kinase OS=Homo sapiens OX=9606 GN=ADK PE=1 SV=2	ADK		7	3	70.2	109.9	156	192.8	12.9	6.6	94.9	133	138.4	161.9		7	4	282.9	271.2	36.2	36.5	426	352		4	2	146.1	134.1	94.6	114.8	14.6	14.6	235.9	280	61.1	73		0.0326831	0.048397	0.0793247	0.0873188	0.00320036	0.00178171	0.0602769	0.0548137	0.0621883	0.0751241
P55265	FALSE	Double-stranded RNA-specific adenosine deaminase OS=Homo sapiens OX=9606 GN=ADAR PE=1 SV=4	ADAR		23	12	1076.5	1398.4	1525.1	1900.3	114	96.1	1557.8	2226	804.4	911.8		40	14	2380.1	2186.1	180.9	175.7	2975.8	2676.4		15	8	345.2	336.8	701.3	663.3	54.5	37	880.6	969.9	391.9	458.8		0.501187	0.615818	0.775501	0.860643	0.0282822	0.0259428	0.989456	0.917409	0.361447	0.423089
P55327	FALSE	Tumor protein D52 OS=Homo sapiens OX=9606 GN=TPD52 PE=1 SV=2	TPD52															12	5	371.1	375.6	24.3	19.6	1515.7	1298.9
P55735	FALSE	Protein SEC13 homolog OS=Homo sapiens OX=9606 GN=SEC13 PE=1 SV=3	SEC13		70	10	11987.4	13292.3	909.8	1106.2	82.4	62.6	1573.9	1922.3	1247.3	1140.5		23	6	1865.1	1774.6	151.7	131.8	2369.5	2046		14	4	560.1	482.4	493.2	571.1	86.9	69	749.4	916.6	358.7	410.7		5.58099	5.85358	0.462626	0.500996	0.0204426	0.0168993	0.999682	0.792244	0.560458	0.52921
P55769	FALSE	NHP2-like protein 1 OS=Homo sapiens OX=9606 GN=SNU13 PE=1 SV=3	NHP2L1; SNU13		13	4	719.3	805.2	285.7	328.4	45.1	33	314.7	389.1	219.9	217.7		9	5	1268.3	1071.8	239.6	214.5	1643	1647.4		12	4	659.4	563.3	497.4	465.1	139.9	110.5	1393.3	1456.2	413	415.6		0.334885	0.354589	0.145276	0.148732	0.0111888	0.00890857	0.199886	0.160361	0.0988093	0.101016
P55786	FALSE	Puromycin-sensitive aminopeptidase OS=Homo sapiens OX=9606 GN=NPEPPS PE=1 SV=2	NPEPPS		88	28	12671.5	12323.9	4048.9	5164.9	329.7	266.4	10477.6	15254.7	3997.8	3491.5		154	32	23656.8	23776.7	1579.7	1317.9	25279.2	23434.7		48	19	3995.5	3600	3522.5	3673.8	262.3	194.8	5273.8	6528.5	2724.7	3381.4		5.89948	5.42712	2.05883	2.33918	0.0817952	0.0719164	6.65498	6.28697	1.79636	1.62011
P55795	FALSE	Heterogeneous nuclear ribonucleoprotein H2 OS=Homo sapiens OX=9606 GN=HNRNPH2 PE=1 SV=1	HNRNPH2		135	7	2501.7	2764.4	1315	1696.1	99.1	113.1	3990.2	5817.7	1224.2	1147.7		258	6	8080.1	7809.4	645.2	559	15868.4	13209.6		77	5	1314.2	1210.6	1611	1586.8	112.9	89	3662.2	4220.2	1434.6	1655.1		1.16472	1.21737	0.668667	0.768161	0.0245857	0.0305321	2.53443	2.39767	0.550079	0.532551
P55809	FALSE	Succinyl-CoA:3-ketoacid coenzyme A transferase 1, mitochondrial OS=Homo sapiens OX=9606 GN=OXCT1 PE=1 SV=1	OXCT1																								11	5	491.2	467	268	243.4	28.2	21.4	1009.5	1101.3	211.4	239.9
P55884	FALSE	Eukaryotic translation initiation factor 3 subunit B OS=Homo sapiens OX=9606 GN=EIF3B PE=1 SV=3	EIF3B		19	7	1324.3	1582.1	913.7	1111.6	66.9	59.8	1382.7	2037.6	727.3	705.7		93	20	13004.4	11544.3	880.7	739.4	20357.5	17772.2		46	14	3084	2905.2	3267.2	3239.9	234.1	165.7	3952.8	4981.6	2012.4	2417.6		0.616556	0.696715	0.464609	0.503442	0.0165972	0.0161434	0.878239	0.839763	0.326803	0.327456
P55899	TRUE	IgG receptor FcRn large subunit p51 OS=Homo sapiens OX=9606 GN=FCGRT PE=1 SV=1	FCGRT															5	2	182.2	139.5	16.3	10.1	353.1	351.2
P56134	TRUE	ATP synthase subunit f, mitochondrial OS=Homo sapiens OX=9606 GN=ATP5MF PE=1 SV=3	ATP5J2		19	2	282.8	322.8	731.6	962.7	39.7	42.5	471.3	667.4	561.9	498.4		9	2	393.7	352.3	46.2	51.7	1375.2	1207.4															0.131663	0.142153	0.372013	0.436005	0.00984916	0.0114732	0.299352	0.275058	0.252483	0.231265
P56181	FALSE	NADH dehydrogenase [ubiquinone] flavoprotein 3, mitochondrial OS=Homo sapiens OX=9606 GN=NDUFV3 PE=1 SV=2	NDUFV3																								2	2	161	105.2	49.8	38.4	3.2		185.4	189	40.8	46.8
P56182	FALSE	Ribosomal RNA processing protein 1 homolog A OS=Homo sapiens OX=9606 GN=RRP1 PE=1 SV=1	RRP1		16	5	441.3	589.1	757	868.2	46.9	31.6	1246.5	1693.4	436.5	404.5		32	9	2330.6	2059.2	193.8	159.5	7811.3	6798.4		13	5	983.3	891.2	967.5	820.2	53.9	53	1803.8	1934.9	725.6	796.6		0.205456	0.259424	0.384928	0.393207	0.0116354	0.00853063	0.79173	0.697906	0.196136	0.187694
P56192	FALSE	Methionine--tRNA ligase, cytoplasmic OS=Homo sapiens OX=9606 GN=MARS PE=1 SV=2	MARS		40	13	2389.6	2866.6	2589.1	3101.1	213.9	180	1855.7	2891.5	2027.4	1957.7		71	19	6699.5	6223.4	551.2	480.7	12880.7	11487.9		55	15	2381.5	2202	2109.7	2178.2	162.6	137.3	3534.3	4720.7	1472.7	1680.7		1.11253	1.26237	1.31654	1.40448	0.0530664	0.0485922	1.17867	1.19168	0.910986	0.908403
P56270	FALSE	Myc-associated zinc finger protein OS=Homo sapiens OX=9606 GN=MAZ PE=1 SV=1	MAZ															4	2	77	70.9	14.9	21.8	109.9	83.4
P56282	FALSE	DNA polymerase epsilon subunit 2 OS=Homo sapiens OX=9606 GN=POLE2 PE=1 SV=2	POLE2															6	3	542	513.7	33.8	30.7	320.1	323.6
P56378	TRUE	6.8 kDa mitochondrial proteolipid OS=Homo sapiens OX=9606 GN=MP68 PE=1 SV=1	C14orf2		5	2	76.3	68.9	533	631.8	13	24.3	193.6	222.3	392.4	281.9																								0.0355231	0.0303417	0.271026	0.286141	0.00322517	0.00655994	0.122967	0.0916172	0.17632	0.130806
P56385	FALSE	ATP synthase subunit e, mitochondrial OS=Homo sapiens OX=9606 GN=ATP5ME PE=1 SV=2	ATP5I		8	2	93.6	100	447.6	560.7	16.6	17.6	438.9	489.5	333.8	315.3		19	2	955.4	805.4	70.7	52.5	6444.8	5093.6															0.0435774	0.0440373	0.227601	0.25394	0.00411829	0.00475124	0.278773	0.201739	0.149989	0.146304
P56537	FALSE	Eukaryotic translation initiation factor 6 OS=Homo sapiens OX=9606 GN=EIF6 PE=1 SV=1	EIF6															3	2
P56545	FALSE	C-terminal-binding protein 2 OS=Homo sapiens OX=9606 GN=CTBP2 PE=1 SV=1	CTBP2		9	2	333.3	371.7	670.2	754.6	39.1	38.8	461.6	468.7	443.1	420.5		9	4	747.6	666.8	81.5	67.2	981.7	898.2		12	4	455.4	423.6	429	418.4	42.1	32.2	956.3	1176	340.4	416.8		0.155175	0.163687	0.340791	0.341757	0.00970031	0.0104743	0.293191	0.193167	0.199101	0.195119
P56556	FALSE	NADH dehydrogenase [ubiquinone] 1 alpha subcomplex subunit 6 OS=Homo sapiens OX=9606 GN=NDUFA6 PE=1 SV=4	NDUFA6		4	2	94.9	124.8	201.9	253.6	13.3	9.8	143.7	184.6	115.3	165.3		6	2	495.4	405.8	43.7	39	993	876.2		10	2	1192.1	1046.2	757.3	696.3	52	40.6	2151.5	1865	859	969.5		0.0441827	0.0549586	0.102664	0.114855	0.00329959	0.00264557	0.0912729	0.0760798	0.0518086	0.0767018
P56589	TRUE	Peroxisomal biogenesis factor 3 OS=Homo sapiens OX=9606 GN=PEX3 PE=1 SV=1	PEX3		5	3	169.4	198.4	392.1	515	21.9	23.8	277.1	439.2	310.8	265.9		8	3	122.4	110	11.8	9	453	392.6		2	2												0.0788677	0.0873701	0.19938	0.233243	0.00543316	0.00642497	0.176004	0.181009	0.139654	0.123382
P56962	TRUE	Syntaxin-17 OS=Homo sapiens OX=9606 GN=STX17 PE=1 SV=2	STX17		3	2	86.6	84	210.8	272.8	12.1	11.9	111.9	151	171.1	128.7																								0.0403185	0.0369914	0.10719	0.123551	0.00300189	0.00321248	0.0710747	0.0622321	0.0768816	0.0597188
P57081	FALSE	tRNA (guanine-N(7)-)-methyltransferase non-catalytic subunit WDR4 OS=Homo sapiens OX=9606 GN=WDR4 PE=1 SV=2	WDR4															3	2	219.2	213.1	24.3	23	289.8	209.8
P57088	TRUE	Transmembrane protein 33 OS=Homo sapiens OX=9606 GN=TMEM33 PE=1 SV=2	TMEM33		55	9	1406.4	1417.8	8460	10335.5	291.4	312.9	2651.8	3695.3	9200.4	7080.1		51	7	3680.5	3300.5	227.9	199	14801.6	13481.1		16	5	1034.1	911.3	601.6	596.6	31.1	15.8	1424.5	1492.4	1736.5	1968.7		0.654779	0.624361	4.30184	4.68093	0.0722933	0.0844694	1.68432	1.52296	4.13408	3.28528
P57105	TRUE	Synaptojanin-2-binding protein OS=Homo sapiens OX=9606 GN=SYNJ2BP PE=1 SV=2	SYNJ2BP		7	3	112.5	124.1	524.9	611.7	25.4	17.5	175.8	233.3	437.1	400.7		4	2	188.9	173.5	17.8	15.1	716.4	593.9		10	3	312.1	272.8	127.3	143.9	9.3	7.6	532.1	565.2	458.7	509.5		0.0523767	0.0546503	0.266907	0.277038	0.00630148	0.00472424	0.111662	0.0961507	0.196405	0.185931
P57678	FALSE	Gem-associated protein 4 OS=Homo sapiens OX=9606 GN=GEMIN4 PE=1 SV=2	GEMIN4		23	10	1271.5	1814.1	2835.5	3404	168.4	132.9	2402.4	3800.9	1629	1801.8		17	5	3279	3011.8	262.1	206.9	4602.6	4538		10	3	765.2	733.7	1872.3	1871.4	126.6	109.4	1622.6	1814.2	1419.2	1898.2		0.591974	0.798881	1.44183	1.54167	0.0417783	0.0358772	1.52591	1.56648	0.73197	0.836063
P57740	FALSE	Nuclear pore complex protein Nup107 OS=Homo sapiens OX=9606 GN=NUP107 PE=1 SV=1	NUP107		8	5	245.7	282.8	287.7	307.1	22.7	19.9	407.5	582.2	170.5	183.9		27	10	1216.9	1207.9	135.6	112.4	1858	1691.2															0.114391	0.124538	0.146293	0.139085	0.00563164	0.00537214	0.258829	0.239944	0.076612	0.0853325
P59998	FALSE	Actin-related protein 2/3 complex subunit 4 OS=Homo sapiens OX=9606 GN=ARPC4 PE=1 SV=3	ARPC4		6	3	126.9	136.3	158.6	183.7	16.4	16.1	110.5	155.1	125.2	116.5		5	2								11	3	181	157.7	104.9	117.1	10.9	8.4	307	275.8	95.3	91.6		0.059081	0.0600229	0.0806468	0.0831975	0.00406867	0.0043463	0.0701855	0.0639219	0.056257	0.0540578
P60033	TRUE	CD81 antigen OS=Homo sapiens OX=9606 GN=CD81 PE=1 SV=1	CD81															10	2	243.7	195.2	13.3	11.1	1199.9	953.3
P60174-1	FALSE	Isoform 2 of Triosephosphate isomerase OS=Homo sapiens OX=9606 GN=TPI1	TPI1		78	17	4414.4	4620.7	11592.1	15209	911.9	877.2	3280.3	3848	9695.6	7637.1		85	13	7833.1	6386.2	1166.2	1164.9	11958.8	9257		113	17	10699	9320.3	5213.9	5583.2	846.7	675.6	14772.2	19964.1	3794	4131.6		2.05522	2.03483	5.89449	6.88813	0.226233	0.236806	2.08352	1.58589	4.35659	3.54373
P60228	FALSE	Eukaryotic translation initiation factor 3 subunit E OS=Homo sapiens OX=9606 GN=EIF3E PE=1 SV=1	EIF3E		30	13	1534.5	1469.7	1944.9	2458.5	105.9	126.8	1917.4	2736.6	1718	1246.6		68	15	5171.4	5092.6	349.2	312.3	13634.6	10736.6		23	8	1005.3	911.1	674.8	770.3	54.6	52.2	1886.1	2410.5	620.5	802.4		0.714419	0.647217	0.988966	1.11345	0.0262727	0.0342305	1.21786	1.12784	0.771961	0.578442
P60468	TRUE	Protein transport protein Sec61 subunit beta OS=Homo sapiens OX=9606 GN=SEC61B PE=1 SV=2	SEC61B		5	2	112.3	94.5	1212.5	1590.7	20.9	51	246.5	261.8	973.4	640.9											6	2	1013.3	809.4	444	448	25.6	23.5	1454.2	1567.9	1424.3	1570		0.0522836	0.0416153	0.616546	0.720426	0.00518507	0.0137678	0.156568	0.107896	0.437385	0.297388
P60510	FALSE	Serine/threonine-protein phosphatase 4 catalytic subunit OS=Homo sapiens OX=9606 GN=PPP4C PE=1 SV=1	PPP4C		4	3	54	48.4	54.7	73.8	2.7		80	114.4	52.6	35.6		6	4	352.5	333.7	39.2	33.8	629.6	510.9															0.0251408	0.0213141	0.0278145	0.0334239	0.000669842		0.050813	0.047148	0.0236351	0.016519
P60602	TRUE	Reactive oxygen species modulator 1 OS=Homo sapiens OX=9606 GN=ROMO1 PE=1 SV=1	ROMO1		7	2	61.6	63.6	446.7	511.6	18	19.5	132.1	157.6	355.9	298.2																								0.0286792	0.0280078	0.227143	0.231703	0.00446561	0.00526415	0.083905	0.0649522	0.159919	0.138369
P60660	FALSE	Myosin light polypeptide 6 OS=Homo sapiens OX=9606 GN=MYL6 PE=1 SV=2	MYL6		29	7	1863.6	1876.1	1567.6	2223.1	115.3	115	1692.8	2142.4	1141.2	1005.7		40	7	4726.7	4433.6	363.1	309.4	5967.3	5085		21	7	952.4	836.1	835.8	847.3	64	50.2	2087.8	2233.9	617.9	689.7		0.867638	0.826185	0.797112	1.00684	0.0286047	0.031045	1.0752	0.882954	0.512784	0.46666
P60709	FALSE	Actin, cytoplasmic 1 OS=Homo sapiens OX=9606 GN=ACTB PE=1 SV=1	ACTB		313	9	21174.8	22648.7	25118.7	32212.4	2194.9	2073.9	19811.9	26529.9	22745.7	21531		621	10	68834.8	62479.6	5743.2	4876.2	96628.7	81196.7		559	10	36940.1	31701.4	19144.7	20406.1	1831.9	1413.6	68979.5	79256.6	19319.9	21810.3		9.85837	9.97389	12.7727	14.5889	0.544532	0.559863	12.5838	10.9339	10.2205	9.99072
P60842	FALSE	Eukaryotic initiation factor 4A-I OS=Homo sapiens OX=9606 GN=EIF4A1 PE=1 SV=1	EIF4A1		160	13	16476.2	19155.9	13777.4	17176.6	845	745.1	14756.6	20997.7	12147.3	12133		252	12	41295.7	37651.7	2750.3	2193.2	42296.5	38059.7		189	13	14920.8	14084.3	10267.3	11022.1	704.4	579.5	27784.5	34735.8	7250.9	8787.4		7.67084	8.43575	7.0057	7.77926	0.209636	0.201145	9.37284	8.65385	5.45823	5.6299
P60866	FALSE	40S ribosomal protein S20 OS=Homo sapiens OX=9606 GN=RPS20 PE=1 SV=1	RPS20		14	4	600.7	647.6	1123.3	1397.1	118.9	99.2	951.9	1153.4	776.5	697.4		42	4	3003.3	2300.3	310.6	263	6375.5	5385.1		27	4	1186.1	994.5	767.5	789.2	84.8	75.7	1917.2	1855.9	752.1	861.8		0.279669	0.285186	0.571189	0.632745	0.0294979	0.0267797	0.604611	0.475354	0.34891	0.323604
P60891	FALSE	Ribose-phosphate pyrophosphokinase 1 OS=Homo sapiens OX=9606 GN=PRPS1 PE=1 SV=2	PRPS1		11	2	813	863.2	1475	1874.9	183	175.7	1649.5	2238.4	1159.1	1038.4		35	5	4498.5	4008.3	600.6	576.8	14501	11084.4		17	4	1296	1171.5	745.1	782.1	136.1	95.6	1735.1	2287.3	504.2	579.9		0.378509	0.38013	0.750025	0.849139	0.0454004	0.0474314	1.0477	0.922519	0.520827	0.481834
P60900	FALSE	Proteasome subunit alpha type-6 OS=Homo sapiens OX=9606 GN=PSMA6 PE=1 SV=1	PSMA6		61	12	4440.6	4797.6	6936.3	9094.3	363.4	337.5	7597.3	10000.1	2881.9	2411.2		89	12	7951.5	7587.2	582	527	18841.8	14114.9		22	6	2211.1	1821.1	1253.8	1501	142.4	113	3159	3044.1	1099.5	1220.8		2.06741	2.11274	3.52705	4.1188	0.0901558	0.0911103	4.82552	4.12137	1.29494	1.11883
P60953	FALSE	Cell division control protein 42 homolog OS=Homo sapiens OX=9606 GN=CDC42 PE=1 SV=2	CDC42		34	4	1249.1	1326.9	4406	5766.8	250.9	247.3	1413.3	1836.1	3109.5	2538		24	4	2008.2	1872.8	195.1	165	4412.1	3444.6		30	4	2270.2	1939.6	1129.1	1155.3	134.6	116.9	4475.3	5384.1	1569.5	1513.8		0.581545	0.584332	2.24041	2.61178	0.0622457	0.0667603	0.897675	0.756718	1.39721	1.17767
P60981	FALSE	Destrin OS=Homo sapiens OX=9606 GN=DSTN PE=1 SV=3	DSTN		15	6	287.6	280.3	442.1	570.3	42.3	36.4	347.2	426	309.8	236.6		21	4	531.9	546.2	65.8	54.8	780.1	611.6		13	3	237.5	197.4	229.6	234.2	18.9	20.2	390.2	469.5	174.2	208.6		0.133898	0.123437	0.224804	0.258288	0.0104942	0.00982642	0.220528	0.175569	0.139205	0.109786
P60983	FALSE	Glia maturation factor beta OS=Homo sapiens OX=9606 GN=GMFB PE=1 SV=2	GMFB		3	2	38	37.7	134.4	171.9	13.3	15.2	32.7	51.6	108.5	108											3	2	114.1	104.9	65.2	72.2	11.8	9.5	257.9	335.9	64	64.4		0.0176917	0.0166021	0.0683413	0.0778533	0.00329959	0.00410334	0.0207698	0.0212661	0.0487531	0.0501137
P61006	FALSE	Ras-related protein Rab-8A OS=Homo sapiens OX=9606 GN=RAB8A PE=1 SV=1	RAB8A		34	2	339.8	386.7	2194.7	2656.7	113.4	101.1	368.5	517.4	1290.1	1245.5		24	3	429.3	367.5	30.7	24.6	940.2	796.1		35	2	122.6	115.5	96.9	87.1	14.1	7.5	244	248.8	92.8	113.7		0.158201	0.170292	1.11599	1.20322	0.0281334	0.0272926	0.234057	0.213238	0.57969	0.577931
P61011	FALSE	Signal recognition particle 54 kDa protein OS=Homo sapiens OX=9606 GN=SRP54 PE=1 SV=1	SRP54		38	16	934.5	972.9	4886	5923	217.8	210.7	1590.4	2168.8	3783.2	3509.1		37	14	1964.2	1748.9	149.1	122.7	5752.9	5007.3		37	12	3329.1	2843.7	1821.2	1906.3	137.9	122.3	5501.3	6605.8	2367	2664.2		0.435076	0.428439	2.48449	2.68252	0.0540339	0.0568798	1.01016	0.893834	1.69993	1.62828
P61019	FALSE	Ras-related protein Rab-2A OS=Homo sapiens OX=9606 GN=RAB2A PE=1 SV=1	RAB2A		37	8	1093.1	1156.1	5094.8	6199.3	195.2	197.2	1578.8	1962.3	3722.9	3233.8		44	8	2393.2	2080.3	206.4	177.1	7794.3	6551.1		19	6	443.2	403.8	385.7	352.2	27.6	22.9	851.3	936.3	815.4	892.7		0.508916	0.509116	2.59066	2.80765	0.0484271	0.0532354	1.00279	0.808729	1.67284	1.50053
P61020	FALSE	Ras-related protein Rab-5B OS=Homo sapiens OX=9606 GN=RAB5B PE=1 SV=1	RAB5B		18	2	171.2	253.4	1467	1654.1	56.6	56.3	327.4	418.2	567.9	859.2																								0.0797058	0.111591	0.745957	0.749139	0.0140419	0.0151986	0.207952	0.172354	0.255179	0.398682
P61026	FALSE	Ras-related protein Rab-10 OS=Homo sapiens OX=9606 GN=RAB10 PE=1 SV=1	RAB10		40	5	995.9	1035.5	4958.7	6098.8	164.3	184.5	1230.3	1531.2	3495.2	2939.6		49	8	8219.1	7303.3	595.3	672.5	28242.6	23516.9		46	6	2507	2193.2	1742.2	1762	127.3	88.8	4304.2	4362.1	3516.6	3721.9		0.463662	0.456007	2.52146	2.76214	0.0407611	0.049807	0.781441	0.631058	1.57052	1.36402
P61077	FALSE	Ubiquitin-conjugating enzyme E2 D3 OS=Homo sapiens OX=9606 GN=UBE2D3 PE=1 SV=1	UBE2D3		2	2
P61081	FALSE	NEDD8-conjugating enzyme Ubc12 OS=Homo sapiens OX=9606 GN=UBE2M PE=1 SV=1	UBE2M		13	5	228	260.3	347.9	434.7	28.8	26.1	418.6	544.6	302.5	270.1		18	5	1386	1201.6	139.6	111.4	2223.9	1785		14	6	1064.2	900.3	497.6	523.1	56.4	44.7	1958.3	2313.3	397.4	449.4		0.10615	0.114629	0.176904	0.196875	0.00714498	0.00704587	0.265879	0.224448	0.135925	0.125331
P61086	FALSE	Ubiquitin-conjugating enzyme E2 K OS=Homo sapiens OX=9606 GN=UBE2K PE=1 SV=3	UBE2K		8	3	49.4	60	159.8	197.8	7.9	4.8	43.1	66	124	117.2		11	4								11	4	276.8	278.6	252.6	276	15.3	13.6	396.6	472.7	162.4	192		0.0229992	0.0264224	0.081257	0.0895833	0.00195991	0.00129579	0.0273755	0.0272008	0.0557178	0.0543826
P61088	FALSE	Ubiquitin-conjugating enzyme E2 N OS=Homo sapiens OX=9606 GN=UBE2N PE=1 SV=1	UBE2N		5	3	413.8	512	940.6	1285	53.9	52.1	431.2	533.3	507.6	489		6	2	711.3	501	52.7	36.4	971.8	815.4		14	3	2492.3	2184.2	1202.5	1321.3	71.5	60.1	2904.9	3957	1099.7	1368.1		0.192653	0.225471	0.478287	0.581975	0.013372	0.0140647	0.273882	0.219791	0.228084	0.226904
P61106	FALSE	Ras-related protein Rab-14 OS=Homo sapiens OX=9606 GN=RAB14 PE=1 SV=4	RAB14		41	12	2116	2318.4	9180.7	11381.1	381.4	371.1	3237.2	3985.7	5416.7	4779.2		27	8	2488.9	2128.3	172.9	136.1	6466	5580.6		16	6	882.3	808	622.8	584.1	35.6	18	1507.3	1579.8	956.6	1054.2		0.985148	1.02096	4.66831	5.15448	0.0946214	0.100181	2.05615	1.64264	2.43392	2.21762
P61158	FALSE	Actin-related protein 3 OS=Homo sapiens OX=9606 GN=ACTR3 PE=1 SV=3	ACTR3		24	7	718.6	885.2	1105.2	1227.4	72.8	74.5	1186.6	1748	751.5	815.6		31	7	2675.8	2529.2	225.5	195	4098.4	4122.6		25	7	787.5	691.9	693.3	731.8	63.9	55.5	1467.7	1637.4	523.6	567.9		0.334559	0.389819	0.561985	0.555888	0.0180609	0.0201118	0.753684	0.720409	0.337677	0.378451
P61160	FALSE	Actin-related protein 2 OS=Homo sapiens OX=9606 GN=ACTR2 PE=1 SV=1	ACTR2		15	5	1297.8	1380.6	1259	1600.7	84.8	75	1516.1	2055.7	1057.1	1009.4		18	4	2915	2679.4	221.4	176	4029.9	3399		16	4	1110.1	937.6	647.3	661.9	79	51.1	2348.2	2828.1	552.6	676		0.604218	0.60798	0.640191	0.724955	0.021038	0.0202467	0.96297	0.847222	0.474994	0.468377
P61163	FALSE	Alpha-centractin OS=Homo sapiens OX=9606 GN=ACTR1A PE=1 SV=1	ACTR1A		15	6	1184.7	1402.3	1376.9	1694.7	84.7	72.4	1556.5	1959.2	1017.1	1036		20	6	3035	2524.2	233.5	189.7	4723.5	4316.5		17	6	1035.7	965.4	772	722.2	40.6	35.2	1693	2127.9	751.8	937		0.551562	0.617536	0.700142	0.767527	0.0210132	0.0195449	0.988631	0.807451	0.457021	0.48072
P61201	FALSE	COP9 signalosome complex subunit 2 OS=Homo sapiens OX=9606 GN=COPS2 PE=1 SV=1	COPS2		23	8	713.1	881	658.4	757	46.7	44.7	690.1	1020.2	409.4	446.4		32	8	5143.8	5017.4	425.3	375.5	6455.7	5211.6		29	7	1033.4	949.7	769.7	817.1	66.3	56.2	1532.6	1990.9	569.9	624		0.331999	0.387969	0.334791	0.342844	0.0115858	0.0120671	0.438326	0.420458	0.183959	0.207137
P61204	FALSE	ADP-ribosylation factor 3 OS=Homo sapiens OX=9606 GN=ARF3 PE=1 SV=2	ARF3		35	4	1973.3	2178.9	6153.4	7872.8	232.7	285.4	4926.5	7390.5	4903.2	4149.5		56	3	3659.5	3224.5	262.2	217	17050.8	12435.1		31	4	2241.4	1973.8	1654.7	1904.6	151.1	125.8	4202.9	5218.1	2088.8	2523.4		0.918711	0.95953	3.12895	3.56558	0.0577305	0.0770456	3.12913	3.04587	2.20319	1.92543
P61221	FALSE	ATP-binding cassette sub-family E member 1 OS=Homo sapiens OX=9606 GN=ABCE1 PE=1 SV=1	ABCE1		27	11	1331.7	1677.7	1457.6	1960	100.4	97.4	1475.2	2054.3	1060	1089.1		50	11	7372.4	6748.2	539	440.2	10510.2	9448.8		42	10	2857	2585.3	2047.5	2126.3	125.7	107.2	4438.4	5701.8	1509.6	1871		0.620001	0.738815	0.741178	0.887681	0.0249082	0.0262938	0.936992	0.846645	0.476297	0.505359
P61224	FALSE	Ras-related protein Rap-1b OS=Homo sapiens OX=9606 GN=RAP1B PE=1 SV=1	RAP1B		33	2	1291.9	1340.4	6644	8273.3	250.8	302.7	1752.6	2249.7	4094	3390.3		23	2	2472.2	2138.4	198	168.4	8545.7	6889.2		17	7	1336.1	1214	925.9	869.5	63.1	51.8	2520.2	2367.9	1432.2	1528.5		0.601471	0.590277	3.37842	3.74697	0.0622209	0.0817158	1.11319	0.927176	1.83959	1.57315
P61225	FALSE	Ras-related protein Rap-2b OS=Homo sapiens OX=9606 GN=RAP2B PE=1 SV=1	RAP2B		7	3	331.9	349.6	758	854.7	37.3	33.7	388.2	478.5	352.4	333		11	5	526.9	445.1	24.7	15.4	2465.9	2079.1															0.154523	0.153955	0.385437	0.387092	0.00925375	0.00909754	0.24657	0.197206	0.158346	0.154517
P61247	FALSE	40S ribosomal protein S3a OS=Homo sapiens OX=9606 GN=RPS3A PE=1 SV=2	RPS3A		67	17	4338.6	4840.5	9094.4	11855.4	632	590.6	4796.7	6214	6324.9	6105.6		98	16	18513.9	14731.2	1993.6	1700.1	22369.6	19013.1		104	19	14787.3	12203.1	5894.7	5937.3	496	442.5	20686.7	24365.2	4428.1	5215.5		2.01993	2.13163	4.62443	5.36929	0.156793	0.159436	3.04668	2.561	2.84201	2.83309
P61254	FALSE	60S ribosomal protein L26 OS=Homo sapiens OX=9606 GN=RPL26 PE=1 SV=1	RPL26		8	3	444	542.7	320.9	427.1	44.1	33.3	408.7	498.4	262.8	270.5											18	5	1252.6	1207.9	760.7	659.1	55.2	70	1667.6	1846.8	569.5	672.9		0.206714	0.238991	0.163175	0.193433	0.0109408	0.00898955	0.259591	0.205407	0.118086	0.125516
P61289	FALSE	Proteasome activator complex subunit 3 OS=Homo sapiens OX=9606 GN=PSME3 PE=1 SV=1	PSME3		18	6	1538	1669.9	1296.9	1679	274.7	255.4	1327.6	1861	1050.7	1095.6		41	10	6477.8	6351.3	471.7	399.7	10685.5	8612.4		15	6	626.8	581	675.4	663.2	60.3	53.6	873.1	1085.5	459.2	601.2		0.716048	0.73538	0.659463	0.760417	0.0681502	0.0689469	0.843242	0.76698	0.472119	0.508375
P61313	FALSE	60S ribosomal protein L15 OS=Homo sapiens OX=9606 GN=RPL15 PE=1 SV=2	RPL15		13	6	426.8	487.6	708.8	928.4	181.4	175.1	563.4	654.9	713.9	592.8		33	5	3684.8	3058.6	706.1	598.6	7558.7	5975.8		14	5	468.6	444.5	290	261.9	74.3	64.9	702.6	825.2	389.7	345.8		0.198706	0.214726	0.360419	0.420471	0.0450035	0.0472694	0.357851	0.269906	0.320782	0.275068
P61326	FALSE	Protein mago nashi homolog OS=Homo sapiens OX=9606 GN=MAGOH PE=1 SV=1	MAGOH		8	3	1693.9	1777.1	655.1	796.4	34.5	48	371.4	441.6	425.9	393.1		23	5	3202.1	2793.4	192.4	136.9	9919.5	7736.9		6	2	211	185.4	142.7	136.2	11.3	10.9	206.9	174.5	76	92.1		0.788631	0.782588	0.333113	0.360688	0.00855909	0.0129579	0.235899	0.181998	0.191373	0.182405
P61353	FALSE	60S ribosomal protein L27 OS=Homo sapiens OX=9606 GN=RPL27 PE=1 SV=2	RPL27		11	5	494.5	471.3	869.3	1136.7	88.4	70.6	574.2	691.7	829.8	677.5		25	6	3292.3	2497.1	625.8	544.6	4716.3	3726.7		12	3	1608.1	1560.9	749.9	617.5	49.9	59.9	1635.6	1903.1	716.5	834		0.230225	0.207548	0.442032	0.51481	0.0219311	0.0190589	0.36471	0.285073	0.37286	0.314371
P61421	FALSE	V-type proton ATPase subunit d 1 OS=Homo sapiens OX=9606 GN=ATP6V0D1 PE=1 SV=1	ATP6V0D1		15	6	436.5	513.2	688.9	871.4	43.3	37.6	597.7	790.9	493.2	515.1		25	6	1565.7	1441.3	96.9	81.8	3716.5	3385		12	4	429	358.5	288	267.6	21.4	18.8	724.2	819.1	340.7	378.2		0.203222	0.226	0.3503	0.394656	0.0107423	0.0101504	0.379637	0.325956	0.221613	0.239014
P61457	FALSE	Pterin-4-alpha-carbinolamine dehydratase OS=Homo sapiens OX=9606 GN=PCBD1 PE=1 SV=2	PCBD1																								2	2
P61513	FALSE	60S ribosomal protein L37a OS=Homo sapiens OX=9606 GN=RPL37A PE=1 SV=2	RPL37A		9	3	339	363.1	471	626.9	68.9	67	478.9	624.4	478.9	344.4		33	4	1912.5	1731.6	309	278	3868.3	2974.6		10	3	942	782.5	551.9	521.1	118.6	78	1370.9	1678.8	688.4	649.8		0.157829	0.1599	0.2395	0.283922	0.0170934	0.0180871	0.304179	0.257336	0.215188	0.159807
P61586	FALSE	Transforming protein RhoA OS=Homo sapiens OX=9606 GN=RHOA PE=1 SV=1	RHOA		15	7	778	796.8	2199.5	2654.8	129	134.3	740.4	963.1	1436.6	1266.8		8	6	1816.3	1571.4	183.9	165.9	2806.5	2360		8	4	1102.5	897.3	691.4	730.4	82.2	66.2	2105.3	2828.9	625.9	764		0.362214	0.35089	1.11843	1.20236	0.0320036	0.0362552	0.470274	0.396925	0.645518	0.587815
P61601	FALSE	Neurocalcin-delta OS=Homo sapiens OX=9606 GN=NCALD PE=1 SV=2	NCALD		4	2	65	70	227.9	255.6	6.7	7.6	244.2	355.1	175.6	145.7																								0.0302621	0.0308261	0.115885	0.115761	0.0016622	0.00205167	0.155107	0.146348	0.0789036	0.0676071
P61604	FALSE	10 kDa heat shock protein, mitochondrial OS=Homo sapiens OX=9606 GN=HSPE1 PE=1 SV=2	HSPE1		8	4	759.9	1000.9	1177.8	1623.9	105	115.6	780.9	1061.6	964.2	1090.4		9	5	1306.7	1056.5	132.1	71.1	3204.6	3175.9		38	8	8899	7211.5	2410.2	2040.9	151	105.1	11834.6	12064.2	2294	2895.7		0.353787	0.44077	0.598902	0.735462	0.0260494	0.031207	0.495998	0.437521	0.433251	0.505963
P61619	TRUE	Protein transport protein Sec61 subunit alpha isoform 1 OS=Homo sapiens OX=9606 GN=SEC61A1 PE=1 SV=2	SEC61A1		44	5	1448.8	1498.3	9782.7	11844.7	223.8	328	3027.1	3962	9326.3	7390.3		62	11	4705.1	4163.1	284.1	233.2	24818	20319.6		32	8	3220.2	2690.4	1504.9	1373.5	70.4	47	5674.7	6189.8	4332.8	4490.6		0.674519	0.659812	4.97442	5.36445	0.0555225	0.0885457	1.9227	1.63287	4.19065	3.42921
P61758	FALSE	Prefoldin subunit 3 OS=Homo sapiens OX=9606 GN=VBP1 PE=1 SV=3	VBP1		21	8	1116.2	1105.7	960.5	1340.3	56.1	55.1	1753.8	2230.1	532.2	427.9		30	11	2164.4	2056.7	141.2	117.5	5450.4	4238.1		11	4	452.8	352.9	288.5	311.4	20	9	577.7	480.5	248.7	281.8		0.51967	0.486921	0.488406	0.60702	0.0139178	0.0148746	1.11395	0.919098	0.239137	0.198552
P61803	TRUE	Dolichyl-diphosphooligosaccharide--protein glycosyltransferase subunit DAD1 OS=Homo sapiens OX=9606 GN=DAD1 PE=1 SV=3	DAD1		13	3	247.8	254.7	1780.7	2036.8	70.1	67.6	426.9	533.4	1693.8	1204.6		8	2	198.9	170.2	15.8	11.8	597.2	528.2		10	3	223.6	194.8	132.4	121.8	8.8	6	459.6	479.4	249.2	283.1		0.115368	0.112163	0.905471	0.922464	0.0173911	0.0182491	0.271151	0.219832	0.761087	0.558953
P61916	FALSE	NPC intracellular cholesterol transporter 2 OS=Homo sapiens OX=9606 GN=NPC2 PE=1 SV=1	NPC2		56	6	6860.2	8361.5	1281.8	1549.6	60.1	69.6	6705.3	7576	2184.8	1857.8		51	6	6005.7	4898.4	321	232.7	17384.4	13578.9		9	2	108.1	91.3	326.4	350.1	14.7	15.6	194.7	198.3	522.9	633.3		3.19391	3.68218	0.651785	0.701812	0.0149102	0.018789	4.25896	3.12232	0.981712	0.862048
P61923	FALSE	Coatomer subunit zeta-1 OS=Homo sapiens OX=9606 GN=COPZ1 PE=1 SV=1	COPZ1		13	3	568.3	710.4	1641.5	1840.4	66.1	67.2	1066.2	1339.8	1050.8	1116.2		11	2	999.2	784.4	67.2	53.9	1860.7	1986.8		8	2	679.6	572.6	473	464	28.2	23.4	1583.5	1541.4	502.8	513		0.264584	0.312841	0.834689	0.833514	0.0163987	0.0181411	0.67721	0.552176	0.472164	0.517934
P61927	FALSE	60S ribosomal protein L37 OS=Homo sapiens OX=9606 GN=RPL37 PE=1 SV=2	RPL37															13	2	341.5	295.6	110.9	59	608.3	543.7
P61956	FALSE	Small ubiquitin-related modifier 2 OS=Homo sapiens OX=9606 GN=SUMO2 PE=1 SV=3	SUMO2		6	2	167.2	187.4	292	353.3	24	18.7	238.3	309.7	265.4	176.2		6	2	390.5	392.4	31.6	35.7	719.9	555.8															0.0778435	0.082526	0.14848	0.160009	0.00595415	0.00504819	0.151359	0.127638	0.119254	0.0817595
P61962	FALSE	DDB1- and CUL4-associated factor 7 OS=Homo sapiens OX=9606 GN=DCAF7 PE=1 SV=1	DCAF7		5	3	285.6	336.9	248.5	304	20.4	18.2	398.9	509.1	217.4	191.5		8	4	685.2	640.2	47.9	46.7	1523.7	1079.7															0.132967	0.148362	0.12636	0.137681	0.00506103	0.00491321	0.253366	0.209817	0.0976859	0.088859
P61964	FALSE	WD repeat-containing protein 5 OS=Homo sapiens OX=9606 GN=WDR5 PE=1 SV=1	WDR5																								3	2	322.4	292.5	425.6	436.6	57.3	40.7	506.9	591.6	191	220.8
P61970	FALSE	Nuclear transport factor 2 OS=Homo sapiens OX=9606 GN=NUTF2 PE=1 SV=1	NUTF2		10	3	620.5	635.7	1731.1	2107.6	114.8	123.4	1229.2	1593.5	1326.9	1073.7		26	4	3546.9	3158.4	412.6	348.1	12710.4	11098		12	2	2288.9	2159.6	2037.4	2246.1	241.3	213.1	2671.8	3224	2288.8	2601.3		0.288887	0.279945	0.88025	0.954529	0.0284807	0.0333126	0.780742	0.656734	0.596226	0.498214
P61978	FALSE	Heterogeneous nuclear ribonucleoprotein K OS=Homo sapiens OX=9606 GN=HNRNPK PE=1 SV=1	HNRNPK															321	2	37382.9	35706.4	2421.9	2075.4	71769.3	59622.7		160	2	79.6	71.7	108.4	119.8	4.7	4.7	206.5	257.8	93.4	109.7
P61978-2	FALSE	Isoform 2 of Heterogeneous nuclear ribonucleoprotein K OS=Homo sapiens OX=9606 GN=HNRNPK	HNRNPK		169	2	419.8	561.3	384.1	512.7	26.5	26.4	507.6	800.4	276.2	381.7																								0.195447	0.247182	0.195312	0.232201	0.00657438	0.00712685	0.322409	0.329871	0.124107	0.177115
P61978-3	FALSE	Isoform 3 of Heterogeneous nuclear ribonucleoprotein K OS=Homo sapiens OX=9606 GN=HNRNPK	HNRNPK		169	2	13972.2	15276.3	9732.8	11782.9	536	484.5	22339.3	30275.6	8977.6	8505.1											164	2	9686	8702.8	10303.5	10494.5	771.3	576	23442.7	28484.8	7281.5	7659.2		6.50505	6.72728	4.94905	5.33646	0.132976	0.130794	14.1891	12.4776	4.03397	3.9465
P61981	FALSE	14-3-3 protein gamma OS=Homo sapiens OX=9606 GN=YWHAG PE=1 SV=2	YWHAG		43	7	1915	1911.2	2445.1	3074.2	162.8	139.3	2649.3	3329.5	2113.6	1731		94	8	5649.3	5244.8	346.3	283.6	17141.5	13003.5		57	7	2259.9	1927.6	1211.3	1240	99.9	75	3608.1	4412.1	1152.9	1329.6		0.891569	0.841642	1.24331	1.3923	0.040389	0.0376049	1.68274	1.3722	0.949719	0.803211
P62070	FALSE	Ras-related protein R-Ras2 OS=Homo sapiens OX=9606 GN=RRAS2 PE=1 SV=1	RRAS2		7	3	311.2	336.1	816.2	968.9	25	25.9	469	586.3	422.4	427.3																								0.144886	0.14801	0.415031	0.438813	0.00620224	0.00699187	0.297891	0.241634	0.1898	0.198274
P62072	FALSE	Mitochondrial import inner membrane translocase subunit Tim10 OS=Homo sapiens OX=9606 GN=TIMM10 PE=1 SV=1	TIMM10		26	9	496.5	537.5	300.6	329.7	23.4	21.1	2186.3	2755.5	254.7	227.7		16	5	286	265.4	21.3	19.2	1645.3	1450.9															0.231156	0.236701	0.152853	0.149321	0.0058053	0.00569608	1.38866	1.13563	0.114446	0.105656
P62081	FALSE	40S ribosomal protein S7 OS=Homo sapiens OX=9606 GN=RPS7 PE=1 SV=1	RPS7		32	7	1805.5	1971.9	2707	3722.1	213.7	189.1	2145.3	2782.4	2120.7	1932.4		54	8	7535.2	6106.2	677.3	535.2	12911.2	12295.4		61	8	5829.6	5076	2190.7	2151.6	134.2	119.6	11439.2	13719.5	2329.6	2770.1		0.840588	0.868372	1.37649	1.68573	0.0530168	0.0510488	1.36261	1.14672	0.952909	0.896664
P62136	FALSE	Serine/threonine-protein phosphatase PP1-alpha catalytic subunit OS=Homo sapiens OX=9606 GN=PPP1CA PE=1 SV=1	PPP1CA		18	8	1258.5	1440.3	2852.5	3503.6	225.6	212.3	1829.8	2774.5	2146.9	1886.4		22	4	1385.7	1428.9	170.4	192.7	2440.9	2182.2		14	7	298.4	367	422.3	392.4	61	41.5	540.9	494.1	216.4	271.2		0.585921	0.63427	1.45047	1.58678	0.055969	0.0573118	1.16222	1.14346	0.964682	0.875319
P62191	FALSE	26S proteasome regulatory subunit 4 OS=Homo sapiens OX=9606 GN=PSMC1 PE=1 SV=1	PSMC1		52	16	2469.6	2837.2	3188	4019	239.2	204	5878.5	8138.2	2195.1	2222.4		60	14	9399.9	8306	765.7	653.1	15817	14330		46	11	3649.2	3222.9	1823.9	1737.2	168.4	150.8	6726.9	8566.9	1589.8	1865.3		1.14977	1.24943	1.62107	1.8202	0.0593431	0.0550711	3.7338	3.35402	0.98634	1.03123
P62195	FALSE	26S proteasome regulatory subunit 8 OS=Homo sapiens OX=9606 GN=PSMC5 PE=1 SV=1	PSMC5		23	8	1016.4	1164	1043	1379.7	87.9	104.7	1399.6	2051.4	886.3	867		48	12	4339.9	3904.6	358.8	318.6	8986.1	7643		30	9	1159	1073	671.9	690	63.5	46.1	2295.9	2915.9	675.8	776.9		0.473206	0.512595	0.530357	0.624864	0.0218071	0.0282644	0.888974	0.84545	0.398248	0.402302
P62241	FALSE	40S ribosomal protein S8 OS=Homo sapiens OX=9606 GN=RPS8 PE=1 SV=2	RPS8		36	7	3030.5	3047.1	4218.4	5529.3	360.7	376.8	3318.6	4160.3	4511.2	2940.1		92	8	14356.2	12827.5	1831.9	1628.4	26163	20611		51	8	4623	4017.6	2748.2	2673.7	334.3	309	8451.6	9141	2825.5	3077		1.41091	1.34186	2.14502	2.50421	0.089486	0.10172	2.10785	1.7146	2.02705	1.36425
P62244	FALSE	40S ribosomal protein S15a OS=Homo sapiens OX=9606 GN=RPS15A PE=1 SV=2	RPS15A		19	6	1248.5	1194.9	1210	1517	110.3	96.7	897.3	1114.8	1066.1	760.8		23	6	4449.1	3787.1	478.5	455.3	7771.4	5835.5		18	4	1323.7	1149	980.3	981.7	117.4	94.2	2100.5	2436.8	1275.8	1461.8		0.581265	0.526202	0.615275	0.687047	0.0273643	0.0261048	0.569931	0.459446	0.479038	0.353023
P62249	FALSE	40S ribosomal protein S16 OS=Homo sapiens OX=9606 GN=RPS16 PE=1 SV=2	RPS16		35	9	2961.5	3582.4	4035.5	4900.9	301.6	227.7	4840.1	6204.9	2793.9	2692.9		50	9	6591.8	4751.9	525.2	426.3	15916.6	13674.4		42	5	4975.1	4037.1	1997.5	1893.1	156.4	141.4	8087.2	9471.7	2135.3	2803.1		1.37879	1.57759	2.05202	2.21961	0.0748239	0.0614691	3.07425	2.55725	1.2554	1.24955
P62258	FALSE	14-3-3 protein epsilon OS=Homo sapiens OX=9606 GN=YWHAE PE=1 SV=1	YWHAE		185	18	9357.8	11083.2	12940.4	16390.7	720.6	705	14129.1	18061.7	11396.9	10996.3		395	21	35260.9	31944.2	2302.2	1880.3	95284.9	77981.2		251	20	18157.4	15234.9	11814.1	11908.1	833.8	654.1	25235	35732.6	9430.9	10278.7		4.35672	4.88075	6.58009	7.42332	0.178773	0.190319	8.97428	7.44383	5.12105	5.10245
P62263	FALSE	40S ribosomal protein S14 OS=Homo sapiens OX=9606 GN=RPS14 PE=1 SV=3	RPS14		26	5	832.1	834.7	2196.3	2652.2	313.9	278	991	1291.4	1836.3	1454.4		33	5	4096.7	3367.1	697.9	604.6	6851	5429		24	5	1702.9	1512.9	881.1	799.1	185.9	177.3	2621.8	2784.8	879.9	994.6		0.387402	0.36758	1.1168	1.20118	0.0778754	0.0750479	0.629446	0.532229	0.825118	0.674864
P62266	FALSE	40S ribosomal protein S23 OS=Homo sapiens OX=9606 GN=RPS23 PE=1 SV=3	RPS23		33	5	937.3	1092.4	2009.4	2517	153	130.9	1567.6	1906.4	1438	1323.9		53	6	4051.3	3671.2	628.7	510	6820.8	5494.9		35	5	1301.9	1231.8	894.1	750.8	84.5	75.7	2459.4	2648.3	1042	1090.7		0.43638	0.481064	1.02176	1.13995	0.0379577	0.0353373	0.995681	0.785691	0.646147	0.61431
P62269	FALSE	40S ribosomal protein S18 OS=Homo sapiens OX=9606 GN=RPS18 PE=1 SV=3	RPS18		7	4	558.2	543	603.8	818.1	58.9	45	424.3	509.6	544.7	486		15	6	2746.5	1777.8	303.8	226.9	2486.5	2119.1		16	6	1769.6	1559.2	632.4	581.6	42.4	40.2	1344.9	1499.1	540.7	694.9		0.259882	0.239123	0.307027	0.370516	0.0146125	0.012148	0.269499	0.210023	0.244754	0.225512
P62277	FALSE	40S ribosomal protein S13 OS=Homo sapiens OX=9606 GN=RPS13 PE=1 SV=2	RPS13		24	8	1613.9	2011.9	2869.2	3842.3	288.1	223	1750.6	2226.1	1472.1	1838.8		56	7	11493.8	8598.4	1482	1184.1	11401.2	10041.6		59	8	10204.7	8696.9	5909.8	5362.2	449.1	400.1	11668.1	13833.3	4161	4923.9		0.751385	0.885987	1.45896	1.74017	0.0714746	0.0602003	1.11192	0.91745	0.661469	0.853232
P62280	FALSE	40S ribosomal protein S11 OS=Homo sapiens OX=9606 GN=RPS11 PE=1 SV=3	RPS11		20	8	893.3	810.3	1769.3	2318.6	152.2	137.5	1038.1	1360.9	1500.5	1084.1		39	8	7943.3	6661.3	1145.1	1008.4	11444.5	8321.9		36	9	2867.9	2489.6	1549.1	1504.9	175.5	157.1	6231.6	7315.3	1862.9	2408.3		0.415895	0.356835	0.899675	1.05009	0.0377593	0.037119	0.659362	0.560872	0.674231	0.503039
P62304	FALSE	Small nuclear ribonucleoprotein E OS=Homo sapiens OX=9606 GN=SNRPE PE=1 SV=1	SNRPE															15	2	4459.8	3447.2	381.6	331.1	9192.1	8271.3
P62308	FALSE	Small nuclear ribonucleoprotein G OS=Homo sapiens OX=9606 GN=SNRPG PE=1 SV=1	SNRPG															7	2	671.3	579.9	104.1	87.7	1257.3	1088.9		4	2	209.2	152.4	117.5	109.1	19.7	14.1	326.2	414.9	118.9	115.2
P62312	FALSE	U6 snRNA-associated Sm-like protein LSm6 OS=Homo sapiens OX=9606 GN=LSM6 PE=1 SV=1	LSM6		4	2												3	2	174.4	144	17.9	13.9	384	324.4
P62316	FALSE	Small nuclear ribonucleoprotein Sm D2 OS=Homo sapiens OX=9606 GN=SNRPD2 PE=1 SV=1	SNRPD2		9	5	404.5	467.1	907.5	1042.4	99.9	95.9	460.4	543.4	686.8	591.3		19	6	1479	1225.2	190.8	198.6	2605.9	2199.1		11	4	726.8	628.5	499.8	445.5	75.2	63.9	1078.8	1222.8	364.6	347.4		0.188323	0.205698	0.461456	0.472101	0.0247842	0.0258888	0.292429	0.223953	0.308605	0.274372
P62318	FALSE	Small nuclear ribonucleoprotein Sm D3 OS=Homo sapiens OX=9606 GN=SNRPD3 PE=1 SV=1	SNRPD3		5	2	256.9	259.4	276.2	360.8	33.7	26.9	216.4	293	256	219.6		5	2	1975.5	1451	277.7	260.2	2438.5	1950.1		5	2	285.9	255.8	251.7	249	32.1	26.1	473.8	563.7	192.4	224.2		0.119605	0.114233	0.140445	0.163406	0.00836062	0.00726183	0.137449	0.120755	0.11503	0.101898
P62333	FALSE	26S proteasome regulatory subunit 10B OS=Homo sapiens OX=9606 GN=PSMC6 PE=1 SV=1	PSMC6		17	7	642.9	719.3	852.7	1067.8	66.7	55.9	621.7	851.1	628.6	583.8		14	5	1059.7	1019.7	102.2	90.1	1653.7	1473.1		19	8	1134.8	987.7	612.3	659.1	62.2	45.9	2283.6	2937.2	591.3	676.1		0.299316	0.316761	0.433591	0.483605	0.0165476	0.0150906	0.394881	0.350767	0.282453	0.270892
P62424	FALSE	60S ribosomal protein L7a OS=Homo sapiens OX=9606 GN=RPL7A PE=1 SV=2	RPL7A		25	11	1179.4	1237	1787.2	2347.8	190	162.5	1301.1	1511	1432.1	1162.2		55	12	7796.2	6355.1	1111.2	916.3	13322.3	10409.6		58	15	4562.8	3972.9	2519.9	2391.1	209.9	194.2	5938.7	6949.4	1876.6	2025.4		0.549094	0.544742	0.908777	1.06332	0.047137	0.0438679	0.82641	0.622733	0.643496	0.539279
P62491	FALSE	Ras-related protein Rab-11A OS=Homo sapiens OX=9606 GN=RAB11A PE=1 SV=3	RAB11A		37	11	1241.2	1317	6635.1	7974.8	243	305.4	2225.2	2826.7	4146.7	3892.6		49	10	4564.6	3655.7	318.6	226.5	19718.5	17511.6		26	8	1343.2	1194.5	1014.6	918.6	27.3	20.2	3703.6	4148.4	3051.7	3339.2		0.577867	0.579972	3.37389	3.61178	0.0602858	0.0824447	1.41336	1.16498	1.86327	1.80623
P62495	FALSE	Eukaryotic peptide chain release factor subunit 1 OS=Homo sapiens OX=9606 GN=ETF1 PE=1 SV=3	ETF1		13	7	795.1	811.8	1290.1	1609.4	75.1	71	737.9	1021.3	1310.1	1025.7		28	7	4850.6	4492.8	372.1	321	7772.6	6683		10	5	1564.9	1370.5	1001.3	1019.3	70.9	61.8	2585.6	3554.3	913.5	977.8		0.370176	0.357495	0.656005	0.728895	0.0186315	0.0191669	0.468686	0.420912	0.588677	0.475941
P62701	FALSE	40S ribosomal protein S4, X isoform OS=Homo sapiens OX=9606 GN=RPS4X PE=1 SV=2	RPS4X		32	10	2260.3	2308.2	4792.8	5980.2	385.8	357.7	3073.2	4235.9	3893.5	3047.2		64	11	8315.8	6714	959	931.6	13401.5	10341.9		44	12	7529.9	6290.9	4450.2	4764.6	364.4	321.3	10319.4	11833.5	3399.1	4087.9		1.05233	1.01647	2.4371	2.70842	0.095713	0.0965635	1.95198	1.74576	1.74949	1.41395
P62750	FALSE	60S ribosomal protein L23a OS=Homo sapiens OX=9606 GN=RPL23A PE=1 SV=1	RPL23A		10	5	264.9	323.7	185.4	272.7	25	20	252.4	291.6	161.7	166.8		31	8	4196.2	3399.9	746.6	583.3	4043.7	3531.3		29	8	1622.3	1652.3	1205.9	883.5	82.9	84.1	2742.6	3243.8	829.6	920.9		0.12333	0.142549	0.0942744	0.123505	0.00620224	0.00539913	0.160315	0.120178	0.0726578	0.0773978
P62753	FALSE	40S ribosomal protein S6 OS=Homo sapiens OX=9606 GN=RPS6 PE=1 SV=1	RPS6		41	10	2656.1	2738.3	3868.1	5344.6	399.9	360.9	3020.1	3850.4	3590.6	2855.2		59	10	5658.5	4576.5	720	608.8	9128	7549.3		46	9	5854.7	4942.2	2692.2	2619.5	341.1	285.4	8197	9511.5	2643.4	3019.6		1.2366	1.20587	1.9669	2.42056	0.0992111	0.0974273	1.91825	1.58688	1.61339	1.32486
P62760	FALSE	Visinin-like protein 1 OS=Homo sapiens OX=9606 GN=VSNL1 PE=1 SV=2	VSNL1		7	3	139.4	183.7	417.7	481.2	22.3	20.8	719.2	905.9	309.9	299.7		9	3	223.4	237.6	21	15.2	850.3	657															0.0649006	0.0808966	0.212397	0.217935	0.0055324	0.0056151	0.456809	0.373351	0.13925	0.139065
P62805	FALSE	Histone H4 OS=Homo sapiens OX=9606 GN=HIST1H4A PE=1 SV=2	HIST1H4A; HIST1H4F; HIST1H4D; HIST1H4J; HIST2H4A; HIST2H4B; HIST1H4H; HIST1H4C; HIST4H4; HIST1H4E; HIST1H4I; HIST1H4B; HIST1H4K; HIST1H4L		44	6	3841.7	3889.5	3042.6	3838.9	734.1	600.2	1846.9	2180.9	3082.2	2691.6		89	6	15549.1	8410.6	2107.1	1683.5	9452.3	7357.9		89	6	8131.1	8382.6	8634.3	5976.9	697.2	669.2	12429.8	13850	3883.1	4619.3		1.78858	1.71283	1.54714	1.73863	0.182123	0.162028	1.17308	0.898821	1.38495	1.24894
P62820	FALSE	Ras-related protein Rab-1A OS=Homo sapiens OX=9606 GN=RAB1A PE=1 SV=3	RAB1A		52	5	2774	2882.9	17201.5	21300.9	730.2	742.9	3601.4	4592	11735.8	10259.2		46	3	3305	2931.1	251.3	231.9	11812.6	9548		57	5	7333.9	6370.8	5312.8	5111.7	435.9	290.5	14469.8	15851.9	10646.6	11303.1		1.29149	1.26955	8.74682	9.64715	0.181155	0.200551	2.28747	1.89252	5.27333	4.76043
P62826	FALSE	GTP-binding nuclear protein Ran OS=Homo sapiens OX=9606 GN=RAN PE=1 SV=3	RAN		92	13	3009.7	3092.4	25631.5	26981.7	1201.3	1077.8	3035.7	3704	18703.5	14252.8		52	10	10468.5	9259.1	951.7	808.6	21132.1	15837.6		41	9	3772	3249.9	2712.2	2927.5	228.2	202.6	6440.3	7978.9	2386.3	2446.9		1.40123	1.36181	13.0334	12.22	0.29803	0.290959	1.92816	1.52654	8.40418	6.61352
P62829	FALSE	60S ribosomal protein L23 OS=Homo sapiens OX=9606 GN=RPL23 PE=1 SV=1	RPL23		23	5	999.1	1046.5	3866.4	4805.8	279.5	251.7	1256.8	1669.5	2911.3	2761		31	5	5707.4	3640.8	651.1	550.9	8054.9	6499.6		30	5	2355.8	1978.8	1567.3	1464.8	165.9	154.7	4997.8	5916.3	1291.7	1511.3		0.465152	0.460851	1.96603	2.17654	0.0693411	0.0679481	0.798272	0.688056	1.30816	1.28115
P62841	FALSE	40S ribosomal protein S15 OS=Homo sapiens OX=9606 GN=RPS15 PE=1 SV=2	RPS15		5	2	453.3	506.1	663	913.1	65.3	59.4	580.5	683.1	537.4	545.1																								0.211043	0.222873	0.33713	0.413542	0.0162003	0.0160354	0.368712	0.281528	0.241474	0.252935
P62847	FALSE	40S ribosomal protein S24 OS=Homo sapiens OX=9606 GN=RPS24 PE=1 SV=1	RPS24		12	4	1317.4	1423.4	615.9	872.1	72.5	52.2	573.9	724.7	545.8	531.3		15	3	4548.3	3573.4	795.4	599.5	5131	4308.1		13	4	1116.2	1043.1	584.6	426.7	42.6	57.8	1515.4	1783.9	440.6	515.4		0.613343	0.626828	0.31318	0.394973	0.0179865	0.0140917	0.36452	0.298673	0.245248	0.246531
P62851	FALSE	40S ribosomal protein S25 OS=Homo sapiens OX=9606 GN=RPS25 PE=1 SV=1	RPS25		28	5	1714.3	1832	7797.5	9078.1	440	378.8	2715	3329.6	5336.8	4429.2		28	5	6393.3	4546.4	683.8	584.5	8796.7	7553.1		36	5	6491.3	5487.9	4576.4	4233.9	395	308	10219.4	10987.6	2411	2703.5		0.798128	0.806764	3.96496	4.11146	0.109159	0.10226	1.72447	1.37224	2.39802	2.05522
P62854	FALSE	40S ribosomal protein S26 OS=Homo sapiens OX=9606 GN=RPS26 PE=1 SV=3	RPS26; LOC101929876; RPS26P25		16	4	332.9	342	503.1	622.5	28.9	31.7	390.4	470.5	438.4	325.2		27	2	1274.1	1116.5	177.1	125.5	2543.5	2091.5		16	3	1382.2	1294.4	965.5	904	117.4	101.9	2108.4	2459.7	1047.6	1080.3		0.154989	0.150608	0.255822	0.281929	0.00716979	0.00855762	0.247967	0.193909	0.196989	0.150898
P62857	FALSE	40S ribosomal protein S28 OS=Homo sapiens OX=9606 GN=RPS28 PE=1 SV=1	RPS28		10	2	145.7	124.3	539.6	695.2	30.2	42.9	147	167.2	338.3	254.9		21	2	675.3	632.8	161.6	147.4	1245.9	1067.4															0.0678337	0.0547384	0.274382	0.314855	0.00749231	0.0115811	0.0933689	0.0689087	0.152011	0.118278
P62873	FALSE	Guanine nucleotide-binding protein G(I)/G(S)/G(T) subunit beta-1 OS=Homo sapiens OX=9606 GN=GNB1 PE=1 SV=3	GNB1															21	4	3134.1	2807.3	439.8	433	5310.3	4640.9
P62875	FALSE	DNA-directed RNA polymerases I, II, and III subunit RPABC5 OS=Homo sapiens OX=9606 GN=POLR2L PE=1 SV=1	POLR2L															4	2	1101.4	1090.7	215.1	211.1	1831.4	1471.2
P62879	FALSE	Guanine nucleotide-binding protein G(I)/G(S)/G(T) subunit beta-2 OS=Homo sapiens OX=9606 GN=GNB2 PE=1 SV=3	GNB2		16	6	787.4	839.4	1272.9	1685.3	128.5	120.1	1049.8	1356.8	1055.8	943.3																								0.366591	0.369649	0.647259	0.76327	0.0318795	0.0324218	0.666794	0.559182	0.47441	0.437706
P62888	FALSE	60S ribosomal protein L30 OS=Homo sapiens OX=9606 GN=RPL30 PE=1 SV=2	RPL30		22	6	1107.4	1177.7	2092	2695.2	223.2	190.8	1414.1	1745.1	1547.1	1243.2		35	8	4848.7	4059.7	646	565.3	9737.4	7580.8		22	7	2020.1	1614.5	943.1	907.6	159.8	136.4	3001	3480.2	903.9	868.4		0.515573	0.518628	1.06376	1.22065	0.0553736	0.0515077	0.898183	0.719214	0.69517	0.576864
P62899	FALSE	60S ribosomal protein L31 OS=Homo sapiens OX=9606 GN=RPL31 PE=1 SV=1	RPL31		3	2	354.9	414.7	267.8	403.4	57.7	57.5	268.3	329.6	283.8	257.9		20	5	3964	2987.7	802.8	686.2	3183.1	2721		11	3	1848.1	1667.8	816.9	562.8	75.1	69.6	1925.5	2306.5	575.7	703.4		0.165231	0.182623	0.136174	0.182699	0.0143148	0.0155225	0.170414	0.135839	0.127522	0.11967
P62906	FALSE	60S ribosomal protein L10a OS=Homo sapiens OX=9606 GN=RPL10A PE=1 SV=2	RPL10A		46	9	5193.7	6771.8	7981.2	10289.1	586.2	555	11615.6	15421.8	4849.7	5815.5		111	9	22247.4	19844.5	2088.5	1737.8	41268.3	34736.5		54	8	11646.8	10149.2	5859.9	5538.8	498.9	398.4	17189.7	14868.4	3597.3	3930.6		2.41804	2.98212	4.05837	4.65992	0.14543	0.149826	7.37779	6.35584	2.17915	2.69848
P62910	FALSE	60S ribosomal protein L32 OS=Homo sapiens OX=9606 GN=RPL32 PE=1 SV=2	RPL32		13	5	206.3	259.1	268.1	370.2	81.5	65.2	271	345.1	341.3	304.1		29	6	2239.4	1830.3	449.8	380.7	3369.2	3274		14	4	1600.1	1382.9	878.4	756.9	237.4	192.5	2445.6	2949.4	990.2	1012.8		0.0960473	0.114101	0.136327	0.167663	0.0202193	0.0176012	0.172129	0.142227	0.153359	0.141107
P62913	FALSE	60S ribosomal protein L11 OS=Homo sapiens OX=9606 GN=RPL11 PE=1 SV=2	RPL11		28	3	3382.5	3346.7	6239.1	7130.5	402	376.8	3121.3	3923.7	4790.1	3296.4		37	4	10373	9152	835.3	771.4	12562.1	10057.7		31	3	3952.1	3566.1	2323.7	2350.2	257.8	236.6	7011.7	8134.2	2171.1	2476.3		1.57479	1.4738	3.17253	3.22939	0.0997321	0.10172	1.98253	1.61709	2.15237	1.52958
P62917	FALSE	60S ribosomal protein L8 OS=Homo sapiens OX=9606 GN=RPL8 PE=1 SV=2	RPL8		27	7	898.1	1148.9	1437.1	1738.1	173.9	130.5	1147.6	1466.5	814.7	899.8		91	11	11514.5	9393.3	1408	1175	20262.3	17285.3		44	7	1807	1553	1133.2	1096.4	166.3	141.5	3180.8	3390.3	1022.3	1062.6		0.418129	0.505945	0.730754	0.787183	0.0431428	0.0352293	0.728913	0.604393	0.366075	0.417521
P62937	FALSE	Peptidyl-prolyl cis-trans isomerase A OS=Homo sapiens OX=9606 GN=PPIA PE=1 SV=2	PPIA		68	11	4361.1	4292.7	11813.6	15479.5	996.9	952	4239.5	5463.5	9838.1	7895.2		97	11	17392.7	15118.5	2824.9	2528.3	25713.6	20044.4		103	11	9274.7	8019.2	5667.1	6106.5	965.7	751.4	17090.8	19794.7	3534.2	4012.7		2.0304	1.89039	6.00712	7.01064	0.247321	0.256999	2.69277	2.25169	4.42062	3.6635
P62979	FALSE	Ubiquitin-40S ribosomal protein S27a OS=Homo sapiens OX=9606 GN=RPS27A PE=1 SV=2	RPS27A		81	7	8346.4	8494.3	10679.6	12982.1	555.9	539.8	15809.7	23622.8	9761.6	7049.7		127	7	25484.6	23212	1695.7	1379.4	58281.8	49531.1		75	7	7568.9	6994.1	7049.5	7093	443.5	332	8320.6	9444.5	12712.6	13971.6		3.88584	3.74066	5.43049	5.87957	0.137913	0.145723	10.0417	9.73574	4.38625	3.27117
P62993	FALSE	Growth factor receptor-bound protein 2 OS=Homo sapiens OX=9606 GN=GRB2 PE=1 SV=1	GRB2		10	4	997.9	1128.3	341.6	419.7	31.6	24	1281.6	1578	277.6	271.2		25	8	3144.8	2822.7	200.4	159	4487.6	3891.3		4	2	316.6	299.9	382.8	388.9	19.9	15.5	480.1	573.7	338.2	391.5		0.464593	0.496873	0.173701	0.190082	0.00783963	0.00647896	0.814024	0.650346	0.124736	0.125841
P62995	FALSE	Transformer-2 protein homolog beta OS=Homo sapiens OX=9606 GN=TRA2B PE=1 SV=1	TRA2B		14	3	917.9	1211.9	739.1	669.8	176.2	175.2	1465.9	1939.2	293.7	338		29	5	4291.9	3766.1	880.6	697.6	5813.4	5507.7		8	3	1091.9	657.1	1170	1419.5	326.6	239	1216.6	1383.5	1155.4	990.6		0.427348	0.533689	0.375826	0.303351	0.0437134	0.0472964	0.931085	0.799209	0.13197	0.156837
P63000	FALSE	Ras-related C3 botulinum toxin substrate 1 OS=Homo sapiens OX=9606 GN=RAC1 PE=1 SV=1	RAC1		9	4	401.8	421.8	1184.1	1554	63.9	62.5	489.9	556.6	867.5	748.2		15	5	725.5	705.3	63.1	68.5	1652.8	1295.1		8	4	662.3	570.7	403.9	441	35.5	26.6	1333.2	1498.6	440.9	474.4		0.187066	0.18575	0.602105	0.703804	0.0158529	0.0168723	0.311166	0.229393	0.3898	0.347176
[truncated: 1,738 more rows]

## Sheet: JQ
					Abundances (TMT-1)													Abundances (TMT-2)									Abundances (TMT-3)									Abundances (TMT-4)									Normalized abundances (ACACA, TMT-1)
[truncated: 2,204 more rows]
[truncated: 43 more columns]

## Sheet: St
					Abundances (TMT-1)													Abundances (TMT-2)									Abundances (TMT-3)													Normalized abundances (ACACA, TMT-1)
[truncated: 1,953 more rows]

[truncated: 11 more sheets: C Probe Total Reporter Ion, LD-F-1, LD-F-2, Ar-F-1, Ar-F-2, BD-F-1, BD-F-2, DF-F-1, DF-F-2, Tm-F-1, Tm-F-2]
